# Supplementary material for: Comparative Proteomic Analysis of Two Commonly Used Laboratory Yeast Strains: W303 and BY4742
Source: MDPI journal article supplement (doi:10.3390/proteomes11040030), 2023-10-09
Supplement: s1 [file s1]

**Figure S1:**

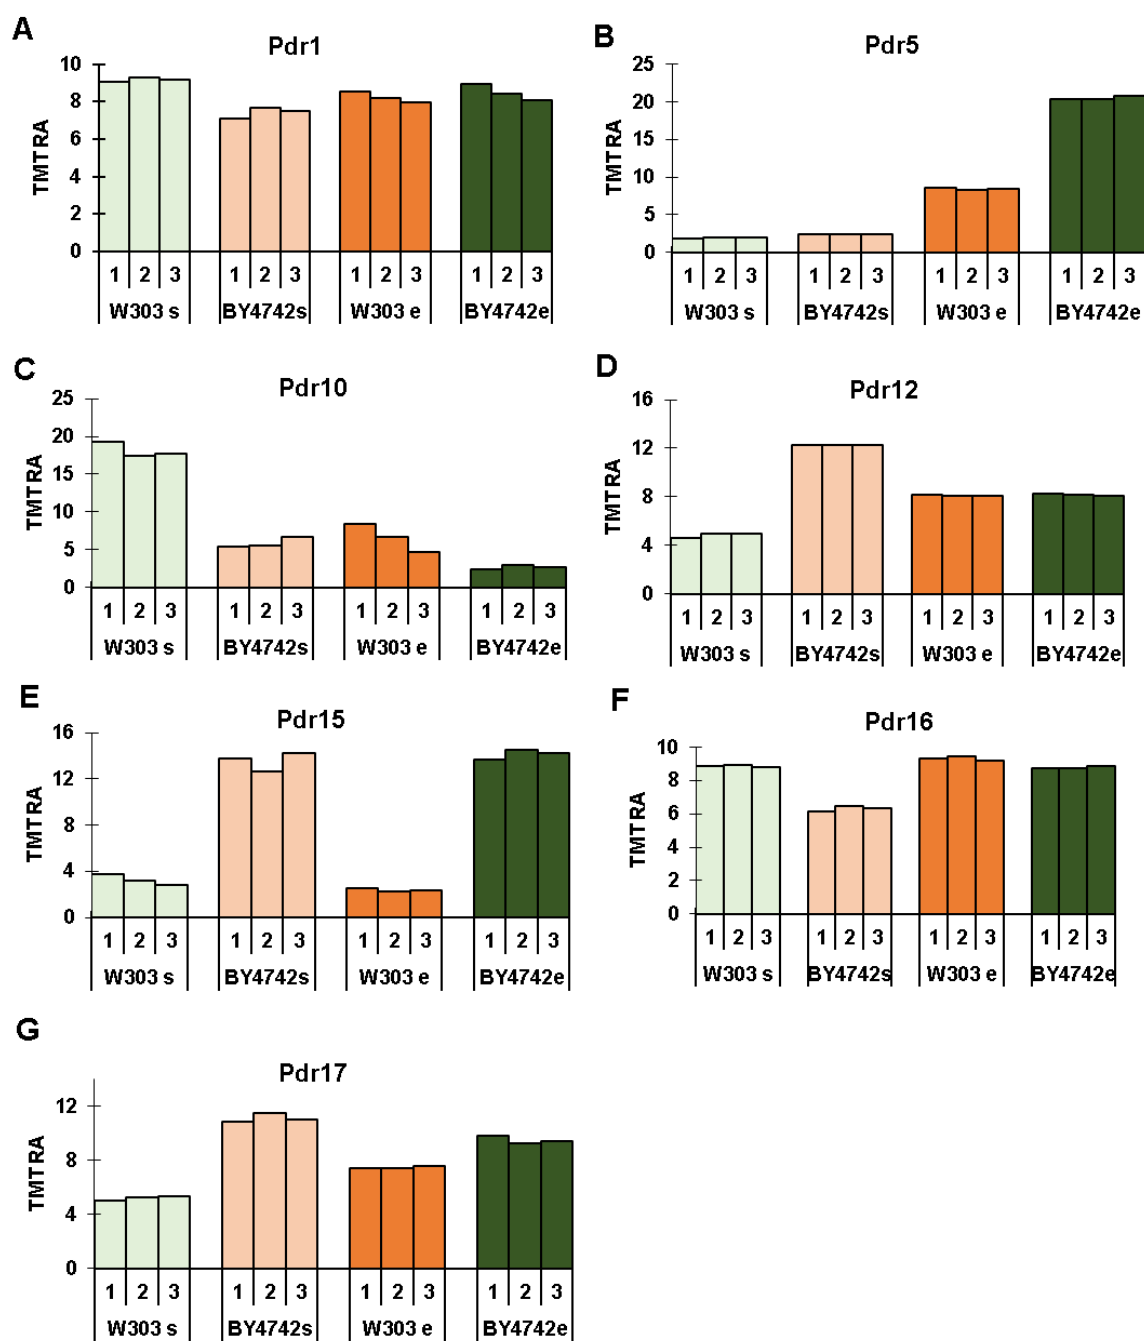

**Fig. S1 Examples of differentially abundant proteins: PDR proteins.** The TMT relative abundance (RA) is presented for several PDR proteins, which are involved in multidrug resistance. Specifically, we highlight **A) Pdr1, B) Pdr5, C) Pdr10, D) Pdr12, E) Pdr15, F) Pdr16, and G) Pdr17.**

**Figure S2:**

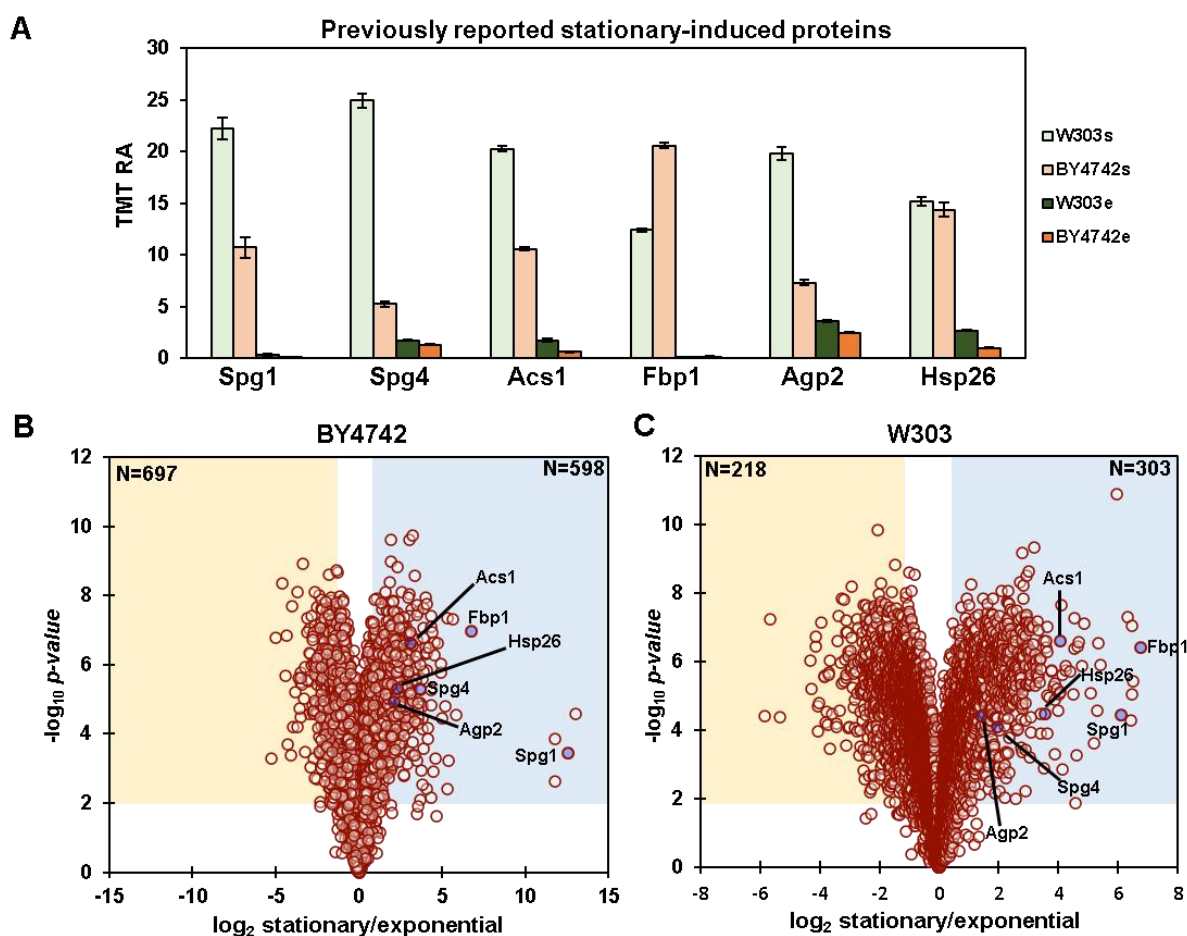

**Fig. S2 Differentially abundant proteins when comparing stationary and exponential growth phase.** **A)** The TMT relative abundance (RA) is shown for previously reported stationary growth phase-induced proteins: the SPG proteins (Spg1 and Spg4); the acetyl-coenzyme A synthetase 1, Acs1; the fructose-1,6-biphosphatase, Fbp1; the general amino acid permease, Agp2 and the heat shock protein, Hsp26. The volcano plots illustrate the differentially abundant proteins (*i.e.*,  $\log_2 > 1$  or  $\log_2 < -1$ ,  $p\text{-value} < 0.01$ ) when comparing the stationary and exponential growth phases in both backgrounds, **B)** BY4742 and **C)** W303. Proteins shown in **A)** are highlighted in the volcano plots.
