# Supplementary material for: Comparative Proteomic Analysis of Two Commonly Used Laboratory Yeast Strains: W303 and BY4742
Source: Proteomes. 2023 Oct 9;11(4):30. doi: 10.3390/proteomes11040030 (PMC10594481; doi:10.3390/proteomes11040030)
Supplement: Supplementary file 1 [file proteomes-11-00030-s001.zip › Table S1_wt .xlsx]

## Sheet: List of the proteins
Table S1: Proteins quantified in the experiment. Columns include: Protein ID, Gene symbol, Description, Number of Peptides assigned to a given protein, and 9 columns of TMT signal-to-noise values that have been scaled to 100 across all channels.
				126_sn scaled	127n_sn scaled	127c_sn scaled	128n_sn scaled	128c_sn scaled	129n_sn scaled	129c_sn scaled	130n_sn scaled	130c_sn scaled	131_sn scaled	131c_sn scaled	132n_sn scaled
Protein Id	Gene Symbol	Description	Number of peptides	W303 stationary rep1	W303 stationary rep2	W303 stationary rep3	BY4742 stationary rep1	BY4742 stationary rep2	BY4742 stationary rep3	W303 exponential rep1	W303 exponential rep2	W303 exponential rep3	BY4742 exponential rep1	BY4742 exponential rep2	BY4742 exponential rep3
sp|P35999|PMIP_YEAST	OCT1	Mitochondrial intermediate peptidase	9	8.03468	8.82052	8.73921	10.8184	10.6676	10.675	7.60881	7.59643	7.5227	6.16815	6.72508	6.62338
sp|P04710|ADT1_YEAST	AAC1	ADP,ATP carrier protein 1	6	16.9879	19.4495	19.7129	9.91907	9.84797	10.2618	2.38853	2.49279	2.74494	2.16015	2.02278	2.01177
sp|P18238|ADT3_YEAST	AAC3	ADP,ATP carrier protein 3	1	6.91479	5.00988	5.68286	6.98504	13.1007	11.0755	5.47129	6.33012	7.2622	8.72142	12.2632	11.183
sp|Q02895|AAD16_YEAST	AAD16	Putative aryl-alcohol dehydrogenase AAD16	1	17.8127	17.09	17.5041	5.36311	4.64881	6.01336	8.40592	8.84745	8.95843	1.96086	1.50905	1.88627
sp|P53909|ADE_YEAST	AAH1	Adenine deaminase	11	1.37409	1.57417	1.49137	1.60676	1.46624	1.74796	15.638	15.233	15.4513	14.3231	14.8654	15.2286
sp|P37898|AAP1_YEAST	AAP1	Alanine/arginine aminopeptidase	26	6.51227	6.76917	6.77704	8.40411	9.03769	8.74096	8.91405	9.03384	8.67036	9.25361	9.01506	8.87184
sp|P32357|AAR2_YEAST	AAR2	A1 cistron-splicing factor AAR2	3	7.81364	8.53397	7.87371	11.1342	10.3694	12.2407	6.03083	6.32668	5.82165	8.30363	7.46277	8.08885
sp|Q01802|AATM_YEAST	AAT1	Aspartate aminotransferase, mitochondrial	12	9.25009	8.95799	9.20852	6.06277	6.27068	6.40004	9.65575	10.1883	9.50635	8.21899	8.17856	8.10199
sp|P23542|AATC_YEAST	AAT2	Aspartate aminotransferase, cytoplasmic	34	8.20019	7.44784	7.89379	9.80113	9.86145	9.5862	7.89735	7.62463	7.82381	7.70779	7.9463	8.20952
sp|P32783|MCES_YEAST	ABD1	mRNA cap guanine-N7 methyltransferase	10	5.88033	6.02333	5.95158	6.77999	7.49196	7.17075	9.98416	9.92968	9.30987	10.5376	10.4558	10.4849
sp|P14164|ABF1_YEAST	ABF1	ARS-binding factor 1	25	5.25047	5.39804	5.37311	6.14088	6.45697	6.41557	10.3615	10.4323	10.0555	11.2941	11.5307	11.291
sp|Q02486|ABF2_YEAST	ABF2	ARS-binding factor 2, mitochondrial	22	9.14158	9.04685	9.0548	11.8383	10.4005	10.5555	5.89618	5.74059	6.21859	7.14157	7.41392	7.55167
sp|P15891|ABP1_YEAST	ABP1	Actin-binding protein	46	5.72217	5.49293	5.75929	11.9023	11.9054	11.9027	6.3297	6.68155	6.70065	9.32583	9.21492	9.06246
sp|Q08641|AB140_YEAST	ABP140	tRNA(Thr) (cytosine(32)-N(3))-methyltransferase	20	4.51067	4.37839	4.34465	6.28571	6.46246	6.54115	10.2323	10.1689	10.0184	12.399	12.7937	11.8646
sp|P37254|ADCS_YEAST	ABZ1	Aminodeoxychorismate synthase	8	6.86312	6.77387	7.11342	7.72311	7.9418	7.88517	10.1115	10.1955	9.76469	8.32065	8.7837	8.52341
sp|Q03266|PABC_YEAST	ABZ2	Aminodeoxychorismate lyase	13	10.335	10.3038	10.5614	9.56812	9.58344	9.62383	6.49796	6.45428	7.05079	6.32187	7.05973	6.63975
sp|P31787|ACBP_YEAST	ACB1	Acyl-CoA-binding protein	9	10.5079	10.8645	11.3604	11.8126	10.2568	9.82181	5.25079	5.30768	6.59464	5.21229	6.0618	6.94877
sp|Q00955|ACAC_YEAST	ACC1	Acetyl-CoA carboxylase	52	7.00392	6.98071	6.93291	5.26821	5.7833	5.58115	12.0068	12.6376	11.2895	9.04407	8.66158	8.81019
sp|P21192|ACE2_YEAST	ACE2	Metallothionein expression activator	4	4.19894	4.16485	4.22585	4.41945	4.483	4.4045	12.9869	13.6959	13.3925	11.7008	11.3256	11.0017
sp|Q12168|ENG2_YEAST	ACF2	Endo-1,3(4)-beta-glucanase 2	9	5.60167	5.20514	5.53368	11.4106	11.3512	11.6738	6.50303	6.81088	6.73522	9.69976	9.34274	10.1323
sp|P47129|ACF4_YEAST	ACF4	Assembly-complementing factor 4	9	5.96157	5.73571	6.07692	6.22822	6.01782	5.96157	10.3071	10.5209	10.48	10.8492	10.827	11.034
sp|P32316|ACH1_YEAST	ACH1	Acetyl-CoA hydrolase	38	17.4739	16.2665	16.2269	14.4247	12.5261	14.7313	1.58375	1.35079	1.8505	1.22865	1.20224	1.13469
sp|Q07622|ACK1_YEAST	ACK1	Activator of C kinase protein 1	5	7.14342	7.55245	7.67326	6.75636	6.84896	6.61898	10.853	10.0127	10.4715	8.69058	8.84938	8.52941
sp|Q03771|ACL4_YEAST	ACL4	Assembly chaperone of RPL4	11	5.24931	5.11428	4.9391	6.41787	6.59697	6.29618	9.99483	10.8247	9.21493	11.5757	11.7881	11.988
sp|P19414|ACON_YEAST	ACO1	Aconitate hydratase, mitochondrial	58	7.6835	7.6781	7.82723	19.4454	19.4571	18.9288	3.55269	3.44255	3.74945	2.8121	2.74778	2.67531
sp|P39533|ACON2_YEAST	ACO2	Homocitrate dehydratase, mitochondrial	16	6.11488	6.06245	6.0847	5.73487	5.94115	6.0294	13.9184	13.5075	13.6434	7.6934	7.44628	7.82371
sp|P32463|ACPM_YEAST	ACP1	Acyl carrier protein, mitochondrial	2	6.42964	7.07926	6.81333	18.119	14.4661	12.4855	5.26974	5.01284	6.49529	5.58494	6.13869	6.10562
sp|Q01574|ACS1_YEAST	ACS1	Acetyl-coenzyme A synthetase 1	50	20.3751	20.6616	19.8525	10.6975	10.3116	10.7851	1.72423	1.59873	2.00969	0.717487	0.675769	0.590743
sp|P52910|ACS2_YEAST	ACS2	Acetyl-coenzyme A synthetase 2	44	5.52332	5.19941	5.12079	7.54095	7.26316	7.17086	13.3488	12.9893	13.7625	7.17759	7.15981	7.74344
sp|P60010|ACT_YEAST	ACT1	Actin	51	8.64523	8.90325	8.62669	9.64398	9.34078	9.58849	7.52119	7.74972	7.5505	7.62956	7.3838	7.41681
sp|Q02336|ADA2_YEAST	ADA2	Transcriptional adapter 2	7	6.02708	6.30051	6.22822	7.32397	7.26383	7.08874	8.60341	9.26096	9.06121	10.5688	11.0877	11.1856
sp|Q03233|ADD37_YEAST	ADD37	Alpha1-proteinase inhibitor-degradation deficient protein 37	5	3.87709	3.54918	3.94319	5.72033	5.48579	5.6651	12.4608	13.1911	12.395	11.4934	11.1967	11.0224
sp|P36040|POC2_YEAST	ADD66	Proteasome assembly chaperone 2	7	8.64978	8.46268	8.26398	7.67235	7.75431	7.79776	8.93697	8.69922	9.85072	7.55007	7.99129	8.37087
sp|P27616|PUR7_YEAST	ADE1	Phosphoribosylaminoimidazole-succinocarboxamide synthase	37	8.18615	8.07967	8.49257	13.6823	13.8838	14.0041	3.30434	3.25727	3.22746	8.12154	8.15455	7.60622
sp|P80210|PURA_YEAST	ADE12	Adenylosuccinate synthetase	31	11.5986	11.511	11.3259	9.90016	10.1148	9.84064	3.92417	3.94497	3.89684	8.00535	8.05802	7.87955
sp|Q05911|PUR8_YEAST	ADE13	Adenylosuccinate lyase	37	7.33294	7.00436	6.99893	12.1127	12.6954	12.0768	4.32721	4.34627	4.16448	9.67903	9.72043	9.54146
sp|P54113|PUR91_YEAST	ADE16	Bifunctional purine biosynthesis protein ADE16	26	10.086	10.095	10.0334	9.12175	9.1352	9.13377	6.84282	6.68023	6.69488	7.52818	7.31119	7.33752
sp|P38009|PUR92_YEAST	ADE17	Bifunctional purine biosynthesis protein ADE17	27	6.14412	5.97671	6.39534	16.9234	16.5792	16.7464	1.18783	0.955919	1.00029	9.39539	9.60979	9.0856
sp|P21264|PUR6_YEAST	ADE2	Phosphoribosylaminoimidazole carboxylase	22	0.868343	0.924728	1.1365	19.3326	18.4446	18.5987	0.560754	0.441647	0.352694	12.8642	13.1565	13.3187
sp|P07245|C1TC_YEAST	ADE3	C-1-tetrahydrofolate synthase, cytoplasmic	37	8.53033	8.83309	8.33716	8.82455	8.23733	8.4522	7.31707	7.37547	7.15368	8.9864	8.83288	9.11984
sp|P04046|PUR1_YEAST	ADE4	Amidophosphoribosyltransferase	27	8.73463	8.35598	8.408	8.42387	8.23102	8.39231	7.60787	7.24589	7.55696	8.60949	9.06766	9.36633
sp|P07244|PUR2_YEAST	ADE5,7	Bifunctional purine biosynthetic protein ADE5,7	40	5.352	5.21628	5.20576	9.54334	9.77796	9.42032	6.30877	6.45469	6.15522	12.5185	12.0009	12.0462
sp|P38972|PUR4_YEAST	ADE6	Phosphoribosylformylglycinamidine synthase	39	6.90734	5.67107	5.79854	9.5527	10.5746	9.1775	6.78784	6.65044	6.67074	10.5625	10.5605	11.0862
sp|P04161|PUR3_YEAST	ADE8	Phosphoribosylglycinamide formyltransferase	15	6.79717	6.77664	6.64154	10.2478	10.4707	10.8667	6.32943	6.13478	6.02797	9.98247	9.90315	9.82161
sp|P00330|ADH1_YEAST	ADH1	Alcohol dehydrogenase 1	52	5.80591	5.70093	5.80941	9.25497	9.26214	8.88457	8.28351	8.76832	8.45694	9.93732	9.91674	9.91924
sp|P00331|ADH2_YEAST	ADH2	Alcohol dehydrogenase 2	26	20.9045	20.5567	20.9822	5.339	5.31917	5.72224	6.01735	5.89231	5.9935	1.12857	1.09405	1.05035
sp|P07246|ADH3_YEAST	ADH3	Alcohol dehydrogenase 3, mitochondrial	37	9.09704	9.2528	9.49509	14.1868	14.6063	14.7116	4.22988	4.1744	4.29758	5.46707	5.42859	5.05278
sp|P10127|ADH4_YEAST	ADH4	Alcohol dehydrogenase 4	17	30.3736	30.3503	29.119	0.782564	0.575199	1.59688	1.27252	1.20041	1.04529	1.36637	1.19614	1.12176
sp|P38113|ADH5_YEAST	ADH5	Alcohol dehydrogenase 5	10	12.6412	12.8472	12.7019	9.95837	9.89617	9.92317	5.99005	6.15066	5.92352	4.69742	4.50301	4.76731
sp|Q04894|ADH6_YEAST	ADH6	NADP-dependent alcohol dehydrogenase 6	32	9.95833	9.92216	11.0216	3.53546	4.36461	4.42776	11.0008	9.84689	9.35344	8.68805	9.1974	8.68357
sp|Q03677|MTND_YEAST	ADI1	1,2-dihydroxy-3-keto-5-methylthiopentene dioxygenase	6	8.49572	8.88946	8.81647	7.99132	8.56773	7.67635	10.4454	11.2515	10.8773	5.40492	5.57551	6.00831
sp|P07170|KAD2_YEAST	ADK1	Adenylate kinase	30	8.32201	7.06593	7.18369	5.70888	6.17706	5.48046	12.609	12.7231	12.708	7.15916	7.3305	7.53225
sp|P26364|KAD3_YEAST	ADK2	GTP:AMP phosphotransferase, mitochondrial	2	2.88065	3.58832	3.30963	9.39295	9.6991	9.72569	9.20317	7.84324	8.52992	12.6633	12.3362	10.8278
sp|P47143|ADK_YEAST	ADO1	Adenosine kinase	32	5.55592	5.59134	5.70331	7.45765	7.68254	7.79645	9.73205	9.81747	9.58571	10.2518	10.4603	10.3655
sp|P25371|ADP1_YEAST	ADP1	Probable ATP-dependent permease	14	12.0056	12.2025	12.8012	9.22761	9.2271	10.1814	4.77693	4.37952	4.51938	6.7174	7.01792	6.94347
sp|P07248|ADR1_YEAST	ADR1	Regulatory protein ADR1	24	11.2365	11.1783	11.6667	14.2771	14.1964	13.8058	2.92243	2.62698	2.94558	5.08262	4.94355	5.11812
sp|P25613|ADY2_YEAST	ADY2	Accumulation of dyads protein 2	11	26.0455	30.0664	29.5515	1.26239	1.36987	1.79023	2.77963	2.63814	2.61921	0.699897	0.606234	0.571023
sp|Q05955|ADY4_YEAST	ADY4	Accumulates dyads protein 4	1	10.1597	11.7208	9.49091	6.3481	12.5855	6.58554	9.22046	10.1731	3.29472	6.23296	8.51578	5.67244
sp|P32493|AEP1_YEAST	AEP1	ATPase expression protein 1, mitochondrial	8	8.68769	8.854	9.65681	9.89813	10.141	9.63185	8.80385	8.64334	8.24949	5.75894	5.97215	5.70276
sp|P22136|AEP2_YEAST	AEP2	ATPase expression protein 2, mitochondrial	15	9.78748	10.0706	10.6557	7.12146	7.52689	7.44455	9.01335	8.87139	8.58202	7.21279	6.85036	6.86345
sp|Q12089|AEP3_YEAST	AEP3	ATPase expression protein 3	1	12.0468	10.5654	11.5322	6.66276	7.19383	7.92666	7.02994	8.38191	5.94234	8.92307	7.0307	6.76438
sp|P32317|AFG1_YEAST	AFG1	Protein AFG1	13	10.2827	10.2092	10.9293	10.8835	11.1979	11.13	5.74806	5.51132	6.40248	5.77369	6.00215	5.92979
sp|P32794|AFG2_YEAST	AFG2	ATPase family gene 2 protein	17	4.82812	4.76054	4.75178	5.28247	5.33994	5.01227	11.5248	11.5547	11.3251	11.9451	11.7896	11.8857
sp|P39925|AFG3_YEAST	AFG3	Mitochondrial respiratory chain complexes assembly protein AFG3	21	8.68658	8.53847	8.65387	11.2081	10.7185	10.6508	7.64644	7.34341	7.86025	6.31001	6.07215	6.31145
sp|Q99222|AFI1_YEAST	AFI1	ARF3-interacting protein 1	2	6.96559	8.78234	8.64329	7.27723	8.69419	7.44178	8.86653	8.92565	9.42712	7.9093	8.03908	9.02788
sp|P33304|AFR1_YEAST	AFR1	Protein AFR1	1	5.73925	7.14397	7.79094	4.30088	5.85989	5.98775	12.4551	15.3296	10.2302	9.59286	9.09127	6.4783
sp|P22149|AFT1_YEAST	AFT1	Iron-regulated transcriptional activator AFT1	4	4.83233	5.0699	5.62561	5.03921	5.8704	4.90343	9.12519	9.52507	9.52949	13.4934	13.9245	13.0615
sp|Q08957|AFT2_YEAST	AFT2	Iron-regulated transcriptional activator AFT2	1	2.59572	2.95577	2.13409	4.80373	5.547	4.70104	12.314	12.5352	15.2667	17.5271	8.23055	11.3891
sp|Q12482|AGC1_YEAST	AGC1	Mitochondrial aspartate-glutamate transporter AGC1	13	9.66797	10.3218	10.4255	10.704	11.0063	10.8372	6.46426	6.88022	6.46046	5.90785	5.74518	5.5792
sp|Q04412|AGE1_YEAST	AGE1	ADP-ribosylation factor GTPase-activating protein effector protein 1	3	8.26015	9.08923	8.57709	6.51289	6.32235	6.41517	9.70615	9.34236	10.2433	8.53286	8.73346	8.265
sp|P40529|AGE2_YEAST	AGE2	ADP-ribosylation factor GTPase-activating protein effector protein 2	9	5.77992	5.51837	5.62068	7.77447	7.23356	7.0803	8.9415	8.11574	9.78778	10.8787	10.999	12.27
sp|P25376|AGP1_YEAST	AGP1	General amino acid permease AGP1	12	10.3828	11.3077	11.3219	11.4945	11.8248	11.6559	6.94915	7.22743	7.44171	3.41333	3.72654	3.25437
sp|P38090|AGP2_YEAST	AGP2	General amino acid permease AGP2	7	18.5036	20.3003	20.6635	6.86766	7.49782	7.68052	3.56129	3.56177	3.823	2.44591	2.63285	2.46184
sp|P43567|AGX1_YEAST	AGX1	Alanine--glyoxylate aminotransferase 1	18	12.585	12.0368	12.5316	15.4359	16.53	15.7682	2.90423	2.92686	3.13317	2.17029	1.98122	1.99673
sp|Q12449|AHA1_YEAST	AHA1	Hsp90 co-chaperone AHA1	28	14.0091	14.1811	14.3169	6.20109	6.31457	6.57255	9.03891	9.46831	8.92912	3.59854	3.66328	3.70651
sp|Q12433|AHC1_YEAST	AHC1	Protein AHC1	2	5.73194	5.71019	4.26439	6.79841	5.75346	5.87681	10.8908	11.6706	9.93669	11.6852	10.9496	10.732
sp|P38013|AHP1_YEAST	AHP1	Peroxiredoxin AHP1	30	10.9047	9.99544	9.78315	5.07274	5.94135	5.43718	6.502	6.75083	6.28673	11.2758	11.0556	10.9945
sp|P03875|AI1M_YEAST	AI1	Putative COX1/OXI3 intron 1 protein	4	4.74026	6.09636	5.87322	5.48058	6.34653	5.81553	10.703	12.4176	8.51488	12.6105	11.3989	10.0026
sp|P03877|SCE3_YEAST	AI3	Intron-encoded DNA endonuclease aI3	1	16.8341	13.7623	17.3252	4.90959	5.64154	6.87473	6.95243	9.13472	7.54973	3.69504	3.23459	4.08604
sp|P03878|SCE2_YEAST	AI4	Intron-encoded DNA endonuclease aI4	1	7.34814	7.16595	7.3626	5.88895	7.39326	5.22467	9.91193	11.1125	9.62006	10.2474	8.9438	9.78076
sp|P52923|AIF1_YEAST	AIF1	Apoptosis-inducing factor 1	4	0.323363	0.50967	0.738327	12.91	13.5955	12.3939	0.381634	0.245967	0	19.8203	19.5537	19.5276
sp|P39965|SYPM_YEAST	AIM10	Probable proline--tRNA ligase, mitochondrial	14	12.0148	11.9647	12.15	9.2731	9.21418	9.29322	7.0484	6.9245	7.54403	4.82086	4.87486	4.87741
sp|P87275|AIM11_YEAST	AIM11	Altered inheritance of mitochondria protein 11	4	10.3538	10.465	10.4866	11.6269	10.9154	11.4097	7.0512	6.77389	7.28352	4.44896	4.40703	4.77809
sp|P53109|AIM14_YEAST	AIM14	Probable metalloreductase AIM14	3	13.2855	13.6319	13.7812	5.85156	5.76993	5.44963	8.2799	8.57448	7.72832	6.00395	6.03967	5.60397
sp|P23180|AIM17_YEAST	AIM17	Probable oxidoreductase AIM17	22	11.3271	10.7586	10.9718	17.1884	15.5793	16.1048	2.60308	2.51912	3.02095	3.20432	3.19932	3.52326
sp|P38884|AIM18_YEAST	AIM18	Altered inheritance of mitochondria protein 18, mitochondrial	13	13.8358	14.2716	14.4948	9.00373	9.20474	9.41128	5.93882	5.83556	5.58377	4.03119	4.24484	4.14383
sp|P40502|AIM19_YEAST	AIM19	Altered inheritance of mitochondria protein 19, mitochondrial	5	16.2897	17.2822	17.3091	11.9115	12.0439	11.8294	2.25938	2.41722	2.87246	2.04573	1.98699	1.75241
sp|P39721|AIM2_YEAST	AIM2	Protein AIM2	15	12.0817	12.2439	12.1441	13.4792	13.442	13.4027	3.87486	3.96485	4.0637	3.73302	3.71394	3.85601
sp|P40563|AIM21_YEAST	AIM21	Altered inheritance of mitochondria protein 21	21	8.66676	8.61859	8.69698	7.82514	8.40724	8.40358	8.61986	9.15436	9.53208	7.27798	7.4102	7.38723
sp|P47051|LPLA_YEAST	AIM22	Putative lipoate-protein ligase A	4	3.58704	3.07535	3.30591	13.5279	13.9397	13.2646	6.97938	5.98678	6.61025	8.8509	10.6503	10.2219
sp|P47015|AIM23_YEAST	AIM23	Altered inheritance of mitochondria protein 23, mitochondrial	10	11.2713	10.9408	11.1997	9.94241	10.1761	10.1271	6.50909	6.61989	6.57442	5.48063	5.53253	5.62605
sp|P47127|AIM24_YEAST	AIM24	Altered inheritance of mitochondria protein 24, mitochondrial	17	11.2934	11.4912	11.8219	12.3592	12.4338	12.3532	5.2944	5.14992	5.29566	4.20719	4.2152	4.08498
sp|P47140|AIM25_YEAST	AIM25	Altered inheritance rate of mitochondria protein 25	8	9.48629	9.94878	9.4919	12.3959	12.5655	12.4944	5.37179	5.65797	6.31034	5.71554	5.44508	5.11644
sp|P36154|AIM29_YEAST	AIM29	Altered inheritance rate of mitochondria protein 29	7	9.68393	9.17566	9.65367	9.59321	9.43793	9.14072	6.94526	6.64258	6.75959	7.45255	7.8231	7.6918
sp|P38266|AIM3_YEAST	AIM3	Altered inheritance of mitochondria protein 3	12	9.69152	9.11798	9.61729	10.8728	10.1647	10.3291	6.29466	6.10082	6.86692	6.56268	7.19361	7.18796
sp|Q04689|AIM32_YEAST	AIM32	Altered inheritance of mitochondria protein 32	5	10.8658	10.1337	10.7893	13.7051	12.7794	13.0448	5.67722	5.43155	5.67419	3.7801	3.90127	4.2175
sp|Q03798|AIM36_YEAST	AIM36	Altered inheritance of mitochondria protein 36, mitochondrial	13	9.32404	9.47568	9.31958	9.8658	9.65383	10.2149	7.2297	7.24566	7.33051	6.72894	7.01112	6.60019
sp|Q08223|AIM39_YEAST	AIM39	Altered inheritance of mitochondria protein 39, mitochondrial	8	13.8	14.5932	14.474	8.07047	8.3351	8.38014	6.37014	6.34097	6.41162	4.46392	4.34346	4.41707
sp|P38305|AIM4_YEAST	AIM4	Altered inheritance of mitochondria protein 4	1	6.22106	6.15258	6.31684	10.3428	9.39621	10.6545	8.14514	8.25273	7.01392	9.24321	10.4086	7.85236
sp|Q12032|AIM41_YEAST	AIM41	Altered inheritance of mitochondria protein 41, mitochondrial	26	13.0346	13.0399	13.0618	16.4872	13.3092	15.0216	2.7708	2.64474	3.02502	2.49121	2.59104	2.52282
sp|Q99299|AIM44_YEAST	AIM44	Altered inheritance of mitochondria protein 44	1	2.70349	1.96838	2.89939	21.0158	21.5055	20.324	2.83174	2.50955	1.27156	7.82145	9.32452	5.82462
sp|Q12480|ETFA_YEAST	AIM45	Probable electron transfer flavoprotein subunit alpha, mitochondrial	10	7.94908	7.97622	8.04978	11.1525	10.8944	11.2336	6.92616	6.81819	7.18683	7.2292	7.29647	7.28752
sp|P38885|AIM46_YEAST	AIM46	Altered inheritance of mitochondria protein 46, mitochondrial	16	18.2123	17.8498	17.4522	7.72626	7.23356	7.55793	4.87064	4.82182	5.35274	2.86234	3.02829	3.032
sp|Q07716|AIM6_YEAST	AIM6	Altered inheritance of mitochondria protein 6	12	8.10108	8.09282	8.30032	11.4562	11.6313	11.9986	5.94081	6.25205	6.09718	7.54655	7.1423	7.4408
sp|Q12156|AIM7_YEAST	AIM7	Protein AIM7	5	6.74695	6.91453	7.60955	9.85788	10.5915	9.90635	7.78992	7.40004	7.17238	8.97796	8.49325	8.53967
sp|P40053|AIM9_YEAST	AIM9	Altered inheritance of mitochondria protein 9, mitochondrial	34	9.19704	9.27623	9.4421	10.8959	10.6847	10.8959	6.39905	6.14385	6.54889	6.8953	6.85046	6.77059
sp|P46680|AIP1_YEAST	AIP1	Actin-interacting protein 1	26	8.20734	8.14661	8.14105	11.8852	12.5936	11.8041	5.54004	5.88489	5.64294	7.28384	7.49344	7.37698
sp|P40507|AIR1_YEAST	AIR1	Protein AIR1	1	2.6381	2.42959	2.91744	3.18109	3.93397	3.4095	13.1241	12.2467	12.8307	14.0655	15.2958	13.9273
sp|Q12476|AIR2_YEAST	AIR2	Protein AIR2	3	6.85633	6.47391	6.91556	5.9857	6.92	6.51361	10.1181	10.1294	10.6133	9.31739	10.2562	9.90049
sp|P38080|AKL1_YEAST	AKL1	Serine/threonine-protein kinase AKL1	22	7.55691	7.44971	7.82261	9.65578	9.63761	9.7563	7.2577	6.92109	7.5402	8.71355	9.10806	8.58048
sp|P39010|AKR1_YEAST	AKR1	Palmitoyltransferase AKR1	9	10.0642	10.9654	10.6909	6.98758	6.86295	7.01338	6.39254	6.50217	6.98318	9.08297	9.24231	9.21243
sp|Q12013|AKR2_YEAST	AKR2	Probable palmitoyltransferase AKR2	5	15.1159	15.0362	15.4186	6.64924	6.63768	7.62873	6.12223	5.71429	6.4335	5.11009	4.93364	5.19984
sp|P47019|ALB1_YEAST	ALB1	Ribosome biogenesis protein ALB1	11	2.09842	1.96575	2.11647	2.50312	2.48659	2.37502	14.551	14.6256	15.5235	13.4645	13.7626	14.5274
sp|P47771|ALDH2_YEAST	ALD2	Aldehyde dehydrogenase [NAD(P)+] 1	18	14.2354	14.4645	14.2626	13.058	13.181	13.4748	2.7933	2.91227	2.94844	3.01035	2.84755	2.81179
sp|P54114|ALDH3_YEAST	ALD3	Aldehyde dehydrogenase [NAD(P)+] 2	17	13.707	14.354	13.7445	13.7991	13.7771	14.1033	3.6502	3.65012	4.01399	1.7897	1.71301	1.69784
sp|P46367|ALDH4_YEAST	ALD4	Potassium-activated aldehyde dehydrogenase, mitochondrial	44	22.0507	23.2695	22.4366	6.54615	6.75863	7.1926	2.41341	2.38829	2.47213	1.48904	1.47151	1.51144
sp|P40047|ALDH5_YEAST	ALD5	Aldehyde dehydrogenase 5, mitochondrial	22	8.29631	8.23566	8.40221	5.37583	5.30538	5.4303	10.1247	9.7154	9.51997	9.96174	9.80163	9.83085
sp|P54115|ALDH6_YEAST	ALD6	Magnesium-activated aldehyde dehydrogenase, cytosolic	48	5.1069	5.10728	5.14631	9.30692	9.35696	9.23045	9.27973	9.43845	9.17024	9.54812	9.66329	9.64535
sp|Q08548|ALE1_YEAST	ALE1	Lysophospholipid acyltransferase	16	8.54949	8.89722	8.91459	8.26103	8.73173	8.9587	6.53425	6.18938	6.00904	9.71335	9.73254	9.50869
sp|P53904|TBCB_YEAST	ALF1	Tubulin-specific chaperone B	2	9.19814	9.92314	10.1811	8.24296	9.09193	8.68724	6.60463	7.02695	8.41105	7.5019	7.28586	7.84515
sp|P16661|ALG1_YEAST	ALG1	Chitobiosyldiphosphodolichol beta-mannosyltransferase	3	7.99057	8.97052	8.3221	8.86766	9.47142	9.29524	7.12985	7.5249	6.89569	9.3085	7.98131	8.24222
sp|P53954|ALG11_YEAST	ALG11	GDP-Man:Man(3)GlcNAc(2)-PP-Dol alpha-1,2-mannosyltransferase	21	8.63714	8.44843	8.68271	10.6919	10.4854	10.5026	6.7028	6.54135	6.51958	7.59162	7.3839	7.81249
sp|P53730|ALG12_YEAST	ALG12	Dol-P-Man:Man(7)GlcNAc(2)-PP-Dol alpha-1,6-mannosyltransferase	15	8.11324	9.07848	8.97068	9.11765	10.0527	10.1518	7.33037	7.4854	6.90308	7.73778	7.96815	7.0907
sp|P53178|ALG13_YEAST	ALG13	UDP-N-acetylglucosamine transferase subunit ALG13	4	9.29707	8.66	8.84045	7.41043	7.39066	7.66117	8.55299	8.54572	8.53148	7.88838	8.55453	8.66711
sp|P38242|ALG14_YEAST	ALG14	UDP-N-acetylglucosamine transferase subunit ALG14	2	8.81324	10.5316	10.8362	6.53034	6.89066	7.84837	8.1779	8.50023	8.7097	6.67565	7.65523	8.8309
sp|P43636|ALG2_YEAST	ALG2	Alpha-1,3/1,6-mannosyltransferase ALG2	6	8.24178	8.08561	7.73028	8.9054	8.95577	8.8447	8.92054	8.4744	7.74208	7.77545	8.50498	7.81902
sp|P38179|ALG3_YEAST	ALG3	Dol-P-Man:Man(5)GlcNAc(2)-PP-Dol alpha-1,3-mannosyltransferase	2	7.10697	8.01702	8.22969	10.6186	11.1245	10.9034	7.26624	7.0671	6.9091	7.99562	7.27307	7.48866
sp|P40350|ALG5_YEAST	ALG5	Dolichyl-phosphate beta-glucosyltransferase	9	5.50747	5.61991	5.97494	6.81521	7.06088	6.86904	9.96038	10.0462	9.4393	11.138	10.7436	10.825
sp|Q12001|ALG6_YEAST	ALG6	Dolichyl pyrophosphate Man9GlcNAc2 alpha-1,3-glucosyltransferase	5	8.15946	8.49687	8.81215	8.49203	9.17613	9.197	7.73833	7.52182	7.50776	8.08723	8.47805	8.33317
sp|P40351|ALG8_YEAST	ALG8	Dolichyl pyrophosphate Glc1Man9GlcNAc2 alpha-1,3-glucosyltransferase	4	7.27572	8.47448	8.30688	5.99749	6.74573	7.03425	9.04138	8.90814	8.98245	8.66282	10.1956	10.3751
sp|P53868|ALG9_YEAST	ALG9	Alpha-1,2-mannosyltransferase ALG9	15	8.96437	9.31161	9.58036	9.99343	10.1171	10.5317	7.08752	6.89397	6.69813	7.0317	6.94522	6.8449
sp|P43633|ALK1_YEAST	ALK1	Serine/threonine-protein kinase Haspin homolog ALK1	4	3.87025	4.20127	3.91658	2.49002	2.51526	2.2876	14.607	15.1962	14.2749	12.3343	12.7907	11.5159
sp|P54783|ALO_YEAST	ALO1	D-arabinono-1,4-lactone oxidase	31	9.83604	9.63831	9.93551	8.15365	8.30389	8.28618	7.33415	7.1301	7.90421	7.59256	7.66429	8.22112
sp|Q08269|ALR1_YEAST	ALR1	Magnesium transporter ALR1	15	10.4926	10.5366	11.0288	3.1884	3.18421	3.36321	10.264	9.87732	10.3382	9.17999	9.19532	9.35138
sp|P52893|ALAM_YEAST	ALT1	Probable alanine aminotransferase, mitochondrial	19	9.4051	9.42793	9.77307	12.1608	10.6553	10.8047	6.35595	6.13853	6.67519	5.80234	6.30123	6.49993
sp|P52892|ALAT_YEAST	ALT2	Probable alanine aminotransferase	4	4.21629	3.95854	4.46899	5.44655	5.46461	4.35199	11.329	11.4557	10.5613	13.3654	13.0035	12.3781
sp|P36117|ALY1_YEAST	ALY1	Arrestin-related trafficking adapter 6	8	6.33532	5.78007	5.72154	8.91729	8.99152	8.89994	7.29981	7.15375	7.91272	11.0178	10.7495	11.2207
sp|P47029|ALY2_YEAST	ALY2	Arrestin-related trafficking adapter 3	11	5.97146	6.77843	6.68005	9.5961	9.81748	9.88757	8.61696	8.62267	8.56943	8.42412	8.81069	8.22504
sp|P15274|AMPD_YEAST	AMD1	AMP deaminase	22	7.73645	7.90395	8.08139	10.326	10.9596	10.823	6.97923	7.14669	7.03786	7.9047	7.63386	7.4672
sp|P22580|AMDY_YEAST	AMD2	Probable amidase	1	13.3177	14.3349	13.599	10.2077	10.0922	9.41761	7.0316	7.04322	7.09688	2.67844	2.23773	2.94295
sp|P38313|CENPU_YEAST	AME1	Inner kinetochore subunit AME1	4	4.50118	4.2989	4.11927	6.78766	6.88163	5.37147	8.28331	9.3397	9.30181	13.8191	13.3027	13.9932
sp|P38285|AMN1_YEAST	AMN1	Antagonist of mitotic exit network protein 1	3	4.28501	4.5307	4.64925	4.21924	4.42822	5.06358	11.7225	11.8632	11.6866	12.3904	12.6219	12.5394
sp|P22855|MAN1_YEAST	AMS1	Alpha-mannosidase	38	16.8865	17.052	16.714	12.166	12.5134	12.5249	2.20848	2.17378	2.49023	1.82073	1.77011	1.67978
sp|P19211|IF5A2_YEAST	ANB1	Eukaryotic translation initiation factor 5A-2	1	4.086	3.45525	3.14377	11.291	11.1675	10.4483	6.37696	6.59322	6.86263	12.584	12.3865	11.605
sp|P32629|ANP1_YEAST	ANP1	Mannan polymerase II complex ANP1 subunit	13	7.74241	7.7462	8.02313	7.19299	7.26039	7.31916	10.6167	10.3149	9.80912	8.0401	8.03424	7.90074
sp|P36090|ANR2_YEAST	ANR2	Uncharacterized protein ANR2	11	9.92335	10.6383	10.2501	7.16322	7.22909	7.7975	8.49449	8.49583	8.41057	7.07885	6.85993	7.65868
sp|Q06497|ANT1_YEAST	ANT1	Peroxisomal adenine nucleotide transporter 1	11	10.9864	12.1393	13.1732	8.94366	8.89932	9.57384	6.42068	6.4143	6.0409	5.76319	5.81498	5.83031
sp|Q03687|ANY1_YEAST	ANY1	Scramblase ANY1	2	2.28663	2.19358	2.09264	2.53605	2.92355	3.4086	15.4829	14.8032	14.4752	13.0852	12.9203	13.7922
sp|Q06624|RHC31_YEAST	AOS1	DNA damage tolerance protein RHC31	5	10.46	8.45131	8.25958	8.35685	10.4094	7.6925	8.19367	8.40208	7.86135	7.40835	7.68855	6.81634
sp|P16550|APA1_YEAST	APA1	Protein APA1	27	6.14176	6.09012	5.95033	6.79497	6.90602	6.34329	10.6857	10.4491	10.1826	10.1201	10.1626	10.1734
sp|P22108|APA2_YEAST	APA2	Diadenosine 5',5'''-P1,P4-tetraphosphate phosphorylase 2	15	7.38823	7.24646	7.81252	12.2456	12.2803	12.0535	6.94087	7.13605	6.81468	6.40715	6.75806	6.91658
sp|P53886|APC1_YEAST	APC1	Anaphase-promoting complex subunit 1	9	6.35443	6.55915	6.27705	7.02864	7.7918	7.46066	9.86825	10.0818	8.87176	10.0887	9.762	9.85581
sp|Q04601|APC4_YEAST	APC4	Anaphase-promoting complex subunit 4	6	7.14148	7.20941	7.41483	8.44026	8.88123	8.01881	8.83951	9.10959	8.07958	9.28599	8.74267	8.83664
sp|Q08683|APC5_YEAST	APC5	Anaphase-promoting complex subunit 5	4	6.2798	7.0361	6.87838	8.81705	8.74577	9.25001	8.85875	8.84769	7.80826	9.39596	9.02905	9.05317
sp|P38281|APD1_YEAST	APD1	Actin patches distal protein 1	14	7.33311	7.31995	7.69409	9.12753	8.97764	8.92505	8.83055	8.78936	9.18636	7.78829	8.19516	7.83294
sp|P14904|AMPL_YEAST	APE1	Vacuolar aminopeptidase 1	31	15.1673	15.3764	15.0794	9.38956	9.53874	9.84864	5.16524	5.30601	5.31492	3.34802	3.30279	3.16309
sp|P32454|APE2_YEAST	APE2	Aminopeptidase 2, mitochondrial	38	10.9072	10.8686	11.0654	11.6597	11.7247	11.2108	5.53809	5.35481	5.49038	5.5473	5.30681	5.32638
sp|P37302|APE3_YEAST	APE3	Aminopeptidase Y	25	4.42741	4.39693	4.45274	12.2927	12.5529	12.6481	7.53033	7.37812	7.50769	9.10281	8.83129	8.87887
sp|P38821|DNPEP_YEAST	APE4	Aspartyl aminopeptidase 4	11	10.1723	9.52251	10.1883	13.6482	13.0054	12.7645	4.30287	4.30153	5.30017	5.37963	5.53024	5.88441
sp|P53940|APJ1_YEAST	APJ1	J domain-containing protein APJ1	2	8.1713	7.67546	8.82108	13.2595	13.3999	13.6077	6.10128	6.12395	6.19883	5.54546	5.71971	5.37585
sp|P27351|AP2B_YEAST	APL1	AP-2 complex subunit beta	7	2.26894	2.05782	2.12104	10.0066	10.4109	10.0325	10.8607	10.5202	10.4369	10.4432	10.6273	10.2139
sp|P36000|AP1B1_YEAST	APL2	AP-1 complex subunit beta-1	19	10.2671	10.3255	10.0559	7.60858	8.20449	8.24449	8.16071	8.20547	8.47658	6.68861	6.85978	6.90282
sp|P38065|AP2A_YEAST	APL3	AP-2 complex subunit alpha	15	1.41912	1.4786	1.50737	14.1673	14.363	14.0036	4.6429	4.38184	4.30057	13.5057	13.0307	13.1993
sp|Q12028|AP1G1_YEAST	APL4	AP-1 complex subunit gamma-1	15	9.75809	9.80046	9.82528	7.76782	7.34735	8.07036	8.25562	8.08578	7.93382	7.57368	7.64457	7.93717
sp|Q08951|AP3D_YEAST	APL5	AP-3 complex subunit delta	14	7.28104	7.76469	7.81926	7.153	7.38553	7.5675	8.56068	8.35136	7.84668	10.2095	10.2536	9.80714
sp|P46682|AP3B_YEAST	APL6	AP-3 complex subunit beta	18	6.51065	6.89425	6.8363	6.68235	6.96399	6.9361	9.50161	9.16648	8.91565	10.7284	10.3604	10.5038
sp|Q00776|AP1M1_YEAST	APM1	AP-1 complex subunit mu-1-I	13	9.8809	9.60204	10.0772	6.71822	7.18058	7.11003	9.01268	8.68614	9.00508	7.21387	7.78936	7.72385
sp|P38700|APM2_YEAST	APM2	Adaptin medium chain homolog APM2	3	8.74368	7.74695	8.67994	11.8075	10.8055	9.71301	6.61362	6.61743	6.78819	8.11365	7.24899	7.12151
sp|P38153|AP3M_YEAST	APM3	AP-3 complex subunit mu	8	6.30408	6.53951	6.51071	7.22332	7.63823	7.38777	9.66182	10.0393	8.94971	9.69556	10.2201	9.82984
sp|Q99186|AP2M_YEAST	APM4	AP-2 complex subunit mu	9	9.68679	9.5912	12.0153	7.38423	7.66719	7.47355	9.09646	9.29229	9.21364	6.06991	6.17363	6.33584
sp|P22936|APN1_YEAST	APN1	Apurinic-apyrimidinic endonuclease 1	15	8.19629	8.31913	8.55496	7.87857	7.91392	8.04828	9.01667	8.89514	9.31242	7.84487	7.95625	8.0635
sp|P53933|APP1_YEAST	APP1	Phosphatidate phosphatase APP1	3	11.3056	10.658	11.1608	9.73238	8.79581	9.22233	7.11609	6.87782	7.3091	5.99968	5.89276	5.92966
sp|P40532|APQ12_YEAST	APQ12	Nuclear membrane organization protein APQ12	3	5.72331	5.99903	6.42191	11.0874	9.78722	11.0785	8.61435	7.39461	8.36741	8.07139	8.41747	9.03742
sp|P35181|AP1S1_YEAST	APS1	AP-1 complex subunit sigma-1	3	7.34524	7.63267	9.27961	7.298	8.29878	7.75722	7.60466	8.70624	9.71729	8.50531	8.55685	9.29812
sp|P47064|AP3S_YEAST	APS3	AP-3 complex subunit sigma	6	7.64211	8.05836	8.18056	9.09158	9.04347	9.52743	7.86303	7.21208	6.92142	8.9625	8.78762	8.70983
sp|P49435|APT1_YEAST	APT1	Adenine phosphoribosyltransferase 1	16	6.67897	6.58195	6.65858	5.61011	5.5609	5.97043	10.9887	10.8318	10.2972	10.3078	10.0907	10.4228
sp|P36973|APT2_YEAST	APT2	Adenine phosphoribosyltransferase 2	3	11.4558	11.6203	12.0394	3.68251	3.03769	3.89345	11.4733	11.53	13.0079	5.76359	5.8291	6.66689
sp|P0CD91|AQY1_YEAST	AQY1	Aquaporin-1	2	16.3371	17.5955	18.2531	15.2162	13.929	16.3476	1.00379	0.550366	0.761796	0	0.00217075	0.00339714
sp|P43549|AQY3_YEAST	AQY3	Aquaglycerol porin AQY3	2	13.8019	14.4974	13.0077	7.65214	8.28192	8.38538	5.64021	4.99463	4.6918	6.77321	6.24236	6.03129
sp|P38115|ARA1_YEAST	ARA1	D-arabinose dehydrogenase [NAD(P)+] heavy chain	37	12.6587	12.33	12.1804	11.1884	11.4318	11.2428	4.60977	4.71055	4.70986	5.05834	4.8915	4.98793
sp|Q04212|ARA2_YEAST	ARA2	D-arabinose 1-dehydrogenase	9	18.1074	18.8879	17.6991	7.64633	8.06339	8.58185	3.92956	4.45733	4.35804	2.60136	2.81289	2.85492
sp|P40024|ARB1_YEAST	ARB1	ABC transporter ATP-binding protein ARB1	39	5.63999	5.63431	5.50397	5.66872	5.68622	5.36496	10.6166	10.6375	10.5611	11.6258	11.547	11.5137
sp|P46672|ARC1_YEAST	ARC1	tRNA-aminoacylation cofactor ARC1	40	5.595	5.82939	5.70221	7.79617	7.97278	8.15883	9.34002	9.39985	9.04251	10.5795	10.4295	10.1542
sp|P40518|ARPC5_YEAST	ARC15	Actin-related protein 2/3 complex subunit 5	23	9.05901	8.98535	8.85478	7.94343	7.68658	7.83032	9.70097	9.49243	8.66564	7.24076	7.20139	7.33934
sp|Q05933|ARPC3_YEAST	ARC18	Actin-related protein 2/3 complex subunit 3	6	12.4329	10.5853	10.3742	8.0401	9.98086	8.98363	6.60867	7.43062	6.85017	5.39847	6.63662	6.67847
sp|P33204|ARPC4_YEAST	ARC19	Actin-related protein 2/3 complex subunit 4	9	10.1013	10.4406	10	9.23665	9.9189	9.05126	7.69339	8.14474	6.3033	6.09198	6.37649	6.64131
sp|P53731|ARPC2_YEAST	ARC35	Actin-related protein 2/3 complex subunit 2	14	10.0734	9.70879	10.4422	10.1037	10.1578	9.82305	7.04815	6.61752	7.5138	5.89784	6.16377	6.44998
sp|P38328|ARPC1_YEAST	ARC40	Actin-related protein 2/3 complex subunit 1	14	9.82375	9.83654	10.0738	9.44035	9.69825	9.62252	7.07692	7.55977	7.26508	6.49952	6.23908	6.86448
sp|P07347|ARD1_YEAST	ARD1	N-terminal acetyltransferase A complex catalytic subunit ARD1	10	4.57505	4.41865	4.45519	6.39523	6.12142	6.00956	9.96598	10.9058	9.4282	12.1487	12.2127	13.3635
sp|P53629|ARE2_YEAST	ARE2	Sterol O-acyltransferase 2	7	10.5248	11.2721	11.1926	4.77996	5.07068	5.28175	11.2465	11.0761	11.0069	6.25906	6.29001	5.99955
sp|P11076|ARF1_YEAST	ARF1	ADP-ribosylation factor 1	7	7.3634	6.14523	5.93578	8.32953	7.24627	7.35986	9.74179	8.29353	9.41916	9.3017	9.47161	11.3921
sp|P19146|ARF2_YEAST	ARF2	ADP-ribosylation factor 2	4	13.051	10.4185	10.0392	13.4421	10.9578	10.2267	5.27645	4.01269	5.56607	5.15973	5.27525	6.57463
sp|P40994|ARF3_YEAST	ARF3	ADP-ribosylation factor 3	6	9.80075	9.8755	9.21972	8.13993	9.36691	8.86353	7.80377	8.05444	7.52843	7.34506	7.07464	6.92733
sp|P22768|ASSY_YEAST	ARG1	Argininosuccinate synthase	29	16.2309	16.3057	15.4917	3.51004	3.42246	3.87402	11.1564	11.3235	11.4283	2.27285	2.35722	2.62681
sp|P40360|NAGS_YEAST	ARG2	Amino-acid acetyltransferase, mitochondrial	8	13.7645	13.8035	13.5636	7.84156	8.05305	8.4775	7.38035	7.31262	7.51587	4.09025	4.10827	4.08897
sp|P05150|OTC_YEAST	ARG3	Ornithine carbamoyltransferase	6	15.5857	15.4314	15.3648	1.63954	1.69716	1.89099	14.4035	14.406	14.3579	1.64614	1.66375	1.9131
sp|P04076|ARLY_YEAST	ARG4	Argininosuccinate lyase	22	13.8334	14.5178	14.0471	7.83976	7.92828	8.25599	7.64323	7.70151	7.57824	3.65982	3.4957	3.49913
sp|Q01217|ARG56_YEAST	ARG5,6	Protein ARG5,6, mitochondrial	28	14.7623	14.6678	14.4306	5.03011	5.03159	5.27961	10.6452	10.6516	10.796	2.8251	2.93806	2.94201
sp|Q04728|ARGJ_YEAST	ARG7	Arginine biosynthesis bifunctional protein ArgJ, mitochondrial	21	10.9572	11.1119	11.217	5.99962	6.09972	6.36061	10.852	11.0548	10.8076	4.98352	5.25835	5.29778
sp|P18544|ARGD_YEAST	ARG8	Acetylornithine aminotransferase, mitochondrial	14	14.7036	14.4441	14.8212	3.57935	3.32018	3.84838	11.2442	11.3866	11.9304	3.63524	3.47718	3.60965
sp|P05085|ARGR2_YEAST	ARG81	Arginine metabolism regulation protein II	2	6.82316	6.69134	5.6776	6.35611	6.26934	7.18636	9.05745	9.52479	8.70581	11.8611	10.7566	11.0903
sp|P07250|IPMK_YEAST	ARG82	Inositol polyphosphate multikinase	1	10.4788	8.97623	12.6433	7.87748	8.4965	9.28397	6.60836	7.02719	6.62909	7.52444	7.77337	6.68135
sp|P48360|ADRO_YEAST	ARH1	Probable NADPH:adrenodoxin oxidoreductase, mitochondrial	9	10.6916	10.6314	10.6747	8.07157	7.82774	7.70952	7.37808	7.68156	7.9277	7.02114	7.35478	7.03017
sp|P53111|ARI1_YEAST	ARI1	NADPH-dependent aldehyde reductase ARI1	22	6.96408	6.59907	6.67116	3.53943	3.42426	3.46175	13.1695	13.0041	13.7487	9.52575	9.60853	10.2837
sp|P53974|ARK1_YEAST	ARK1	Actin-regulating kinase 1	6	11.2988	12.7735	11.5477	7.59016	8.25778	8.37969	6.70196	6.93279	6.74379	6.64383	6.64559	6.48438
sp|P38116|ARL1_YEAST	ARL1	ADP-ribosylation factor-like protein 1	12	7.53599	8.22208	8.04766	5.98333	7.24	7.05477	9.24947	9.41344	8.93263	9.71345	9.29244	9.31475
sp|Q02804|ARL3_YEAST	ARL3	ADP-ribosylation factor-like protein 3	3	12.5165	12.578	9.78873	4.51948	5.83928	6.16974	9.13444	9.61062	8.70363	7.35143	6.4964	7.29174
sp|P38731|ARN1_YEAST	ARN1	Siderophore iron transporter ARN1	1	12.9825	14.1094	14.7113	1.1477	1.72949	2.15033	9.56084	10.0556	9.99783	8.27354	7.19531	8.08613
sp|P08566|ARO1_YEAST	ARO1	Pentafunctional AROM polypeptide	45	8.22379	8.13669	8.09707	5.60277	5.96953	5.95095	11.3607	11.5324	11.1154	8.0199	8.04159	7.94918
sp|Q06408|ARO10_YEAST	ARO10	Transaminated amino acid decarboxylase	22	8.02536	7.67154	7.53165	5.99629	6.33752	6.15219	13.9783	14.0222	14.1265	5.21222	5.29574	5.65045
sp|P28777|AROC_YEAST	ARO2	Chorismate synthase	20	5.49616	5.46751	5.30614	5.34992	5.37913	5.50413	10.976	11.3763	10.9262	11.3103	11.431	11.4771
sp|P14843|AROF_YEAST	ARO3	Phospho-2-dehydro-3-deoxyheptonate aldolase, phenylalanine-inhibited	21	9.29291	9.04725	9.36314	8.91609	9.017	9.07519	8.80622	8.65653	8.64327	6.28903	6.40441	6.48895
sp|P32449|AROG_YEAST	ARO4	Phospho-2-dehydro-3-deoxyheptonate aldolase, tyrosine-inhibited	29	7.10406	6.98565	6.66357	4.67987	4.65389	4.76915	12.961	13.1309	12.9089	8.67492	8.62195	8.84611
sp|P32178|CHMU_YEAST	ARO7	Chorismate mutase	15	4.90108	5.06976	5.17015	6.74588	7.14076	6.76521	11.5253	11.2111	11.0047	10.4155	10.3767	9.67396
sp|P53090|ARO8_YEAST	ARO8	Aromatic/aminoadipate aminotransferase 1	27	6.73303	6.62437	6.51552	10.5171	10.0892	10.2103	7.56778	7.61619	7.69332	9.11774	8.51303	8.80238
sp|Q04052|ARO80_YEAST	ARO80	Transcriptional activator ARO80	2	8.01908	7.86811	7.8387	8.15336	8.93019	8.33768	8.98201	9.31337	9.44937	7.98147	6.45284	8.67382
sp|P38840|ARO9_YEAST	ARO9	Aromatic amino acid aminotransferase 2	36	6.66403	6.28619	6.42153	11.474	11.323	11.2811	9.47999	9.32994	9.47158	6.05659	6.06494	6.14712
sp|P38696|ARP1_YEAST	ARP1	Centractin	1	9.14981	8.2946	8.9967	9.80543	10.1768	9.45525	6.8379	6.64314	6.22791	8.12533	8.489	7.79815
sp|P32381|ARP2_YEAST	ARP2	Actin-related protein 2	26	10.7161	10.0278	10.0918	8.44625	9.8442	8.62309	7.01492	7.41376	7.08324	7.0774	6.85918	6.8022
sp|P47117|ARP3_YEAST	ARP3	Actin-related protein 3	24	9.31079	8.47715	8.66372	8.33919	8.57024	8.04888	8.40112	8.08743	8.63688	7.68899	7.80436	7.97126
sp|P80428|ARP4_YEAST	ARP4	Actin-related protein 4	17	8.90286	8.5986	8.61649	8.28878	8.28306	8.44247	7.81892	7.90061	8.2161	7.99377	8.38678	8.55156
sp|P53946|ARP5_YEAST	ARP5	Actin-related protein 5	17	7.50902	7.65263	7.46802	8.22632	7.72236	7.88773	8.13659	8.22427	7.9931	10.072	9.45334	9.65466
sp|Q12509|ARP6_YEAST	ARP6	Actin-like protein ARP6	2	6.58426	7.56799	7.27905	8.99757	10.2638	10.1314	7.78159	7.86174	6.7686	9.50634	8.74489	8.5128
sp|Q12406|ARP7_YEAST	ARP7	Actin-related protein 7	16	6.86511	6.82359	6.95094	6.51198	6.76951	6.5887	10.8597	11.1713	10.1477	8.82927	9.15125	9.33094
sp|Q12386|ARP8_YEAST	ARP8	Actin-like protein ARP8	18	8.15563	8.08906	8.03697	7.45912	7.51114	7.64575	8.57167	8.24102	8.82987	8.87402	9.28171	9.30405
sp|Q05123|ARP9_YEAST	ARP9	Actin-like protein ARP9	12	7.07542	7.05477	7.15501	6.2964	6.44471	6.38858	10.6156	10.8064	10.0316	9.18807	9.47709	9.46642
sp|Q06597|ARR2_YEAST	ARR2	Arsenical-resistance protein 2	1	4.05935	5.04966	4.82023	4.84056	7.12826	6.17754	10.7797	12.902	12.2609	10.6103	11.4046	9.96686
sp|P18634|ART10_YEAST	ART10	Arrestin-related trafficking adapter 10	6	6.92609	7.32419	7.41777	10.0313	9.83091	9.87339	8.69897	8.48934	8.73788	7.58785	7.81799	7.26432
sp|P53244|ART5_YEAST	ART5	Arrestin-related trafficking adapter 5	3	4.97824	4.57414	4.3659	7.6471	7.27957	6.53496	10.735	10.2516	9.34741	11.6335	12.0655	10.5872
sp|Q03862|ARX1_YEAST	ARX1	Probable metalloprotease ARX1	19	3.52306	3.53034	3.47932	3.95907	3.99147	3.84502	13.5109	13.4269	13.2495	12.5539	12.4361	12.4944
sp|Q06822|ASA1_YEAST	ASA1	ASTRA-associated protein 1	3	10.7471	11.2014	10.3996	7.50969	8.67642	7.8414	7.66216	7.55816	6.48011	7.51306	7.55384	6.85698
sp|P38011|GBLP_YEAST	ASC1	Guanine nucleotide-binding protein subunit beta-like protein	21	3.39316	3.22731	3.07712	3.78284	3.77223	3.76346	13.6417	13.9863	12.9337	12.7716	12.888	12.7626
sp|P50275|ASE1_YEAST	ASE1	Anaphase spindle elongation protein	1	3.40051	5.1894	5.82562	3.77397	3.8622	4.01584	13.6748	11.2043	13.7513	12.4942	11.6627	11.1451
sp|P32447|ASF1_YEAST	ASF1	Histone chaperone ASF1	6	7.85604	6.9468	6.90793	9.58602	9.11473	8.55886	7.73792	7.40939	8.58816	8.90497	8.37334	10.0159
sp|P40467|ASG1_YEAST	ASG1	Activator of stress genes 1	11	5.3341	5.17041	5.32582	7.08163	7.61629	7.14339	9.82121	9.58438	9.32031	11.5665	11.1654	10.8706
sp|P34233|ASH1_YEAST	ASH1	Transcriptional regulatory protein ASH1	2	8.87411	11.3654	10.5383	8.69634	12.0608	11.2408	5.93365	5.90722	5.15428	7.12434	6.47062	6.63413
sp|P54074|ASI1_YEAST	ASI1	Protein ASI1	7	5.58025	5.10718	5.51108	6.89718	7.15049	6.32549	11.1615	11.1669	11.2161	10.1334	9.53843	10.212
sp|P53895|ASI2_YEAST	ASI2	Protein ASI2	1	5.99838	6.30708	6.06264	5.49341	6.47809	5.78668	9.84278	10.7942	9.11516	10.7592	11.7718	11.5906
sp|P53983|ASI3_YEAST	ASI3	Protein ASI3	3	7.31955	6.69768	5.83124	6.7252	6.84161	7.82259	8.97787	9.29529	9.18296	11.0926	9.50471	10.7087
sp|P35734|ASK1_YEAST	ASK1	DASH complex subunit ASK1	3	3.69767	3.11671	2.88741	5.53668	7.46313	7.13917	9.03317	9.63016	12.1013	12.8279	12.3989	14.1679
sp|P48361|ASK10_YEAST	ASK10	Activator of SKN7 protein 10	15	8.1599	8.15354	8.13001	6.71797	6.86353	6.98534	11.272	10.5064	11.363	7.46577	7.61726	6.76537
sp|Q05166|NUP59_YEAST	ASM4	Nucleoporin ASM4	10	7.70284	6.47188	7.21573	6.10498	6.01475	6.17344	11.0244	10.8454	10.669	8.75122	9.31209	9.71426
sp|P49089|ASNS1_YEAST	ASN1	Asparagine synthetase [glutamine-hydrolyzing] 1	30	7.40143	7.16676	7.25644	5.53852	5.37796	5.5247	11.8515	11.923	11.9431	8.67623	8.58457	8.75582
sp|P49090|ASNS2_YEAST	ASN2	Asparagine synthetase [glutamine-hydrolyzing] 2	30	5.44738	5.04292	4.99794	6.65872	6.55345	6.39247	9.40889	9.3171	9.27424	12.496	12.1075	12.3034
sp|P38986|ASPG1_YEAST	ASP1	L-asparaginase 1	10	3.29055	3.27227	3.36042	5.68491	5.61214	5.34562	10.892	10.7745	10.3512	13.8836	13.7957	13.7369
sp|P35183|AST1_YEAST	AST1	Protein AST1	8	5.50794	5.27511	5.09572	6.70941	7.2327	6.79721	9.99873	8.97196	9.8387	11.3204	11.2806	11.9715
sp|P39945|AST2_YEAST	AST2	Protein AST2	11	15.1632	14.4693	14.8716	9.50623	8.68976	8.69911	5.00817	4.63337	5.65598	4.1239	4.3469	4.8325
sp|P16639|ATE1_YEAST	ATE1	Arginyl-tRNA--protein transferase 1	9	7.50886	7.33792	7.01983	9.87746	10.6354	10.0207	7.44109	7.46264	7.26767	8.4439	8.73903	8.24545
sp|P40353|ATF1_YEAST	ATF1	Alcohol O-acetyltransferase 1	3	1.81383	1.80939	2.06382	2.58317	2.66731	2.66002	11.8942	12.5368	10.9702	17.3752	16.4454	17.1806
sp|P53296|ATF2_YEAST	ATF2	Alcohol O-acetyltransferase 2	10	2.09026	2.16581	1.95331	2.8011	2.53815	2.57949	17.4578	16.5335	16.911	11.5291	11.6857	11.7547
sp|P53104|ATG1_YEAST	ATG1	Serine/threonine-protein kinase ATG1	8	11.187	11.3969	11.0535	10.3662	11.0698	10.3668	5.49537	5.06612	5.13845	6.45431	6.09302	6.31257
sp|Q12527|ATG11_YEAST	ATG11	Autophagy-related protein 11	6	7.25176	7.22044	6.86411	7.96769	7.47019	8.31407	8.93071	9.38782	9.5526	8.95693	8.56166	9.52202
sp|Q06628|ATG13_YEAST	ATG13	Autophagy-related protein 13	10	11.1408	10.7654	12.2065	9.43103	9.01835	9.67148	6.0729	5.84883	5.9778	6.3527	6.70545	6.80882
sp|P38270|ATG14_YEAST	ATG14	Autophagy-related protein 14	1	11.2112	10.583	12.4731	10.3018	10.0491	9.27617	5.511	8.19053	3.8006	4.35752	7.00899	7.23701
sp|P25641|ATG15_YEAST	ATG15	Putative lipase ATG15	3	13.7726	13.7462	14.6849	7.94159	8.401	8.20391	5.83244	6.1111	5.55811	5.35741	5.16373	5.22706
sp|Q03818|ATG16_YEAST	ATG16	Autophagy protein 16	1	12.0363	14.1432	13.2014	10.0355	10.1594	10.5216	3.38712	5.26269	4.7511	5.64566	5.64489	5.21105
sp|Q06410|ATG17_YEAST	ATG17	Autophagy-related protein 17	6	9.90653	9.77732	9.19402	14.3301	13.9616	13.8279	4.67973	4.06827	4.44696	5.25566	5.36808	5.18379
sp|P43601|ATG18_YEAST	ATG18	Autophagy-related protein 18	10	7.30676	7.40101	7.1501	10.221	11.0029	10.8255	7.0444	6.60094	6.38139	8.99121	8.77782	8.29693
sp|P35193|ATG19_YEAST	ATG19	Autophagy-related protein 19	6	9.57074	9.00909	9.98295	6.52476	6.66197	6.52083	9.47553	10.04	10.5881	7.28687	6.61735	7.72177
sp|P53855|ATG2_YEAST	ATG2	Autophagy-related protein 2	6	6.77764	7.177	6.92058	10.5248	10.5217	10.8054	6.36602	6.6535	6.19575	9.29592	9.39037	9.37128
sp|Q07528|ATG20_YEAST	ATG20	Autophagy-related protein 20	12	10.3335	10.597	10.5777	10.1866	10.5644	10.4582	6.44179	6.34726	6.40531	6.19759	6.07926	5.81138
sp|Q02887|ATG21_YEAST	ATG21	Autophagy-related protein 21	9	11.3557	11.4712	11.6134	8.93152	8.87188	8.64888	5.97719	6.57232	5.94281	7.11064	7.07307	6.43143
sp|P25568|ATG22_YEAST	ATG22	Autophagy-related protein 22	2	17.6081	18.1175	18.6289	6.58572	7.59709	8.70527	4.50684	2.34301	4.91128	4.46029	3.09161	3.44435
sp|Q06671|ATG23_YEAST	ATG23	Autophagy-related protein 23	6	12.5452	13.2024	13.6443	6.98687	7.39254	7.40204	6.71687	7.10973	7.19935	6.25772	5.90132	5.64173
sp|Q06321|ATG26_YEAST	ATG26	Sterol 3-beta-glucosyltransferase	11	10.6483	10.1389	10.6512	10.8538	10.5677	10.5244	5.96482	5.45452	5.98254	6.42933	6.34385	6.44062
sp|P46989|ATG27_YEAST	ATG27	Autophagy-related protein 27	13	9.71077	9.68831	9.67759	8.39605	8.88469	8.6489	7.33732	7.55885	7.31097	7.71395	7.72362	7.34899
sp|P40344|ATG3_YEAST	ATG3	Autophagy-related protein 3	6	12.4259	12.7129	12.6476	11.1141	11.4207	11.2923	4.96824	5.04507	5.13452	4.57558	4.42336	4.23968
sp|P40458|ATG32_YEAST	ATG32	Autophagy-related protein 32	8	19.4835	19.687	20.0461	8.26548	8.46506	8.29507	2.83011	3.04461	3.18586	2.20225	2.26666	2.22834
sp|Q06485|ATG33_YEAST	ATG33	Autophagy-related protein 33	3	15.6088	15.865	16.5001	12.8302	13.533	13.4767	2.09268	2.01353	2.42341	1.90419	1.87823	1.87419
sp|Q12292|ATG34_YEAST	ATG34	Autophagy-related protein 34	5	22.9076	23.0656	22.4795	5.02485	5.46272	5.9331	3.03122	2.91298	3.09204	2.14781	1.97496	1.96762
sp|Q05789|ATG38_YEAST	ATG38	Autophagy-related protein 38	4	12.1963	11.2612	11.8038	12.3738	11.4903	11.5422	4.79101	4.47348	5.3063	4.72471	4.99543	5.04143
sp|Q06159|ATG39_YEAST	ATG39	Autophagy-related protein 39	1	19.696	20.3307	20.509	10.5217	10.1074	10.4991	1.8304	1.48441	1.68285	1.09103	1.12246	1.12484
sp|P53867|ATG4_YEAST	ATG4	Cysteine protease ATG4	3	10.7132	12.5458	11.4087	10.3717	10.6437	9.62738	5.9571	5.57447	5.60302	5.39676	6.19149	5.96656
sp|Q99325|ATG40_YEAST	ATG40	Autophagy-related protein 40	2	11.8363	11.6855	13.1129	11.19	10.0734	10.0143	4.48559	6.7298	4.34815	5.14256	6.31214	5.06941
sp|Q12380|ATG5_YEAST	ATG5	Autophagy protein 5	3	10.177	11.314	10.866	10.3594	10.228	10.2771	6.06858	5.99169	6.20966	6.13696	6.19465	6.1771
sp|P38862|ATG7_YEAST	ATG7	Ubiquitin-like modifier-activating enzyme ATG7	11	8.83138	8.93403	9.35417	12.649	12.9859	13.2403	5.19592	4.91723	5.26555	6.42773	6.24523	5.95358
sp|P38182|ATG8_YEAST	ATG8	Autophagy-related protein 8	6	15.1976	15.4832	15.6088	10.8864	11.0101	11.3494	3.76993	3.71118	4.1377	2.98958	2.93482	2.92135
sp|Q12142|ATG9_YEAST	ATG9	Autophagy-related protein 9	3	10.1093	9.75207	10.2515	9.04445	10.0009	8.98121	8.16011	7.71042	7.36515	6.50459	6.61366	5.50669
sp|P48016|ATH1_YEAST	ATH1	Vacuolar acid trehalase	21	16.9677	17.0661	17.0826	11.7587	11.8673	12.2867	2.14977	2.2082	2.35551	2.1615	2.14363	1.9523
sp|P40416|ATM1_YEAST	ATM1	Iron-sulfur clusters transporter ATM1, mitochondrial	13	10.9926	10.5708	10.5972	7.96307	8.13295	8.14077	8.12914	7.87937	7.56783	6.78839	6.60182	6.63611
sp|P32907|ATO2_YEAST	ATO2	Ammonia transport outward protein 2	8	24.8469	26.4777	28.9234	3.25498	3.36839	4.1906	2.18976	2.05287	2.591	0.597581	0.811815	0.69503
sp|Q12359|ATO3_YEAST	ATO3	Ammonia transport outward protein 3	4	19.9315	22.3285	22.5425	0.323249	0.389794	1.04298	5.54824	5.88311	5.58968	6.14611	5.37096	4.9034
sp|P07251|ATPA_YEAST	ATP1	ATP synthase subunit alpha, mitochondrial	46	10.401	10.2603	10.4596	15.7886	15.1847	15.0948	4.14088	3.91913	4.27598	3.37161	3.49631	3.60712
sp|P18496|ATP10_YEAST	ATP10	Mitochondrial ATPase complex subunit ATP10	6	10.1675	9.3859	10.1583	12.4015	11.2322	11.7621	6.05407	5.53808	5.61841	5.73348	5.89775	6.05084
sp|P32453|ATP11_YEAST	ATP11	Protein ATP11, mitochondrial	16	6.44664	6.30309	6.77792	12.2322	12.1314	11.66	8.269	8.32376	8.52499	6.38126	6.43687	6.51281
sp|P22135|ATP12_YEAST	ATP12	Protein ATP12, mitochondrial	14	7.60394	7.42841	7.88148	9.39745	9.60215	9.5755	9.93562	9.83875	9.20384	6.50872	6.6878	6.33635
sp|Q12349|ATP14_YEAST	ATP14	ATP synthase subunit H, mitochondrial	6	9.03157	11.3526	9.58035	16.6852	18.7398	14.8344	3.0175	2.95581	4.70057	2.79361	3.23304	3.07553
sp|P21306|ATP5E_YEAST	ATP15	ATP synthase subunit epsilon, mitochondrial	16	10.8598	10.8095	10.5469	13.775	12.6477	13.6955	5.12716	5.26641	4.93621	4.05932	3.99785	4.27872
sp|Q12165|ATPD_YEAST	ATP16	ATP synthase subunit delta, mitochondrial	6	11.7014	9.67863	9.96128	13.3797	12.8187	11.4947	5.50215	5.81967	5.85584	4.18469	4.74207	4.8612
sp|Q06405|ATPK_YEAST	ATP17	ATP synthase subunit f, mitochondrial	13	14.3506	14.4532	14.4508	10.7219	10.5408	11.2365	5.11228	4.6528	5.33166	3.06949	3.05802	3.02199
sp|P81450|ATP18_YEAST	ATP18	ATP synthase subunit J, mitochondrial	2	14.0582	15.1052	14.2131	10.2731	10.5955	10.0705	4.72586	5.29999	4.75782	3.3976	3.32928	4.17392
sp|P81451|ATP19_YEAST	ATP19	ATP synthase subunit K, mitochondrial	6	13.1132	12.6547	12.9882	8.80786	8.35275	9.12331	7.06867	7.21286	7.36924	4.3584	4.51752	4.43327
sp|P00830|ATPB_YEAST	ATP2	ATP synthase subunit beta, mitochondrial	47	10.4663	9.97054	10.1009	15.9165	15.6477	14.9919	3.96536	3.88645	4.30018	3.5012	3.503	3.75007
sp|Q12233|ATPN_YEAST	ATP20	ATP synthase subunit g, mitochondrial	6	13.6315	14.3418	14.4115	10.4114	10.8085	11.0148	5.19395	5.33659	5.45095	3.04378	3.14557	3.20972
sp|P50273|ATP22_YEAST	ATP22	Mitochondrial translation factor ATP22	3	9.87817	8.85213	9.18391	9.18186	8.43088	8.82576	9.02272	8.61337	8.21688	6.36118	6.4487	6.98444
sp|P53722|ATP23_YEAST	ATP23	Mitochondrial inner membrane protease ATP23	3	9.29697	9.58934	9.91639	8.51322	8.46441	8.76963	9.30282	9.12604	8.99776	6.05628	6.00911	5.95804
sp|Q03153|ATP25_YEAST	ATP25	ATPase synthesis protein 25, mitochondrial	4	8.63702	9.04039	9.03656	10.1226	9.04567	9.21424	9.37305	9.10544	9.29652	5.37505	5.90175	5.85172
sp|P38077|ATPG_YEAST	ATP3	ATP synthase subunit gamma, mitochondrial	30	10.3186	10.5857	10.5982	15.1841	14.5198	15.2544	4.26281	4.30019	4.40245	3.62502	3.49198	3.45664
sp|P05626|ATPF_YEAST	ATP4	ATP synthase subunit 4, mitochondrial	32	14.3212	14.1744	14.2151	9.74865	9.96877	10.1132	5.60893	5.83336	5.75156	3.35513	3.42479	3.48483
sp|P09457|ATPO_YEAST	ATP5	ATP synthase subunit 5, mitochondrial	29	11.8324	11.6645	11.8362	12.8844	12.5624	13.1138	5.03503	5.05071	5.33642	3.55333	3.55266	3.57815
sp|P00854|ATP6_YEAST	ATP6	ATP synthase subunit a	2	9.05037	9.54181	11.1815	12.3866	11.4453	11.8837	5.55797	4.67827	5.68138	5.69802	6.50725	6.3877
sp|P30902|ATP7_YEAST	ATP7	ATP synthase subunit d, mitochondrial	25	13.558	13.1172	13.2258	10.0833	9.70273	10.1433	6.15286	5.99747	6.19683	3.95287	4.02072	3.84878
sp|P13090|ATR1_YEAST	ATR1	Aminotriazole resistance protein	1	9.42555	11.0625	10.3132	2.30662	2.17638	2.63131	13.9804	14.0941	14.6523	5.72552	6.08569	7.54627
sp|P31386|ATS1_YEAST	ATS1	Protein KTI13	2	6.6813	7.28645	6.17553	9.42949	10.0304	9.35312	7.93937	8.12057	7.66483	8.77496	9.07232	9.47163
sp|P38636|ATX1_YEAST	ATX1	Metal homeostasis factor ATX1	1	9.26773	8.10165	8.97281	9.81831	9.65136	9.42113	7.04701	6.23069	7.73286	7.31775	7.8336	8.6051
sp|P36107|AUR1_YEAST	AUR1	Inositol phosphorylceramide synthase catalytic subunit AUR1	1	3.34671	2.62336	2.88251	4.21805	4.39683	4.256	12.5521	12.6255	11.4498	14.4006	14.0293	13.2193
sp|Q12500|AVL9_YEAST	AVL9	Late secretory pathway protein AVL9	17	7.6507	7.74893	7.8138	8.18781	8.29818	8.44867	8.17706	7.88393	7.86508	9.3317	9.39681	9.19732
sp|Q08236|AVO1_YEAST	AVO1	Target of rapamycin complex 2 subunit AVO1	4	7.36074	6.62042	7.20766	8.83939	9.36115	8.74296	8.30639	7.60195	7.9943	9.562	9.51703	8.88601
sp|Q04749|AVO2_YEAST	AVO2	Target of rapamycin complex 2 subunit AVO2	1	5.68209	9.17193	8.72739	11.8303	10.1542	9.75865	6.54792	7.27096	6.3153	7.06928	11.6394	5.83265
sp|P47082|AVT1_YEAST	AVT1	Vacuolar amino acid transporter 1	9	7.93631	7.80155	7.97883	5.18504	5.09786	5.35755	9.11297	8.58419	9.64287	11.1677	10.9165	11.2186
sp|P39981|AVT2_YEAST	AVT2	Vacuolar amino acid transporter 2	1	13.4941	15.7503	16.7533	5.22327	5.64248	6.22734	6.20531	6.09797	7.118	5.53494	5.52979	6.42315
sp|P36062|AVT3_YEAST	AVT3	Vacuolar amino acid transporter 3	6	13.8442	15.5151	15.002	5.88629	6.36336	6.89559	6.05664	6.41196	6.71843	5.94052	5.59971	5.76615
sp|P50944|AVT4_YEAST	AVT4	Vacuolar amino acid transporter 4	4	11.4507	10.9982	11.8198	4.735	4.20393	4.36485	9.93723	8.98314	10.8814	7.47055	7.17025	7.98494
sp|P38176|AVT5_YEAST	AVT5	Vacuolar amino acid transporter 5	1	9.79035	9.25461	9.16768	7.4276	7.98663	7.28995	7.62035	8.55311	8.64081	8.29609	7.40985	8.56297
sp|P40074|AVT6_YEAST	AVT6	Vacuolar amino acid transporter 6	1	14.6801	16.84	15.9657	7.695	7.35316	8.40078	5.2554	5.30147	6.00886	3.85468	4.24475	4.40016
sp|P40501|AVT7_YEAST	AVT7	Vacuolar amino acid transporter 7	1	16.138	17.4135	17.211	5.48042	5.98499	6.5488	5.98501	6.02099	5.16857	4.36547	4.95594	4.72729
sp|P40851|AXL1_YEAST	AXL1	Putative protease AXL1	2	5.04007	5.95477	5.7556	5.94194	6.64653	6.71835	11.248	11.0012	10.2869	10.1864	10.8337	10.3865
sp|P38928|AXL2_YEAST	AXL2	Axial budding pattern protein 2	8	2.36445	2.40148	2.3492	1.43298	1.57217	1.68052	18.3324	17.6154	18.1016	11.4906	11.0253	11.6339
sp|P40471|AYR1_YEAST	AYR1	NADPH-dependent 1-acyldihydroxyacetone phosphate reductase	24	13.221	12.2666	12.8356	11.7021	11.226	11.2993	4.85048	4.61784	5.25794	4.17822	4.28975	4.25517
sp|P41696|AZF1_YEAST	AZF1	Asparagine-rich zinc finger protein AZF1	3	12.9439	10.6072	11.3039	11.1214	9.84708	8.07661	4.70498	5.07241	4.7036	7.41722	7.28204	6.91958
sp|P38084|BAP2_YEAST	BAP2	Leu/Val/Ile amino-acid permease	6	12.333	14.075	14.0285	2.49743	2.65673	2.98001	10.8343	10.7805	10.8856	6.66562	6.12664	6.13665
sp|P41815|BAP3_YEAST	BAP3	Valine amino-acid permease	5	8.58752	8.38414	9.49874	2.34553	2.54374	2.76469	15.8228	16.0564	15.3034	6.32686	6.28357	6.08259
sp|P12630|BAR1_YEAST	BAR1	Barrierpepsin	4	12.6235	12.4681	11.9968	0.735827	0.62972	1.18191	18.9893	18.5887	19.9823	0.590851	0.896839	1.31628
sp|P22035|BAS1_YEAST	BAS1	Myb-like DNA-binding protein BAS1	5	6.23789	6.19179	6.07437	5.22002	5.33338	5.30143	10.8311	10.8494	11.4398	10.9396	10.471	11.1104
sp|P38891|BCA1_YEAST	BAT1	Branched-chain-amino-acid aminotransferase, mitochondrial	18	10.1277	9.62339	9.81939	5.0708	5.02271	5.37178	11.2402	11.3171	10.9794	6.91679	7.08618	7.42455
sp|P47176|BCA2_YEAST	BAT2	Branched-chain-amino-acid aminotransferase, cytosolic	21	10.3081	10.2394	10.389	11.2472	11.0479	10.8288	5.4964	5.43554	5.7571	6.37098	6.40883	6.47075
sp|P47068|BBC1_YEAST	BBC1	Myosin tail region-interacting protein MTI1	46	7.61622	7.61769	7.64371	9.46015	9.87539	9.81615	7.71451	7.71212	7.94625	8.20026	8.32836	8.06919
sp|Q12365|BBP1_YEAST	BBP1	Spindle pole component BBP1	3	6.85246	9.24017	6.94632	6.92817	6.95616	6.48106	7.50342	12.3688	8.14237	9.9486	9.24406	9.38846
sp|P38772|BCD1_YEAST	BCD1	Box C/D snoRNA protein 1	2	3.26753	3.02336	3.27517	6.27415	6.18798	6.26825	11.6726	11.7189	11.4493	12.0958	12.3495	12.4175
sp|Q05029|BCH1_YEAST	BCH1	Protein BCH1	21	8.80263	8.57862	8.58073	8.25021	8.1686	8.24967	7.82367	7.56851	7.79958	8.49217	8.59314	9.09247
sp|P36122|BCH2_YEAST	BCH2	Protein BCH2	7	11.0472	11.8989	11.9519	7.12739	6.79594	6.97177	7.75671	7.30146	7.33655	7.59477	7.12348	7.09392
sp|Q01389|BCK1_YEAST	BCK1	Serine/threonine-protein kinase BCK1/SLK1/SSP31	7	5.44335	5.51332	6.0641	6.9124	7.1646	7.09926	8.84109	8.8228	8.7237	11.6112	12.1542	11.65
sp|P33306|BCK2_YEAST	BCK2	Protein BCK2	2	3.50775	5.34521	5.69664	9.14003	7.11447	6.75543	10.1984	10.2455	11.5729	10.4236	8.54386	11.4562
sp|Q06338|BCP1_YEAST	BCP1	Protein BCP1	18	4.9204	4.87523	4.94226	6.29153	6.43017	6.22129	10.8932	10.6072	11.0693	10.269	11.2449	12.2354
sp|P32839|BCS1_YEAST	BCS1	Mitochondrial chaperone BCS1	10	11.7492	11.6839	11.3852	6.01784	5.93085	6.15968	10.6089	10.4427	10.6276	5.10498	5.17815	5.11095
sp|P07278|KAPR_YEAST	BCY1	cAMP-dependent protein kinase regulatory subunit	30	14.5255	14.5787	14.3482	8.53955	8.40467	8.57076	5.39599	5.52715	5.62185	4.76921	4.82546	4.89292
sp|P35817|BDF1_YEAST	BDF1	Bromodomain-containing factor 1	19	6.51782	6.46822	6.41546	7.50837	7.7434	7.88626	8.53204	8.53794	7.80865	11.0885	10.97	10.5233
sp|Q07442|BDF2_YEAST	BDF2	Bromodomain-containing factor 2	4	4.02128	3.80388	4.08864	4.21682	4.2725	3.90556	8.40075	8.43014	7.6187	16.6766	17.2315	17.3336
sp|P39714|BDH1_YEAST	BDH1	(R,R)-butanediol dehydrogenase	14	10.6271	10.5149	10.6616	12.4083	12.3397	12.4216	4.66739	4.45475	5.06115	5.39621	5.78531	5.66207
sp|P39713|BDH2_YEAST	BDH2	Probable diacetyl reductase [(R)-acetoin forming] 2	6	7.50007	7.10871	7.51678	18.8048	18.3916	19.5503	1.42558	1.24308	1.26269	5.50675	5.73849	5.9512
sp|P46678|TFC5_YEAST	BDP1	Transcription factor TFIIIB component B''	4	4.10773	4.77641	4.07709	5.91744	6.76006	6.41408	10.3168	9.2019	8.93058	13.4952	13.1063	12.8964
sp|P29366|BEM1_YEAST	BEM1	Bud emergence protein 1	13	9.25849	9.75051	9.5999	7.25027	7.53517	7.27873	8.64805	8.09353	8.30356	8.10376	8.24135	7.93668
sp|P39960|BEM2_YEAST	BEM2	GTPase-activating protein BEM2/IPL2	32	6.64845	6.59126	6.69788	8.29925	8.36495	8.12088	8.04966	7.76489	8.00319	10.491	10.5247	10.4438
sp|P32873|BEM3_YEAST	BEM3	GTPase-activating protein BEM3	16	5.31674	5.54082	5.53487	5.14511	6.27594	5.62642	10.9104	10.6697	9.97762	12.0142	12.163	10.8253
sp|P39011|BEM4_YEAST	BEM4	Bud emergence protein 4	12	9.77418	10.4867	10.6736	7.4826	7.59661	7.97752	8.38084	8.34632	8.27954	6.92357	6.96134	7.11718
sp|Q06688|SRR1L_YEAST	BER1	SRR1-like protein BER1	6	6.69113	6.85801	7.17127	7.6309	8.35698	7.98235	10.1509	9.52583	9.33904	8.78132	8.50552	9.00672
sp|P22804|BET1_YEAST	BET1	Protein transport protein BET1	5	5.46257	5.54922	5.50102	7.41121	6.69832	5.80653	10.4271	9.84233	11.5328	10.319	10.3122	11.1377
sp|P20133|PGTB2_YEAST	BET2	Geranylgeranyl transferase type-2 subunit beta	8	9.64673	10.2408	10.3022	8.51427	8.52811	8.15333	8.26418	8.08926	7.28804	6.70976	7.19778	7.06547
sp|P36149|BET3_YEAST	BET3	Trafficking protein particle complex subunit BET3	3	8.38239	8.68271	8.05369	5.86469	7.08416	6.9598	8.78761	9.63576	8.70789	9.33271	8.6526	9.85599
sp|Q00618|PGTA_YEAST	BET4	Geranylgeranyl transferase type-2 subunit alpha	13	8.73863	9.29591	9.53552	8.18556	8.83375	8.62086	7.93409	8.19505	7.49915	7.84583	7.83213	7.48349
sp|Q03630|BET5_YEAST	BET5	Trafficking protein particle complex subunit BET5	3	8.18469	9.07363	8.5998	6.62052	6.90883	6.436	8.59597	8.87145	9.69202	9.59701	9.56372	7.85635
sp|P47113|BFA1_YEAST	BFA1	Mitotic check point protein BFA1	3	6.55368	6.76125	6.52156	6.3433	7.28561	5.51569	9.70684	10.0491	10.4304	10.4911	10.2534	10.0881
sp|P38934|BFR1_YEAST	BFR1	Nuclear segregation protein BFR1	36	5.57805	5.59656	5.57778	6.55875	6.71245	6.86246	10.6763	11.0527	10.5869	10.5606	10.2349	10.0025
sp|Q06631|BFR2_YEAST	BFR2	Protein BFR2	19	4.00734	3.93357	3.97565	4.63607	4.69805	4.67019	11.3687	10.9942	11.3311	13.3226	13.6665	13.396
sp|P15703|BGL2_YEAST	BGL2	Glucan 1,3-beta-glucosidase	32	12.0768	11.9843	12.0494	10.7879	10.3927	10.7309	5.55904	5.76827	5.6816	5.07104	4.99447	4.90349
sp|P38813|BIG1_YEAST	BIG1	Protein BIG1	5	6.06998	5.48555	6.17907	13.8019	14.2632	13.438	6.7215	6.31107	6.26568	6.36179	7.82108	7.28117
sp|P11709|BIK1_YEAST	BIK1	Nuclear fusion protein BIK1	9	6.59258	6.49293	6.29223	6.32385	6.41656	6.58704	10.5855	10.6934	10.3941	9.91627	9.88241	9.82319
sp|P40013|BIM1_YEAST	BIM1	Protein BIM1	10	4.84305	5.2412	5.18385	7.32376	7.75466	7.61043	9.61808	9.79531	9.14445	10.923	11.3557	11.2065
sp|P32451|BIOB_YEAST	BIO2	Biotin synthase, mitochondrial	7	1.28665	1.16136	1.287	11.4141	11.3686	11.8782	10.734	11.0331	10.8308	9.36614	9.60191	10.0381
sp|P50277|BIOA_YEAST	BIO3	Adenosylmethionine-8-amino-7-oxononanoate aminotransferase	1	8.79319	11.0309	6.44488	8.08048	8.09436	6.18737	8.08012	9.91507	7.49997	10.0413	9.03356	6.79879
sp|P53630|BIOD_YEAST	BIO4	Dethiobiotin synthetase	1	3.38146	3.33778	2.98436	8.13506	12.0597	8.29319	7.88403	11.6308	12.0668	6.99086	8.03543	15.2005
sp|P47134|BIR1_YEAST	BIR1	Protein BIR1	2	5.80502	6.20334	5.96626	8.11191	8.3233	8.95759	8.9933	9.03205	8.66819	10.1543	9.71277	10.072
sp|P35727|BLI1_YEAST	BLI1	Biogenesis of lysosome-related organelles complex 1 subunit BLI1	4	7.1969	7.80068	7.38935	7.88966	7.75599	7.77707	9.02847	8.89135	9.02595	9.46005	8.83762	8.94691
sp|P43583|BLM10_YEAST	BLM10	Proteasome activator BLM10	23	8.44924	8.5946	8.63082	7.80018	7.91172	8.02943	6.57407	6.10963	6.08052	10.7087	10.6092	10.5018
sp|P29311|BMH1_YEAST	BMH1	Protein BMH1	8	8.58925	8.54487	8.71684	9.35023	9.04623	9.10977	7.57045	7.59934	7.442	8.27443	7.89144	7.86517
sp|P34730|BMH2_YEAST	BMH2	Protein BMH2	7	10.411	9.44904	10.4493	13.8359	11.9108	11.6703	5.1643	4.94883	5.88257	5.19856	5.06194	6.01743
sp|Q08965|BMS1_YEAST	BMS1	Ribosome biogenesis protein BMS1	23	4.55412	4.55405	4.49912	4.00989	4.30221	4.16123	12.3282	12.0203	12.3362	12.8138	12.3476	12.0732
sp|P38278|BMT2_YEAST	BMT2	25S rRNA (adenine(2142)-N(1))-methyltransferase	2	2.84128	2.68473	3.26814	4.17492	3.25452	3.77781	13.9621	13.8903	14.1937	13.0818	12.2502	12.6205
sp|P40493|BMT5_YEAST	BMT5	25S rRNA (uridine(2634)-N(3))-methyltransferase	5	6.1916	6.09208	6.02695	6.12833	6.00178	6.1654	10.5018	10.1856	11.1711	11.0284	9.83295	10.674
sp|Q12291|BMT6_YEAST	BMT6	25S rRNA (uridine(2843)-N(3))-methyltransferase	6	4.41216	4.69552	4.15741	5.35985	5.27968	5.37942	11.8996	11.5468	11.6427	11.8892	12.0681	11.6696
sp|P47096|3HAO_YEAST	BNA1	3-hydroxyanthranilate 3,4-dioxygenase	15	14.8172	14.7839	14.1784	7.8647	7.53095	7.8351	7.29208	7.5774	7.43944	3.60254	3.55274	3.52554
sp|P47125|I23O_YEAST	BNA2	Indoleamine 2,3-dioxygenase	5	19.8487	21.1202	21.6992	6.25048	6.49056	6.5768	4.1827	4.6061	4.19597	1.65459	1.68736	1.68735
sp|P47039|BNA3_YEAST	BNA3	Probable kynurenine--oxoglutarate transaminase BNA3	16	14.2933	14.6226	14.6948	6.27405	6.66487	6.87793	6.48	6.77503	6.28379	5.68857	5.58392	5.76116
sp|P38169|KMO_YEAST	BNA4	Kynurenine 3-monooxygenase	15	12.4431	13.4791	13.1484	9.04256	9.11089	9.3735	5.85822	5.76816	5.59411	5.66422	5.37646	5.14124
sp|Q05979|KYNU_YEAST	BNA5	Kynureninase	16	12.7705	12.5636	12.5231	10.7088	11.2413	11.6574	3.77394	3.70078	3.72003	5.92556	5.55695	5.858
sp|P43619|NADC_YEAST	BNA6	Nicotinate-nucleotide pyrophosphorylase [carboxylating]	10	10.8927	10.4928	10.2827	11.8903	11.7455	12.1038	4.77686	4.56888	4.75174	6.15197	6.03265	6.31021
sp|Q04066|KFA_YEAST	BNA7	Kynurenine formamidase	12	8.1996	8.05752	7.95362	6.84491	7.44597	7.13129	11.3196	11.5623	11.0962	6.4264	6.99633	6.96622
sp|P41832|BNI1_YEAST	BNI1	Protein BNI1	20	6.05336	5.75395	6.03664	7.38948	7.80603	7.67112	8.51023	8.24489	8.11216	11.5615	11.57	11.2907
sp|P53858|BNI4_YEAST	BNI4	Protein BNI4	10	4.49345	4.77208	4.66482	4.95417	5.0407	4.92389	12.2786	12.1128	12.0577	11.1594	11.9199	11.6223
sp|P53890|BNI5_YEAST	BNI5	Bud neck protein 5	20	3.39857	3.43008	3.60224	5.34621	5.171	5.27631	11.3742	11.3617	12.1088	12.8583	13.0743	12.9983
sp|P40450|BNR1_YEAST	BNR1	BNI1-related protein 1	4	5.31676	4.6156	4.84168	5.63191	5.14336	5.54737	12.1171	10.1232	9.76377	12.4692	13.6783	10.7518
sp|P38041|BOB1_YEAST	BOI1	Protein BOB1	15	5.23289	5.29619	5.4093	5.57572	5.3713	5.74184	11.0961	10.8971	11.6527	11.17	11.693	10.8639
sp|P39969|BOI2_YEAST	BOI2	Protein BOI2	17	7.72546	8.14644	7.93489	7.81102	7.77936	8.09296	7.91746	8.38064	7.49316	9.4613	9.69114	9.56617
sp|Q3E793|BOL1_YEAST	BOL1	BolA-like protein 1	1	3.96319	5.20414	6.516	8.7972	9.71598	8.86904	9.53912	9.81729	7.48737	7.90824	12.1076	10.0748
sp|P39724|BOL3_YEAST	BOL3	BolA-like protein 3	3	4.56949	4.66682	4.52576	11.4769	11.4098	11.0714	8.58485	8.79873	8.8088	8.61293	8.65343	8.82109
sp|P53838|BOR1_YEAST	BOR1	Boron transporter 1	2	9.00425	7.89152	8.63052	4.91597	4.68818	5.69391	9.08158	9.20568	8.4533	11.6687	10.761	10.0054
sp|P25385|BOS1_YEAST	BOS1	Protein transport protein BOS1	5	8.96998	8.94259	9.15842	6.90282	6.95483	6.9725	9.01666	9.04247	8.6994	8.69716	8.4648	8.17837
sp|P25356|BPH1_YEAST	BPH1	Beige protein homolog 1	8	13.2652	14.7539	14.4823	6.87071	7.57766	7.39339	6.09553	6.70123	5.69483	5.76694	5.55048	5.84787
sp|P48445|BPL1_YEAST	BPL1	Biotin--protein ligase	17	7.21225	7.76226	7.65323	8.61463	8.61678	8.67987	8.44997	8.3818	7.94596	9.06142	8.82642	8.7954
sp|P14772|BPT1_YEAST	BPT1	Bile pigment transporter 1	18	13.6641	13.5338	13.7086	5.6113	6.19728	6.17769	6.69878	6.8236	6.28215	7.1246	6.98898	7.18908
sp|Q07457|BRE1_YEAST	BRE1	E3 ubiquitin-protein ligase BRE1	19	5.55473	5.37302	5.35206	5.87358	5.9426	5.77788	11.2354	11.4532	11.4155	10.5734	10.9095	10.5392
sp|P43132|BRE2_YEAST	BRE2	COMPASS component BRE2	7	7.57511	8.01645	8.15337	7.6369	7.82307	7.73633	8.12217	8.2028	8.57393	9.3129	9.34761	9.49936
sp|P53741|BRE5_YEAST	BRE5	UBP3-associated protein BRE5	17	5.03406	4.75374	4.85562	6.03125	6.08411	6.14755	10.1463	10.3127	10.5177	11.971	12.2632	11.8827
sp|P29056|TF3B_YEAST	BRF1	Transcription factor IIIB 70 kDa subunit	8	4.26452	4.30849	3.82363	4.88761	6.10207	5.39027	10.5255	11.12	9.82495	13.4563	13.6877	12.6091
sp|P38770|BRL1_YEAST	BRL1	Nucleus export protein BRL1	1	4.53478	5.47482	5.32813	5.72955	5.69354	4.7979	10.8837	11.8905	11.3495	10.6238	12.3367	11.3571
sp|P38170|CND2_YEAST	BRN1	Condensin complex subunit 2	6	3.76052	4.56799	4.16975	6.93963	6.52629	7.4233	10.8674	9.71713	10.1881	11.9875	12.2847	11.5678
sp|P48582|BRO1_YEAST	BRO1	Vacuolar-sorting protein BRO1	29	8.38246	8.68782	8.66476	10.2412	10.3934	10.3518	7.15453	7.16275	6.69555	7.54884	7.43763	7.27927
sp|Q99177|BRR1_YEAST	BRR1	Pre-mRNA-splicing factor BRR1	1	2.97489	4.31545	3.91056	9.71597	10.188	9.0718	9.93356	7.81273	9.68275	11.9334	10.6007	9.86022
sp|P32639|BRR2_YEAST	BRR2	Pre-mRNA-splicing helicase BRR2	21	7.78178	7.70836	7.71381	7.51903	7.92522	7.86726	7.92418	8.00628	7.35587	10.1711	10.1374	9.88976
sp|Q08235|BRX1_YEAST	BRX1	Ribosome biogenesis protein BRX1	10	4.58069	4.20222	4.37857	5.19214	4.74152	4.51635	12.094	11.0885	13.7586	10.4032	11.489	13.5553
sp|Q05611|BSC2_YEAST	BSC2	Bypass of stop codon protein 2	3	14.5252	15.5494	15.6785	12.4636	12.7777	12.7641	2.69968	2.90508	2.69392	2.70837	2.79096	2.44347
sp|P38356|BSD2_YEAST	BSD2	Metal homeostatis protein BSD2	1	4.39616	4.16642	4.56229	3.75728	3.43236	3.39857	15.2837	14.6659	17.0185	9.22204	9.79895	10.2979
sp|Q06604|BSP1_YEAST	BSP1	Protein BSP1	10	5.99068	6.02272	6.16645	6.48882	6.47275	6.75592	9.48091	9.31754	9.6154	11.4346	10.9347	11.3195
sp|P43571|BST1_YEAST	BST1	GPI inositol-deacylase	5	8.41447	8.73163	8.8408	7.92242	8.09605	7.9214	8.24479	8.05787	7.92884	8.79238	8.5985	8.45084
sp|Q12051|GGPPS_YEAST	BTS1	Geranylgeranyl pyrophosphate synthase	5	8.57154	8.66688	8.8006	7.2277	7.18762	7.34868	8.90128	8.59217	8.73756	8.30561	8.65471	9.00564
sp|P40314|NACB2_YEAST	BTT1	Nascent polypeptide-associated complex subunit beta-2	2	4.44153	3.24711	4.22236	2.49499	3.05696	3.35852	16.7562	15.2685	19.208	8.10806	8.65813	11.1796
sp|P26448|BUB2_YEAST	BUB2	Mitotic check point protein BUB2	2	6.95301	7.63184	7.14537	7.26472	6.36248	7.69486	9.39383	10.6319	9.29364	8.86313	9.08442	9.68084
sp|P26449|BUB3_YEAST	BUB3	Cell cycle arrest protein BUB3	6	6.44836	7.02736	6.4402	6.06728	6.31301	6.73346	12.5895	12.1994	11.7637	7.72634	8.93991	7.75149
sp|P46947|CWC26_YEAST	BUD13	Pre-mRNA-splicing factor CWC26	6	7.14582	7.26557	7.61779	6.97544	7.0646	7.43468	9.79769	9.28002	9.89711	9.29407	8.99395	9.23325
sp|P27637|BUD14_YEAST	BUD14	Bud site selection protein 14	12	5.97837	5.34597	5.9808	7.19811	7.34463	7.1107	8.93497	9.07028	9.7688	10.9129	10.7893	11.5652
sp|P39988|BUD16_YEAST	BUD16	Putative pyridoxal kinase BUD16	2	7.75414	8.37048	8.0814	7.28099	7.98787	7.64097	9.32129	10.2141	8.57831	7.94106	8.12426	8.70514
sp|P53727|BUD17_YEAST	BUD17	Putative pyridoxal kinase BUD17	4	7.6017	7.73235	7.51589	6.41864	6.74984	6.9182	11.3364	11.1394	9.10203	8.91163	8.63108	7.94285
sp|P33314|BUD2_YEAST	BUD2	Inhibitory regulator protein BUD2/CLA2	6	6.57455	6.717	6.80988	6.78679	8.42838	7.93761	9.14581	9.30736	8.54101	10.1742	9.6531	9.9243
sp|Q08004|BUD20_YEAST	BUD20	Bud site selection protein 20	5	0.935153	1.15699	1.0085	1.18207	1.35691	1.47034	15.8846	16.0991	16.3839	14.5777	14.5037	15.4409
sp|Q08492|BUD21_YEAST	BUD21	Bud site selection protein 21	3	3.94306	3.96887	3.88548	2.98105	3.34677	2.81373	13.5498	13.7893	14.1934	12.435	13.55	11.5435
sp|Q04347|BUD22_YEAST	BUD22	Bud site selection protein 22	7	5.0301	4.82273	4.92823	5.6959	5.62512	5.50942	12.2093	11.6455	12.4629	10.6418	10.8496	10.5794
sp|P25627|BUD23_YEAST	BUD23	18S rRNA (guanine(1575)-N(7))-methyltransferase	4	3.12696	3.32187	3.31587	3.94213	4.81591	3.93515	14.6173	13.5643	12.336	12.578	12.5648	11.8817
sp|P43573|BUD27_YEAST	BUD27	Bud site selection protein 27	17	4.36453	4.46475	4.95443	6.41719	6.70296	6.56065	8.18901	8.51563	7.83899	14.092	14.2119	13.6879
sp|P25558|BUD3_YEAST	BUD3	Bud site selection protein 3	26	3.74432	3.52694	3.86414	3.97124	4.31681	4.04645	12.9217	12.5984	12.2056	12.9891	12.8223	12.9931
sp|P25337|BUD31_YEAST	BUD31	Pre-mRNA-splicing factor BUD31	1	5.52802	6.47839	5.82573	9.90513	10.8286	10.2258	9.1019	8.53619	8.08136	9.13878	7.09899	9.25113
sp|P53323|BUD32_YEAST	BUD32	EKC/KEOPS complex subunit BUD32	4	9.09297	8.41164	8.51469	6.86764	6.79716	6.44943	9.76367	9.42642	8.41159	8.72131	8.72836	8.81512
sp|P47136|BUD4_YEAST	BUD4	Bud site selection protein 4	5	5.85838	5.87169	6.16301	7.49084	6.97746	7.29903	6.46708	7.17423	6.66504	13.2004	13.4872	13.3456
sp|P25300|BUD5_YEAST	BUD5	Bud site selection protein 5	1	16.4913	16.5749	13.8138	7.09029	7.26294	5.45827	8.53479	6.24413	5.60901	3.07847	6.4096	3.43253
sp|P41697|BUD6_YEAST	BUD6	Bud site selection protein 6	13	7.69725	7.84013	8.11125	8.17442	8.384	8.30297	8.27146	8.57986	8.26677	8.59089	8.78565	8.99535
sp|Q08754|BUD7_YEAST	BUD7	Bud site selection protein 7	7	9.53964	9.55273	9.38587	7.25348	7.74821	7.26613	8.70848	8.23449	8.30477	8.199	7.84923	7.95796
sp|P41698|BUD8_YEAST	BUD8	Bud site selection protein 8	3	12.4746	12.6505	13.1959	9.17021	8.21351	7.94097	5.94664	5.5202	6.28264	6.58893	5.82213	6.19379
sp|P53226|BUD9_YEAST	BUD9	Bud site selection protein 9	5	6.51724	6.24712	6.83889	4.50165	4.3982	4.17555	11.0081	12.0152	12.0182	10.8132	10.5782	10.8885
sp|Q12191|BUG1_YEAST	BUG1	Binder of USO1 and GRH1 protein 1	14	5.31326	5.67452	5.5739	7.6764	8.10246	8.40851	9.77155	10.4426	9.83657	9.82294	9.74353	9.6337
sp|P48524|BUL1_YEAST	BUL1	Ubiquitin ligase-binding protein BUL1	14	6.48577	6.45991	6.6711	7.2048	7.35919	7.45958	9.43315	9.02609	8.65417	10.3636	10.7185	10.1641
sp|Q03758|BUL2_YEAST	BUL2	Ubiquitin ligase-binding protein BUL2	9	6.16244	6.12632	6.57417	4.35632	4.44784	4.4934	11.6086	11.4228	12.183	10.4964	11.3342	10.7945
sp|Q05949|BUR2_YEAST	BUR2	Protein BUR2	6	8.1776	8.56713	7.87882	7.68871	7.37457	7.57745	9.45953	9.34378	8.39946	8.67981	8.43939	8.41375
sp|P40096|NCB1_YEAST	BUR6	Negative cofactor 2 complex subunit alpha	5	6.56776	6.40059	7.05216	8.00364	7.83638	7.38526	9.90063	9.71881	9.54328	9.09655	9.25111	9.24382
sp|P48558|BXI1_YEAST	BXI1	Bax inhibitor 1	1	5.208	5.14697	4.77149	10.3312	9.61174	9.47321	10.2144	9.43943	8.56774	9.45967	8.45355	9.32263
sp|P36106|BYE1_YEAST	BYE1	Transcription factor BYE1	8	8.5701	8.76303	8.69965	6.18564	6.43525	6.20818	8.11746	8.30228	8.35542	9.90465	10.5538	9.90451
sp|P38822|BZZ1_YEAST	BZZ1	Protein BZZ1	16	7.92539	7.57759	8.01325	8.61739	8.27919	7.93614	7.91608	7.91723	7.89521	9.41525	9.19189	9.31539
sp|Q04430|PANK_YEAST	CAB1	Pantothenate kinase CAB1	11	10.0812	10.5769	10.5375	5.53217	5.5582	5.71416	9.44963	9.80294	9.36097	7.52992	7.79436	8.06211
sp|P40506|PPCS_YEAST	CAB2	Phosphopantothenate--cysteine ligase CAB2	14	15.0312	14.5736	14.3508	7.05472	6.812	7.0697	6.49049	6.37942	6.35685	5.05018	5.18844	5.64265
sp|P36076|CAB3_YEAST	CAB3	Coenzyme A biosynthesis protein 3	16	7.26462	7.31705	7.6383	9.36207	9.29454	9.55179	8.22005	7.88116	8.47811	8.2389	8.59585	8.15756
sp|P53332|COAD_YEAST	CAB4	Phosphopantetheine adenylyltransferase	9	8.89822	9.31939	9.00178	8.06251	8.86572	8.87342	7.92147	7.89258	7.83466	7.69693	7.86867	7.76464
sp|Q03941|CAB5_YEAST	CAB5	Dephospho-CoA kinase CAB5	4	7.82989	7.25697	7.44977	11.6298	12.379	12.0123	6.59679	6.71864	5.59306	7.40566	7.54048	7.58765
sp|Q04199|CAC2_YEAST	CAC2	Chromatin assembly factor 1 subunit p60	7	5.78796	5.79775	5.1342	6.4443	6.52332	6.30504	11.689	10.4864	10.1945	10.542	10.9167	10.1787
sp|P24813|AP2_YEAST	CAD1	AP-1-like transcription factor YAP2	1	3.53449	3.47066	3.26929	2.3055	2.22712	2.3564	14.7787	13.5113	13.3465	12.9408	13.807	14.4522
sp|P53836|CA120_YEAST	CAF120	CCR4-NOT transcriptional complex subunit CAF120	6	4.76491	4.94346	4.85165	7.27493	7.37801	7.44161	8.79324	8.47095	8.02161	12.6385	12.7499	12.6712
sp|P53280|CF130_YEAST	CAF130	Protein CAF130	9	7.06405	6.67104	7.10147	8.48688	8.36184	8.00526	9.1466	8.92733	8.68412	9.75367	9.29061	8.50712
sp|P43569|CAF16_YEAST	CAF16	CCR4-associated factor 16	12	6.88134	7.11823	6.93937	8.03383	8.51782	8.23774	9.69866	9.65839	9.985	8.21846	8.24485	8.46631
sp|P12962|CAF20_YEAST	CAF20	Cap-associated protein CAF20	2	0.804351	0.935871	1.33361	2.57166	3.03502	3.20781	10.3188	11.1133	12.2751	19.1548	18.3771	16.8726
sp|P36130|CAF4_YEAST	CAF4	CCR4-associated factor 4	7	5.95876	5.92545	5.66993	8.53183	8.43813	7.61923	8.25031	9.40134	7.84529	10.9601	10.8538	10.5458
sp|P53829|CAF40_YEAST	CAF40	Protein CAF40	3	8.32509	9.14257	9.53724	6.62985	6.29834	7.82025	9.64995	8.68494	9.15457	7.48877	7.8184	9.45005
sp|P39101|CAJ1_YEAST	CAJ1	Protein CAJ1	38	6.99787	7.07833	6.71002	9.75661	9.7658	9.86634	7.49531	7.65739	7.90946	8.83189	8.98984	8.94115
sp|P43568|CAK1_YEAST	CAK1	Serine/threonine-protein kinase CAK1	12	10.4013	10.3724	10.1108	9.03255	9.73899	9.2846	7.42781	7.05467	6.28354	7.01812	6.65682	6.61836
sp|P29547|EF1G1_YEAST	CAM1	Elongation factor 1-gamma 1	33	8.84523	8.32119	8.45957	12.6273	13.0201	12.5339	5.57843	5.29709	5.73068	6.5807	6.51638	6.48936
sp|P28495|CAPZA_YEAST	CAP1	F-actin-capping protein subunit alpha	11	7.19844	7.61793	8.02988	7.78753	7.44529	7.47892	10.1318	9.82867	10.0146	7.9754	8.24311	8.24846
sp|P13517|CAPZB_YEAST	CAP2	F-actin-capping protein subunit beta	20	8.13687	8.4229	7.81699	9.38374	9.38465	9.03818	8.31404	7.98206	7.67	7.74447	8.06226	8.04384
sp|P00812|ARGI_YEAST	CAR1	Arginase	23	4.80718	4.7352	4.78553	14.1996	14.8692	14.1334	4.92299	5.01582	5.17953	9.15413	9.0173	9.18011
sp|P07991|OAT_YEAST	CAR2	Ornithine aminotransferase	33	8.8652	8.88708	8.80844	13.0982	13.1586	13.1763	2.50698	2.47824	2.60315	8.673	8.86468	8.88019
sp|P32796|CACP_YEAST	CAT2	Carnitine O-acetyltransferase, mitochondrial	1	20.5733	20.9334	20.3318	7.00847	6.25611	6.40824	4.01584	3.52668	3.49519	2.50789	2.66303	2.27997
sp|P41735|COQ7_YEAST	CAT5	5-demethoxyubiquinone hydroxylase, mitochondrial	7	7.43309	6.62436	6.66105	19.2869	14.8789	15.2257	4.94637	4.38417	5.43	4.74625	4.68621	5.69706
sp|P39113|CAT8_YEAST	CAT8	Regulatory protein CAT8	11	12.6868	12.7239	13.3491	14.5975	14.9813	15.4716	2.52665	2.00343	2.59712	3.18313	3.03316	2.8463
sp|P53223|CAX4_YEAST	CAX4	Dolichyldiphosphatase	3	8.08043	8.86827	8.41667	5.95516	6.62883	8.2497	9.24771	10.265	9.1805	7.51695	9.63146	7.95935
sp|Q08920|NCBP2_YEAST	CBC2	Nuclear cap-binding protein subunit 2	7	7.11173	7.2926	8.22269	7.77201	8.03841	7.61202	9.0771	9.00659	8.92004	8.96815	9.07292	8.90574
sp|P17106|CBF1_YEAST	CBF1	Centromere-binding protein 1	14	5.64524	5.92882	5.60302	6.27513	6.38553	6.29632	10.8921	12.1445	11.1242	10.4046	9.8162	9.48424
sp|P32504|CBF3A_YEAST	CBF2	Centromere DNA-binding protein complex CBF3 subunit A	6	6.04897	6.38968	6.41272	7.72209	7.12213	7.32043	9.74465	9.93865	9.51519	9.71372	10.0796	9.99214
sp|P33322|CBF5_YEAST	CBF5	H/ACA ribonucleoprotein complex subunit CBF5	26	6.36008	6.53357	6.47882	5.68632	5.78781	5.82449	10.3699	10.3901	10.5677	10.7394	10.621	10.6409
sp|P53894|CBK1_YEAST	CBK1	Serine/threonine-protein kinase CBK1	7	8.03747	7.34597	7.75039	7.48716	7.02688	7.36911	9.19861	8.8956	9.60222	8.6912	9.20805	9.38734
sp|P07252|CBP1_YEAST	CBP1	Cytochrome B pre-mRNA-processing protein 1	1	7.28151	6.36701	7.55264	8.5188	8.97622	5.70968	9.36794	9.73357	10.8788	10.3043	5.89781	9.41174
sp|P03874|CBP2_YEAST	CBP2	Cytochrome B pre-mRNA-processing protein 2	7	11.2199	12.1271	11.9597	8.59919	9.2063	9.18943	7.1821	7.22158	6.9388	5.55774	5.60671	5.1914
sp|P21560|CBP3_YEAST	CBP3	Protein CBP3, mitochondrial	17	11.5759	12.1912	12.1794	8.72497	9.16617	9.19978	7.79536	7.76686	7.21124	4.66778	4.66999	4.85132
sp|P37267|CBP4_YEAST	CBP4	Assembly factor CBP4	2	15.0641	15.8875	16.0072	9.78973	9.83846	10.6314	4.31142	4.12991	4.40581	3.41656	3.1502	3.36779
sp|P07253|CBP6_YEAST	CBP6	Cytochrome B pre-mRNA-processing protein 6	10	11.9134	12.2132	12.3688	8.55358	8.61116	8.68705	7.94812	7.97377	7.78635	4.62235	4.65409	4.66825
sp|P38626|NCB5R_YEAST	CBR1	NADH-cytochrome b5 reductase 1	27	5.39706	5.39086	5.46497	9.85994	9.84112	9.39811	7.9692	7.59247	7.82252	10.3054	10.3051	10.6533
sp|P14066|CBS1_YEAST	CBS1	Cytochrome b translational activator protein CBS1, mitochondrial	2	8.82235	9.06637	8.77998	8.5111	8.65621	8.6653	8.08665	8.20395	9.20188	7.59801	6.61148	7.79671
sp|P14905|CBS2_YEAST	CBS2	Cytochrome B translational activator protein CBS2	1	8.16659	9.993	8.31744	8.56395	8.25526	7.92881	7.91235	11.8066	8.4063	7.31486	6.93293	6.40193
sp|P47818|CCC1_YEAST	CCC1	Protein CCC1	11	11.0813	11.2831	10.9994	6.7077	6.67735	6.72272	8.12619	7.84841	7.95645	7.4223	7.54202	7.63302
sp|P38995|ATU2_YEAST	CCC2	Copper-transporting ATPase	4	6.87554	7.72666	6.51163	6.5446	5.52874	5.86939	9.54923	10.4981	9.62791	10.614	10.4188	10.2354
sp|Q03702|CCE1_YEAST	CCE1	Cruciform cutting endonuclease 1, mitochondrial	2	8.84561	8.16012	8.12625	11.2453	11.6028	11.7822	5.8974	6.16897	6.85449	7.00024	7.22203	7.09459
sp|P50077|CCH1_YEAST	CCH1	Calcium-channel protein CCH1	9	10.0127	11.1293	11.5315	5.14553	5.67091	5.66199	9.12398	8.61611	8.8065	8.1237	8.17715	8.0005
sp|P37366|CCL1_YEAST	CCL1	Cyclin CCL1	4	7.24379	6.94087	7.07135	7.38847	7.57293	7.57517	9.45618	9.41419	9.3211	9.43064	9.57322	9.01207
sp|P48237|CCM1_YEAST	CCM1	Mitochondrial group I intron splicing factor CCM1	7	6.61365	6.66087	6.89902	6.16098	6.82983	7.30789	12.4832	12.8789	11.8756	7.47664	7.29002	7.52331
sp|P00431|CCPR_YEAST	CCP1	Cytochrome c peroxidase, mitochondrial	28	7.39711	6.99788	7.08203	17.8969	16.6719	15.4069	3.91218	3.58006	3.82115	5.74659	5.74009	5.74721
sp|P31384|CCR4_YEAST	CCR4	CCR4-Not complex 3'-5'-exoribonuclease subunit Ccr4	17	8.74852	9.25667	9.13999	8.15351	8.57547	8.3552	8.03761	8.05472	7.79416	7.87448	8.06734	7.94232
sp|P40202|CCS1_YEAST	CCS1	Superoxide dismutase 1 copper chaperone	6	6.80412	6.22478	6.09417	6.09327	5.75281	5.52168	10.0113	9.42525	11.2204	10.0279	10.6904	12.134
sp|P39076|TCPB_YEAST	CCT2	T-complex protein 1 subunit beta	28	5.08695	4.83432	4.89036	5.20391	4.93783	4.54143	11.8373	12.1333	11.6738	11.4434	11.646	11.7714
sp|P39077|TCPG_YEAST	CCT3	T-complex protein 1 subunit gamma	31	5.96859	5.86715	5.72523	6.15183	6.20586	5.99415	10.5446	10.1444	10.2539	11.2055	11.01	10.9289
sp|P39078|TCPD_YEAST	CCT4	T-complex protein 1 subunit delta	29	5.64015	5.58491	5.61121	6.07286	6.16535	6.02677	10.9409	10.8573	10.5011	10.5657	10.9948	11.0389
sp|P40413|TCPE_YEAST	CCT5	T-complex protein 1 subunit epsilon	26	5.0447	5.04848	4.88353	5.15882	5.2953	5.1695	10.9291	11.1771	10.8405	12.3544	11.9428	12.1556
sp|P39079|TCPZ_YEAST	CCT6	T-complex protein 1 subunit zeta	23	6.3504	6.33908	6.35884	5.92287	5.9827	5.76136	10.4571	10.144	10.0054	11.1431	10.838	10.6971
sp|P42943|TCPH_YEAST	CCT7	T-complex protein 1 subunit eta	38	5.73451	5.59772	5.63473	5.88519	5.80841	5.85218	10.8157	11.069	10.8972	10.7268	10.7329	11.2457
sp|P47079|TCPQ_YEAST	CCT8	T-complex protein 1 subunit theta	34	5.94262	5.90408	6.14016	6.31574	6.52879	6.63516	10.4011	10.4126	9.86096	10.4712	10.6465	10.7412
sp|Q12127|CCW12_YEAST	CCW12	Covalently-linked cell wall protein 12	1	0.000536756	0	0	0	0	1.0751	15.9322	20.4428	21.0356	11.5427	15.8737	14.0973
sp|O13547|CCW14_YEAST	CCW14	Covalently-linked cell wall protein 14	1	3.08077	3.04277	3.39465	4.33923	3.22431	2.94392	18.4396	16.0428	17.3091	9.86908	9.00284	9.3109
sp|P38273|CCZ1_YEAST	CCZ1	Vacuolar fusion protein CCZ1	7	7.89714	7.7683	7.09394	7.54434	7.6966	7.63418	8.0076	8.57576	7.40459	10.3111	10.0727	9.99377
sp|P40986|CDC1_YEAST	CDC1	Cell division control protein 1	4	7.96624	8.29965	9.09354	9.6985	10.0755	9.87115	7.78109	7.13727	6.66147	7.83209	7.66965	7.91383
sp|P25342|CDC10_YEAST	CDC10	Cell division control protein 10	12	8.28902	8.12288	8.35283	8.27312	8.17097	8.07206	8.78463	8.47935	8.36594	8.28312	8.07283	8.73325
sp|P32458|CDC11_YEAST	CDC11	Cell division control protein 11	10	6.1615	6.1428	6.25541	9.27721	8.97192	8.66265	8.54818	9.15676	8.60097	9.51974	9.33522	9.36764
sp|P32468|CDC12_YEAST	CDC12	Cell division control protein 12	18	7.88606	7.51695	7.89621	7.72974	7.72632	7.60423	9.61062	9.33032	9.47046	8.38199	8.50905	8.33804
sp|Q05791|CD123_YEAST	CDC123	Cell division cycle protein 123	5	6.28631	6.67966	5.94304	8.95366	9.031	8.62658	9.61606	9.68097	9.10373	8.9144	8.76228	8.4023
sp|P32797|CDC13_YEAST	CDC13	Cell division control protein 13	3	5.93884	7.06922	6.8719	6.9032	5.68804	5.46158	10.9337	11.7487	9.72507	8.89139	9.48546	11.2829
sp|Q00684|CDC14_YEAST	CDC14	Tyrosine-protein phosphatase CDC14	14	5.76989	5.69622	5.86214	6.76405	6.99787	6.61427	10.4885	10.2309	9.78084	10.2693	10.627	10.8991
sp|P27636|CDC15_YEAST	CDC15	Cell division control protein 15	3	5.36263	4.67366	4.4085	7.9229	7.83779	8.29276	9.92158	8.83644	8.8707	10.5255	11.6969	11.6506
sp|P09798|CDC16_YEAST	CDC16	Anaphase-promoting complex subunit CDC16	8	5.9397	6.31834	6.37887	6.48738	6.77144	6.36387	10.3569	10.5911	9.9762	10.1859	10.5032	10.1272
sp|P00549|KPYK1_YEAST	CDC19	Pyruvate kinase 1	41	7.04958	6.94977	6.83809	7.19155	7.60484	7.53117	9.10492	9.56596	8.2743	10.0046	9.89155	9.99367
sp|P06785|TYSY_YEAST	CDC21	Thymidylate synthase	15	5.27587	5.36498	5.31421	9.69318	10.0676	9.63826	8.36495	8.0775	8.0286	10.0134	10.0013	10.1602
sp|P16522|CDC23_YEAST	CDC23	Anaphase-promoting complex subunit CDC23	6	7.96641	8.45158	8.23798	6.80983	7.22086	7.66726	8.80904	8.99053	8.40746	9.51376	9.17314	8.75215
sp|P11433|CDC24_YEAST	CDC24	Cell division control protein 24	15	9.42421	9.08801	9.07585	8.22002	8.69853	8.05729	7.56679	7.57083	7.71386	8.58456	8.12795	7.8721
sp|P04821|CDC25_YEAST	CDC25	Cell division control protein 25	11	9.10154	8.81171	9.27757	10.0862	10.3845	10.2307	6.84413	6.67405	6.5039	7.61319	7.27267	7.19981
sp|P00546|CDK1_YEAST	CDC28	Cyclin-dependent kinase 1	18	9.51419	9.63927	9.37351	7.41766	7.35819	7.39115	8.67457	8.81182	8.56013	7.70198	7.67565	7.88186
sp|P32457|CDC3_YEAST	CDC3	Cell division control protein 3	24	6.02095	6.17554	6.17262	7.2815	7.62052	7.21403	9.43884	9.51795	9.4671	10.6307	10.3889	10.0714
sp|P06704|CDC31_YEAST	CDC31	Cell division control protein 31	4	6.43302	5.77532	5.41907	14.3681	13.7782	12.4278	5.12336	6.52183	7.30051	6.37101	7.05457	9.42714
sp|P07260|IF4E_YEAST	CDC33	Eukaryotic translation initiation factor 4E	18	3.14694	2.82057	2.97467	6.36083	5.83354	5.58742	12.1115	12.0576	12.6204	11.8065	11.8898	12.7901
sp|P14682|UBC3_YEAST	CDC34	Ubiquitin-conjugating enzyme E2-34 kDa	4	3.72752	4.18293	3.87197	7.45114	6.68238	6.49329	13.0436	11.2658	12.8032	9.4379	9.8159	11.2244
sp|P06100|NOT2_YEAST	CDC36	General negative regulator of transcription subunit 2	7	5.37144	5.11396	5.52357	6.36662	6.18981	6.06499	11.0735	10.2125	10.2213	11.0527	11.6445	11.1651
sp|P06101|CDC37_YEAST	CDC37	Hsp90 co-chaperone Cdc37	30	6.87004	6.94684	6.86652	7.17651	7.33532	7.39663	9.62485	9.81953	9.63647	9.65442	9.31041	9.36245
sp|P25655|NOT1_YEAST	CDC39	General negative regulator of transcription subunit 1	27	6.34242	6.42829	6.57004	7.07374	7.8781	7.61692	9.65148	9.57263	9.18045	9.97415	10.2027	9.50909
sp|P07834|CDC4_YEAST	CDC4	Cell division control protein 4	4	5.22688	3.17404	4.44179	3.15698	3.30867	3.5909	13.8707	13.8202	13.1008	11.9306	12.7904	11.5881
sp|P40968|PRP17_YEAST	CDC40	Pre-mRNA-processing factor 17	7	8.07872	7.56682	8.27204	8.38712	8.41479	8.65314	7.87396	7.63772	7.78452	9.15304	9.22475	8.95337
sp|P19073|CDC42_YEAST	CDC42	Cell division control protein 42	4	9.55992	9.20334	8.84219	7.64371	8.13845	7.62961	8.25906	8.42734	7.79196	8.23364	8.4785	7.79228
sp|P18898|PGTB1_YEAST	CDC43	Geranylgeranyl transferase type-1 subunit beta	5	9.13349	9.9485	10.2199	8.88748	8.40933	9.23943	8.18293	7.58843	7.4725	6.77971	6.99838	7.13989
sp|Q08032|CDC45_YEAST	CDC45	Cell division control protein 45	4	4.20771	4.12408	4.20613	6.40772	6.36461	5.89304	11.9069	12.1816	11.2919	11.6473	11.0921	10.6769
sp|P25694|CDC48_YEAST	CDC48	Cell division control protein 48	37	5.89531	5.99643	5.99954	10.9731	10.7993	10.6546	6.82174	6.61324	6.91464	9.63351	9.84102	9.85759
sp|P32562|CDC5_YEAST	CDC5	Cell cycle serine/threonine-protein kinase CDC5/MSD2	1	3.54907	4.2515	3.86361	1.546	1.72488	3.37953	16.5385	14.6493	13.3927	12.157	12.4285	12.5194
sp|P25656|CDC50_YEAST	CDC50	Cell division control protein 50	5	8.29457	9.63603	8.86068	7.1697	7.46953	7.5329	8.14405	8.74593	7.70095	8.99899	9.03201	8.41466
sp|Q12018|CDC53_YEAST	CDC53	Cell division control protein 53	27	8.63725	8.724	8.93911	9.57013	9.53676	9.45928	6.95958	6.94147	7.03365	7.91912	8.05826	8.2214
sp|Q00362|2ABA_YEAST	CDC55	Protein phosphatase PP2A regulatory subunit B	12	9.24214	9.17532	9.15662	9.17936	8.45864	8.32263	7.41839	7.28094	8.17671	7.57607	7.66801	8.34515
sp|P26637|SYLC_YEAST	CDC60	Leucine--tRNA ligase, cytoplasmic	38	4.91889	4.90323	5.02935	7.21413	7.36202	7.30874	9.37141	9.16501	9.16276	11.8179	11.8293	11.9173
sp|P06243|CDC7_YEAST	CDC7	Cell division control protein 7	4	2.36638	2.8467	3.24643	4.85089	5.99692	5.17191	13.4058	13.529	12.2074	11.9869	12.5552	11.8364
sp|Q06697|CDC73_YEAST	CDC73	Cell division control protein 73	15	6.92748	6.962	6.72309	6.46082	6.76975	6.8715	10.7547	10.7396	10.2622	9.12232	9.41898	8.98755
sp|P00572|KTHY_YEAST	CDC8	Thymidylate kinase	3	5.98535	5.10101	4.50812	9.50166	8.16375	8.79347	9.49679	8.29931	11.9695	8.51277	9.55872	10.1096
sp|Q06549|CDD_YEAST	CDD1	Cytidine deaminase	4	6.41884	7.4943	7.33657	14.7427	12.9779	14.2201	5.72321	5.24035	5.12111	6.83342	6.52341	7.36807
sp|P53197|CDH1_YEAST	CDH1	APC/C activator protein CDH1	1	9.84134	8.07113	9.21105	8.80013	11.765	9.75743	7.32444	5.02403	9.32927	5.9811	7.10909	7.78604
sp|P38221|CDS1_YEAST	CDS1	Phosphatidate cytidylyltransferase	12	6.41085	6.3837	6.40487	10.2478	10.34	10.7432	8.90372	8.56434	8.5242	7.73115	7.82115	7.92502
sp|Q03654|CEF1_YEAST	CEF1	Pre-mRNA-splicing factor CEF1	5	7.44583	7.2683	7.63108	8.36684	7.81495	8.44539	8.50754	8.75783	9.01205	9.1091	8.74888	8.89221
sp|Q01159|MCE1_YEAST	CEG1	mRNA-capping enzyme subunit alpha	11	7.2001	7.11516	7.49969	8.17012	8.06213	8.07325	8.67165	8.81744	8.64779	9.24561	9.33749	9.15958
sp|P39525|CEM1_YEAST	CEM1	3-oxoacyl-[acyl-carrier-protein] synthase homolog	10	15.0804	14.5469	14.6672	11.3517	10.7762	11.3679	3.51503	3.30353	3.66682	3.78854	3.97837	3.95736
sp|P40969|CBF3B_YEAST	CEP3	Centromere DNA-binding protein complex CBF3 subunit B	1	5.12403	4.26281	4.61895	6.572	6.73409	8.44671	9.96031	10.1864	10.7823	11.6046	10.7889	10.919
sp|O13297|CET1_YEAST	CET1	mRNA-capping enzyme subunit beta	13	7.56439	7.43591	7.34111	7.96438	7.95151	7.85172	8.47412	8.41737	8.45263	9.79647	9.21203	9.53836
sp|Q12453|CEX1_YEAST	CEX1	Cytoplasmic export protein 1	18	6.22392	6.47561	6.4283	8.94518	9.62297	9.45469	8.08876	8.0107	7.96934	9.74522	9.5956	9.43968
sp|P40558|CFD1_YEAST	CFD1	Cytosolic Fe-S cluster assembly factor CFD1	5	6.83983	6.9015	7.12645	8.85096	7.97648	7.79182	9.12239	8.69544	9.09075	8.77596	9.2578	9.57062
sp|Q06632|CFT1_YEAST	CFT1	Protein CFT1	9	8.00113	7.30041	8.05468	7.71693	8.41086	8.21153	8.40477	8.52285	7.53923	9.21373	9.34759	9.27629
sp|Q12102|CFT2_YEAST	CFT2	Cleavage factor two protein 2	14	7.73401	7.96333	8.38926	7.90065	8.03437	8.0477	8.99646	9.10853	8.35569	8.54687	8.59026	8.33288
sp|Q03705|CG121_YEAST	CGI121	EKC/KEOPS complex subunit CGI121	6	7.08351	7.46763	7.50608	6.38194	6.91654	6.83782	10.1528	10.1303	9.51595	8.74964	9.70656	9.55118
sp|P25379|STDH_YEAST	CHA1	Catabolic L-serine/threonine dehydratase	15	2.08805	2.08038	2.05319	3.25183	3.38051	3.29505	6.01296	5.94762	5.25878	22.6985	21.8935	22.0396
sp|P43634|CHA4_YEAST	CHA4	Activatory protein CHA4	2	7.59422	7.1041	11.9549	5.497	5.97238	8.21213	8.67213	9.04294	8.32478	7.40316	10.3773	9.845
sp|P22137|CLH_YEAST	CHC1	Clathrin heavy chain	43	8.85728	9.19658	9.27052	9.60729	10.1364	9.81477	6.51173	6.57686	6.24811	8.02246	7.98988	7.76811
sp|P32657|CHD1_YEAST	CHD1	Chromo domain-containing protein 1	26	4.48145	4.37341	4.45905	7.32549	7.69902	7.48689	9.66183	9.36354	9.18345	12.0634	12.0388	11.8637
sp|P38147|CHK1_YEAST	CHK1	Serine/threonine-protein kinase CHK1	1	1.77378	1.50874	2.24072	3.8551	3.22183	2.77244	16.5349	13.8045	14.9243	12.2235	13.7304	13.4098
sp|P22516|CHL1_YEAST	CHL1	ATP-dependent DNA helicase CHL1	1	5.91584	5.25056	5.49458	12.5938	13.3348	12.5205	7.84044	7.11218	7.09945	7.3861	8.23324	7.21855
sp|P38907|CENPN_YEAST	CHL4	Inner kinetochore subunit CHL4	1	7.56042	7.94754	5.83988	4.44395	7.21082	5.56246	11.6437	11.2621	11.4249	8.79004	8.75131	9.56289
sp|P08456|PSS_YEAST	CHO1	CDP-diacylglycerol--serine O-phosphatidyltransferase	4	6.15838	6.69433	7.25153	12.7088	12.6443	13.0921	6.22415	5.96081	6.01309	7.89633	7.68411	7.67197
sp|P05374|CHO2_YEAST	CHO2	Phosphatidylethanolamine N-methyltransferase	12	3.43939	3.46367	3.3252	9.72361	10.0743	10.1088	8.09553	7.99721	8.0668	11.8943	11.8361	11.9752
sp|P08004|CHS1_YEAST	CHS1	Chitin synthase 1	19	11.2071	12.4922	12.244	2.83665	3.05803	3.20704	10.6249	10.8095	10.6204	7.94975	7.65648	7.29389
sp|P14180|CHS2_YEAST	CHS2	Chitin synthase 2	3	5.26532	4.36557	4.63325	1.16161	1.38393	1.27793	19.4752	18.4439	19.4956	7.66367	8.67605	8.15798
sp|P29465|CHS3_YEAST	CHS3	Chitin synthase 3	14	3.9177	4.19854	4.08863	2.77504	2.75103	2.84619	15.4572	15.2361	14.7989	11.4815	11.1517	11.2975
sp|Q12114|CHS5_YEAST	CHS5	Chitin biosynthesis protein CHS5	21	9.76658	9.47557	9.65277	6.50329	6.96641	6.86471	9.00661	9.01722	9.38818	7.82432	7.92981	7.60454
sp|P40955|CHS6_YEAST	CHS6	Chitin biosynthesis protein CHS6	7	8.94245	10.0629	9.00945	7.34488	6.68496	7.98011	8.50147	8.65351	8.3718	8.58319	8.00358	7.86172
sp|P40019|CHZ1_YEAST	CHZ1	Histone H2A.Z-specific chaperone CHZ1	8	5.68267	5.22439	5.2256	10.0301	11.1205	11.5237	6.15396	7.01332	7.85227	9.73673	9.86928	10.5674
sp|Q05583|CIAO1_YEAST	CIA1	Cytosolic iron-sulfur protein assembly protein 1	1	8.60185	9.70992	9.03105	6.36978	7.74229	6.96385	9.21343	9.35365	8.56667	7.66718	8.54286	8.23746
sp|P38779|CIC1_YEAST	CIC1	Proteasome-interacting protein CIC1	20	4.2174	4.18166	4.08437	2.86528	2.95698	2.77436	14.8841	15.402	15.0219	11.1569	11.2485	11.2066
sp|P40987|CIN1_YEAST	CIN1	Chromosome instability protein 1	1	6.56106	7.13513	7.12683	6.11898	5.62316	4.99631	10.4984	10.5454	9.14114	9.04018	12.1041	11.1093
sp|P39110|CIN4_YEAST	CIN4	GTP-binding protein CIN4	3	9.26964	9.26154	9.7005	8.73358	8.763	9.50266	7.36825	7.72523	6.98413	6.83665	7.71375	8.14107
sp|P27895|CIN8_YEAST	CIN8	Kinesin-like protein CIN8	3	5.24131	4.92281	5.07359	4.1264	4.63295	5.32509	11.8907	11.0811	11.2124	12.0944	12.1775	12.2218
sp|P42940|ETFB_YEAST	CIR1	Probable electron transfer flavoprotein subunit beta	13	7.43827	7.14422	7.39176	10.4026	10.1804	9.92196	7.88884	7.87	8.16713	7.84366	8.04543	7.70573
sp|Q08822|ETFD_YEAST	CIR2	Probable electron transfer flavoprotein-ubiquinone oxidoreductase, mitochondrial	19	9.86215	9.84983	10.0957	11.2596	10.9781	11.152	6.74073	6.51164	6.6627	5.64902	5.61716	5.62142
sp|P47001|CIS3_YEAST	CIS3	Cell wall mannoprotein CIS3	6	5.41799	5.22565	5.50604	12.0554	12.1196	11.7447	6.4917	6.03398	6.1449	9.8513	10.1924	9.21633
sp|P00890|CISY1_YEAST	CIT1	Citrate synthase, mitochondrial	45	15.7587	16.2582	16.1485	13.3688	13.2236	13.7229	2.37588	2.25609	2.45429	1.48671	1.4685	1.47774
sp|P08679|CISY2_YEAST	CIT2	Citrate synthase, peroxisomal	28	18.8291	18.9477	18.8898	8.68028	8.95742	8.95336	4.36574	4.27486	4.55428	1.2072	1.12971	1.21055
sp|P43635|CISY3_YEAST	CIT3	Citrate synthase 3, mitochondrial	29	26.0489	26.2944	26.169	2.41204	2.47021	3.193	3.34835	3.26588	3.09912	1.47918	1.23116	0.988711
sp|P15790|CSK21_YEAST	CKA1	Casein kinase II subunit alpha	12	8.26278	8.4712	8.46656	8.54763	8.58465	9.00362	7.81254	7.89156	7.33381	8.65192	8.62329	8.35045
sp|P19454|CSK22_YEAST	CKA2	Casein kinase II subunit alpha'	17	8.92045	8.18131	8.17093	8.29975	7.47895	7.05464	8.75452	8.45901	9.66197	7.88995	8.54718	8.58133
sp|P43639|CSK2B_YEAST	CKB1	Casein kinase II subunit beta	4	5.3048	5.56162	5.80061	6.21521	6.88902	6.56363	11.0607	11.0412	10.5223	10.3706	10.4527	10.2176
sp|P38930|CSK2C_YEAST	CKB2	Casein kinase II subunit beta'	5	8.38497	8.81285	8.54181	6.64791	7	7.03559	9.65242	11.2644	8.05886	7.319	8.12727	9.15492
sp|P20485|KICH_YEAST	CKI1	Choline kinase	15	9.06331	9.2648	9.38251	10.5176	11.0986	11.2027	6.54676	6.39898	6.66266	6.55033	6.63066	6.68106
sp|P20486|CKS1_YEAST	CKS1	Cyclin-dependent kinases regulatory subunit	4	5.88619	5.80957	5.52082	4.12764	3.86249	4.13284	11.9421	12.9097	13.53	9.88294	11.0914	11.3042
sp|P48562|CLA4_YEAST	CLA4	Serine/threonine-protein kinase CLA4	12	4.03045	3.97111	4.1362	5.80955	6.04045	6.03606	11.8494	11.4919	11.2615	12.0608	11.9839	11.3287
sp|P24869|CG22_YEAST	CLB2	G2/mitotic-specific cyclin-2	1	4.22149	4.60393	3.47824	4.08524	4.41378	4.08885	13.2828	14.9049	12.0824	12.1004	11.3269	11.411
sp|P17891|CLC1_YEAST	CLC1	Clathrin light chain	21	4.25941	4.52917	4.83205	16.6701	15.6967	16.4678	2.69368	2.66065	3.20847	10.0713	9.89372	9.01694
sp|P53264|CLD1_YEAST	CLD1	Cardiolipin-specific deacylase 1, mitochondrial	2	6.09	6.71225	8.43613	20.7513	19.2821	20.984	4.31481	2.62566	3.98122	2.0662	2.44236	2.314
sp|Q12309|CLF1_YEAST	CLF1	Pre-mRNA-splicing factor CLF1	6	7.23375	7.90416	7.84223	8.34418	8.76376	8.52853	8.09294	8.84138	8.23836	8.78825	8.53101	8.89144
sp|Q08685|CLP1_YEAST	CLP1	mRNA cleavage and polyadenylation factor CLP1	9	9.32818	9.64486	9.65104	7.82259	8.61698	8.22562	8.01836	8.66392	7.83659	7.42231	7.50791	7.26165
sp|Q03690|CLU_YEAST	CLU1	Clustered mitochondria protein 1	45	4.68764	4.77579	4.7835	9.5309	9.19862	9.07699	8.10214	7.86304	7.96465	11.3933	11.2191	11.4043
sp|P36064|COXM1_YEAST	CMC1	COX assembly mitochondrial protein	1	9.35973	9.97781	9.34574	6.74218	5.55324	4.07538	13.8921	12.5083	12.542	5.42928	5.27964	5.29451
sp|Q3E7A4|COXM2_YEAST	CMC2	COX assembly mitochondrial protein 2	6	7.81871	7.28872	7.74437	11.9603	12.755	12.4539	8.05069	8.10322	8.37544	4.94644	5.21184	5.29135
sp|Q3E7A9|CMC4_YEAST	CMC4	Cx9C motif-containing protein 4, mitochondrial	2	17.6016	14.0731	14.4707	13.76	14.1071	13.3803	2.6419	2.3437	1.94544	1.78447	1.8962	1.99551
sp|P06787|CALM_YEAST	CMD1	Calmodulin	8	7.03694	7.86894	7.20559	10.4329	11.5485	9.48912	6.59718	6.46322	7.29013	8.64401	8.7954	8.62804
sp|P27466|KCC1_YEAST	CMK1	Calcium/calmodulin-dependent protein kinase I	24	13.8474	13.8168	13.3827	11.5066	11.364	11.6679	4.14521	4.07518	4.142	4.02413	3.96898	4.05922
sp|P22517|KCC2_YEAST	CMK2	Calcium/calmodulin-dependent protein kinase II	20	9.54559	9.52672	9.38447	12.5713	12.6724	13.0201	5.37866	5.25894	5.7248	5.61905	5.74421	5.55376
sp|P14747|PP2B2_YEAST	CMP2	Serine/threonine-protein phosphatase 2B catalytic subunit A2	18	10.5658	10.7826	11.2955	6.40509	6.35261	6.67559	9.62937	9.25853	9.16587	6.52165	6.72964	6.61775
sp|Q12510|CMR1_YEAST	CMR1	DNA damage-binding protein CMR1	3	6.16918	6.06887	6.2557	9.03979	8.04331	8.14238	7.64895	7.93367	7.75001	10.8623	11.2564	10.8294
sp|Q12145|CMR3_YEAST	CMR3	Zinc finger protein CRM3	2	5.47274	6.19124	5.47085	12.2432	11.3128	10.8993	9.29782	8.54503	8.58456	6.8887	8.59302	6.50075
sp|Q07897|CMS1_YEAST	CMS1	Protein CMS1	10	7.95414	7.89915	7.67671	5.25512	5.34901	5.32532	10.5127	10.481	10.5607	10.0148	9.59683	9.37455
sp|P23287|PP2B1_YEAST	CNA1	Serine/threonine-protein phosphatase 2B catalytic subunit A1	17	9.92974	9.86515	10.0401	12.2054	12.4155	12.5107	4.31503	4.15304	4.77523	6.64142	6.76746	6.3813
sp|P25296|CANB_YEAST	CNB1	Calcineurin subunit B	6	8.00121	6.43231	6.25413	17.5309	17.0228	13.5624	4.24258	5.10261	4.71994	7.45464	5.2514	4.4251
sp|P27825|CALX_YEAST	CNE1	Calnexin homolog	3	8.09507	8.48158	8.38478	12.021	11.8827	12.2713	6.15287	6.62093	7.03509	6.97486	5.8784	6.20138
sp|Q06333|BL1S4_YEAST	CNL1	Biogenesis of lysosome-related organelles complex 1 subunit CNL1	2	5.45668	5.49544	5.24499	5.54177	5.62216	5.12612	11.1077	11.2588	9.53146	12.1612	11.3378	12.1158
sp|P53865|CNM67_YEAST	CNM67	Chaotic nuclear migration protein 67	10	5.60241	5.5982	5.54329	7.07687	7.06023	6.71849	10.3947	10.6507	10.2978	10.23	10.514	10.3133
sp|P43618|CENPT_YEAST	CNN1	Inner kinetochore subunit CNN1	1	2.81069	3.05019	4.98809	6.20213	5.10596	4.59949	14.3016	11.3069	10.1554	12.4556	11.9727	13.0514
sp|P33313|CNS1_YEAST	CNS1	Hsp70/Hsp90 co-chaperone CNS1	20	3.94147	3.8329	3.85974	3.77972	3.89972	3.83132	12.7044	12.5438	12.1457	13.0446	13.3622	13.0545
sp|P40452|COA1_YEAST	COA1	Cytochrome c oxidase assembly factor 1	4	10.8645	10.151	10.0003	9.24292	8.43301	7.81859	8.88724	7.34414	8.41322	5.59961	6.38439	6.86111
sp|Q3E7B2|COA3_YEAST	COA3	Cytochrome c oxidase assembly factor 3, mitochondrial	1	12.3606	13.9021	12.8137	8.12321	8.41133	9.11517	6.52862	6.90017	5.68114	5.20087	5.61316	5.34997
sp|Q05809|COA4_YEAST	COA4	Cytochrome oxidase assembly factor 4	2	8.53196	8.79886	8.76075	13.5891	13.8153	13.8049	5.59705	6.6095	6.20689	5.01663	4.98889	4.28014
sp|Q3E846|COA6_YEAST	COA6	Cytochrome c oxidase assembly factor 6	2	12.756	13.0011	13.0101	10.5732	11.4768	11.2763	5.68309	5.61775	5.63924	3.67063	3.3465	3.9493
sp|Q03048|COFI_YEAST	COF1	Cofilin	35	7.24655	7.01984	7.06674	10.2397	9.7506	10.1116	6.903	7.06057	7.37937	8.72121	9.25482	9.24594
sp|P53079|COG1_YEAST	COG1	Conserved oligomeric Golgi complex subunit 1	13	6.18299	6.32201	6.29825	7.54799	7.39461	7.43054	9.58868	9.6419	9.68128	9.88559	9.66576	10.3604
sp|P53271|COG2_YEAST	COG2	Conserved oligomeric Golgi complex subunit 2	12	7.34144	7.2765	7.92301	7.57738	7.59173	7.57177	10.4148	10.7552	10.5597	7.53998	7.51501	7.93353
sp|P40094|COG3_YEAST	COG3	Conserved oligomeric Golgi complex subunit 3	15	7.2365	7.44604	7.25574	8.26011	8.26266	8.34448	8.71301	8.57388	8.55828	9.05618	9.14068	9.15243
sp|Q06096|COG4_YEAST	COG4	Conserved oligomeric Golgi complex subunit 4	15	6.78704	6.81601	7.02201	7.17167	6.97823	6.91956	10.0265	9.72891	9.75407	9.72211	9.56911	9.5048
sp|P53951|COG5_YEAST	COG5	Conserved oligomeric Golgi complex subunit 5	10	6.78723	6.92634	6.86675	8.14969	8.45398	8.552	8.59928	9.19284	8.68337	9.53779	9.03311	9.21762
sp|P53959|COG6_YEAST	COG6	Conserved oligomeric Golgi complex subunit 6	10	7.28108	7.40941	7.53848	7.85115	7.9143	7.82538	8.20051	8.59594	8.13812	9.97736	9.91955	9.34871
sp|P53195|COG7_YEAST	COG7	Conserved oligomeric Golgi complex subunit 7	4	7.05183	6.40579	7.31745	8.00025	7.81667	7.32491	9.25917	9.94025	8.42764	8.34867	9.23797	10.8694
sp|Q04632|COG8_YEAST	COG8	Conserved oligomeric Golgi complex subunit 8	15	7.99888	7.75353	7.7415	7.44621	7.25798	7.18312	8.81886	8.84734	9.03374	9.36405	9.37173	9.18306
sp|P53622|COPA_YEAST	COP1	Coatomer subunit alpha	33	6.90095	6.73077	6.92186	9.75506	9.49635	9.58953	7.54393	7.4108	7.40667	9.05596	9.48556	9.70256
sp|P18900|COQ1_YEAST	COQ1	Hexaprenyl pyrophosphate synthase, mitochondrial	11	2.78545	2.58881	2.49884	13.6619	12.1782	12.2507	9.96299	9.07897	9.9952	8.27617	8.06165	8.66118
sp|Q08058|COQ10_YEAST	COQ10	Coenzyme Q-binding protein COQ10, mitochondrial	1	9.64421	12.9818	7.94443	7.96316	8.98642	7.12989	7.27132	10.1968	6.26091	8.71967	4.8534	8.04802
sp|Q05892|COQ11_YEAST	COQ11	MIOREX complex component 2	12	8.14318	7.77521	7.93585	17.1457	17.6778	17.0252	3.07689	2.90334	3.50873	4.97541	5.1246	4.7081
sp|P32378|COQ2_YEAST	COQ2	4-hydroxybenzoate polyprenyltransferase, mitochondrial	5	11.388	11.2275	11.9949	9.2975	9.85779	10.0951	7.27561	6.50011	6.81908	5.23898	5.11833	5.18716
sp|P27680|COQ3_YEAST	COQ3	Ubiquinone biosynthesis O-methyltransferase, mitochondrial	6	9.40801	10.7882	10.149	12.6366	14.382	12.0309	5.28057	5.68788	5.67461	4.4003	5.04047	4.52154
sp|O13525|COQ4_YEAST	COQ4	Ubiquinone biosynthesis protein COQ4, mitochondrial	8	9.51086	9.12658	9.28042	16.2257	16.5174	16.381	3.8207	3.44392	3.97677	3.97365	3.95997	3.78309
sp|P49017|COQ5_YEAST	COQ5	2-methoxy-6-polyprenyl-1,4-benzoquinol methylase, mitochondrial	22	7.85246	7.70298	7.93108	14.1757	12.9772	13.0383	5.68248	5.56975	5.83986	6.44409	6.3205	6.46555
sp|P53318|COQ6_YEAST	COQ6	Ubiquinone biosynthesis monooxygenase COQ6, mitochondrial	17	8.179	8.31353	8.47045	13.7452	13.3636	12.9757	5.65114	5.49684	6.07527	6.10068	5.86315	5.76545
sp|P27697|COQ8_YEAST	COQ8	Atypical kinase COQ8, mitochondrial	8	11.287	11.4806	11.8599	9.23489	9.21198	9.16271	7.28565	6.90176	7.31847	5.46705	5.42666	5.36343
sp|Q05779|COQ9_YEAST	COQ9	Ubiquinone biosynthesis protein COQ9, mitochondrial	9	6.70111	6.94814	7.00958	16.9144	16.6502	16.2226	4.48906	4.28417	4.82362	5.51565	5.04204	5.39938
sp|P07256|QCR1_YEAST	COR1	Cytochrome b-c1 complex subunit 1, mitochondrial	34	12.5206	12.6178	12.5738	13.3516	11.4197	14.0358	4.50948	4.41834	5.09165	3.13171	3.14408	3.18544
sp|P36034|COS9_YEAST	COS9	Protein COS9	1	7.40167	6.96135	8.04912	9.85194	10.1579	9.56974	6.52924	5.67804	5.66616	10.7252	10.2361	9.17352
sp|P32798|COT1_YEAST	COT1	Cobalt uptake protein COT1	6	13.7462	14.2883	14.0939	6.36752	6.80832	7.28584	6.65811	6.49287	6.35723	5.734	5.89924	6.26851
sp|P00401|COX1_YEAST	COX1	Cytochrome c oxidase subunit 1	2	12.1558	14.3906	14.7829	11.3237	12.4271	12.3573	5.29369	5.76876	5.34175	1.87307	2.0141	2.27134
sp|P21592|COX10_YEAST	COX10	Protoheme IX farnesyltransferase, mitochondrial	1	11.3596	9.63832	10.0958	8.00941	6.06747	6.81534	13.2277	9.61034	13.1881	3.96256	3.05673	4.96852
sp|P19516|COX11_YEAST	COX11	Cytochrome c oxidase assembly protein COX11, mitochondrial	5	11.4791	12.0877	12.1412	10.761	11.3198	11.3594	6.10186	5.69639	5.9644	4.5855	4.19879	4.30487
sp|Q01519|COX12_YEAST	COX12	Cytochrome c oxidase subunit 12, mitochondrial	3	15.7157	9.5139	11.0828	22.0405	18.5108	11.1116	2.07781	4.19862	1.71341	2.16712	1.09042	0.777278
sp|P32799|COX13_YEAST	COX13	Cytochrome c oxidase subunit 13, mitochondrial	15	11.359	11.0954	11.2957	11.4484	11.6382	11.4881	7.27293	6.918	7.41897	3.36342	3.36735	3.33448
sp|P39103|COX14_YEAST	COX14	Cytochrome c oxidase assembly protein COX14	2	11.8469	12.4231	13.2376	11.2378	12.2989	11.7822	5.26373	4.98288	5.38875	3.58547	3.57747	4.3753
sp|P40086|COX15_YEAST	COX15	Cytochrome c oxidase assembly protein COX15	16	15.6439	17.1077	17.466	8.48607	8.72959	9.43085	4.78799	4.45214	5.01931	3.06224	2.94777	2.86637
sp|P53239|COX18_YEAST	COX18	Cytochrome c oxidase assembly protein COX18, mitochondrial	4	10.6953	11.0075	10.3032	6.83272	7.60556	7.58543	9.06198	8.68226	8.31125	6.35632	7.01871	6.53969
sp|P00410|COX2_YEAST	COX2	Cytochrome c oxidase subunit 2	20	10.926	11.5051	12.0257	11.3736	11.987	11.8037	6.54893	6.96426	6.22579	3.76209	3.63253	3.24534
sp|Q04935|COX20_YEAST	COX20	Cytochrome c oxidase assembly protein COX20, mitochondrial	13	15.2521	15.5786	15.5724	9.18701	9.41099	9.72902	5.61511	5.41049	5.3893	2.9776	2.94743	2.92988
sp|P38824|COX23_YEAST	COX23	Cytochrome c oxidase-assembly factor COX23, mitochondrial	2	11.3868	9.71997	9.66653	10.0767	11.2993	8.56707	6.89447	8.16981	8.52607	5.83385	4.80798	5.05145
sp|Q2V2P9|COX26_YEAST	COX26	Cytochrome c oxidase subunit 26, mitochondrial	2	12.3933	12.9373	11.2932	15.6284	16.0902	15.1981	2.67714	2.13242	2.52132	2.81703	3.093	3.21863
sp|P00420|COX3_YEAST	COX3	Cytochrome c oxidase subunit 3	1	8.37852	12.396	11.8037	5.94138	9.38794	8.51454	6.49454	7.89756	9.65834	6.4955	6.82407	6.20787
sp|P04037|COX4_YEAST	COX4	Cytochrome c oxidase subunit 4, mitochondrial	6	9.07877	9.31943	8.7471	20.3798	16.3021	16.3024	3.64817	3.97621	5.74811	1.91672	2.29117	2.29004
sp|P00424|COX5A_YEAST	COX5A	Cytochrome c oxidase subunit 5A, mitochondrial	10	13.8188	13.516	13.2268	10.8747	11.5078	11.4007	6.39177	6.19944	6.37894	2.37203	2.29215	2.02094
sp|P00425|COX5B_YEAST	COX5B	Cytochrome c oxidase subunit 5B, mitochondrial	6	8.99018	10.0481	9.88976	14.5744	14.287	14.6957	3.79537	3.33224	3.76311	5.80501	5.35878	5.46038
sp|P00427|COX6_YEAST	COX6	Cytochrome c oxidase subunit 6, mitochondrial	7	9.46371	7.78968	7.94457	30.3658	17.7176	13.7357	2.14411	2.52892	2.76005	1.83832	1.79427	1.91731
sp|P04039|COX8_YEAST	COX8	Cytochrome c oxidase subunit 8, mitochondrial	4	15.5741	15.966	15.7596	12.5053	12.1625	13.6587	3.44444	3.21269	3.55092	1.41732	1.42149	1.32692
sp|P07255|COX9_YEAST	COX9	Cytochrome c oxidase subunit 9, mitochondrial	5	14.8783	14.8938	15.1884	10.5821	11.3988	11.627	4.95176	4.81756	5.17193	1.96162	2.39384	2.135
sp|P34237|CASP_YEAST	COY1	Protein CASP	14	7.88746	7.81197	7.89928	8.21776	7.87104	7.93355	8.35701	7.8161	8.88569	8.75041	9.1901	9.37961
sp|P07258|CARA_YEAST	CPA1	Carbamoyl-phosphate synthase arginine-specific small chain	17	1.2539	1.36589	1.19432	1.74926	1.56412	1.43549	22.3981	22.9158	21.7779	8.05037	7.92193	8.37287
sp|P03965|CARB_YEAST	CPA2	Carbamoyl-phosphate synthase arginine-specific large chain	46	8.17499	8.05542	7.92121	4.57931	4.86192	4.79247	14.8347	15.3057	14.6621	5.32989	5.54912	5.93315
sp|P53314|CPD1_YEAST	CPD1	2',3'-cyclic-nucleotide 3'-phosphodiesterase	4	13.99	13.81	13.8438	9.02803	10.0872	8.5819	6.21218	5.03606	5.18716	4.75933	4.75567	4.70865
sp|P14832|CYPH_YEAST	CPR1	Peptidyl-prolyl cis-trans isomerase	45	9.88293	10.0637	9.83831	9.6751	9.52408	9.599	6.59324	6.68347	6.49805	7.24127	7.2748	7.12605
sp|P23285|CYPB_YEAST	CPR2	Peptidyl-prolyl cis-trans isomerase B	5	9.38639	8.83716	9.30801	7.92809	7.05841	7.15046	9.85137	10.0964	10.8644	6.10437	6.42511	6.98989
sp|P25719|CYPC_YEAST	CPR3	Peptidyl-prolyl cis-trans isomerase C, mitochondrial	24	8.46382	8.38349	8.64173	11.9228	10.6153	10.816	6.69537	6.64928	6.75382	6.95604	7.12849	6.97384
sp|P25334|CYPR_YEAST	CPR4	Peptidyl-prolyl cis-trans isomerase CPR4	2	3.94183	3.5952	4.52407	6.7803	5.76598	5.41713	13.7266	13.5914	13.1923	10.1088	9.79866	9.55775
sp|P35176|CYPD_YEAST	CPR5	Peptidyl-prolyl cis-trans isomerase D	22	7.98783	6.72835	6.93752	13.2619	14.3279	12.7219	5.37382	5.6169	5.73826	6.92066	7.05188	7.33313
sp|P53691|PPID_YEAST	CPR6	Peptidyl-prolyl cis-trans isomerase CPR6	33	7.48279	7.19276	7.0987	11.6585	11.9606	11.6536	6.99717	7.25744	7.06367	7.45535	7.18073	6.99865
sp|P47103|CYP7_YEAST	CPR7	Peptidyl-prolyl cis-trans isomerase CYP7	13	8.31567	8.14711	8.22336	7.74331	8.16444	7.81385	8.93014	8.61446	9.24005	8.17596	8.36473	8.26693
sp|P53728|CYP8_YEAST	CPR8	Peptidyl-prolyl cis-trans isomerase CYP8	6	8.07481	8.4704	8.49194	8.21753	7.45936	7.21798	8.7565	8.8786	9.57452	8.22837	8.41857	8.21142
sp|P27614|CBPS_YEAST	CPS1	Carboxypeptidase S	24	12.5026	12.4398	12.4189	8.88136	9.09804	9.14965	6.7885	6.68795	6.61652	5.27451	5.04096	5.10131
sp|P17898|CPT1_YEAST	CPT1	Cholinephosphotransferase 1	3	5.8576	6.53581	6.48802	10.9148	10.9599	11.2977	7.49576	7.19931	7.48695	8.29736	9.09998	8.36685
sp|Q12289|CRC1_YEAST	CRC1	Mitochondrial carnitine carrier	19	28.5375	25.5947	25.8042	3.47927	4.2742	4.23126	1.69656	1.90493	1.82479	0.991741	0.829269	0.831657
sp|Q07560|CRD1_YEAST	CRD1	Cardiolipin synthase (CMP-forming)	1	10.6739	13.4885	13.7162	9.36288	11.286	10.304	5.28911	5.46114	5.4519	5.30906	4.79192	4.86547
sp|P38892|CRG1_YEAST	CRG1	Probable S-adenosylmethionine-dependent methyltransferase CRG1	4	18.4729	18.7083	18.8897	5.48915	5.80929	6.10211	6.30745	6.7835	6.3384	2.0544	2.57867	2.46605
sp|P53301|CRH1_YEAST	CRH1	Probable glycosidase CRH1	27	11.982	12.3579	12.7641	7.72334	7.80325	7.92657	6.73042	6.61218	6.68014	6.48708	6.57817	6.35489
sp|P30822|XPO1_YEAST	CRM1	Exportin-1	38	8.11545	8.5648	8.62394	9.81404	10.5581	10.4831	6.07774	6.1429	5.84479	8.6021	8.69407	8.47904
sp|Q06440|CORO_YEAST	CRN1	Coronin-like protein	28	5.426	5.31208	5.33654	6.10158	6.20928	6.12275	10.6477	10.6837	10.7612	11.1505	11.1869	11.0617
sp|P38845|CRP1_YEAST	CRP1	Cruciform DNA-recognizing protein 1	32	8.4132	8.1682	8.62447	8.38115	9.06856	8.94815	6.87524	6.85677	6.52055	9.6737	9.61592	8.8541
sp|Q08226|CRT10_YEAST	CRT10	Protein CRT10	2	8.49716	7.07546	6.83979	8.98153	9.29712	7.26911	9.39468	7.09522	8.18774	8.04534	9.65479	9.66205
sp|P53968|CRZ1_YEAST	CRZ1	Transcriptional regulator CRZ1	7	9.06719	8.72529	9.00482	6.34572	7.00757	6.74116	8.61368	9.19831	9.24735	8.10644	9.06816	8.87433
sp|Q06538|CSC1_YEAST	CSC1	Calcium permeable stress-gated cation channel 1	2	14.5871	16.4528	17.0446	5.23398	5.59793	7.07903	6.24112	6.14539	5.50276	5.15533	5.38942	5.57053
sp|P33307|CSE1_YEAST	CSE1	Importin alpha re-exporter	29	5.25948	5.37721	5.60842	8.38423	8.9614	8.71585	8.61982	8.84115	8.22127	11.0658	10.48	10.4654
sp|Q12150|CSF1_YEAST	CSF1	Protein CSF1	5	7.88771	7.46663	7.8359	8.0105	8.31995	8.09352	8.79074	8.23558	9.30869	8.42211	8.38129	9.24738
sp|P35206|CSG2_YEAST	CSG2	Mannosyl phosphorylinositol ceramide synthase regulatory protein CSG2	4	4.93433	5.02751	5.30157	7.36317	7.55146	7.53026	11.7952	11.9443	11.509	8.95103	9.18458	8.90766
sp|Q04368|CSI1_YEAST	CSI1	Cop9 signalosome-interactor 1	1	9.94521	10.7529	10.4342	17.9429	12.7579	12.2899	4.57273	3.8578	2.45994	3.78847	5.57197	5.6261
sp|Q08054|CSI2_YEAST	CSI2	Chitin synthase 3 complex protein CSI2	1	0.466558	0.552202	0.490464	0.411904	0.583067	0.136151	24.7637	25.5904	25.0756	7.28918	6.42875	8.21199
sp|P53859|CSL4_YEAST	CSL4	Exosome complex component CSL4	9	4.63697	4.53939	4.47566	4.88432	4.99193	5.16321	11.8884	12.3386	10.8584	12.4088	11.9346	11.8796
sp|P25651|CSM1_YEAST	CSM1	Monopolin complex subunit CSM1	2	5.15273	4.90123	4.44811	6.00122	5.23135	4.95854	12.4186	12.8136	12.1211	10.4484	10.4642	11.041
sp|Q04659|CSM3_YEAST	CSM3	Chromosome segregation in meiosis protein 3	3	3.6379	4.23942	4.42328	4.75758	4.84048	4.08832	12.1538	12.9506	12.7291	12.6051	12.3834	11.191
sp|Q08955|CSM4_YEAST	CSM4	Chromosome segregation in meiosis protein 4	1	2.58925	3.17439	2.97954	5.01543	4.56833	4.27114	14.1981	15.1516	9.73364	15.9277	12.0563	10.3347
sp|P47130|CSN12_YEAST	CSN12	Cop9 signalosome complex subunit 12	5	9.72501	9.69268	10.2703	8.41637	8.28273	9.15567	7.47114	7.59015	7.40585	7.69781	7.57017	6.72218
sp|Q03981|CSN9_YEAST	CSN9	COP9 signalosome complex subunit 9	2	8.79737	8.51052	8.7987	10.278	10.3232	10.0022	6.3304	6.25521	5.72956	7.83786	8.24499	8.892
sp|Q06705|CSR1_YEAST	CSR1	Phosphatidylinositol transfer protein CSR1	15	6.15208	5.92226	6.15244	6.72418	6.49983	6.50544	10.7316	10.5633	11.0072	9.26572	10.0031	10.4729
sp|Q12734|CSR2_YEAST	CSR2	Transcription factor CSR2	5	9.13863	9.31545	9.81244	22.1115	23.1386	22.0256	0.47824	0.430959	0.599275	1.15997	0.907434	0.881894
sp|Q08300|CSS3_YEAST	CSS3	Secreted protein CSS3	1	8.05684	7.52028	9.45782	16.4097	15.4464	11.9852	3.85018	4.76249	5.6366	4.36798	6.93517	5.57144
sp|P38226|CST26_YEAST	CST26	Uncharacterized acyltransferase CST26	5	5.49129	5.49454	5.58126	6.81912	6.5455	7.06891	10.4177	10.6619	9.19031	10.4925	10.9506	11.2863
sp|P40535|ACA2_YEAST	CST6	ATF/CREB activator 2	9	6.48119	6.15022	6.38431	8.25468	8.2476	8.26981	9.31479	9.23955	9.52856	9.2082	9.26941	9.65166
sp|Q06032|CST9_YEAST	CST9	Chromosome stability protein 9	1	6.04941	6.58963	7.18438	16.7281	17.2203	15.2584	3.81937	4.06094	4.5162	6.66713	6.27062	5.63558
sp|P15202|CATA_YEAST	CTA1	Peroxisomal catalase A	24	22.8444	23.2649	22.8961	3.8061	3.79134	4.37378	4.70725	4.79254	4.772	1.59848	1.60121	1.55181
sp|P49956|CTF18_YEAST	CTF18	Chromosome transmission fidelity protein 18	11	4.62916	5.90008	4.6344	6.56987	6.15819	6.19061	10.6706	11.5285	11.0546	10.9274	10.6945	11.0422
sp|Q01454|CTF4_YEAST	CTF4	DNA polymerase alpha-binding protein	14	6.24646	6.16008	6.58165	9.1834	9.00968	8.84606	8.46761	8.32912	8.19522	9.65449	9.79249	9.53372
sp|P38877|CTF8_YEAST	CTF8	Chromosome transmission fidelity protein 8	3	6.56069	7.04997	5.97382	7.39993	7.63672	7.78321	8.60583	8.52005	7.65654	10.7831	11.2696	10.7605
sp|Q08923|CTI6_YEAST	CTI6	Histone deacetylase complex subunit CTI6	6	5.52495	5.57174	5.52539	6.93685	6.81457	6.47596	10.5509	10.6069	10.7204	10.434	10.3788	10.4595
sp|Q03957|CTK1_YEAST	CTK1	CTD kinase subunit alpha	9	5.08212	5.57929	5.92814	8.54837	9.13313	9.04061	9.16651	9.30615	8.15515	9.77249	10.3303	9.95775
sp|P46962|CTK2_YEAST	CTK2	CTD kinase subunit beta	5	6.08022	6.04042	6.76954	8.33657	8.89742	8.84977	9.02618	8.8631	7.87367	9.90207	8.96592	10.3951
sp|P46963|CTK3_YEAST	CTK3	CTD kinase subunit gamma	5	4.73633	4.50043	4.87815	7.07562	6.72571	6.78843	11.3235	10.8986	10.828	10.5934	10.4836	11.1682
sp|P38818|CTM1_YEAST	CTM1	Cytochrome c lysine N-methyltransferase 1	1	7.12427	7.43417	8.42887	13.6552	11.6336	11.3768	6.74889	7.73718	7.75505	5.24878	5.45246	7.40474
sp|P25616|CTO1_YEAST	CTO1	Cold tolerance protein 1	3	8.84201	9.00444	9.19736	9.73657	10.6278	10.2841	6.41006	7.2776	6.20973	7.43772	7.60034	7.37224
sp|P38152|TXTP_YEAST	CTP1	Tricarboxylate transport protein	3	13.2568	13.6575	14.8727	4.6567	4.78909	4.95339	10.0503	8.9827	9.94324	4.76538	5.26399	4.80821
sp|P49573|CTR1_YEAST	CTR1	Copper transport protein CTR1	11	7.98627	7.83857	7.747	3.64854	3.50756	3.90365	11.5866	12.8725	13.0964	9.27124	9.23061	9.31108
sp|P25355|CTR86_YEAST	CTR86	Copper transport protein 86	13	8.03804	8.11062	7.96963	7.49652	7.80346	7.69611	8.95283	8.66398	8.59609	8.9595	8.85961	8.8536
sp|P89105|CTR9_YEAST	CTR9	RNA polymerase-associated protein CTR9	22	7.96499	8.18147	8.05555	8.9828	9.00107	8.86625	8.10704	8.22835	7.97589	8.14373	8.11992	8.37294
sp|P29029|CHIT_YEAST	CTS1	Endochitinase	2	7.98874	9.1922	8.62101	2.79172	2.42385	3.03892	10.5536	10.6446	9.49253	11.8404	12.262	11.1505
sp|Q06350|CHI2_YEAST	CTS2	Sporulation-specific chitinase 2	3	9.20438	9.54444	9.50481	7.72096	8.36819	8.61191	7.93003	8.23659	7.61725	7.21343	7.71086	8.33715
sp|P06115|CATT_YEAST	CTT1	Catalase T	28	8.3363	7.70143	8.09954	23.3169	22.7157	22.0991	1.12527	0.81117	1.5591	1.50688	1.37256	1.35613
sp|Q08977|CUB1_YEAST	CUB1	Cu(2+) suppressing and bleomycin sensitive protein 1	27	10.3117	10.2179	10.3408	11.3899	11.4366	10.8529	6.50374	6.40461	6.50735	5.39761	5.33786	5.29896
sp|P38428|CUE1_YEAST	CUE1	Coupling of ubiquitin conjugation to ER degradation protein 1	8	4.56802	4.44061	4.62093	9.3286	9.95907	9.18439	7.09514	6.7683	6.52679	12.4401	12.455	12.6131
sp|P36075|CUE2_YEAST	CUE2	Ubiquitin-binding protein CUE2	4	5.03057	5.01396	4.90725	6.83301	6.50727	6.40467	11.0508	12.1325	11.8585	9.69971	10.4737	10.088
sp|P53137|CUE3_YEAST	CUE3	CUE domain-containing protein 3	9	5.49862	5.77252	5.59903	8.45857	8.61983	8.40373	8.16058	7.84163	7.80248	11.4393	11.6979	10.7058
sp|Q04201|CUE4_YEAST	CUE4	CUE domain-containing protein CUE4	1	4.50141	4.75663	4.60148	7.29071	7.5761	6.57612	10.5895	10.1346	10.6893	10.8169	10.8919	11.5754
sp|Q08412|CUE5_YEAST	CUE5	Ubiquitin-binding protein CUE5	29	8.54629	8.70696	8.7886	11.7218	11.4182	11.3942	5.67021	6.36108	6.45384	7.20507	6.93072	6.80305
sp|P53202|CUL3_YEAST	CUL3	Cullin-3	5	5.16123	5.25035	5.36935	5.55562	5.73451	5.72767	11.3538	10.9565	11.0517	11.4551	10.8368	11.5473
sp|Q02554|CUS1_YEAST	CUS1	Cold sensitive U2 snRNA suppressor 1	7	8.12183	8.38084	8.45191	8.08149	8.143	7.52569	8.30379	7.58614	8.46064	9.55248	8.56638	8.82582
sp|P53830|CUS2_YEAST	CUS2	Cold sensitive U2 snRNA suppressor 2	3	10.2661	11.2804	11.1969	6.75807	6.44692	6.82681	8.71243	9.69134	8.70788	6.32372	6.87811	6.91132
sp|P53899|CUZ1_YEAST	CUZ1	CDC48-associated ubiquitin-like/zinc finger protein 1	11	2.82341	2.72599	2.90438	4.4371	4.20155	3.96591	14.4165	14.6484	14.6778	11.6581	11.6957	11.8453
sp|Q03772|CWC15_YEAST	CWC15	Pre-mRNA-splicing factor CWC15	6	6.37582	6.37814	6.49276	6.5788	6.63339	6.32079	10.2522	10.712	10.2363	10.404	9.85008	9.76563
sp|Q12046|CWC2_YEAST	CWC2	Pre-mRNA-splicing factor CWC2	3	7.18679	7.55494	7.13128	9.0512	9.11037	9.23044	8.08014	8.24842	7.8235	8.85122	8.59706	9.13463
sp|Q03375|CWC21_YEAST	CWC21	Pre-mRNA-splicing factor CWC21	2	3.41384	2.85951	3.76393	7.00717	7.22737	7.45197	11.1297	11.0395	10.7502	12.5458	12.0151	10.7959
sp|P53333|CWC22_YEAST	CWC22	Pre-mRNA-splicing factor CWC22	9	6.8511	7.34723	6.98101	10.0718	10.2645	9.92976	8.0317	8.20886	8.44713	8.12488	7.60742	8.13457
sp|P52868|CWC23_YEAST	CWC23	Pre-mRNA-splicing factor CWC23	3	8.63551	7.70071	7.20273	9.58404	9.64194	9.41923	7.49702	7.59027	7.73088	8.35624	8.35307	8.28837
sp|P53769|CWC24_YEAST	CWC24	Pre-mRNA-splicing factor CWC24	1	5.56403	5.42649	5.02627	6.68101	6.90805	6.72913	9.98951	10.6705	10.5069	10.9288	10.7502	10.8191
sp|P53854|CWC25_YEAST	CWC25	Pre-mRNA-splicing factor CWC25	3	6.75308	6.48766	6.96268	5.5131	5.42228	5.54625	10.05	10.2848	10.3562	10.5011	11.3503	10.7726
sp|Q02770|CWC27_YEAST	CWC27	Peptidyl-prolyl isomerase CWC27	5	7.36699	7.70654	8.05538	8.9167	8.92795	8.94152	8.01555	7.89586	8.25279	8.72722	8.30877	8.88473
sp|P53008|CWH41_YEAST	CWH41	Mannosyl-oligosaccharide glucosidase	24	7.2924	7.49452	7.27731	8.11223	7.99526	7.94872	8.71085	8.97399	8.76997	8.94255	9.17746	9.30474
sp|P25618|CWH43_YEAST	CWH43	Protein CWH43	14	8.67017	9.24314	9.37542	10.0184	10.045	10.3542	6.58496	6.70483	6.76282	7.42105	7.00711	7.8129
sp|P28319|CWP1_YEAST	CWP1	Cell wall protein CWP1	30	5.68792	5.64336	5.70832	12.9425	12.696	12.5753	7.14542	6.63539	7.17183	7.82102	8.13488	7.83796
sp|P00175|CYB2_YEAST	CYB2	Cytochrome b2, mitochondrial	16	23.6502	22.9615	23.0866	4.80634	4.52178	4.97225	4.29815	4.42024	4.49273	0.927612	0.894858	0.967731
sp|P40312|CYB5_YEAST	CYB5	Cytochrome b5	9	11.7401	12.2573	12.0242	2.57019	2.56534	2.85555	13.918	14.2821	14.3758	4.5307	4.35348	4.52723
sp|P00044|CYC1_YEAST	CYC1	Cytochrome c isoform 1	13	19.4466	20.0365	16.4837	8.17486	7.85991	8.52196	5.02838	5.37664	5.16117	1.12772	1.44193	1.34065
sp|P38909|CYC2_YEAST	CYC2	Cytochrome c mitochondrial import factor CYC2	3	10.9329	10.9516	11.3559	8.6674	8.57132	8.54428	8.14356	8.26716	8.49434	5.29417	5.21077	5.56667
sp|P06182|CCHL_YEAST	CYC3	Cytochrome c heme lyase	7	11.3698	11.8549	11.466	7.48782	7.60252	7.78265	9.9926	9.83553	9.69229	4.32574	4.33321	4.25692
sp|P00045|CYC7_YEAST	CYC7	Cytochrome c isoform 2	7	15.5077	14.3864	14.839	15.5863	13.7972	14.2735	1.65431	1.58975	2.30161	1.9601	2.06316	2.04092
sp|P14922|CYC8_YEAST	CYC8	General transcriptional corepressor CYC8	28	7.44897	7.60928	7.6242	6.78872	7.08586	7.08593	9.38759	9.47183	8.96902	9.53975	9.40303	9.58583
sp|Q07533|CYK3_YEAST	CYK3	Cytokinesis protein 3	5	2.63571	3.02002	2.88178	4.75383	5.23508	5.11729	13.356	12.88	12.712	12.4459	12.9143	12.0482
sp|P32898|CYM1_YEAST	CYM1	Mitochondrial presequence protease	26	9.99818	10.081	10.1953	7.63687	7.78336	7.79994	9.1694	9.07303	9.00047	6.27597	6.40889	6.57758
sp|P08678|CYAA_YEAST	CYR1	Adenylate cyclase	26	8.96457	8.98853	9.33436	10.5294	11.2094	10.9607	5.46691	5.41206	5.55537	8.12098	7.7517	7.70599
sp|P31373|CYS3_YEAST	CYS3	Cystathionine gamma-lyase	30	8.89556	8.61454	8.58883	3.81527	3.89575	3.89781	11.1223	11.2659	10.7683	9.89562	9.61386	9.62624
sp|P32582|CBS_YEAST	CYS4	Cystathionine beta-synthase	42	8.06346	7.04267	7.18433	5.85604	5.32489	5.36615	9.03469	8.7714	9.93493	10.5425	11.1077	11.7712
sp|P07143|CY1_YEAST	CYT1	Cytochrome c1, heme protein, mitochondrial	24	13.3834	12.1828	12.0571	12.3086	12.8245	12.4208	5.88167	5.99457	6.34878	2.20068	2.07278	2.32426
sp|Q00873|CYT2_YEAST	CYT2	Cytochrome c1 heme lyase	3	9.54189	10.2247	9.99313	7.32648	7.76804	7.31138	10.0227	10.4283	9.96008	5.53894	5.81798	6.06631
sp|P36162|DAD2_YEAST	DAD2	DASH complex subunit DAD2	1	4.98785	6.18319	5.9547	13.2219	9.13001	7.52299	6.188	7.64643	8.69475	11.0715	9.85478	9.54389
sp|P69850|DAD3_YEAST	DAD3	DASH complex subunit DAD3	1	4.79903	3.75925	4.48489	21.9306	11.9802	8.61793	3.62848	9.92488	2.4711	15.2531	6.7781	6.37244
sp|P54838|DAK1_YEAST	DAK1	Dihydroxyacetone kinase 1	36	7.09615	6.99675	7.13474	14.0353	14.4913	14.115	5.09429	5.12838	4.88392	7.37367	7.01851	6.63202
sp|P43550|DAK2_YEAST	DAK2	Dihydroxyacetone kinase 2	9	18.8735	18.781	19.0332	3.14914	3.14734	3.61319	8.68881	8.39131	8.9686	2.37536	2.43472	2.5438
sp|P25335|ALLC_YEAST	DAL2	Allantoicase	1	9.88788	11.337	9.50207	12.1561	15.5419	13.4772	6.09038	5.71016	5.0572	3.84653	2.94185	4.45181
sp|P21657|DAL81_YEAST	DAL81	Transcriptional activator protein DAL81	7	5.19889	5.19888	5.24982	7.16819	6.84999	7.09447	9.28661	9.26379	9.25862	11.9035	12.2178	11.3095
sp|P21705|DAL82_YEAST	DAL82	Protein DAL82	2	9.59547	10.5992	8.48601	9.45997	8.60066	8.4488	6.64898	7.63578	7.51711	7.19228	7.99402	7.8217
sp|P53267|DAM1_YEAST	DAM1	DASH complex subunit DAM1	5	6.95986	5.98897	6.65465	10.1013	9.1492	8.55077	8.07057	7.44121	9.38204	8.56818	8.72562	10.4076
sp|Q12091|DAP1_YEAST	DAP1	Damage response protein 1	9	10.2165	9.45103	9.65577	8.11657	7.75014	6.4518	8.32233	11.2472	9.82025	7.28715	5.73858	5.9427
sp|P18962|DAP2_YEAST	DAP2	Dipeptidyl aminopeptidase B	12	12.066	11.8055	11.9627	7.21326	7.36145	7.85814	7.49339	7.58704	7.72066	6.07518	6.31419	6.54248
sp|P47005|DAS1_YEAST	DAS1	F-box protein DAS1	3	6.37146	6.16329	7.28424	6.98194	8.61056	7.58846	10.4782	9.13043	9.02977	8.7345	10.0625	9.56468
sp|Q12084|DAS2_YEAST	DAS2	Putative uridine kinase DAS2	4	6.46202	5.61032	5.68968	5.44873	5.99882	5.68283	11.3056	11.8712	10.6999	10.4396	10.8145	9.9768
sp|P22204|DBF2_YEAST	DBF2	Cell cycle protein kinase DBF2	6	6.12335	6.1464	6.67077	5.68099	5.90142	5.7996	11.2339	11.2495	10.6658	10.0843	10.8885	9.55552
sp|P32328|DBF20_YEAST	DBF20	Serine/threonine-protein kinase DBF20	4	6.81799	8.49638	7.94602	7.49552	8.23012	8.33418	8.57128	9.11719	9.09744	8.92169	8.39395	8.57824
sp|P32325|DBF4_YEAST	DBF4	DDK kinase regulatory subunit DBF4	1	3.55413	4.56023	3.44538	3.61138	3.4199	2.0887	12.6887	12.1899	13.6298	11.8316	13.5851	15.3952
sp|P24784|DBP1_YEAST	DBP1	ATP-dependent RNA helicase DBP1	17	15.7291	15.6447	15.6738	12.8585	13.1103	12.8143	2.2178	2.28429	2.34258	2.50146	2.37516	2.44798
sp|Q12389|DBP10_YEAST	DBP10	ATP-dependent RNA helicase DBP10	32	6.79751	6.65181	6.74177	4.86362	5.17681	5.04005	11.0404	10.7131	10.5025	10.6791	10.9393	10.854
sp|P24783|DBP2_YEAST	DBP2	ATP-dependent RNA helicase DBP2	31	1.87222	1.82515	1.8527	2.9909	3.00394	2.89282	13.4551	13.5952	12.8107	15.308	15.0934	15.3
sp|P20447|DBP3_YEAST	DBP3	ATP-dependent RNA helicase DBP3	24	4.26979	4.18602	4.31535	2.9246	2.93722	2.8153	14.2974	14.0228	14.2639	11.917	12.1397	11.9108
sp|P20449|DBP5_YEAST	DBP5	ATP-dependent RNA helicase DBP5	29	7.20688	5.99226	6.06266	7.00174	7.95662	7.26735	9.00841	8.89456	8.81086	10.4936	10.7331	10.5719
sp|P53734|DBP6_YEAST	DBP6	ATP-dependent RNA helicase DBP6	17	3.9626	3.96809	3.90082	5.48905	5.49407	5.51976	10.8705	10.8179	10.8207	13.0973	12.9916	13.0676
sp|P36120|DBP7_YEAST	DBP7	ATP-dependent RNA helicase DBP7	14	6.29717	6.35435	6.26566	4.01185	4.29115	4.16348	12.4853	12.4278	12.1733	10.279	10.5852	10.6657
sp|P38719|DBP8_YEAST	DBP8	ATP-dependent RNA helicase DBP8	13	4.3595	4.39791	4.96658	5.02466	4.77767	4.98271	13.3514	12.7334	13.1269	10.7382	10.6824	10.8588
sp|Q06218|DBP9_YEAST	DBP9	ATP-dependent RNA helicase DBP9	20	6.2032	6.26838	6.06091	3.72936	3.7284	3.78288	12.2627	12.4932	12.2388	10.9413	11.0106	11.2803
sp|P24309|DBR1_YEAST	DBR1	Lariat debranching enzyme	3	8.57865	8.73987	9.37909	5.92309	6.6671	6.75219	8.90283	9.28313	8.91089	9.28576	9.04024	8.53715
sp|P25559|DCC1_YEAST	DCC1	Sister chromatid cohesion protein DCC1	3	7.97197	7.22438	7.52243	9.36761	9.68256	9.56944	9.01467	8.12013	8.37816	8.10963	7.49097	7.54805
sp|P06773|DCTD_YEAST	DCD1	Deoxycytidylate deaminase	4	5.10929	5.01132	4.6481	6.7516	6.73654	6.55753	10.9967	10.9059	9.87015	11.1237	11.2775	11.0117
sp|P32460|DCG1_YEAST	DCG1	Protein DCG1	5	11.8171	12.1408	11.8392	3.56233	3.53265	3.34979	11.1155	11.6482	11.3377	6.36802	6.7552	6.53359
sp|Q08558|DCI1_YEAST	DCI1	Delta(3,5)-Delta(2,4)-dienoyl-CoA isomerase	3	22.0584	21.1037	22.4901	5.44289	5.71319	5.49799	4.22234	4.96692	4.82791	0.954191	1.42307	1.29936
sp|Q06409|DCK1_YEAST	DCK1	DOCK-like protein 1	7	7.13559	7.20715	7.62259	9.83306	10.8042	10.0497	7.30891	7.3873	6.96652	8.79906	8.54325	8.34267
sp|Q12395|DCN1_YEAST	DCN1	Defective in cullin neddylation protein 1	6	6.93071	9.34986	9.76895	11.9795	9.34845	11.0648	6.99443	6.27473	6.83771	7.0417	6.96935	7.43978
sp|Q12517|DCP1_YEAST	DCP1	mRNA-decapping enzyme subunit 1	9	5.4425	5.31768	5.66146	7.0976	6.20697	6.51086	9.81891	10.2099	9.68726	9.91016	11.1151	13.0216
sp|P53550|DCP2_YEAST	DCP2	m7GpppN-mRNA hydrolase	26	5.72401	5.55168	5.5549	7.40711	7.42638	7.3829	9.20861	9.0653	9.01747	11.1962	11.5328	10.9326
sp|Q05924|DCR2_YEAST	DCR2	Phosphatase DCR2	5	7.31437	7.74671	7.03937	8.5747	8.96255	9.37704	8.90593	8.5745	7.94217	8.65871	8.71431	8.18964
sp|Q06151|DCPS_YEAST	DCS1	m7GpppX diphosphatase	33	12.8646	12.6111	12.6019	12.5039	12.9618	12.7138	3.59306	3.71287	3.83766	4.1896	4.22525	4.18435
sp|Q12123|DCS2_YEAST	DCS2	Inactive diphosphatase DCS2	25	17.3015	16.9927	16.7751	12.234	12.2569	12.1567	2.58737	2.44574	2.6922	1.6381	1.46798	1.45175
sp|P36091|DCW1_YEAST	DCW1	Mannan endo-1,6-alpha-mannosidase DCW1	1	5.07928	4.88094	5.27469	4.59167	4.17374	5.85358	12.4991	14.2234	13.5771	8.29432	9.83331	11.7188
sp|Q08949|DDC1_YEAST	DDC1	DNA damage checkpoint protein 1	3	8.38133	7.9632	9.36357	7.90216	7.24607	7.44083	8.48714	9.03326	9.28278	8.40011	7.84292	8.65663
sp|P40087|DDI1_YEAST	DDI1	DNA damage-inducible protein 1	14	10.6473	11.2632	10.4113	7.64798	7.69013	7.32033	8.66392	8.44165	7.94294	6.61311	6.77715	6.58095
sp|Q99321|DDP1_YEAST	DDP1	Diphosphoinositol polyphosphate phosphohydrolase DDP1	9	10.882	10.399	10.8246	10.3916	10.1776	10.7841	5.43514	5.49587	5.38098	6.8866	6.80631	6.53623
sp|P18899|DDR48_YEAST	DDR48	Stress protein DDR48	16	12.4854	11.8167	13.1608	13.9335	13.833	14.1971	2.18018	2.52476	2.39981	4.3071	4.42012	4.74146
sp|P06634|DED1_YEAST	DED1	ATP-dependent RNA helicase DED1	21	2.09158	2.03366	2.0565	4.93062	4.57995	4.42312	12.0343	11.1955	12.2225	14.0697	14.5752	15.7873
sp|P38707|SYNC_YEAST	DED81	Asparagine--tRNA ligase, cytoplasmic	39	5.2958	5.20858	5.12185	7.49331	7.45711	7.33889	9.83924	9.6788	9.72882	10.7611	10.8901	11.1863
sp|P35732|DEF1_YEAST	DEF1	RNA polymerase II degradation factor 1	23	5.99666	6.08884	5.98207	4.53438	4.80298	4.78613	11.7637	11.8388	12.1949	10.6949	10.6833	10.6333
sp|P31115|PUS3_YEAST	DEG1	tRNA pseudouridine(38/39) synthase	10	5.82213	5.8427	5.72815	7.36516	6.86771	6.43706	10.9303	10.4253	10.9595	9.8643	9.4285	10.3292
sp|P31385|DEP1_YEAST	DEP1	Transcriptional regulatory protein DEP1	6	7.50957	7.49967	7.41285	8.21784	8.40332	8.47745	8.83684	8.99858	8.95843	8.33979	8.53442	8.81124
sp|Q99288|DET1_YEAST	DET1	Broad-range acid phosphatase DET1	6	9.04379	8.45204	8.25114	10.283	10.0904	9.52446	7.27995	7.05968	7.19911	7.26604	7.47549	8.07487
sp|Q05031|DFG5_YEAST	DFG5	Mannan endo-1,6-alpha-mannosidase DFG5	2	6.18048	7.11078	6.9777	5.82401	6.23733	5.82905	11.9224	11.6708	11.6245	8.42558	9.12446	9.07292
sp|Q12743|DFM1_YEAST	DFM1	DER1-like family member protein 1	6	7.90422	8.42212	8.53304	5.87978	6.0664	5.94131	6.52367	7.27973	7.75087	7.73314	6.79872	21.167
sp|P07807|DYR_YEAST	DFR1	Dihydrofolate reductase	4	6.50715	6.81712	6.12873	7.79573	8.11071	8.19998	7.18163	8.00656	7.07736	11.0311	11.6441	11.4998
sp|Q08650|DGAT2_YEAST	DGA1	Diacylglycerol O-acyltransferase 1	3	12.1296	12.0449	12.1482	10.9267	10.5707	10.5855	5.50449	5.37966	5.23691	5.34141	4.78509	5.34696
sp|Q12382|DGK1_YEAST	DGK1	CTP-dependent diacylglycerol kinase 1	4	7.23399	7.409	6.83814	8.33681	9.16288	8.90528	9.23248	8.45047	7.78031	8.93593	9.17002	8.5447
sp|P32330|DGR2_YEAST	DGR2	2-deoxy-glucose resistant protein 2	3	10.1926	10.7702	11.6423	9.62343	7.91072	7.16356	8.95481	7.87425	6.97708	6.24008	6.60186	6.04914
sp|P39517|DHH1_YEAST	DHH1	ATP-dependent RNA helicase DHH1	15	3.17514	3.31876	3.19299	7.43025	7.76758	7.3825	9.01484	8.46908	9.04375	13.6121	13.893	13.7
sp|P36009|DHR2_YEAST	DHR2	Probable ATP-dependent RNA helicase DHR2	8	4.93549	4.89036	4.92887	4.25686	4.34692	4.28191	11.5068	11.5938	11.8401	12.3039	12.7907	12.3242
sp|P54005|DIA1_YEAST	DIA1	Protein DIA1	2	10.7544	11.3955	9.65481	3.70797	4.59071	4.81899	14.1984	15.2633	13.8112	3.3038	4.14447	4.35651
sp|P38705|SYSM_YEAST	DIA4	Serine--tRNA ligase, mitochondrial	10	12.506	13.3073	12.812	7.72986	7.50171	7.76965	8.73149	8.04431	8.47834	4.1787	4.35793	4.58268
sp|Q06819|DIB1_YEAST	DIB1	Spliceosomal protein DIB1	3	7.06795	6.89523	6.17584	11.4907	11.5837	10.4692	7.25697	7.48175	6.18088	8.91749	8.64014	7.84018
sp|Q06143|DIC1_YEAST	DIC1	Mitochondrial dicarboxylate transporter	8	12.5285	13.9579	13.9492	7.38859	8.02944	7.91563	7.01306	7.05117	6.47401	5.24684	5.34337	5.1023
sp|P69771|DID2_YEAST	DID2	Vacuolar protein-sorting-associated protein 46	17	6.00212	5.79268	5.88936	5.83032	6.14929	5.57083	12.6293	12.8296	12.471	8.63136	9.15135	9.05278
sp|P36108|DID4_YEAST	DID4	DOA4-independent degradation protein 4	4	6.95862	7.26487	6.3202	9.71321	8.68052	8.33473	8.53915	9.53302	8.36901	9.60108	8.09328	8.59233
sp|P50076|ALG10_YEAST	DIE2	Dol-P-Glc:Glc(2)Man(9)GlcNAc(2)-PP-Dol alpha-1,2-glucosyltransferase	2	8.14686	9.6829	9.75637	8.98278	8.98054	8.11001	8.34087	8.12899	8.18682	7.43821	7.18139	7.06427
sp|Q03063|DIG1_YEAST	DIG1	Down-regulator of invasive growth 1	5	4.32909	4.31752	4.40194	6.66604	6.76237	6.92339	10.0192	10.1155	10.6771	11.5447	12.1879	12.0552
sp|Q03373|DIG2_YEAST	DIG2	Down-regulator of invasive growth 2	1	6.46438	5.12714	6.94571	5.48723	6.22843	7.3831	7.33953	10.4887	10.7957	11.6713	11.0758	10.9929
sp|P41819|DIM1_YEAST	DIM1	Dimethyladenosine transferase	21	3.29363	3.31308	3.45041	3.59909	3.77873	3.62916	13.4916	13.0565	13.1222	13.0551	13.3364	12.8742
sp|Q12086|DIN7_YEAST	DIN7	DNA damage-inducible protein DIN7	1	20.4188	18.1994	23.6536	4.5079	4.77459	5.34264	5.22698	4.5633	5.67815	2.69509	2.56886	2.37069
sp|Q12220|UTP12_YEAST	DIP2	U3 small nucleolar RNA-associated protein 12	24	5.095	5.0166	5.20474	4.98194	5.45037	5.18388	11.5361	12.0251	11.5677	11.3711	11.1701	11.3974
sp|P53388|DIP5_YEAST	DIP5	Dicarboxylic amino acid permease	8	9.99498	10.6374	10.1834	2.59499	2.50222	2.98245	11.2298	11.2852	10.8882	9.5821	9.32213	8.7971
sp|Q08162|RRP44_YEAST	DIS3	Exosome complex exonuclease DIS3	26	6.45433	6.27063	6.41209	6.64831	6.65767	6.45787	10.009	10.1169	10.1795	10.3376	10.2225	10.2335
sp|P40564|DJP1_YEAST	DJP1	DnaJ-like protein 1	11	5.0602	5.00909	4.8407	6.9208	7.1001	6.88449	11.7948	11.6403	11.1381	9.81172	9.8698	9.9299
sp|P32891|DLD1_YEAST	DLD1	D-lactate dehydrogenase [cytochrome] 1, mitochondrial	25	14.7002	14.2407	13.8227	10.4625	10.4659	10.5934	5.43457	5.15078	5.36559	3.40739	3.16366	3.19268
sp|P46681|DLD2_YEAST	DLD2	D-2-hydroxyglutarate--pyruvate transhydrogenase DLD2	20	10.6038	10.6723	10.9033	10.4307	10.5279	10.5452	6.81612	6.70862	6.7983	5.34086	5.41598	5.23699
sp|P39976|DLD3_YEAST	DLD3	D-2-hydroxyglutarate--pyruvate transhydrogenase DLD3	23	7.85048	7.66594	7.76704	3.29954	3.19124	3.29314	14.6748	14.87	15.1268	7.06292	7.33847	7.8597
sp|P38823|DMA1_YEAST	DMA1	E3 ubiquitin-protein ligase DMA1	3	7.28817	7.96234	7.53321	3.97183	4.75948	4.51075	11.0929	11.1411	10.4418	11.2445	10.057	9.99696
sp|P53924|DMA2_YEAST	DMA2	E3 ubiquitin-protein ligase DMA2	3	9.66278	10.4028	11.0696	6.93986	8.09875	7.55621	8.16774	7.1706	8.02264	6.87998	7.6659	8.36312
sp|Q03652|DML1_YEAST	DML1	Protein DML1	4	7.61465	6.65764	7.11814	6.97366	7.14832	6.70038	10.412	9.97465	11.067	8.61204	8.28706	9.43448
sp|P38859|DNA2_YEAST	DNA2	DNA replication ATP-dependent helicase/nuclease DNA2	5	6.2526	6.63791	6.32315	7.89799	7.38191	8.21052	9.48149	9.10295	8.58893	10.2055	9.97645	9.94059
sp|P32660|ATC5_YEAST	DNF1	Phospholipid-transporting ATPase DNF1	22	10.7256	10.9229	10.9471	6.37984	6.43448	6.38364	7.40497	6.92429	7.20688	8.65264	9.09158	8.92605
sp|Q12675|ATC4_YEAST	DNF2	Phospholipid-transporting ATPase DNF2	14	7.84078	7.69331	7.92434	4.17807	4.29415	4.5428	10.9684	10.2703	10.3131	10.6852	10.4763	10.8133
sp|Q12674|ATC8_YEAST	DNF3	Probable phospholipid-transporting ATPase DNF3	11	10.6614	11.0027	11.2247	5.67717	5.235	5.37024	8.70366	8.83926	8.41049	8.81839	7.89872	8.15834
sp|Q08387|DNLI4_YEAST	DNL4	DNA ligase 4	1	8.32878	10.2998	12.2529	11.7197	13.4012	12.6884	6.69774	5.07285	5.65808	4.57689	2.94028	6.36349
sp|P54861|DNM1_YEAST	DNM1	Dynamin-related protein DNM1	19	9.68296	9.6669	9.77612	10.2562	10.3699	10.2962	7.05035	6.66616	6.49775	6.629	6.62305	6.4854
sp|P36037|DOA1_YEAST	DOA1	Protein DOA1	29	10.8064	11.0029	10.9817	7.7765	8.35563	8.27404	7.46978	7.40271	7.68734	6.84381	6.56123	6.83795
sp|P32571|UBP4_YEAST	DOA4	Ubiquitin carboxyl-terminal hydrolase 4	3	8.95739	9.06236	9.97309	9.93701	10.2093	9.67457	6.11541	6.4978	6.11819	8.17601	7.61793	7.66095
sp|P53068|APC10_YEAST	DOC1	Anaphase-promoting complex subunit DOC1	1	6.52472	7.20242	7.93645	9.21413	11.2268	11.2771	7.82888	5.27498	7.34097	9.66605	8.15456	8.35296
sp|P38774|DOG1_YEAST	DOG1	2-deoxyglucose-6-phosphate phosphatase 1	1	10.0507	10.9337	8.56021	7.74249	7.45833	8.49383	9.83786	8.78976	7.08531	8.1325	6.40357	6.51172
sp|P38773|DOG2_YEAST	DOG2	2-deoxyglucose-6-phosphate phosphatase 2	3	8.68882	8.73467	8.74816	11.7226	12.1233	13.8107	6.1577	5.6085	5.46263	6.51365	6.11725	6.31201
sp|P33309|DOM34_YEAST	DOM34	Protein DOM34	14	6.19992	5.93843	5.95544	6.81465	7.08364	6.73531	10.2694	10.68	10.2383	9.65872	10.0345	10.3916
sp|Q03921|DOP1_YEAST	DOP1	Protein dopey	26	9.41272	9.09697	9.47437	8.73372	9.18751	9.3678	6.7865	6.48532	6.64073	8.251	8.22854	8.33481
sp|P54858|DOS2_YEAST	DOS2	Protein DOS2	12	8.16098	7.90351	7.23873	9.15768	8.98569	9.63479	6.84454	7.44012	7.56499	8.77097	8.96307	9.33494
sp|Q04089|DOT1_YEAST	DOT1	Histone-lysine N-methyltransferase, H3 lysine-79 specific	7	8.03682	7.52069	7.80091	6.86421	6.57713	6.10295	10.3262	9.99243	9.38023	8.53076	9.74796	9.11973
sp|P40553|DOT5_YEAST	DOT5	Peroxiredoxin DOT5	15	8.51921	8.32367	7.87356	6.70538	6.75341	6.90866	10.1134	10.1101	10.3734	7.98052	8.16391	8.17481
sp|P40059|DOT6_YEAST	DOT6	Transcriptional regulatory protein DOT6	6	0.941983	0.954143	1.18821	1.37512	1.36799	1.31334	9.31204	9.83602	9.08797	21.5342	21.8083	21.2807
sp|P47027|DPB11_YEAST	DPB11	DNA replication regulator DPB11	1	2.91411	3.18732	3.15711	8.17978	6.77474	7.34961	11.4833	9.76532	11.9854	11.1798	12.6559	11.3677
sp|P24482|DPB2_YEAST	DPB2	DNA polymerase epsilon subunit B	9	4.24536	4.4571	4.2278	6.75875	6.33417	5.95478	11.7869	11.4429	12.0718	10.8194	10.6649	11.2362
sp|P27344|DPB3_YEAST	DPB3	DNA polymerase epsilon subunit C	1	4.24545	4.68395	3.71756	4.82788	4.74156	5.03171	12.1911	12.4918	10.8357	12.5753	12.6771	11.9809
sp|Q04603|DPB4_YEAST	DPB4	DNA polymerase epsilon subunit D	9	5.89361	6.23937	5.93494	7.09648	7.32206	7.14511	9.89132	9.7264	9.47449	10.4221	10.5478	10.3063
sp|P40487|DPH1_YEAST	DPH1	2-(3-amino-3-carboxypropyl)histidine synthase subunit 1	14	5.62319	5.61157	5.56305	6.6454	6.44721	6.28707	10.669	10.4575	10.8517	10.0958	10.6742	11.0744
sp|P32461|DPH2_YEAST	DPH2	2-(3-amino-3-carboxypropyl)histidine synthase subunit 2	5	4.61021	4.49109	4.97246	5.78306	5.66192	5.79237	10.84	10.5267	11.8866	11.9883	11.3689	12.0784
sp|P32469|DPH5_YEAST	DPH5	Diphthine methyl ester synthase	11	7.17285	7.41551	7.20089	7.6035	8.44248	8.28717	8.31609	8.43109	7.88176	10.3439	9.52371	9.38107
sp|Q12429|DPH6_YEAST	DPH6	Diphthine--ammonia ligase	9	6.28008	6.38578	6.29524	7.30808	7.3222	7.18159	9.48073	9.27529	9.77465	10.1961	10.1357	10.3645
sp|Q05567|SGPL_YEAST	DPL1	Sphingosine-1-phosphate lyase	23	10.1462	9.81973	10.2098	9.23092	9.27789	9.2624	6.9541	6.66	6.78034	7.17733	7.18812	7.29316
sp|P14020|DPM1_YEAST	DPM1	Dolichol-phosphate mannosyltransferase	16	8.17871	8.2735	8.11474	9.08133	9.68799	9.70114	8.14445	8.54071	7.88407	7.73735	7.41025	7.24575
sp|Q05521|DPP1_YEAST	DPP1	Diacylglycerol pyrophosphate phosphatase 1	4	14.6677	14.9445	15.2141	8.16267	7.94209	8.52008	5.14997	5.2532	5.14868	4.70092	5.1154	5.18068
sp|P04802|SYDC_YEAST	DPS1	Aspartate--tRNA ligase, cytoplasmic	38	7.85233	7.94546	7.94781	9.18861	9.44541	9.55279	7.86039	7.75725	7.68462	8.2761	8.36699	8.12224
sp|P36152|DRE2_YEAST	DRE2	Fe-S cluster assembly protein DRE2	11	2.78747	2.64136	2.4451	2.46344	2.60816	2.40084	17.0554	17.5031	17.1725	11.1739	10.8391	10.9096
sp|P53255|DRN1_YEAST	DRN1	CWF19-like protein DRN1	8	8.2682	8.81859	8.61012	6.13875	6.2611	6.00897	10.0178	10.3533	9.84086	8.59522	8.88084	8.20629
sp|P32892|DRS1_YEAST	DRS1	ATP-dependent RNA helicase DRS1	28	2.82763	2.85781	2.84673	4.76847	4.7428	4.79183	11.9385	11.5297	12.3711	13.7105	13.6415	13.9734
sp|P39524|ATC3_YEAST	DRS2	Probable phospholipid-transporting ATPase DRS2	19	7.88496	8.33656	8.53608	6.85228	7.45252	6.95271	8.05047	7.98044	7.88254	10.0424	10.1624	9.86657
sp|Q08232|DSC2_YEAST	DSC2	DSC E3 ubiquitin ligase complex subunit 2	1	3.12155	3.29693	3.33856	4.15372	4.78532	4.68392	13.3001	13.6846	14.1798	12.5829	12.8143	10.0583
sp|Q12015|DSC3_YEAST	DSC3	DSC E3 ubiquitin ligase complex subunit 3	3	13.1316	13.2657	12.5129	9.63709	10.2281	9.94157	5.66006	5.01208	5.70013	4.92626	4.87966	5.10492
sp|P53095|DSD1_YEAST	DSD1	D-serine dehydratase	4	14.8021	14.3839	13.7979	9.46424	9.7134	9.89967	4.92723	4.75105	5.51184	4.26834	4.28734	4.19301
sp|P53753|ENG1_YEAST	DSE4	Endo-1,3(4)-beta-glucanase 1	6	6.4344	6.54345	6.6996	6.67677	6.53224	6.02351	9.87529	9.00527	8.21475	10.9061	11.629	11.4596
sp|P38213|DSF2_YEAST	DSF2	Protein DSF2	3	3.96945	4.27646	3.57362	5.02424	4.80651	4.52951	12.6733	12.3044	12.8778	11.2161	12.1504	12.5981
sp|P48510|DSK2_YEAST	DSK2	Ubiquitin domain-containing protein DSK2	9	5.55884	5.39541	5.37133	6.93654	6.70557	6.318	10.1477	10.6525	10.2357	10.406	10.9193	11.3531
sp|P53847|DSL1_YEAST	DSL1	Protein transport protein DSL1	17	8.32891	9.32044	8.37564	7.64133	8.0357	8.12086	8.50099	8.14001	7.6912	9.02687	8.34831	8.46974
sp|P40568|DSN1_YEAST	DSN1	Kinetochore-associated protein DSN1	1	4.80735	5.49218	5.10701	6.43759	7.02843	7.29676	10.3438	8.36225	9.67288	11.8419	11.9937	11.6162
sp|P39112|DSS1_YEAST	DSS1	Exoribonuclease II, mitochondrial	8	9.63953	9.94752	9.64749	9.34403	9.40351	9.66951	8.60404	8.98526	8.58413	5.47678	5.17483	5.52339
sp|P32601|DSS4_YEAST	DSS4	Protein DSS4	4	2.35836	2.19893	2.22629	6.59107	6.12953	5.74729	13.1459	13.6728	13.4671	11.2699	11.2469	11.9459
sp|P07273|TFS2_YEAST	DST1	Transcription elongation factor S-II	17	4.98172	5.10057	5.15622	6.8417	6.90491	7.12171	10.7959	10.7743	10.561	10.6854	10.619	10.4576
sp|Q07648|DTD_YEAST	DTD1	D-aminoacyl-tRNA deacylase	11	5.89585	6.17017	6.18447	8.82701	9.44164	9.17388	8.77255	8.63374	8.25006	9.86327	9.75346	9.0339
sp|Q99247|DUF1_YEAST	DUF1	DUB-associated factor 1	19	10.874	10.7655	11.0262	10.2917	10.6424	10.7717	6.03989	6.03912	6.02809	5.91466	6.01339	5.59331
sp|P43616|DUG1_YEAST	DUG1	Cys-Gly metallodipeptidase DUG1	37	6.79808	6.44027	6.60333	11.2533	11.0195	10.712	6.81748	7.0346	7.20644	8.81367	8.63926	8.66201
sp|P38149|DUG2_YEAST	DUG2	Probable di- and tripeptidase DUG2	15	6.0375	5.89212	5.91424	7.4805	7.49777	7.37555	10.0813	10.0655	9.70822	10.1701	10.0487	9.72841
sp|P53871|DUG3_YEAST	DUG3	Probable glutamine amidotransferase DUG3	4	3.59197	3.13137	3.48623	6.43894	5.8275	5.45555	11.0449	11.5024	10.9465	13.192	12.4851	12.8975
sp|P39009|DUN1_YEAST	DUN1	DNA damage response protein kinase DUN1	8	6.24877	6.2858	6.11563	5.67281	5.84836	5.50936	12.0652	12.0914	12.5823	9.21089	9.04429	9.32521
sp|P53168|DUO1_YEAST	DUO1	DASH complex subunit DUO1	3	4.9012	4.34507	5.39026	7.09927	6.39246	6.64267	9.49779	9.06516	9.62	12.1195	12.4829	12.4438
sp|P32528|DUR1_YEAST	DUR1,2	Urea amidolyase	35	3.55223	3.46887	3.67646	20.935	20.8865	20.5931	2.27442	2.11567	2.38995	6.72983	6.76292	6.61495
sp|P53759|DUS1_YEAST	DUS1	tRNA-dihydrouridine(16/17) synthase [NAD(P)(+)]	7	5.3427	5.71727	4.94078	4.71302	4.52124	4.40932	13.3913	13.7554	14.4026	8.93871	9.93796	9.92966
sp|Q06053|DUS3_YEAST	DUS3	tRNA-dihydrouridine(47) synthase [NAD(P)(+)]	21	5.94655	5.54174	5.63187	6.00833	5.9391	6.06454	10.6074	10.5654	11.0168	10.9207	10.9559	10.8018
sp|Q06063|DUS4_YEAST	DUS4	tRNA-dihydrouridine(20a/20b) synthase [NAD(P)+]	6	6.55766	6.76219	6.82587	5.97813	6.37466	5.82559	11.2933	9.88845	10.4813	10.6627	9.70121	9.64899
sp|P33317|DUT_YEAST	DUT1	Deoxyuridine 5'-triphosphate nucleotidohydrolase	11	5.75863	5.90306	5.70486	6.2091	6.14265	6.04415	10.3769	10.3934	10.5787	10.9598	10.8547	11.074
sp|P36022|DYHC_YEAST	DYN1	Dynein heavy chain, cytoplasmic	4	14.0763	14.0506	13.5187	7.4907	7.11636	7.17063	5.72548	5.23415	5.49743	7.06294	6.13807	6.91857
sp|Q02647|DYL1_YEAST	DYN2	Dynein light chain 1, cytoplasmic	6	10.3776	10.8805	10.7351	8.59687	8.34975	9.13063	6.97189	6.84846	7.02918	6.98555	7.03621	7.05831
sp|P38791|DHYS_YEAST	DYS1	Deoxyhypusine synthase	27	5.80401	4.78233	4.9695	6.87754	7.88294	6.91254	8.98179	9.22281	8.8288	11.8125	12.0793	11.8459
sp|Q06337|EAF1_YEAST	EAF1	Chromatin modification-related protein EAF1	6	6.1919	6.32825	6.30272	7.08964	7.26149	6.61104	10.0136	9.95485	9.69555	9.70829	11.0181	9.82465
sp|Q12432|EAF3_YEAST	EAF3	Chromatin modification-related protein EAF3	12	7.28641	7.60732	7.85357	8.22655	8.5856	8.12603	8.45917	8.70052	8.42546	9.12949	8.6162	8.9837
sp|P39995|EAF5_YEAST	EAF5	Chromatin modification-related protein EAF5	3	4.81503	5.14765	5.30043	7.1613	7.23001	6.63505	10.4568	10.2963	10.11	10.8025	11.8335	10.2114
sp|P53911|EAF7_YEAST	EAF7	Chromatin modification-related protein EAF7	3	5.74299	6.56222	6.07085	7.59162	8.09876	8.91277	8.88111	10.071	9.48425	9.51631	9.05808	10.01
sp|P36041|EAP1_YEAST	EAP1	Protein EAP1	23	9.89661	10.1811	10.0947	8.11077	8.21498	8.13262	8.14126	8.15846	8.33665	6.7757	6.92955	7.02761
sp|Q03212|EAR1_YEAST	EAR1	Protein EAR1	6	10.7227	11.3002	10.9524	5.2945	5.94728	6.16157	9.70573	9.29949	8.85957	7.5663	7.37522	6.81504
sp|P36049|EBP2_YEAST	EBP2	rRNA-processing protein EBP2	25	5.26065	5.3918	5.44185	5.10264	5.19033	5.22846	12.058	12.1518	11.6514	11.1937	10.8282	10.5012
sp|Q03466|EBS1_YEAST	EBS1	Protein EBS1	14	7.66907	7.71725	7.86983	5.14615	5.26605	5.09827	10.8199	10.7341	10.5794	9.39249	9.41534	10.2921
sp|Q05871|ECI1_YEAST	ECI1	3,2-trans-enoyl-CoA isomerase	4	18.1429	17.5587	18.235	6.52723	7.0063	6.86819	5.09515	5.14392	5.15919	3.45463	3.64562	3.16316
sp|P39715|ECM1_YEAST	ECM1	Shuttling pre-60S factor ECM1	13	1.84656	1.69831	1.77209	2.30667	2.30598	2.43329	14.9734	14.4882	14.2477	14.4024	14.7506	14.7748
sp|P39987|HSP7E_YEAST	ECM10	Heat shock protein SSC3, mitochondrial	6	13.356	13.1798	13.2619	15.8028	15.8112	15.005	2.25876	1.93077	2.74004	2.23283	2.23658	2.18433
sp|P38836|ECM14_YEAST	ECM14	Putative metallocarboxypeptidase ECM14	9	10.2483	10.2659	10.351	11.1449	10.4888	10.7985	5.34324	5.14249	5.70683	6.46678	6.74844	7.29481
sp|P35195|ECM15_YEAST	ECM15	UPF0045 protein ECM15	1	11.4375	9.23052	9.51994	18.224	13.1484	11.0241	2.75817	2.91052	4.547	5.02824	5.69941	6.47222
sp|Q04217|DHR1_YEAST	ECM16	Probable ATP-dependent RNA helicase DHR1	35	3.30865	3.42186	3.26386	7.05141	7.17871	6.91187	6.71134	6.69071	6.39246	17.3329	15.9844	15.7518
sp|Q04623|ECM18_YEAST	ECM18	Protein ECM18	1	4.99928	5.50128	5.74217	11.6451	8.36467	10.0544	10.6808	8.99269	13.2883	6.76595	7.46758	6.49776
sp|P38241|SLT11_YEAST	ECM2	Pre-mRNA-splicing factor SLT11	6	6.7316	6.75083	6.84843	8.23601	8.30882	8.14333	9.17198	8.71139	9.4709	9.60431	9.36053	8.66188
sp|P38167|ECM21_YEAST	ECM21	Protein ECM21	12	10.9914	10.7828	10.8744	9.5814	9.80308	10.0901	6.59265	6.45053	6.43869	6.06888	6.19642	6.1296
sp|Q05958|ECM22_YEAST	ECM22	Sterol regulatory element-binding protein ECM22	3	2.70224	2.15331	2.37633	7.44274	7.84556	8.13907	5.1373	5.14421	5.87546	17.3909	18.0129	17.7799
sp|P32525|ECM25_YEAST	ECM25	Protein ECM25	9	2.28515	2.39468	2.46083	7.82765	7.56182	7.42881	10.8799	10.1552	11.4491	12.0915	12.6678	12.7974
sp|P47144|ECM27_YEAST	ECM27	Protein ECM27	1	15.4924	14.9747	16.6642	2.14908	1.50513	4.73359	4.99398	6.09676	7.65649	8.9974	6.96078	9.77537
sp|P38737|ECM29_YEAST	ECM29	Proteasome component ECM29	21	7.9526	7.70629	7.73085	6.85773	7.22817	7.19827	7.50449	7.62227	7.43581	11.2552	10.9042	10.6041
sp|Q99252|ECM3_YEAST	ECM3	Protein ECM3	1	6.83589	7.03774	8.06363	11.6041	12.1977	13.6154	6.53438	7.59629	6.78283	6.46914	6.88594	6.37706
sp|Q06673|ECM30_YEAST	ECM30	Protein ECM30	8	7.25071	8.11919	8.57673	12.513	12.7265	13.1589	5.28132	5.30749	5.59159	7.36423	7.00056	7.10979
sp|P38122|PANB_YEAST	ECM31	3-methyl-2-oxobutanoate hydroxymethyltransferase	5	11.4588	11.5254	11.5503	8.85286	8.82864	8.94355	6.48801	6.77986	6.84263	6.25077	6.11982	6.35942
sp|P32644|ECM32_YEAST	ECM32	Putative ATP-dependent RNA helicase ECM32	14	4.94211	5.02745	4.89153	6.17994	6.60863	6.67961	9.18354	9.83245	8.81101	12.5197	12.6377	12.6864
sp|P38248|ECM33_YEAST	ECM33	Cell wall protein ECM33	18	8.80344	8.63478	8.8758	6.43128	6.65394	6.7807	9.81614	9.87579	9.60967	8.30472	8.14254	8.07121
sp|Q05902|ECM38_YEAST	ECM38	Glutathione hydrolase proenzyme	12	18.0352	19.04	18.5262	3.06315	2.93995	3.30662	7.97439	7.87072	8.03948	3.90167	3.62456	3.67805
sp|P36156|GTO2_YEAST	ECM4	Glutathione S-transferase omega-like 2	29	22.8663	24.1302	23.7004	5.24344	5.0541	5.56137	3.55793	3.48503	3.63364	0.940331	0.863225	0.964013
sp|P33412|ECT1_YEAST	ECT1	Ethanolamine-phosphate cytidylyltransferase	5	6.0771	5.86269	6.00134	7.10694	7.20654	7.5522	9.58068	10.0174	9.26174	9.3563	10.9157	11.0614
sp|P53080|EDC1_YEAST	EDC1	Enhancer of mRNA-decapping protein 1	1	9.99175	8.85851	17.1425	10.8039	9.223	8.87888	4.9819	5.06428	5.17398	5.78393	6.25536	7.84203
sp|P39998|EDC3_YEAST	EDC3	Enhancer of mRNA-decapping protein 3	12	5.78785	6.14334	5.65991	6.35136	6.30021	6.4023	10.529	10.2241	10.3525	10.5424	10.6912	11.0159
sp|P34216|EDE1_YEAST	EDE1	EH domain-containing and endocytosis protein 1	34	7.91569	7.84727	7.62748	6.45997	6.50099	6.65952	9.85362	10.2633	9.85142	9.11274	9.06446	8.84352
sp|P32471|EF1B_YEAST	EFB1	Elongation factor 1-beta	32	2.85275	2.95049	2.75584	4.08301	3.85291	3.91693	12.9803	13.8424	14.1366	13.0942	12.688	12.8466
sp|Q3E705|EFG1P_YEAST	EFG1	rRNA-processing protein EFG1	9	3.04627	2.86588	2.7797	3.43355	3.70567	3.44233	16.0489	15.8278	15.932	10.8768	11.1687	10.8725
sp|P38732|EFM1_YEAST	EFM1	Protein-lysine N-methyltransferase EFM1	17	8.39316	8.66791	8.78783	6.95789	7.40182	7.23313	9.39163	9.54166	9.06453	8.19137	8.303	8.06607
sp|P38347|EFM2_YEAST	EFM2	Protein-lysine N-methyltransferase EFM2	3	4.58527	4.1491	5.47909	6.80417	5.67394	5.60688	11.0286	11.637	9.73414	11.6509	11.6288	12.0222
sp|P47163|EFM3_YEAST	EFM3	Protein-lysine N-methyltransferase EFM3	1	10.0077	9.88455	9.91978	5.77178	5.87143	6.3381	9.05137	8.49375	9.1571	8.9565	8.28248	8.26547
sp|P40516|EFM4_YEAST	EFM4	Protein-lysine N-methyltransferase EFM4	7	3.53565	3.83266	3.56216	6.29333	6.89457	6.0969	11.1968	12.1311	10.7986	11.7085	11.9824	11.9672
sp|P53200|EFM5_YEAST	EFM5	Protein-lysine N-methyltransferase EFM5	9	5.00428	4.76913	4.87024	5.85661	4.94738	5.28056	10.5112	10.0161	12.3523	10.8684	11.8105	13.7133
sp|Q03653|EFR3_YEAST	EFR3	Protein EFR3	22	7.59181	7.66637	7.73437	6.52557	6.53633	6.65358	9.11388	8.84228	9.28932	9.87345	9.80161	10.3714
sp|P32324|EF2_YEAST	EFT1	Elongation factor 2	57	4.51318	4.43524	4.42955	6.50701	6.32247	6.29038	10.7853	10.8603	10.967	11.5213	11.3821	11.9862
sp|Q02642|NACB1_YEAST	EGD1	Nascent polypeptide-associated complex subunit beta-1	25	2.89006	2.72685	2.69643	4.26332	3.96196	3.95131	13.6847	13.6346	14.5774	12.2779	12.6344	12.701
sp|P38879|NACA_YEAST	EGD2	Nascent polypeptide-associated complex subunit alpha	39	4.2113	4.27426	3.91702	5.18242	5.44405	5.15299	12.0035	12.5523	11.8287	12.0793	11.924	11.4302
sp|P40566|EGH1_YEAST	EGH1	Ergosteryl-beta-glucosidase	7	6.60151	6.67591	7.0326	8.66275	8.35178	8.05176	6.51381	6.17415	6.58353	12.6815	11.5841	11.0866
sp|P42835|EGT2_YEAST	EGT2	Protein EGT2	6	11.6239	13.393	11.5817	2.28625	2.2784	2.65035	11.8854	12.2628	10.6977	7.47251	7.25756	6.61032
sp|P28817|HIBCH_YEAST	EHD3	3-hydroxyisobutyryl-CoA hydrolase, mitochondrial	23	8.99193	8.85183	9.27888	11.6431	11.6044	11.5636	6.56297	6.34174	6.63126	6.35059	6.18416	5.99553
sp|P38295|MCFS2_YEAST	EHT1	Medium-chain fatty acid ethyl ester synthase/esterase 2	23	5.23049	5.41887	5.56854	11.9615	11.8769	11.7163	8.72884	8.6972	9.50189	7.27957	7.00987	7.01005
sp|Q05050|EIS1_YEAST	EIS1	Eisosome protein 1	36	10.456	10.5236	10.6499	10.8343	10.5558	10.7432	4.95735	4.95938	5.41564	6.9683	7.0467	6.88977
sp|Q03764|EKI1_YEAST	EKI1	Ethanolamine kinase	1	2.85792	3.17616	3.41602	4.88017	5.07427	5.2786	11.0999	11.4128	10.7489	15.1393	13.8319	13.084
sp|Q03071|ELOC_YEAST	ELC1	Elongin-C	4	10.8348	11.2101	10.7891	10.9642	9.4505	8.43726	6.07797	6.66431	6.79868	7.56398	5.80275	5.40627
sp|Q12050|ELG1_YEAST	ELG1	Telomere length regulation protein ELG1	1	0	2.56152	4.6721	5.82825	6.45195	6.12421	11.6394	12.5952	12.393	13.4232	12.4799	11.8313
sp|P32801|ELM1_YEAST	ELM1	Serine/threonine-protein kinase ELM1	1	9.69958	5.93155	5.77934	13.9079	8.48664	5.0751	12.9893	6.85293	9.75414	7.62794	6.54763	7.34801
sp|P25358|ELO2_YEAST	ELO2	Elongation of fatty acids protein 2	1	4.91027	6.8567	5.35512	6.16693	7.1921	6.71096	10.4024	10.3694	10.0669	12.0818	9.34014	10.5473
sp|P40319|ELO3_YEAST	ELO3	Elongation of fatty acids protein 3	6	4.9339	5.11304	5.44404	5.33736	5.65769	5.86494	11.4471	11.0237	11.5556	10.845	10.8959	11.8818
sp|P42935|ELP2_YEAST	ELP2	Elongator complex protein 2	25	6.10725	6.32101	6.06489	6.04545	6.62191	6.51464	10.0992	10.2141	9.87857	11.0524	10.7421	10.3384
sp|Q02908|ELP3_YEAST	ELP3	Elongator complex protein 3	16	5.44482	4.96461	5.0886	8.16232	7.44255	7.55631	10.2535	9.72205	10.8318	9.09274	10.0675	11.3732
sp|Q02884|ELP4_YEAST	ELP4	Elongator complex protein 4	10	6.51078	7.1301	6.73419	6.83065	6.68289	6.70533	9.60265	9.88104	9.7756	10.408	9.78606	9.95268
sp|Q04868|ELP6_YEAST	ELP6	Elongator complex protein 6	4	8.15051	8.58269	9.16482	6.72833	7.16904	7.505	9.04049	9.30047	9.44356	8.20973	8.31173	8.39364
sp|P25574|EMC1_YEAST	EMC1	ER membrane protein complex subunit 1	35	7.78701	8.28599	7.98304	9.36057	9.9327	9.84709	7.75298	7.97669	7.26547	8.17539	8.03728	7.59581
sp|Q12025|EMC10_YEAST	EMC10	Endoplasmic reticulum membrane protein complex subunit 10	8	8.92793	9.97044	9.21812	9.63677	9.895	10.4423	6.63641	6.78841	6.39341	7.58376	7.47674	7.03068
sp|P47133|EMC2_YEAST	EMC2	ER membrane protein complex subunit 2	14	6.55716	7.06199	6.77894	8.10267	8.75617	8.59289	9.20988	9.0798	8.39708	9.07711	9.19326	9.19305
sp|P36039|EMC3_YEAST	EMC3	ER membrane protein complex subunit 3	2	6.48135	10.5109	9.1284	6.05499	7.14371	8.33511	8.2251	7.43245	7.54777	9.94367	9.65521	9.54131
sp|P53073|EMC4_YEAST	EMC4	ER membrane protein complex subunit 4	9	7.11691	7.69491	7.47885	9.27297	9.52501	9.348	7.76986	7.63634	7.96464	8.86755	8.54222	8.78274
sp|P40540|EMC5_YEAST	EMC5	ER membrane protein complex subunit 5	8	7.20433	7.02939	7.22341	7.81354	8.43188	8.00205	9.46502	8.4163	9.20275	8.67925	8.99156	9.54052
sp|Q06287|NEP1_YEAST	EMG1	Ribosomal RNA small subunit methyltransferase NEP1	8	6.25323	6.08083	5.99635	5.19194	5.70001	5.35418	12.1898	12.0431	11.8513	9.69039	9.75782	9.89117
sp|Q04409|EMI2_YEAST	EMI2	Putative glucokinase-2	32	12.4807	12.489	12.1991	13.6968	13.4298	13.2216	3.2595	3.17834	3.3902	4.40515	4.18691	4.06295
sp|P32803|EMP24_YEAST	EMP24	Endosomal protein P24B	4	7.392	7.57467	6.94264	11.4472	11.6295	10.3745	7.50391	7.68497	7.44658	7.14935	7.5502	7.30443
sp|Q12396|EMP46_YEAST	EMP46	Protein EMP46	13	14.002	13.6645	14.152	12.8388	13.336	13.2017	3.25677	3.03758	3.25523	3.38948	2.85989	3.00599
sp|P43555|EMP47_YEAST	EMP47	Protein EMP47	19	8.05578	8.11544	8.34092	10.4525	10.1684	10.2113	6.89516	6.89365	7.07114	7.99576	7.97468	7.82536
sp|P40085|TAPT1_YEAST	EMP65	Endoplasmic reticulum membrane protein 65	1	6.58746	7.15326	6.56821	6.06128	4.31892	4.80515	11.7015	15.0284	8.4385	11.6749	9.41657	8.24596
sp|P32802|TMN1_YEAST	EMP70	Transmembrane 9 superfamily member 1	15	5.32319	5.6995	5.61581	6.63651	6.48112	6.59486	9.50636	9.96261	9.68588	11.5153	11.1758	11.803
sp|P42842|EMW1_YEAST	EMW1	Essential for maintenance of the cell wall protein 1	26	5.2206	5.40768	5.55313	5.9451	6.27411	6.19116	11.4484	11.2586	11.0906	10.5655	10.6166	10.4284
sp|P13587|ATN1_YEAST	ENA1	Sodium transport ATPase 1	1	27.0435	27.5739	27.076	2.99155	2.82739	4.06553	1.61449	1.75892	1.40099	1.25737	1.28288	1.10749
sp|Q08299|ENB1_YEAST	ENB1	Siderophore iron transporter ENB1	2	4.08208	3.94756	4.26763	7.49318	7.13708	6.88547	3.5717	4.40799	3.32098	18.4516	18.2205	18.2142
sp|P39013|END3_YEAST	END3	Actin cytoskeleton-regulatory complex protein END3	21	7.65608	7.50972	7.72592	8.35442	8.6657	8.20875	8.21374	8.28891	8.06926	9.45712	8.95627	8.89411
sp|P00924|ENO1_YEAST	ENO1	Enolase 1	14	15.3193	15.8035	14.6226	15.8536	12.6163	14.2389	2.31123	2.29139	2.41366	1.50335	1.47257	1.55359
sp|P00925|ENO2_YEAST	ENO2	Enolase 2	50	7.34374	6.95587	6.62799	6.73772	6.87176	6.89369	9.40443	10.3598	9.92966	9.71042	9.37277	9.79219
sp|P38333|ENP1_YEAST	ENP1	Essential nuclear protein 1	18	3.75757	3.77669	3.94953	3.36374	3.61041	3.34645	13.9811	14.176	13.7654	12.0719	11.7841	12.4171
sp|P48234|NOL10_YEAST	ENP2	Ribosome biogenesis protein ENP2	19	4.21073	4.30487	4.14674	4.79458	4.93237	5.00232	11.4886	11.5621	11.1311	12.7738	12.7653	12.8875
sp|Q12518|ENT1_YEAST	ENT1	Epsin-1	18	8.67945	9.28347	8.79446	6.23446	6.49618	6.6229	10.1648	10.5934	9.73667	7.60312	7.80373	7.98744
sp|Q05785|ENT2_YEAST	ENT2	Epsin-2	20	9.1078	9.89224	9.6241	6.28594	6.40251	6.37379	8.51358	8.46796	8.12701	9.00645	9.32175	8.87688
sp|P47160|ENT3_YEAST	ENT3	Epsin-3	28	7.90066	7.65958	7.8521	7.73268	7.78028	7.70776	9.38231	8.90711	9.70311	8.08107	8.57537	8.71796
sp|Q07872|ENT4_YEAST	ENT4	Epsin-4	7	9.34266	9.79102	10.194	7.76027	7.5445	8.53948	7.74519	7.18683	7.81876	8.11859	7.71824	8.24048
sp|Q03769|ENT5_YEAST	ENT5	Epsin-5	13	6.45377	6.9244	6.68522	6.67022	6.75171	7.14153	11.2816	10.8972	11.2156	8.72931	8.4044	8.84512
sp|Q99382|ENV10_YEAST	ENV10	SRP-independent targeting protein 2	7	6.10244	7.05039	7.52417	7.85205	8.4097	9.13241	7.98421	7.71264	7.86445	10.226	10.1415	10
sp|Q12003|ENV7_YEAST	ENV7	Serine/threonine-protein kinase ENV7	2	18.4721	16.5181	17.0432	10.2375	9.10674	10.2611	3.5996	3.02597	3.58428	2.64334	2.58405	2.92398
sp|Q08651|ENV9_YEAST	ENV9	Probable oxidoreductase ENV9	4	4.28411	4.15618	4.57556	9.42799	9.64208	8.66038	9.66575	8.87883	9.65265	9.97421	10.4266	10.6557
sp|P53938|EOS1_YEAST	EOS1	N-glycosylation protein EOS1	3	8.45072	7.98195	8.11331	7.86608	7.74972	7.29283	9.25879	10.1961	9.35007	8.25965	7.30684	8.1739
sp|P43572|EPL1_YEAST	EPL1	Enhancer of polycomb-like protein 1	4	4.00986	3.75113	4.1443	7.56783	7.35581	7.4515	10.2975	9.92472	9.74897	12.7987	11.8895	11.0601
sp|P40557|EPS1_YEAST	EPS1	ER-retained PMA1-suppressing protein 1	24	10.2211	10.4435	10.2783	8.64133	8.64079	8.69106	6.79049	7.11458	6.91224	7.58269	7.36671	7.31725
sp|P22140|EPT1_YEAST	EPT1	Choline/ethanolaminephosphotransferase 1	1	5.95852	6.82189	7.0514	8.17908	8.35878	7.96409	8.84214	7.32217	7.12168	9.96564	11.9848	10.4298
sp|Q04660|ERB1_YEAST	ERB1	Ribosome biogenesis protein ERB1	25	4.72558	4.98364	4.8184	4.70109	4.67609	4.64436	12.2755	12.0666	12.0389	11.6508	11.7346	11.6845
sp|P38767|ERC1_YEAST	ERC1	Ethionine resistance-conferring protein 1	1	1.27798	0.790452	1.38125	0.828946	0.51962	1.03967	19.4835	17.4778	19.8996	11.5329	12.0749	13.6934
sp|P18414|ERD2_YEAST	ERD2	ER lumen protein-retaining receptor	7	7.50597	8.32652	8.30087	7.93133	9.13655	9.03324	7.28584	7.52824	7.97438	9.51995	8.90023	8.55687
sp|P32476|ERG1_YEAST	ERG1	Squalene monooxygenase	15	5.20524	5.16124	5.46371	4.81241	4.66448	4.56076	15.8968	15.002	15.9599	7.76153	7.63186	7.88009
sp|P41338|THIL_YEAST	ERG10	Acetyl-CoA acetyltransferase	29	9.25392	9.55224	8.93552	4.93886	5.05767	5.26784	10.6448	10.8863	10.5739	8.35045	8.11175	8.42668
sp|P10614|CP51_YEAST	ERG11	Lanosterol 14-alpha demethylase	26	3.91399	3.56129	3.62051	3.05481	3.33159	3.09366	17.3529	16.5392	16.5919	9.45669	9.83853	9.64501
sp|P07277|KIME_YEAST	ERG12	Mevalonate kinase	10	11.0088	11.5316	11.634	6.17636	6.53455	6.22077	9.70262	9.2387	9.40885	6.09831	6.15245	6.29292
sp|P54839|HMCS_YEAST	ERG13	Hydroxymethylglutaryl-CoA synthase	28	8.48962	8.44158	8.33871	5.98388	6.22332	6.14306	11.6346	12.2184	11.0108	7.03269	7.06769	7.41562
sp|P32352|ERG2_YEAST	ERG2	C-8 sterol isomerase	4	9.68988	10.1713	9.93913	5.17593	5.72982	5.6693	12.8495	11.3732	10.648	6.72922	5.92311	6.10162
sp|P08524|FPPS_YEAST	ERG20	Farnesyl pyrophosphate synthase	36	10.2888	9.87599	10.0503	7.59852	7.49071	7.69447	9.6017	9.39073	9.75957	5.91183	6.09414	6.24324
sp|P53045|MSMO_YEAST	ERG25	Methylsterol monooxygenase	2	2.61969	2.75149	2.78855	2.32624	2.17535	2.66562	16.4635	17.254	15.6639	10.2243	11.9482	13.1192
sp|P53199|ERG26_YEAST	ERG26	Sterol-4-alpha-carboxylate 3-dehydrogenase, decarboxylating	16	8.64875	8.92914	8.73006	7.72622	8.12421	8.07792	9.78878	10.2443	9.46355	6.91167	6.89951	6.45592
sp|Q12452|ERG27_YEAST	ERG27	3-keto-steroid reductase	21	4.94218	5.0463	5.23135	3.77684	4.23417	4.16082	15.162	15.1709	15.1165	8.96551	8.99059	9.2028
sp|P40030|ERG28_YEAST	ERG28	Ergosterol biosynthetic protein 28	5	14.9896	16.6923	16.1458	7.45795	6.94232	6.97955	7.368	7.43672	8.46634	2.53822	2.36108	2.62206
sp|P40207|ERG29_YEAST	ERG29	Ergosterol biosynthesis protein 29	8	11.2115	12.2374	11.8037	5.6549	6.02224	6.06404	10.1485	10.231	9.91294	5.42933	5.43184	5.85269
sp|P32353|ERG3_YEAST	ERG3	Delta(7)-sterol 5(6)-desaturase	11	4.31762	4.5731	4.72621	1.54026	1.7775	1.804	15.4693	15.4553	14.7838	12.0422	11.7516	11.7592
sp|P25340|ERG4_YEAST	ERG4	Delta(24(24(1)))-sterol reductase	12	4.91542	5.50273	5.76251	6.12211	6.03791	6.09769	9.9184	9.49332	9.17852	12.8016	12.0581	12.1117
sp|P54781|ERG5_YEAST	ERG5	Cytochrome P450 61	16	6.85364	6.67664	6.89693	5.39626	5.37492	5.08964	14.5711	13.5387	13.5289	7.19063	7.27471	7.60789
sp|P25087|ERG6_YEAST	ERG6	Sterol 24-C-methyltransferase	31	6.13167	5.85724	6.03834	5.26035	5.19865	5.1291	11.6508	12.0796	11.443	10.4066	10.3103	10.4943
sp|P38604|ERG7_YEAST	ERG7	Lanosterol synthase	7	9.69478	9.89496	9.99225	6.27241	5.92347	6.26735	11.311	11.0485	11.1648	6.15429	5.76521	6.51104
sp|P24521|ERG8_YEAST	ERG8	Phosphomevalonate kinase	11	9.37631	9.21733	9.40121	6.21702	6.34733	6.13251	10.2826	9.88824	9.75242	7.54108	7.95595	7.88797
sp|P29704|FDFT_YEAST	ERG9	Squalene synthase	33	11.1184	11.2105	11.4479	7.63029	8.01412	7.87979	8.36345	8.33222	8.17688	6.00967	5.91395	5.90277
sp|P43613|ERJ5_YEAST	ERJ5	ER-localized J domain-containing protein 5	3	6.72803	6.01241	7.19113	9.19525	8.95958	7.82933	8.63594	7.53527	9.19317	9.1584	8.70893	10.8525
sp|Q03103|ERO1_YEAST	ERO1	Endoplasmic oxidoreductin-1	10	8.06398	8.54783	8.60614	6.83189	6.8735	6.96982	11.0822	11.1529	10.2167	7.20879	7.09542	7.35085
sp|Q05359|ERP1_YEAST	ERP1	Protein ERP1	13	6.28417	6.51984	6.52028	9.31968	9.61278	9.35443	9.23241	9.02557	9.30612	8.43384	8.12671	8.26417
sp|P39704|ERP2_YEAST	ERP2	Protein ERP2	3	4.65045	5.32978	4.4288	8.90619	9.71575	10.3281	9.5756	9.55085	10.239	10.1284	8.39932	8.74784
sp|Q12403|ERP3_YEAST	ERP3	Protein ERP3	3	8.35966	7.7091	7.96819	9.79817	10.2062	9.89544	7.70631	7.53068	8.0328	7.91433	7.55822	7.32095
sp|Q12450|ERP4_YEAST	ERP4	Protein ERP4	1	8.81129	10.5487	9.43002	11.258	12.9093	12.0746	6.78254	6.50442	6.97546	6.14893	4.06121	4.49559
sp|P38819|ERP5_YEAST	ERP5	Protein ERP5	3	7.15484	7.72676	6.88529	9.63692	10.9065	10.9355	8.00187	7.9917	7.8607	7.94287	7.8554	7.10158
sp|P53198|ERP6_YEAST	ERP6	Protein ERP6	7	7.13966	7.14135	6.89225	9.56709	9.85343	9.9981	8.43908	9.07166	9.47664	7.54637	7.40037	7.47401
sp|P17261|ERS1_YEAST	ERS1	Cystine transporter	1	6.71552	8.09005	9.79552	12.6207	11.989	10.6598	5.68631	4.60763	5.3864	6.7707	8.67969	8.99857
sp|P27882|ERV1_YEAST	ERV1	Mitochondrial FAD-linked sulfhydryl oxidase ERV1	5	10.3357	9.35367	10.0693	8.18178	8.33824	7.98773	8.79693	7.88502	8.52281	6.42133	6.93453	7.17293
sp|P53173|ERV14_YEAST	ERV14	ER-derived vesicles protein ERV14	4	6.9115	7.14712	7.78002	9.53051	9.62433	9.94495	7.8776	7.86851	7.36934	8.69072	8.53925	8.71616
sp|P38312|ERV15_YEAST	ERV15	ER-derived vesicles protein ERV15	1	0.397097	0.287287	0.457097	18.991	19.1299	19.8112	0.0005	0.0005	0.0005	14.7176	13.3679	12.841
sp|Q12284|ERV2_YEAST	ERV2	FAD-linked sulfhydryl oxidase ERV2	1	8.14764	9.59169	8.85497	6.14799	6.35666	6.60882	9.21662	8.88497	8.46112	10.0836	8.83323	8.81265
sp|P54837|TMEDA_YEAST	ERV25	Endoplasmic reticulum vesicle protein 25	8	6.48853	6.26215	6.62795	11.1807	11.0658	10.6187	8.72611	8.15643	8.51339	7.09379	7.34588	7.92053
sp|P53337|ERV29_YEAST	ERV29	ER-derived vesicles protein ERV29	9	7.99694	7.96232	8.2224	11.6001	12.0175	11.744	6.19107	6.17895	6.21781	7.29204	7.5044	7.07248
sp|Q04651|ERV41_YEAST	ERV41	ER-derived vesicles protein ERV41	8	6.52551	6.37246	6.42159	8.59222	8.18899	8.29767	8.96225	8.79987	8.55841	10.0831	9.73319	9.46468
sp|P39727|ERV46_YEAST	ERV46	ER-derived vesicles protein ERV46	3	5.34384	6.34375	6.6543	10.1799	8.5385	9.10591	8.68725	7.77872	9.04714	9.76705	9.35219	9.20147
sp|Q08649|ESA1_YEAST	ESA1	Histone acetyltransferase ESA1	5	5.27793	5.3271	5.35514	7.37401	8.92956	8.0828	11.0137	10.2373	9.10419	10.0605	10.211	9.02676
sp|P53918|ESBP6_YEAST	ESBP6	Uncharacterized transporter ESBP6	6	11.5782	12.3139	12.701	7.0483	7.36198	7.61373	9.54745	8.73763	9.01378	4.68005	4.80266	4.60138
sp|Q03661|ESC1_YEAST	ESC1	Silent chromatin protein ESC1	16	7.22562	7.26087	7.12996	7.66445	7.68231	7.65849	7.7869	7.6493	7.37536	10.7501	11.3188	10.4978
sp|Q06340|ESC2_YEAST	ESC2	Protein ESC2	6	9.75208	10.6837	9.62178	7.23196	7.01655	7.16853	8.32034	8.48201	8.03612	7.92349	7.86437	7.89903
sp|Q08119|ESC8_YEAST	ESC8	Protein ESC8	1	3.27375	2.70059	1.3355	2.6962	3.08322	3.23759	14.5273	11.4503	12.8501	19.7693	13.839	11.2371
sp|Q06344|ESF1_YEAST	ESF1	Pre-rRNA-processing protein ESF1	26	4.11817	4.20166	3.91751	4.36099	4.51016	4.56915	12.2885	12.6029	12.1844	12.7598	12.3372	12.1496
sp|P53743|ESF2_YEAST	ESF2	Pre-rRNA-processing protein ESF2	12	3.96028	3.87599	3.73142	4.07116	4.01419	4.04469	12.6983	12.7588	12.4856	13.0233	12.7659	12.5703
sp|P40456|ESL1_YEAST	ESL1	EST/SMG-like protein 1	3	8.53128	10.2062	7.42076	8.79035	8.835	9.17986	7.76605	7.91082	8.19076	7.74591	8.21215	7.2109
sp|P36168|ESL2_YEAST	ESL2	EST/SMG-like protein 2	6	12.6041	11.3178	12.5309	8.87806	8.78767	9.28728	7.22891	6.74896	6.50672	4.91622	5.42143	5.77183
sp|P22696|ESS1_YEAST	ESS1	Peptidyl-prolyl cis-trans isomerase ESS1	13	9.48967	8.86149	8.67885	9.62092	9.92883	9.75323	6.90687	6.62472	7.15683	7.59659	7.55228	7.82973
sp|P38748|ETP1_YEAST	ETP1	RING finger protein ETP1	4	12.4803	12.8747	12.4063	7.70197	7.97867	8.01015	6.1538	6.05087	6.18905	7.0644	6.81888	6.27092
sp|P38071|ETR1_YEAST	ETR1	Enoyl-[acyl-carrier-protein] reductase, mitochondrial	33	16.2926	15.9205	16.0398	10.5606	10.0595	10.2612	3.81905	3.67549	4.10806	3.11881	3.02668	3.11759
sp|Q08421|ETT1_YEAST	ETT1	Enhancer of translation termination 1	26	6.60591	6.61442	6.71609	6.0951	6.1077	5.97003	10.2774	10.3696	9.9508	10.3978	10.4608	10.4343
sp|Q04461|EUC1_YEAST	EUC1	Transcription factor-like protein EUC1	1	5.84209	7.31811	10.0843	6.14606	5.89485	8.67486	9.14359	8.48032	8.55642	10.027	9.37581	10.4566
sp|P32474|EUG1_YEAST	EUG1	Protein disulfide-isomerase EUG1	9	6.07435	6.27887	6.47865	12.9214	13.687	13.2484	6.14648	6.42374	6.16515	7.83595	7.41228	7.32772
sp|P23776|EXG1_YEAST	EXG1	Glucan 1,3-beta-glucosidase I/II	18	8.50441	8.22326	8.39648	8.87988	8.67372	8.49524	7.63728	7.25705	7.48315	8.55549	8.86038	9.03365
sp|P52911|EXG2_YEAST	EXG2	Glucan 1,3-beta-glucosidase 2	11	7.85379	7.92468	7.84345	5.82089	5.72999	5.81147	12.4987	12.2841	12.2034	7.41385	7.15883	7.45676
sp|P38289|EXO5_YEAST	EXO5	Exonuclease V, mitochondrial	2	8.79017	7.86045	8.35427	8.44446	7.26432	7.68396	8.74577	8.90766	10.1968	7.29546	8.36986	8.0868
sp|P19658|EXO70_YEAST	EXO70	Exocyst complex component EXO70	8	9.56936	9.53857	9.72664	7.65448	7.65698	7.63939	8.50382	8.21745	8.49509	7.56981	7.96036	7.46805
sp|P38261|EXO84_YEAST	EXO84	Exocyst complex component EXO84	11	8.91269	9.27582	8.96002	8.26276	8.19277	8.46487	8.25906	7.94983	7.90369	7.92806	7.9848	7.90561
sp|Q07541|EXP1_YEAST	EXP1	ER export of PMA1 protein 1	6	5.87169	5.93238	5.83778	6.69261	7.1721	7.41284	8.75922	8.95544	8.62715	11.6396	11.3654	11.7338
sp|P30624|LCF1_YEAST	FAA1	Long-chain-fatty-acid--CoA ligase 1	35	8.87718	8.39078	8.67811	12.9781	12.4067	12.4502	5.41169	5.26162	5.7512	6.40771	6.54127	6.84554
sp|P39518|LCF2_YEAST	FAA2	Long-chain-fatty-acid--CoA ligase 2	11	21.5564	19.4534	19.4815	7.11775	6.48166	6.83291	4.21049	4.05296	4.63225	2.11568	2.02706	2.03788
sp|P39002|LCF3_YEAST	FAA3	Long-chain-fatty-acid--CoA ligase 3	18	4.56085	4.91203	4.93915	9.34346	9.24668	9.20131	7.12256	6.93023	6.57818	12.5183	12.3707	12.2766
sp|P47912|LCF4_YEAST	FAA4	Long-chain-fatty-acid--CoA ligase 4	23	6.21794	6.29528	6.42443	7.39754	7.51931	7.53933	9.15563	9.20782	8.93537	10.618	10.497	10.1924
sp|P34756|FAB1_YEAST	FAB1	1-phosphatidylinositol 3-phosphate 5-kinase FAB1	7	6.66415	6.08987	6.68572	10.1597	10.0827	8.74394	6.99691	6.35633	8.03143	10.0061	10.0182	10.165
sp|P38913|FAD1_YEAST	FAD1	FAD synthase	14	10.4592	10.9915	10.5361	9.78541	10.1165	9.69487	7.16534	6.76777	6.73118	6.30386	5.80145	5.64692
sp|P40546|FAF1_YEAST	FAF1	Protein FAF1	6	5.20813	5.50286	5.11766	2.98917	3.55449	3.71439	12.833	13.1183	12.3122	11.3525	12.2257	12.0717
sp|Q12099|FAL1_YEAST	FAL1	ATP-dependent RNA helicase FAL1	9	3.80567	4.02482	3.88855	5.77048	6.19672	5.97047	12.0905	12.0221	11.5549	11.9993	11.4846	11.1918
sp|Q12055|KAD6_YEAST	FAP7	Adenylate kinase isoenzyme 6 homolog FAP7	15	3.13973	3.31952	3.27874	6.46957	5.9938	5.90067	10.7743	11.2541	10.9961	13.0753	12.5759	13.2223
sp|P21268|FAR1_YEAST	FAR1	Cyclin-dependent kinase inhibitor FAR1	5	1.94561	2.30624	2.0883	8.623	8.57269	8.43817	7.86549	7.95674	6.94298	14.7097	15.435	15.116
sp|Q06001|FAR10_YEAST	FAR10	Factor arrest protein 10	3	8.62422	8.80483	9.20292	9.20176	9.77684	9.24847	7.47388	7.88988	7.74216	7.96052	7.70088	6.37365
sp|P53917|FAR11_YEAST	FAR11	Factor arrest protein 11	11	9.4392	9.18608	9.47638	9.29883	9.26805	9.42502	7.98937	7.80113	7.16529	7.16093	6.9189	6.87081
sp|P46671|FAR3_YEAST	FAR3	Factor arrest protein 3	7	9.60164	8.95072	9.1474	8.36417	8.92524	8.73724	7.64339	8.33088	7.95248	7.14468	7.59778	7.60437
sp|P43592|FAR7_YEAST	FAR7	Factor arrest protein 7	5	8.57205	8.88607	8.62976	8.78806	9.46412	8.78934	8.26719	8.0597	7.56764	7.62917	7.86093	7.48597
sp|Q05040|FAR8_YEAST	FAR8	Factor arrest protein 8	17	8.55716	8.10867	8.42855	8.3769	8.35297	8.13273	8.07543	8.58762	7.83284	8.36985	8.51293	8.66433
sp|P07149|FAS1_YEAST	FAS1	Fatty acid synthase subunit beta	55	5.93447	5.66736	5.69576	6.69604	6.46955	6.38796	10.4626	10.1239	10.4393	10.6924	10.4564	10.9742
sp|P19097|FAS2_YEAST	FAS2	Fatty acid synthase subunit alpha	55	6.11712	5.96687	6.1283	7.09763	6.96726	6.85469	10.095	9.75856	10.326	10.254	10.1178	10.3168
sp|P38225|FAT1_YEAST	FAT1	Very long-chain fatty acid transport protein	17	8.60798	9.19378	9.46485	8.08575	8.73518	8.66535	7.5671	7.47114	7.13785	8.96538	8.14232	7.9633
sp|P40099|FTHC_YEAST	FAU1	5-formyltetrahydrofolate cyclo-ligase	3	3.99004	3.56356	4.19036	5.75714	6.79665	5.92994	12.3162	15.7977	9.02804	12.5407	11.4162	8.67353
sp|P14540|ALF_YEAST	FBA1	Fructose-bisphosphate aldolase	35	6.08254	6.1251	5.97661	8.5704	8.20426	7.68351	10.8692	8.86872	9.32598	8.99859	9.34452	9.95057
sp|P09201|F16P_YEAST	FBP1	Fructose-1,6-bisphosphatase	24	12.2452	12.1998	12.7955	21.0726	20.312	20.4586	0.0968443	0.046877	0.202035	0.278314	0.126035	0.166189
sp|P32604|F26_YEAST	FBP26	Fructose-2,6-bisphosphatase	25	15.2868	15.8056	15.5754	9.97936	9.97491	10.2643	4.42387	4.57466	4.44549	3.22894	3.22863	3.21207
sp|Q12035|FCF2_YEAST	FCF2	rRNA-processing protein FCF2	14	5.91901	5.76927	6.16448	4.0431	3.98255	4.01021	12.5621	12.5869	12.4192	10.9712	11.1015	10.4704
sp|Q03254|FCP1_YEAST	FCP1	RNA polymerase II subunit A C-terminal domain phosphatase	9	6.5225	6.59015	6.55449	7.19587	7.47692	7.55276	9.52865	9.88406	10.4335	9.20364	9.58825	9.46921
sp|Q12178|FCY1_YEAST	FCY1	Cytosine deaminase	6	3.62722	3.81454	3.88022	8.98811	8.66355	8.96781	9.86984	9.98118	9.82713	10.9347	10.9914	10.4543
sp|P17064|FCY2_YEAST	FCY2	Purine-cytosine permease FCY2	9	5.5945	6.68602	6.60501	2.01934	2.19447	2.43334	16.4383	17.3412	17.0012	7.87148	7.79962	8.01549
sp|P40039|FCY21_YEAST	FCY21	Purine-cytosine permease FCY21	2	3.47589	4.15046	3.1303	3.99575	3.43636	4.00813	14.9508	15.6583	14.8928	11.1281	10.0968	11.0763
sp|Q03034|FDC1_YEAST	FDC1	Ferulic acid decarboxylase 1	8	13.8944	13.3049	13.5298	8.78374	8.30329	8.76293	6.41916	6.52416	6.79251	4.396	4.58664	4.70254
sp|Q08911|FDH1_YEAST	FDH1	Formate dehydrogenase 1	31	26.1044	26.3227	23.3891	0.318959	0.436042	0.793555	6.87574	6.61402	7.16015	0.677761	0.664018	0.643622
sp|P40214|FDO1_YEAST	FDO1	Protein FDO1	2	1.14625	0.622104	0.960899	2.20003	2.46056	1.99928	13.4278	12.8517	12.4866	17.0866	17.4151	17.3431
sp|P25621|FEN2_YEAST	FEN2	Pantothenate transporter FEN2	1	5.80563	7.04312	6.6249	1.93108	2.71092	1.8253	17.6385	16.7301	16.1243	8.6327	7.1055	7.82801
sp|P38260|FES1_YEAST	FES1	Hsp70 nucleotide exchange factor FES1	18	6.31117	6.4223	6.0901	8.09145	7.81922	7.20599	11.164	11.2119	11.0231	8.23926	8.02254	8.39895
sp|P38993|FET3_YEAST	FET3	Iron transport multicopper oxidase FET3	12	3.37631	3.42262	3.39919	3.81302	3.87202	3.64737	9.4383	10.1934	9.4953	16.7177	16.592	16.0328
sp|P40988|FET4_YEAST	FET4	Low-affinity Fe(2+) transport protein	4	10.7678	11.3994	11.2512	0.388681	0.188068	0.487476	9.85149	11.5762	10.7782	11.1841	11.237	10.8902
sp|P43561|FET5_YEAST	FET5	Iron transport multicopper oxidase FET5	13	9.61427	9.7545	9.47397	7.97959	8.08165	8.01342	8.46642	8.56501	8.86365	6.88341	7.09881	7.2053
sp|P39521|FHL1_YEAST	FHL1	Pre-rRNA-processing protein FHL1	8	5.33063	5.66292	5.6187	7.95477	8.01728	7.85073	9.07879	9.02171	8.71736	10.98	10.9748	10.7923
sp|P42837|FIG4_YEAST	FIG4	Polyphosphoinositide phosphatase	1	7.31286	6.6591	5.6043	9.81967	7.86224	8.57135	9.25241	8.59116	8.05586	9.025	9.7025	9.54355
sp|P45976|FIP1_YEAST	FIP1	Pre-mRNA polyadenylation factor FIP1	7	3.81023	4.26522	4.2636	4.20259	4.77097	4.63439	12.8442	13.5332	12.4269	11.7792	12.2477	11.2217
sp|P40020|FIR1_YEAST	FIR1	Factor interacting with REF2	3	2.99845	3.12083	3.22534	3.40063	3.53677	3.30072	13.9144	14.0158	14.7655	12.4967	12.5962	12.6287
sp|P40515|FIS1_YEAST	FIS1	Mitochondrial fission 1 protein	8	11.9856	12.3786	12.42	11.2407	11.2033	11.3918	5.51737	5.83457	5.70605	4.21483	4.17845	3.92876
sp|Q08906|FIT2_YEAST	FIT2	Facilitator of iron transport 2	1	12.4723	14.2596	14.1098	9.42781	11.2214	11.7219	3.03772	3.89369	3.62621	5.54229	5.74868	4.93864
sp|P40466|FKH1_YEAST	FKH1	Fork head protein homolog 1	6	3.98584	3.86063	3.9472	5.01546	5.15564	5.18849	12.0696	12.5183	12.171	12.2481	12.159	11.6807
sp|P41813|FKH2_YEAST	FKH2	Fork head protein homolog 2	8	4.08935	3.90326	3.89412	5.87203	5.64684	5.64904	10.7608	10.1686	10.7772	12.6095	13.1306	13.4986
sp|P38631|FKS1_YEAST	FKS1	1,3-beta-glucan synthase component FKS1	29	1.835	1.99084	2.00531	3.3092	3.20225	3.08252	15.6042	15.266	14.5794	13.1085	12.8495	13.1673
sp|Q08967|FLC1_YEAST	FLC1	Flavin carrier protein 1	6	4.48054	4.58305	4.41713	2.88179	2.88276	2.98512	11.9404	11.1152	11.3665	14.6916	14.3192	14.3366
sp|P39719|FLC2_YEAST	FLC2	Flavin carrier protein 2	8	9.2496	8.28197	9.06525	4.99026	4.43349	4.60125	13.1797	11.1093	13.0965	6.73511	7.3219	7.93564
sp|P53121|FLC3_YEAST	FLC3	Putative flavin carrier protein 3	6	6.50891	6.00691	7.00588	5.13142	5.18471	5.73337	9.94061	8.06146	8.77419	12.3299	12.7452	12.5775
sp|P03870|FLP_YEAST	FLP1	Site-specific recombinase Flp	1	3.75326	4.33	5.86092	3.15049	5.09141	5.51442	13.3407	11.9397	11.4102	12.2623	11.3155	12.0311
sp|P38124|FLR1_YEAST	FLR1	Fluconazole resistance protein 1	3	5.96844	5.77758	6.34381	0.0140886	0.326001	1.2443	24.7695	25.2042	26.19	1.12556	0.632734	2.40384
sp|P40491|FMC1_YEAST	FMC1	ATP synthase assembly factor FMC1, mitochondrial	3	8.35734	8.13837	7.9761	11.2298	10.8865	10.339	8.46046	8.99232	9.69252	5.32383	5.2554	5.34834
sp|Q03778|RIFK_YEAST	FMN1	Riboflavin kinase	7	12.0005	12.3078	12.0392	7.117	7.38894	7.09044	9.05542	9.05487	8.68954	5.07443	5.17879	5.003
sp|P38866|FMO1_YEAST	FMO1	Thiol-specific monooxygenase	7	15.4296	15.5142	15.5268	8.76512	8.10655	8.63607	5.51215	5.68594	5.71081	3.61041	3.84847	3.65385
sp|P40098|FMP10_YEAST	FMP10	Uncharacterized mitochondrial membrane protein FMP10	13	14.3838	14.267	14.1478	9.83265	9.5127	9.98356	6.03847	5.54459	6.10115	3.21171	3.48063	3.49599
sp|Q12497|FMP16_YEAST	FMP16	Protein FMP16, mitochondrial	5	9.22843	7.88471	9.63876	22.7415	24.2172	20.0158	0.743315	0.614866	1.15953	1.07028	1.28568	1.39992
sp|P38231|FMP23_YEAST	FMP23	Protein FMP23, mitochondrial	4	6.90168	6.58034	7.11783	22.758	21.8542	21.8896	2.11574	2.03975	2.12845	2.48026	2.42149	1.71266
sp|Q08023|FMP25_YEAST	FMP25	Protein FMP25, mitochondrial	10	10.4985	10.4501	10.2713	7.75323	8.30195	8.18756	7.87441	7.7692	7.14463	7.42541	7.27188	7.05187
sp|Q06179|FMP27_YEAST	FMP27	Protein FMP27, mitochondrial	15	8.40898	8.49102	8.51711	7.04446	6.90473	7.06871	8.52273	8.58763	7.64741	9.59162	9.37078	9.84482
sp|Q02883|FMP30_YEAST	FMP30	N-acyl-phosphatidylethanolamine-hydrolyzing phospholipase D, mitochondrial	3	6.42385	7.22516	7.55254	9.54204	9.93242	9.18072	10.3223	9.6977	8.99979	7.14218	7.49106	6.49022
sp|P43557|FMP32_YEAST	FMP32	Protein FMP32, mitochondrial	1	8.22017	6.9399	6.30879	12.9364	15.8943	14.3145	5.115	4.8502	5.88317	6.14208	6.81465	6.58083
sp|P46998|FMP33_YEAST	FMP33	Mitochondrial membrane protein FMP33	3	21.8657	22.7732	22.7931	8.10616	8.6809	8.43387	1.67476	1.87234	2.09569	0.606596	0.650613	0.447168
sp|Q08968|SELO_YEAST	FMP40	Protein adenylyltransferase SelO, mitochondrial	16	15.6131	16.8435	16.3643	13.2365	12.8371	13.3712	1.87155	1.86419	2.0254	2.01027	2.01558	1.94741
sp|P53889|FMP41_YEAST	FMP41	Uncharacterized mitochondrial hydrolase FMP41	10	10.7358	10.4884	10.9194	11.2845	11.0254	11.2081	5.50087	5.045	5.83477	5.75702	6.0017	6.19897
sp|Q04991|FMP42_YEAST	FMP42	Protein FMP42	6	10.8459	10.9269	10.9002	5.05327	5.61381	5.3764	8.52665	8.22764	8.45926	9.03499	8.45681	8.57823
sp|Q07651|FMP45_YEAST	FMP45	SUR7 family protein FMP45	13	22.0129	22.7892	24.48	8.34793	7.55224	8.14323	1.39313	1.24003	1.49626	1.05469	0.681303	0.809104
sp|P36141|FMP46_YEAST	FMP46	Putative redox protein FMP46, mitochondrial	7	14.7175	14.9045	14.6733	11.9044	12.1981	11.9459	3.42624	3.46217	3.89865	3.09745	2.89226	2.87954
sp|P40008|FMP52_YEAST	FMP52	Protein FMP52, mitochondrial	16	11.7522	11.879	11.6911	9.8951	10.1443	10.0351	5.87008	5.98104	5.95307	5.69676	5.64897	5.45335
sp|P50264|FMS1_YEAST	FMS1	Polyamine oxidase FMS1	9	19.6358	19.5227	19.3926	6.64033	6.95878	7.53139	3.68743	3.94805	3.57261	3.1205	3.02467	2.96519
sp|P32785|FMT_YEAST	FMT1	Methionyl-tRNA formyltransferase, mitochondrial	5	9.83414	10.0926	9.84818	12.6851	12.1428	11.7496	6.00083	5.29962	5.45918	5.34099	5.88719	5.6598
sp|O13329|FOB1_YEAST	FOB1	DNA replication fork-blocking protein FOB1	3	5.44095	5.61464	5.43086	3.82965	4.74415	4.67678	12.1693	11.7954	11.2653	12.3015	11.6286	11.1029
sp|P53848|FOL1_YEAST	FOL1	Folic acid synthesis protein FOL1	10	12.553	13.1056	13.8255	5.31337	4.90404	5.08086	7.79786	7.67301	6.86367	7.50994	7.78861	7.58444
sp|P51601|GCH1_YEAST	FOL2	GTP cyclohydrolase 1	12	7.37118	7.387	7.21166	8.78167	8.47964	8.2817	9.39838	9.56252	10.2084	8.06284	7.49924	7.75575
sp|Q12676|FOLD_YEAST	FOL3	Dihydrofolate synthetase	8	9.38772	9.00847	9.58399	8.18634	7.97956	8.45029	8.2689	7.57186	7.91111	7.67584	8.01693	7.959
sp|Q02207|FOX2_YEAST	FOX2	Peroxisomal hydratase-dehydrogenase-epimerase	40	22.6325	23.1599	22.9183	5.23713	5.18242	5.89986	3.79633	3.69159	3.9016	1.21374	1.17664	1.19009
sp|P53739|FPK1_YEAST	FPK1	Flippase kinase 1	11	7.82233	8.0088	7.59851	11.0135	10.68	11.1887	6.6673	6.56038	6.81441	8.05851	8.01554	7.57201
sp|P20081|FKBP_YEAST	FPR1	FK506-binding protein 1	18	6.70671	6.64778	6.69048	10.6637	9.67556	9.97077	7.31792	7.48592	8.18617	8.11141	8.9099	9.63362
sp|P32472|FKBP2_YEAST	FPR2	Peptidyl-prolyl cis-trans isomerase FPR2	4	8.84912	8.00116	8.35664	8.54292	8.17941	8.58644	8.4832	7.9296	8.99104	7.20026	8.23935	8.64085
sp|P38911|FKBP3_YEAST	FPR3	FK506-binding nuclear protein	14	5.66367	5.37999	5.51072	7.50832	7.8181	7.76617	9.41121	8.80338	9.60283	10.4474	10.6726	11.4155
sp|Q06205|FKBP4_YEAST	FPR4	FK506-binding protein 4	16	5.43733	5.08187	5.49055	6.83619	6.87504	6.68179	9.95489	10.0381	10.36	10.8709	11.0267	11.3466
sp|P23900|FPS1_YEAST	FPS1	Glycerol uptake/efflux facilitator protein	1	8.32775	9.53143	6.56701	6.12734	5.12249	5.89497	8.48777	12.2887	9.14901	9.73863	9.81695	8.94796
sp|Q07825|FRA1_YEAST	FRA1	Putative Xaa-Pro aminopeptidase FRA1	19	15.4173	12.6152	12.6324	7.90577	8.93302	7.75496	5.74901	5.94896	5.62796	5.85466	5.9648	5.59601
sp|P32614|FRDS_YEAST	FRD1	Fumarate reductase 1	26	7.78587	7.79009	7.79375	10.3012	10.4764	10.7025	6.86197	6.93372	6.86713	8.26163	8.14157	8.08417
sp|P32791|FRE1_YEAST	FRE1	Ferric/cupric reductase transmembrane component 1	17	1.06995	1.08726	1.1264	0.665417	0.762724	0.629462	13.6801	16.3868	15.269	16.5605	16.3153	16.4471
sp|Q12473|FRE6_YEAST	FRE6	Ferric reductase transmembrane component 6	3	13.0271	13.273	13.6462	3.13533	4.35577	4.70832	6.76065	7.82086	7.24394	9.26403	8.58903	8.17574
sp|Q12333|FRE7_YEAST	FRE7	Ferric/cupric reductase transmembrane component 7	4	4.61435	4.62122	4.80588	2.60569	2.90297	3.06695	14.7387	19.4494	19.0534	8.00693	7.81174	8.32279
sp|Q12209|FRE8_YEAST	FRE8	Probable ferric reductase transmembrane component 8	1	15.4471	15.8374	13.6987	5.908	6.32418	5.51818	6.91211	6.09376	5.71534	6.63764	5.83683	6.07079
sp|Q03002|FRK1_YEAST	FRK1	Fatty acyl-CoA synthetase and RNA processing-associated kinase 1	4	1.83934	2.27234	2.15686	2.80524	2.65304	1.81905	14.718	14.096	15.7087	13.319	14.7371	13.8754
sp|P37261|FRM2_YEAST	FRM2	Fatty acid repression mutant protein 2	6	24.3062	26.2132	24.7454	0.236621	0.293075	0.703925	6.22163	7.38	6.30198	1.15275	1.16323	1.28202
sp|Q06389|NCS1_YEAST	FRQ1	Calcium-binding protein NCS-1	3	7.71878	8.02868	7.13026	7.55332	6.83664	6.79582	10.1438	9.46573	8.33375	9.23339	9.43294	9.32689
sp|P15624|SYFB_YEAST	FRS1	Phenylalanine--tRNA ligase beta subunit	28	5.30891	4.89468	5.13753	8.41102	7.62649	7.50601	9.59775	9.11069	10.0848	9.97633	10.6507	11.6951
sp|P15625|SYFA_YEAST	FRS2	Phenylalanine--tRNA ligase alpha subunit	28	5.61581	5.36115	5.38023	7.16486	7.36583	6.96695	10.3367	10.9359	10.4186	10.4636	10.0462	9.94422
sp|Q99332|HPH1_YEAST	FRT1	Protein HPH1	1	9.62941	8.75163	8.43052	4.14669	4.2175	4.33996	10.5868	9.74963	10.0674	10.2792	9.56424	10.237
sp|Q12029|FSF1_YEAST	FSF1	Sideroflexin FSF1	19	9.13049	9.83323	9.82802	6.25759	6.23286	6.22527	9.43524	9.25771	9.60061	8.19657	7.74163	8.26079
sp|P38777|FSH1_YEAST	FSH1	Family of serine hydrolases 1	19	3.43753	3.22069	3.44267	6.37949	6.46237	6.16221	13.037	12.8112	13.4194	10.5138	10.3789	10.7348
sp|Q05015|FSH2_YEAST	FSH2	Family of serine hydrolases 2	4	5.36294	4.78189	5.63421	9.58073	9.0387	8.98407	8.86716	9.21003	8.47985	9.04675	10.2542	10.7595
sp|Q99369|FSH3_YEAST	FSH3	Family of serine hydrolases 3	13	7.7612	8.08097	7.75766	9.20333	9.74927	9.19052	7.97839	8.03666	7.5799	7.91373	8.24125	8.5071
sp|P38310|FTH1_YEAST	FTH1	Iron transporter FTH1	9	11.939	13.3148	13.8593	6.45397	7.01467	7.7111	7.20802	6.83789	6.79803	6.30007	6.33391	6.22926
sp|P40088|FTR1_YEAST	FTR1	Plasma membrane iron permease	8	4.44517	4.89246	4.93027	4.77798	4.78358	4.56265	9.96024	9.34723	9.33032	14.0076	14.4142	14.5483
sp|P25659|FUB1_YEAST	FUB1	Silencing boundary-establishment protein FUB1	8	8.1259	7.57728	7.91937	14.1862	14.1335	13.7794	4.25026	4.23372	4.73865	6.87707	6.83687	7.34177
sp|P38196|FUI1_YEAST	FUI1	Uridine permease	5	1.26625	1.4706	1.45756	1.76652	1.84421	1.65923	17.521	18.1078	17.0179	13.0448	12.0938	12.7504
sp|P08417|FUMH_YEAST	FUM1	Fumarate hydratase, mitochondrial	47	12.8838	12.7946	12.5838	13.0273	12.9953	12.9853	4.02062	4.07891	4.18147	3.54193	3.4747	3.43223
sp|P39730|IF2P_YEAST	FUN12	Eukaryotic translation initiation factor 5B	42	4.80626	4.57141	4.63166	8.34128	8.25141	8.17213	9.02938	8.91774	9.4061	11.3712	11.366	11.1355
sp|P28003|FUN19_YEAST	FUN19	SWIRM domain-containing protein FUN19	3	12.3068	12.3638	11.4602	14.1045	12.6274	13.706	3.14031	3.94089	3.888	4.53891	3.6994	4.22378
sp|P31381|FUN26_YEAST	FUN26	Nucleoside transporter FUN26	5	7.39422	7.56898	7.52388	4.99893	5.28902	5.11386	9.98848	9.72939	9.89742	10.6669	11.0893	10.7396
sp|P31380|FUN30_YEAST	FUN30	ATP-dependent helicase FUN30	22	3.21592	3.23285	3.28053	7.22019	7.40715	6.93088	10.7117	10.5686	10.434	12.3418	12.4251	12.2312
sp|P18562|UPP_YEAST	FUR1	Uracil phosphoribosyltransferase	29	4.57656	4.69169	4.51917	4.19453	4.55031	4.39159	14.7067	14.8998	14.2616	9.82031	9.61815	9.7696
sp|P05316|FUR4_YEAST	FUR4	Uracil permease	1	1.54143	2.799	3.14767	3.88218	3.85657	4.08165	13.9712	17.2362	14.8932	11.8947	11.6587	11.0375
sp|P16892|FUS3_YEAST	FUS3	Mitogen-activated protein kinase FUS3	10	8.36064	8.19922	8.55554	8.14739	8.47241	8.37095	9.48675	9.19935	9.65216	7.57647	7.09206	6.88706
sp|P40492|FYV10_YEAST	FYV10	Protein FYV10	7	14.3138	12.775	13.8031	12.2351	10.4732	11.6996	4.55596	4.14661	4.75049	3.2736	3.64466	4.32889
sp|P38783|FYV4_YEAST	FYV4	Protein FYV4, mitochondrial	1	9.62145	9.70966	10.3849	8.48724	7.38777	8.36513	7.7336	8.67273	9.97879	6.14426	6.43986	7.07463
sp|P53913|FYV6_YEAST	FYV6	Protein FYV6	2	7.26153	8.90003	9.05397	7.1643	7.49564	6.76359	7.77185	7.10036	9.14302	9.28035	9.53007	10.5353
sp|Q12247|FYV7_YEAST	FYV7	rRNA-processing protein FYV7	3	2.92052	2.95115	2.82719	3.7859	4.01624	3.59758	14.8446	14.1118	14.0171	12.6705	12.1711	12.0864
sp|P46949|FYV8_YEAST	FYV8	Protein FYV8	13	7.46983	7.37796	7.34613	8.01959	8.46489	8.26489	7.54683	8.11719	7.85077	9.96942	10.0524	9.52011
sp|P38297|FZO1_YEAST	FZO1	Mitofusin FZO1	11	7.15255	7.45126	7.54561	6.44478	6.83501	6.42392	10.8187	10.3707	10.5491	8.69946	8.74518	8.96372
sp|P39012|GAA1_YEAST	GAA1	GPI transamidase component GAA1	10	7.51255	7.83873	7.86362	9.17599	9.98051	9.98797	8.07976	7.57611	7.46134	8.23938	8.11106	8.17297
sp|P41733|CDC91_YEAST	GAB1	GPI transamidase component GAB1	1	5.34028	7.89402	8.93178	9.08934	11.7962	12.7136	6.68571	5.46237	6.55785	7.76371	7.86174	9.9035
sp|P28006|GAC1_YEAST	GAC1	Serine/threonine-protein phosphatase 1 regulatory subunit GAC1	5	15.1729	14.1208	14.4311	16.9361	16.6182	16.5722	1.17558	1.03624	0.966883	1.00391	1.00035	0.965723
sp|Q04792|DCE_YEAST	GAD1	Glutamate decarboxylase	25	14.7143	14.9243	14.7772	15.7026	11.1902	16.0813	2.02368	1.75084	2.15183	2.28657	2.19442	2.20278
sp|P19659|MED15_YEAST	GAL11	Mediator of RNA polymerase II transcription subunit 15	11	6.92617	6.40861	6.98666	6.03375	6.3493	5.64085	10.5025	10.4162	10.6985	10.2704	10.2178	9.54935
sp|P13045|GAL3_YEAST	GAL3	Protein GAL3	3	9.84827	13.1964	13.0143	16.6493	15.9021	15.0598	3.08443	2.42976	2.30282	3.03866	2.41201	3.06204
sp|P04387|GAL80_YEAST	GAL80	Galactose/lactose metabolism regulatory protein GAL80	4	8.03388	8.69568	8.00963	8.02964	7.90493	7.61562	9.63546	9.95653	9.82262	6.81522	7.65135	7.82946
sp|Q04739|GAL83_YEAST	GAL83	SNF1 protein kinase subunit beta-3	13	5.88862	6.0675	6.08091	6.01238	6.3899	6.33797	10.1136	10.1734	9.79509	11.0688	11.2298	10.8421
sp|P19145|GAP1_YEAST	GAP1	General amino-acid permease GAP1	8	3.46596	3.50465	3.62409	19.8692	19.6368	20.6794	7.90121	7.68218	9.84171	1.28299	1.18318	1.32866
sp|P28007|GAR1_YEAST	GAR1	H/ACA ribonucleoprotein complex subunit GAR1	10	3.64353	3.1554	3.33647	3.69204	3.51478	3.16903	14.0454	13.3951	14.2999	11.9753	12.2511	13.522
sp|P22146|GAS1_YEAST	GAS1	1,3-beta-glucanosyltransferase GAS1	19	3.86627	4.04801	3.82177	6.62404	6.71902	6.75274	10.7669	10.7861	10.3616	12.1255	12.093	12.0351
sp|Q03655|GAS3_YEAST	GAS3	Probable 1,3-beta-glucanosyltransferase GAS3	21	7.22352	6.80716	7.17707	10.2988	10.365	10.1352	7.06648	6.71497	7.06818	8.9605	9.29469	8.88841
sp|Q08193|GAS5_YEAST	GAS5	1,3-beta-glucanosyltransferase GAS5	4	9.78013	9.67305	9.99967	9.64791	9.00582	9.43353	6.76851	7.17864	7.61436	5.85058	7.28677	7.76104
sp|P43574|GAT1_YEAST	GAT1	Transcriptional regulatory protein GAT1	8	4.66935	4.58411	4.73618	14.7187	14.8192	14.9348	9.77814	9.40425	10.3416	4.09757	3.92915	3.98687
sp|P25555|GBP2_YEAST	GBP2	Single-strand telomeric DNA-binding protein GBP2	22	4.78569	4.92308	4.85965	5.96197	5.7702	6.027	10.617	10.7303	10.5734	11.9852	11.937	11.8295
sp|P09032|EI2BG_YEAST	GCD1	Translation initiation factor eIF-2B subunit gamma	22	6.20769	5.79175	5.97482	6.84985	7.02269	6.91136	10.4842	10.2199	10.5522	9.07368	10.0563	10.8556
sp|P41814|TRM6_YEAST	GCD10	tRNA (adenine(58)-N(1))-methyltransferase non-catalytic subunit TRM6	14	5.39632	5.31468	5.26667	5.17049	5.57396	5.28833	11.6447	11.2773	11.9353	11.2191	11.1096	10.8036
sp|P32481|IF2G_YEAST	GCD11	Eukaryotic translation initiation factor 2 subunit gamma	36	5.05786	5.08093	5.10991	5.86101	6.15181	6.06505	11.0737	11.5837	10.6435	11.0482	11.2018	11.1225
sp|P46959|TRM61_YEAST	GCD14	tRNA (adenine(58)-N(1))-methyltransferase catalytic subunit TRM61	6	6.92323	6.17559	6.29257	6.24509	5.79022	5.76204	10.8204	11.4618	11.7011	9.21079	9.65176	9.96532
sp|P12754|EI2BD_YEAST	GCD2	Translation initiation factor eIF-2B subunit delta	11	6.48916	6.17964	6.13174	7.23592	7.09711	7.11492	9.74384	9.4886	9.91299	9.91734	9.92456	10.7642
sp|P32501|EI2BE_YEAST	GCD6	Translation initiation factor eIF-2B subunit epsilon	21	5.53093	5.66034	5.42162	5.57917	5.96758	5.76504	13.6304	13.5812	13.1397	8.39211	8.54073	8.7912
sp|P32502|EI2BB_YEAST	GCD7	Translation initiation factor eIF-2B subunit beta	20	5.29424	5.10613	5.05109	6.68236	6.57326	6.32843	10.5171	10.7944	10.2203	11.2383	11.1092	11.0851
sp|P32656|CHAC_YEAST	GCG1	Glutathione-specific gamma-glutamylcyclotransferase	5	3.57158	3.1868	3.46226	8.07526	6.55772	7.79917	10.4198	11.1058	12.5571	10.6992	10.7969	11.7685
sp|P33892|GCN1_YEAST	GCN1	eIF-2-alpha kinase activator GCN1	40	4.58325	4.76114	4.8365	7.88781	8.22212	8.10688	8.08357	7.81196	7.55775	12.8566	12.6272	12.6652
sp|P15442|GCN2_YEAST	GCN2	eIF-2-alpha kinase GCN2	16	9.15557	9.46644	9.41825	8.42185	9.06342	9.02949	6.86913	6.88434	6.87749	8.72517	8.05315	8.0357
sp|P43535|GCN20_YEAST	GCN20	Protein GCN20	31	4.16022	4.13263	4.20746	7.77365	7.57472	7.65057	8.19404	8.36982	7.94556	13.7313	13.2296	13.0305
sp|P14741|EI2BA_YEAST	GCN3	Translation initiation factor eIF-2B subunit alpha	5	6.77971	6.82018	6.79372	7.41784	7.52917	7.54785	9.55761	9.89684	9.43572	9.43566	9.51459	9.2711
sp|Q03330|GCN5_YEAST	GCN5	Histone acetyltransferase GCN5	11	6.91891	7.13747	7.33299	8.91973	8.9363	8.51005	8.13101	8.40304	8.34022	9.28448	9.00242	9.08337
sp|P07261|GCR1_YEAST	GCR1	Glycolytic genes transcriptional activator GCR1	4	9.82853	10.4582	9.81232	9.44702	8.68191	8.84214	7.04499	7.47934	7.05411	6.94951	7.5728	6.82918
sp|Q01722|GCR2_YEAST	GCR2	Glycolytic genes transcriptional activator GCR2	2	7.54986	7.09771	8.28317	8.00329	6.38812	7.2051	8.43403	8.99221	7.79878	9.23669	8.89426	12.1168
sp|P35197|GCS1_YEAST	GCS1	ADP-ribosylation factor GTPase-activating protein GCS1	20	4.5993	4.28128	4.36187	5.28431	5.05181	4.97563	11.3194	10.457	11.7891	11.9999	12.4759	13.4045
sp|P48015|GCST_YEAST	GCV1	Aminomethyltransferase, mitochondrial	26	16.5021	16.7182	16.5093	9.48549	9.3192	9.71561	3.20367	3.09647	3.35485	4.0372	4.13854	3.91936
sp|P49095|GCSP_YEAST	GCV2	Glycine dehydrogenase (decarboxylating), mitochondrial	24	15.8267	15.7913	15.6683	9.65135	9.3049	9.70529	3.27168	3.0624	3.17715	4.77475	4.96783	4.79832
sp|P39726|GCSH_YEAST	GCV3	Glycine cleavage system H protein, mitochondrial	13	11.0556	11.3077	11.2496	13.0898	12.5264	12.1493	3.44054	3.44073	3.93286	5.66026	6.03353	6.11367
sp|P14065|GCY1_YEAST	GCY1	Glycerol 2-dehydrogenase (NADP(+))	29	19.6286	18.9572	18.7939	8.13893	7.8432	8.0736	4.7277	4.85474	5.0899	1.31808	1.19804	1.37608
sp|P32621|GDA1_YEAST	GDA1	Guanosine-diphosphatase	14	2.55731	2.48778	2.52224	5.71006	6.09293	6.10442	11.9595	11.7293	11.4956	13.2401	12.9386	13.1621
sp|Q06625|GDE_YEAST	GDB1	Glycogen debranching enzyme	36	14.3478	14.3922	14.6432	15.3032	15.0168	15.2192	1.79788	1.60421	1.93536	1.93691	1.92727	1.87601
sp|Q02979|GDE1_YEAST	GDE1	Glycerophosphocholine phosphodiesterase GDE1	13	8.83076	8.67749	8.75832	6.33804	6.28888	6.57976	10.1117	9.99015	9.24625	8.52736	8.47311	8.1782
sp|P07262|DHE4_YEAST	GDH1	NADP-specific glutamate dehydrogenase 1	36	1.10266	0.973789	1.03379	5.36405	5.83128	5.29993	18.2096	18.373	17.6412	8.81597	8.53064	8.82409
sp|P33327|DHE2_YEAST	GDH2	NAD-specific glutamate dehydrogenase	41	14.8592	15.1168	15.1455	12.9212	13.1149	13.1002	2.93579	2.96057	3.21596	2.20652	2.18023	2.24301
sp|P39708|DHE5_YEAST	GDH3	NADP-specific glutamate dehydrogenase 2	26	15.4655	15.0927	14.4836	15.988	14.1545	17.1577	1.3966	1.22496	1.65901	1.18185	1.07622	1.11936
sp|P39958|GDI1_YEAST	GDI1	Rab GDP-dissociation inhibitor	29	8.94619	8.53099	8.81995	9.13567	9.00843	8.96037	7.06675	7.07815	7.20703	8.23033	8.38698	8.62915
sp|P41913|GDS1_YEAST	GDS1	Protein GDS1	9	3.50227	3.67498	3.36062	2.85888	3.13248	2.97996	13.1879	12.7448	12.347	14.4287	14.262	13.5203
sp|P38301|GDT1_YEAST	GDT1	GCR1-dependent translation factor 1	1	6.78342	4.90477	5.09137	5.66873	5.03972	6.17473	10.0881	9.79225	11.9339	12.8037	9.99955	11.7198
sp|P47102|GEA1_YEAST	GEA1	ARF guanine-nucleotide exchange factor 1	14	5.62678	6.02986	6.06133	7.43673	7.95848	7.80468	8.86515	8.43085	7.85624	11.3718	11.4708	11.0873
sp|P39993|GEA2_YEAST	GEA2	ARF guanine-nucleotide exchange factor 2	17	6.21672	6.6912	6.88913	7.0047	7.16626	7.28513	8.68288	8.94973	8.26406	11.0509	11.1447	10.6546
sp|P37020|GEF1_YEAST	GEF1	Anion/proton exchange transporter GEF1	10	8.8276	9.77051	9.76432	7.92205	8.99582	8.66365	7.37456	7.58734	6.34595	8.2109	8.68314	7.85415
sp|P39722|GEM1_YEAST	GEM1	Mitochondrial Rho GTPase 1	7	9.62463	9.9045	10.1265	9.28913	9.71238	9.56345	7.11387	7.18088	6.49909	7.24469	7.06032	6.68058
sp|Q08622|GEP3_YEAST	GEP3	Genetic interactor of prohibitins 3, mitochondrial	12	7.21118	7.54587	7.46375	7.31641	7.50809	7.54288	11.7446	11.4243	11.1547	6.89579	7.18328	7.00903
sp|P38812|GEP4_YEAST	GEP4	Phosphatidylglycerophosphatase GEP4, mitochondrial	1	9.26762	7.52986	8.88866	9.97076	9.98033	10.5986	7.31968	7.16268	7.43932	7.26272	7.41478	7.16501
sp|Q12393|GEP5_YEAST	GEP5	Genetic interactor of prohibitin 5, mitochondrial	1	5.74019	5.10363	4.91611	13.0202	11.8833	11.736	6.2485	6.56723	6.09426	8.41982	9.47838	10.7923
sp|P53171|GEP7_YEAST	GEP7	Genetic interactor of prohibitin 7, mitochondrial	2	8.24745	9.33059	9.07528	10.5301	10.4536	11.0887	8.04156	8.25475	8.02875	5.79504	5.50353	5.65065
sp|P53192|GET1_YEAST	GET1	Golgi to ER traffic protein 1	12	7.81347	8.72497	8.63464	8.01386	8.20908	9.06073	7.81777	7.89514	7.41821	9.10886	8.41527	8.88801
sp|P40056|GET2_YEAST	GET2	Golgi to ER traffic protein 2	5	5.69428	6.05478	5.83997	7.2004	7.17641	7.28623	9.88986	8.8463	10.2251	10.1929	10.3417	11.2521
sp|Q12154|GET3_YEAST	GET3	ATPase GET3	25	6.5843	6.28033	6.37102	8.19823	8.33861	8.29835	8.75496	8.6923	8.78275	9.90128	10.0325	9.76538
sp|Q12125|GET4_YEAST	GET4	Golgi to ER traffic protein 4	13	6.22991	6.35954	6.75889	11.471	10.7801	10.9858	6.20008	6.803	6.71859	8.98995	9.11974	9.5834
sp|P14742|GFA1_YEAST	GFA1	Glutamine--fructose-6-phosphate aminotransferase [isomerizing]	34	9.19492	9.59601	9.47786	8.49345	8.77184	8.8146	8.25593	8.33586	7.96277	7.09263	7.05395	6.95018
sp|Q04839|GFD1_YEAST	GFD1	mRNA transport factor GFD1	4	5.83127	5.49805	5.32909	4.30467	4.3836	4.81535	12.4965	13.0302	13.5168	10.3436	10.252	10.1989
sp|P25370|GFD2_YEAST	GFD2	Good for full DBP5 activity protein 2	2	6.6974	6.67285	7.77079	6.51996	5.8821	6.31259	10.3962	10.1804	11.5647	8.20627	9.24174	10.5549
sp|Q06336|GGA1_YEAST	GGA1	ADP-ribosylation factor-binding protein GGA1	17	11.9165	11.9931	12.3617	11.7374	11.7996	11.6409	4.82409	4.89824	4.7738	4.66117	4.72469	4.66877
sp|P38817|GGA2_YEAST	GGA2	ADP-ribosylation factor-binding protein GGA2	21	8.27328	8.54569	8.5006	7.5219	7.43775	7.58572	8.59497	8.41813	8.56349	8.71282	8.98459	8.86108
sp|P38988|GGC1_YEAST	GGC1	Mitochondrial GTP/GDP carrier protein 1	20	11.4968	11.6409	11.6368	5.86141	5.96689	6.15124	11.5882	11.6837	11.5558	3.95156	4.03981	4.42689
sp|Q06648|GIC2_YEAST	GIC2	GTPase-interacting component 2	3	1.83058	2.48702	1.76106	8.51573	7.36167	6.95214	8.86731	9.54135	8.66802	13.1467	16.0201	14.8484
sp|P25569|GID7_YEAST	GID7	Glucose-induced degradation protein 7	9	12.9397	13.4628	13.0186	9.45305	9.28859	10.0089	4.96248	5.03341	5.24656	5.59665	5.49105	5.49832
sp|P40208|GID8_YEAST	GID8	Glucose-induced degradation protein 8	12	13.1183	12.9721	13.2998	10.114	10.1997	10.4525	5.72921	5.61504	5.52982	4.22678	4.44941	4.29343
sp|P53900|PFD4_YEAST	GIM3	Prefoldin subunit 4	6	5.9652	5.96678	5.88704	11.4568	12.018	10.7763	7.50864	8.21935	7.11967	8.37505	7.93309	8.77407
sp|P40005|PFD2_YEAST	GIM4	Prefoldin subunit 2	9	4.12786	4.04236	4.20426	4.28169	4.58329	4.45022	11.935	12.9396	11.6393	12.8142	12.4533	12.5289
sp|Q04493|PFD5_YEAST	GIM5	Prefoldin subunit 5	9	6.25319	6.01743	6.13852	6.33068	6.6492	6.45172	10.7248	10.5319	10.3737	10.4945	9.80783	10.2265
sp|Q12263|GIN4_YEAST	GIN4	Serine/threonine-protein kinase GIN4	15	3.63214	3.58553	3.62005	3.01956	3.33806	3.18749	14.412	14.6993	14.4689	12.2635	11.7969	11.9765
sp|P40036|GIP2_YEAST	GIP2	GLC7-interacting protein 2	13	20.3561	20.8479	20.1906	8.5785	8.71604	9.07499	2.48735	2.35189	2.62841	1.63614	1.54752	1.58447
sp|Q03016|GIP3_YEAST	GIP3	GLC7-interacting protein 3	20	3.55218	3.67687	3.67973	4.63912	4.92915	4.70954	11.8045	11.8101	11.6434	13.1504	12.9561	13.4489
sp|P39732|GIP4_YEAST	GIP4	GLC7-interacting protein 4	7	9.96163	8.82046	9.52946	9.51403	8.17819	9.0495	8.57272	8.11768	7.25923	6.76361	6.67144	7.56204
sp|Q03768|GIR2_YEAST	GIR2	Protein GIR2	10	4.82133	4.77446	4.81534	9.63128	10.3765	8.84067	8.65326	9.28433	8.79732	10.0384	9.77595	10.1912
sp|Q03833|GIS1_YEAST	GIS1	Transcriptional activator/repressor GIS1	10	8.51435	9.18025	8.19991	9.88015	10.0782	10.3907	7.61097	7.4947	7.26865	6.89447	7.16691	7.32077
sp|P53849|GIS2_YEAST	GIS2	Zinc finger protein GIS2	1	0.733356	0.406883	0.606596	9.55719	10.2617	9.49247	12.0041	11.443	11.3881	11.105	11.8983	11.1034
sp|Q12418|GIS3_YEAST	GIS3	Protein GIS3	3	4.37143	3.9079	3.57871	3.81116	3.99626	2.84442	11.1632	10.0563	9.86575	15.2321	16.4089	14.7638
sp|Q04233|GIS4_YEAST	GIS4	Protein GIS4	4	6.75541	6.65624	6.56969	6.59934	7.04576	6.96533	10.1448	10.4565	9.28562	10.1251	9.85448	9.54167
sp|P32775|GLGB_YEAST	GLC3	1,4-alpha-glucan-branching enzyme	35	10.8379	10.177	10.6666	22.1584	16.841	18.3605	1.54012	1.26864	1.93724	2.1273	2.01772	2.06752
sp|P32598|PP12_YEAST	GLC7	Serine/threonine-protein phosphatase PP1-2	14	8.5952	8.82933	8.60611	10.3029	10.1789	9.75077	7.36806	7.36875	7.08011	7.36354	7.2388	7.31756
sp|P41818|GLC8_YEAST	GLC8	Protein GLC8	8	7.18069	8.05657	7.90714	10.6666	10.8563	11.16	5.49642	6.07667	7.88031	7.60642	8.47348	8.63945
sp|Q06104|GLD1_YEAST	GLD1	Golgi/endosome-localized DSC protein 1	2	8.14499	6.00219	8.57863	10.004	11.7272	9.58721	8.10025	6.65621	8.80959	7.61208	7.09155	7.68605
sp|Q12315|GLE1_YEAST	GLE1	Nucleoporin GLE1	3	8.79978	8.43272	8.73897	6.11984	6.05531	6.17871	9.77216	9.70151	8.71128	8.76906	9.84571	8.87496
sp|P40066|GLE2_YEAST	GLE2	Nucleoporin GLE2	9	7.56337	7.94225	7.87872	6.56008	6.49162	6.61607	10.0618	9.86815	9.74132	8.58144	9.15985	9.53533
sp|P36143|GLG1_YEAST	GLG1	Glycogenin-1	8	20.3477	22.1893	21.4485	6.57558	6.88828	7.1442	3.05991	3.07825	3.27892	1.89595	2.07934	2.01406
sp|P47011|GLG2_YEAST	GLG2	Glycogenin-2	6	13.1145	13.1625	13.3554	13.1386	12.9839	13.1247	3.31425	3.37865	3.18721	3.6686	3.67522	3.89657
sp|P17709|HXKG_YEAST	GLK1	Glucokinase-1	39	13.8365	13.3749	13.4925	16.1422	14.4976	14.571	2.3648	2.21226	2.83918	2.18501	2.19347	2.2906
sp|P32288|GLNA_YEAST	GLN1	Glutamine synthetase	19	4.6873	4.77391	4.80514	16.5998	16.78	16.647	5.57377	5.77677	5.6499	6.26456	6.11411	6.32777
sp|P18494|GLN3_YEAST	GLN3	Nitrogen regulatory protein GLN3	5	6.85171	6.99313	7.47768	7.12922	7.82033	7.6656	8.60376	9.12033	9.9107	9.47828	9.42629	9.52296
sp|P13188|SYQ_YEAST	GLN4	Glutamine--tRNA ligase	37	5.98681	5.99907	5.9286	7.44826	7.32626	7.68318	8.93515	9.21529	8.82024	11.208	10.7807	10.6684
sp|P50107|LGUL_YEAST	GLO1	Lactoylglutathione lyase	9	10.0201	9.58235	10.1956	15.8131	16.0635	15.8225	3.68614	3.20432	3.58593	3.96873	3.84339	4.21435
sp|Q05584|GLO2_YEAST	GLO2	Hydroxyacylglutathione hydrolase, cytoplasmic isozyme	6	2.5802	2.37	2.28631	17.1493	16.047	16.3065	5.79938	5.98749	6.51463	8.23334	7.93082	8.79505
sp|P38682|GLO3_YEAST	GLO3	ADP-ribosylation factor GTPase-activating protein GLO3	22	5.01668	5.45019	5.20712	7.99006	7.78342	7.82362	8.17861	8.22035	8.42997	12.0587	11.8821	11.9592
sp|Q12320|GLO4_YEAST	GLO4	Hydroxyacylglutathione hydrolase, mitochondrial	11	16.1992	16.3961	16.9775	9.85864	9.7416	10.7483	3.96749	3.94924	3.80389	2.86171	2.67248	2.8238
sp|Q12680|GLT1_YEAST	GLT1	Glutamate synthase [NADH]	44	3.34443	3.28358	3.34799	10.6985	10.7401	10.4267	10.0429	9.68614	9.75024	9.75421	9.5218	9.4035
sp|P37303|GLY1_YEAST	GLY1	Low specificity L-threonine aldolase	25	1.15287	1.21731	1.08951	1.40139	1.4675	1.33749	16.8478	17.0189	15.7596	14.1924	14.2208	14.2945
sp|P36125|GMH1_YEAST	GMH1	Protein GMH1	1	11.2887	11.3733	10.4979	6.84229	7.69897	7.87163	7.87093	7.10651	7.43494	7.72916	6.5902	7.6954
sp|P43577|GNA1_YEAST	GNA1	Glucosamine 6-phosphate N-acetyltransferase	5	6.44841	6.27018	6.49861	9.44688	9.59005	9.14489	9.08952	9.10412	7.98495	8.9028	9.0161	8.50348
sp|P38720|6PGD1_YEAST	GND1	6-phosphogluconate dehydrogenase, decarboxylating 1	46	7.05864	6.98844	6.83418	7.37242	7.44711	7.33155	11.1989	11.6243	11.0716	7.65864	7.66589	7.74831
sp|P53319|6PGD2_YEAST	GND2	6-phosphogluconate dehydrogenase, decarboxylating 2	14	14.8572	14.4904	14.4185	14.7305	15.5996	15.929	1.81169	1.65275	2.13385	1.58563	1.44736	1.34358
sp|P48813|GNP1_YEAST	GNP1	High-affinity glutamine permease	19	6.82439	6.8443	6.82441	1.79832	2.13078	2.22797	14.0078	13.5791	13.2188	10.7391	10.8035	11.0014
sp|Q12096|GNT1_YEAST	GNT1	Glucose N-acetyltransferase 1	12	9.6832	9.80523	9.20962	7.54512	7.55263	7.74894	7.75319	7.72841	7.64535	8.34533	8.69428	8.28871
sp|P53839|GOR1_YEAST	GOR1	Glyoxylate reductase 1	23	9.2312	8.53131	8.90774	15.2171	13.1481	12.0634	6.49718	6.91339	6.52201	4.55466	4.22929	4.18464
sp|P38736|GOSR1_YEAST	GOS1	Golgi SNAP receptor complex member 1	10	8.147	8.26247	8.48479	9.01166	9.358	9.11842	8.91706	8.57765	8.89688	7.0935	7.10715	7.02541
sp|Q03554|GOT1_YEAST	GOT1	Protein transport protein GOT1	1	4.67451	6.39743	7.1955	9.01414	7.24736	7.65715	7.89452	7.97951	8.44308	9.23017	10.5792	13.6874
sp|P08539|GPA1_YEAST	GPA1	Guanine nucleotide-binding protein alpha-1 subunit	14	10.1674	10.6603	10.6302	8.35868	8.49934	8.61614	7.65021	7.49891	7.40013	7.0139	6.75898	6.74587
sp|P10823|GPA2_YEAST	GPA2	Guanine nucleotide-binding protein alpha-2 subunit	25	17.8934	17.3071	17.3729	7.70977	7.61307	7.69832	4.88571	4.59205	5.04247	3.29704	3.17633	3.41182
sp|Q08886|GPB1_YEAST	GPB1	Guanine nucleotide-binding protein subunit beta 1	5	9.88917	7.67519	8.83718	8.91773	8.60962	8.1353	7.70836	6.72003	8.34005	8.38323	8.07921	8.70492
sp|P39717|GPB2_YEAST	GPB2	Guanine nucleotide-binding protein subunit beta 2	9	9.04086	8.84629	9.16992	9.41772	9.47535	9.68579	7.85591	8.00168	7.40181	7.04512	7.26456	6.79499
sp|P48236|GPC1_YEAST	GPC1	Glycerophosphocholine acyltransferase 1	4	15.2229	15.5765	15.4104	9.43543	9.79772	9.98785	4.40548	4.54189	5.00981	3.90929	3.30541	3.39723
sp|Q00055|GPD1_YEAST	GPD1	Glycerol-3-phosphate dehydrogenase [NAD(+)] 1	29	10.3643	10.1463	10.2973	16.7606	14.9958	15.2356	3.1158	2.92711	3.53298	4.17271	4.18478	4.26668
sp|P41911|GPD2_YEAST	GPD2	Glycerol-3-phosphate dehydrogenase [NAD(+)] 2, mitochondrial	17	9.79705	9.51281	9.73982	7.23496	6.65565	7.23397	8.64853	8.45832	8.90692	7.55871	7.86677	8.38651
sp|P53130|GPG1_YEAST	GPG1	Heterotrimeric G protein gamma subunit GPG1	2	9.76129	11.1702	10.9492	22.2163	20.4996	20.329	0.370415	0.831394	0.820204	0.752769	1.14177	1.15771
sp|P06738|PHSG_YEAST	GPH1	Glycogen phosphorylase	45	8.66748	8.45788	8.56486	20.0756	20.8568	20.0419	1.68675	1.58002	1.92083	2.75251	2.7464	2.64901
sp|P53306|GPI1_YEAST	GPI1	Phosphatidylinositol N-acetylglucosaminyltransferase subunit GPI1	2	7.25483	8.7553	9.1794	8.65723	9.49956	9.32423	8.02163	8.04468	6.66034	9.48536	7.11704	8.0004
sp|P30777|GPI10_YEAST	GPI10	GPI mannosyltransferase 3	5	7.43714	8.45033	8.57415	9.0896	9.30224	10.9868	7.08798	6.46239	7.44346	8.50089	8.45566	8.20932
sp|Q06636|GPI11_YEAST	GPI11	Glycosylphosphatidylinositol anchor biosynthesis protein 11	1	6.63861	7.6695	6.89479	10.1567	9.9446	9.5011	7.40731	7.2924	6.81922	9.55539	9.32939	8.79101
sp|P23797|GPI12_YEAST	GPI12	N-acetylglucosaminyl-phosphatidylinositol de-N-acetylase	3	7.31056	6.65518	7.39691	9.74597	8.30067	8.54743	8.79466	8.88624	10.4931	7.28431	7.46849	9.11646
sp|Q07830|GPI13_YEAST	GPI13	GPI ethanolamine phosphate transferase 3	5	7.16186	7.19478	7.39061	10.4011	8.95258	9.06495	8.82257	8.00128	9.06088	7.60216	8.20795	8.13927
sp|P47088|GPI14_YEAST	GPI14	GPI mannosyltransferase 1	2	9.38764	10.0614	10.127	10.0302	11.1268	10.1216	6.38284	6.78075	6.76101	6.06591	6.79379	6.36113
sp|P38875|GPI16_YEAST	GPI16	GPI transamidase component GPI16	7	7.34977	7.80131	7.4394	10.6338	11.0981	10.713	7.41745	7.40321	7.1351	7.81775	7.68959	7.50145
sp|Q04080|GPI17_YEAST	GPI17	GPI transamidase component GPI17	16	8.45693	8.71115	8.44727	9.09071	9.18323	9.37477	8.30902	8.31015	8.13063	7.12759	7.23642	7.62212
sp|P38211|GPI18_YEAST	GPI18	GPI mannosyltransferase 2	1	7.19415	7.39888	6.68388	6.90363	8.1153	7.99539	9.34886	10.3364	9.85476	8.42078	9.77717	7.97074
sp|P49018|GPI8_YEAST	GPI8	GPI-anchor transamidase	6	6.82027	7.23501	6.78605	8.0504	8.06781	8.28434	8.97749	9.29263	8.87428	9.29666	9.21921	9.09584
sp|P00950|PMG1_YEAST	GPM1	Phosphoglycerate mutase 1	47	7.89193	7.37956	7.53081	8.86276	7.81915	7.7144	8.36451	7.96112	9.11033	8.58444	8.94445	9.83655
sp|Q12008|PMG2_YEAST	GPM2	Phosphoglycerate mutase 2	10	14.7552	14.7073	15.2864	12.8954	13.264	13.8611	2.57775	2.60395	2.76435	2.36361	2.57174	2.34916
sp|Q08726|GPN2_YEAST	GPN2	GPN-loop GTPase 2	5	5.78382	6.47576	6.07481	7.8503	8.16209	9.06385	8.66126	9.01095	8.56592	10.4064	10.4829	9.46195
sp|Q06543|GPN3_YEAST	GPN3	GPN-loop GTPase 3	4	6.24883	6.7883	6.82888	5.26944	5.88007	5.8422	12.2252	12.2425	11.2468	9.74272	9.16824	8.51673
sp|P41277|GPP1_YEAST	GPP1	Glycerol-1-phosphate phosphohydrolase 1	27	3.0213	2.93901	2.74865	2.90658	2.85578	2.70193	14.6171	15.0972	13.4902	13.5737	12.5998	13.4488
sp|P40106|GPP2_YEAST	GPP2	Glycerol-1-phosphate phosphohydrolase 2	18	5.73966	5.47802	5.65745	9.40173	9.17034	8.85698	7.87792	7.97942	7.65609	10.9502	10.9515	10.2807
sp|Q12361|GPR1_YEAST	GPR1	G protein-coupled receptor GPR1	5	8.83323	9.42801	9.3569	8.22483	7.01732	8.46306	10.9267	8.01186	9.08759	6.75944	6.90364	6.98741
sp|P36148|GPT2_YEAST	GPT2	Glycerol-3-phosphate O-acyltransferase 2	15	11.519	11.196	11.6501	13.574	13.3393	12.652	4.1034	4.19327	4.13737	4.56722	4.51539	4.55299
sp|P36014|GPX1_YEAST	GPX1	Glutathione peroxidase-like peroxiredoxin 1	7	9.88409	9.68834	10.2172	19.5185	20.9465	20.5025	1.70583	1.59424	2.40678	1.23257	1.08498	1.21853
sp|P38143|GPX2_YEAST	GPX2	Glutathione peroxidase-like peroxiredoxin 2	4	6.41963	6.26797	6.46977	4.38765	4.14597	4.16159	4.19524	3.89605	3.79757	17.7044	19.2239	19.3303
sp|Q07845|GRC3_YEAST	GRC3	Polynucleotide 5'-hydroxyl-kinase GRC3	6	5.90738	6.44326	6.23754	6.20696	6.36472	7.08289	10.3644	10.0079	10.4294	10.2224	10.8284	9.90472
sp|Q08969|GRE1_YEAST	GRE1	Protein GRE1	18	22.7209	22.7252	22.6678	9.60977	9.82182	9.94328	0.401457	0.362972	0.33278	0.541935	0.375513	0.496648
sp|Q12068|GRE2_YEAST	GRE2	NADPH-dependent methylglyoxal reductase GRE2	35	14.6288	14.7804	14.7214	5.90486	5.97413	6.03166	7.26923	7.36567	7.24045	5.1789	5.46338	5.44105
sp|P38715|GRE3_YEAST	GRE3	NADPH-dependent aldose reductase GRE3	27	11.8295	11.7599	11.9269	13.9592	12.9608	13.0457	3.80564	3.73461	4.50727	4.0595	4.06523	4.34584
sp|Q04410|GRH1_YEAST	GRH1	GRASP65 homolog protein 1	8	7.31383	7.36222	7.40622	7.9651	8.24047	8.0127	8.65779	9.02389	7.87244	9.00578	9.48986	9.64972
sp|P24814|GRR1_YEAST	GRR1	SCF E3 ubiquitin ligase complex F-box protein GRR1	8	7.35891	8.16554	8.22117	6.89472	6.60512	6.99519	9.35767	9.48948	10.9328	8.74734	8.58667	8.64544
sp|Q06817|SYG2_YEAST	GRS2	Glycine--tRNA ligase 2	13	10.5337	10.9122	10.8161	12.2626	12.4188	12.4088	4.75374	4.62688	4.73149	6.00764	5.2462	5.28191
sp|P25373|GLRX1_YEAST	GRX1	Glutaredoxin-1	19	12.7461	11.8874	11.81	12.5262	11.8027	11.3578	4.53909	5.32457	3.80329	5.14778	4.60269	4.45238
sp|Q03835|GLRX3_YEAST	GRX3	Monothiol glutaredoxin-3	4	7.49729	5.67866	5.64044	7.72517	5.94605	6.50372	9.86184	8.69828	11.5447	7.65787	9.83143	13.4145
sp|P32642|GLRX4_YEAST	GRX4	Monothiol glutaredoxin-4	5	4.60737	4.64354	4.21209	10.1777	10.6027	9.65448	10.7151	11.1455	10.2612	7.89099	8.16332	7.92604
sp|Q02784|GLRX5_YEAST	GRX5	Monothiol glutaredoxin-5, mitochondrial	4	7.07286	5.24599	5.89961	12.1946	13.9934	10.5009	7.71612	8.63006	6.92059	7.06183	6.86677	7.89738
sp|Q12438|GLRX6_YEAST	GRX6	Monothiol glutaredoxin-6	3	8.11362	7.80616	8.26442	5.38942	5.35686	5.0614	12.3749	12.8111	12.4731	7.0422	7.79943	7.50748
sp|P38068|GLRX7_YEAST	GRX7	Monothiol glutaredoxin-7	7	1.02439	1.25045	1.16849	13.7588	14.6048	13.967	3.77022	3.74366	3.65999	14.1963	14.674	14.1819
sp|Q05926|GLRX8_YEAST	GRX8	Glutaredoxin-8	4	14.5367	15.2678	15.7673	6.31785	4.72497	5.59614	6.51098	6.36908	6.90679	6.15522	5.36375	6.48341
sp|P40989|FKS2_YEAST	GSC2	1,3-beta-glucan synthase component GSC2	10	18.3837	18.8335	18.6364	9.76638	8.53357	8.77738	4.61216	3.53098	3.52334	1.93795	1.73418	1.73058
sp|Q04697|GSF2_YEAST	GSF2	Glucose-signaling factor 2	38	9.10013	9.30502	9.0259	8.08867	8.51578	8.48406	7.5483	7.63015	7.34754	8.63656	8.19449	8.12339
sp|P32477|GSH1_YEAST	GSH1	Glutamate--cysteine ligase	18	10.931	11.63	11.2101	5.22094	5.43527	5.34637	9.02303	9.01819	8.19725	8.21428	7.91968	7.85395
sp|Q08220|GSHB_YEAST	GSH2	Glutathione synthetase	28	10.1592	10.1722	10.173	7.52573	7.92063	7.89719	7.59882	7.63973	7.48201	7.75351	8.0193	7.65867
sp|P42950|GSM1_YEAST	GSM1	Glucose starvation modulator protein 1	1	12.34	11.8082	16.3185	20.2004	19.7298	16.0484	1.96185	1.57719	0	0	0.0086421	0.00695733
sp|P23337|GYS1_YEAST	GSY1	Glycogen [starch] synthase isoform 1	23	7.6543	7.95015	8.14352	19.0135	19.4658	19.8356	1.54982	1.5443	1.74332	4.38448	4.42986	4.28526
sp|P27472|GYS2_YEAST	GSY2	Glycogen [starch] synthase isoform 2	33	10.9877	10.9268	11.1373	16.6323	17.0062	17.0223	2.28425	2.14637	2.46796	3.1586	3.1204	3.10991
sp|Q04924|GLU2B_YEAST	GTB1	Glucosidase 2 subunit beta	10	8.78827	8.92563	9.40269	8.63819	8.8558	8.62433	9.78547	9.54427	10.2845	5.46114	5.94531	5.74441
sp|P53260|GATF_YEAST	GTF1	Glutamyl-tRNA(Gln) amidotransferase subunit F, mitochondrial	3	10.9318	10.0607	9.66172	10.4063	9.86436	10.3243	7.58267	6.9084	7.52628	5.21524	6.27982	5.23846
sp|P48239|GTO1_YEAST	GTO1	Glutathione S-transferase omega-like 1	3	27.3569	30.0785	27.074	2.31352	2.88397	3.04048	2.02178	2.46458	2.03937	0.359637	0	0.367286
sp|Q00582|GTR1_YEAST	GTR1	GTP-binding protein GTR1	11	12.6619	12.8279	13.2025	7.84778	8.47397	8.76177	6.01009	6.47342	5.77655	5.89739	6.07168	5.995
sp|P53290|GTR2_YEAST	GTR2	GTP-binding protein GTR2	8	11.6712	11.8372	11.4016	7.53978	7.21686	7.55032	7.01871	6.83487	6.96394	7.24384	7.29898	7.42275
sp|P40956|GTS1_YEAST	GTS1	Protein GTS1	11	9.06387	9.19058	9.0963	8.05247	7.56485	7.33176	7.6574	7.92476	8.94666	7.71032	8.39891	9.06213
sp|P40582|GST1_YEAST	GTT1	Glutathione S-transferase 1	19	16.9571	16.0005	16.7772	11.371	11.5099	11.2611	2.75323	2.53407	2.77052	2.80847	2.67178	2.58514
sp|Q12390|GST2_YEAST	GTT2	Glutathione S-transferase 2	3	24.4689	24.9268	25.4291	1.41924	1.54238	1.68957	5.17132	5.38395	4.78952	1.86697	1.85469	1.4575
sp|P39996|GTT3_YEAST	GTT3	Glutathione transferase 3	6	7.02538	7.74516	7.33971	8.07605	9.44861	8.7736	8.07264	8.10653	8.25612	9.29159	9.02158	8.84304
sp|P38625|GUAA_YEAST	GUA1	GMP synthase [glutamine-hydrolyzing]	41	4.3409	4.30612	4.2159	5.53715	5.59926	5.38302	11.2937	11.4277	10.9541	12.4409	12.3031	12.1981
sp|Q07729|GUAD_YEAST	GUD1	Probable guanine deaminase	5	7.81473	7.97615	8.45547	16.2949	16.2152	15.154	4.71458	3.97488	4.12529	5.02161	5.34315	4.91003
sp|P46943|GUF1_YEAST	GUF1	Translation factor GUF1, mitochondrial	3	10.3718	10.2252	10.6096	9.06559	9.31265	8.83682	9.24905	9.76576	9.65514	3.48007	4.85104	4.57732
sp|P15454|KGUA_YEAST	GUK1	Guanylate kinase	18	4.18897	3.54318	3.81713	7.92304	6.41124	6.55256	9.68141	9.81302	10.8346	11.751	11.9149	13.5689
sp|P53154|GUP1_YEAST	GUP1	Glycerol uptake protein 1	5	8.64829	11.0021	9.68758	8.40611	9.1765	9.21685	7.22727	6.33649	7.04809	7.35505	7.67175	8.22393
sp|P46655|SYEC_YEAST	GUS1	Glutamate--tRNA ligase, cytoplasmic	40	5.73655	5.97483	5.86278	8.95423	9.52502	9.31465	8.80971	8.62782	8.52895	9.72763	9.58878	9.34905
sp|P32190|GLPK_YEAST	GUT1	Glycerol kinase	17	9.66981	9.35998	9.50716	18.4707	18.5212	18.4263	3.08503	3.07468	3.19414	2.27932	2.23642	2.17528
sp|P32191|GPDM_YEAST	GUT2	Glycerol-3-phosphate dehydrogenase, mitochondrial	34	17.4779	17.4959	17.9264	12.129	11.7141	11.8753	2.28835	2.15279	2.60326	1.50013	1.36903	1.46789
sp|P40531|GVP36_YEAST	GVP36	Protein GVP36	38	9.21412	8.93638	9.22244	9.55468	9.35695	9.35562	6.9173	6.97842	7.35638	7.60864	7.6654	7.83366
sp|P47026|GWT1_YEAST	GWT1	GPI-anchored wall transfer protein 1	3	5.98641	7.46231	8.30483	8.74353	9.47484	10.9237	8.55291	7.70952	7.92169	8.30141	8.6449	7.97399
sp|Q04322|GYL1_YEAST	GYL1	Probable GTPase-activating protein GYL1	21	8.96818	9.0754	9.38835	7.51836	7.50157	7.60733	9.13889	8.81253	8.90548	7.70855	7.81481	7.56055
sp|Q08484|GYP1_YEAST	GYP1	GTPase-activating protein GYP1	5	9.05316	9.23318	9.67078	8.83243	8.90684	8.9889	7.14603	7.40037	7.46969	8.09995	7.45203	7.74666
sp|Q12344|GYP5_YEAST	GYP5	GTPase-activating protein GYP5	14	6.65084	6.43485	6.46949	9.32287	9.55632	9.29921	7.69121	7.4242	7.78134	9.9133	9.75968	9.69669
sp|P32806|GYP6_YEAST	GYP6	GTPase-activating protein GYP6	4	7.47783	7.30058	7.64061	9.98209	10.3306	8.74794	6.61842	7.26432	6.34178	9.02606	9.82021	9.44959
sp|P48365|GYP7_YEAST	GYP7	GTPase-activating protein GYP7	11	8.79671	8.26118	8.5759	13.1828	13.7049	13.7002	4.62857	4.19245	4.79618	6.77715	6.94969	6.43429
sp|P43570|GYP8_YEAST	GYP8	GTPase-activating protein GYP8	2	8.01942	6.81665	6.43902	9.07098	10.5989	9.92071	6.519	7.4442	7.76332	9.53443	8.35505	9.51832
sp|P42944|GZF3_YEAST	GZF3	Protein GZF3	4	2.37941	2.54648	2.96121	7.75829	7.2272	7.59354	1.8563	1.68456	0.911055	22.4584	22.4236	20.1999
sp|Q12753|HAA1_YEAST	HAA1	Transcriptional activator HAA1	6	8.56896	7.73967	8.17828	8.52939	8.91643	8.98897	7.69131	7.91467	8.12055	8.29745	8.62374	8.43059
sp|P38970|HAL5_YEAST	HAL5	Serine/threonine-protein kinase HAL5	12	7.4692	7.23014	7.23637	5.76061	5.78022	5.63861	9.86067	9.69259	10.349	9.96867	10.1128	10.901
sp|Q12180|HAL9_YEAST	HAL9	Halotolerance protein 9	9	7.33642	8.33003	7.24341	7.01217	7.56706	7.21317	9.05591	8.89031	8.33108	9.8251	9.80177	9.39358
sp|P47119|ITPA_YEAST	HAM1	Inosine triphosphate pyrophosphatase	12	4.72622	4.70703	4.53931	7.90823	8.2202	8.18698	9.42456	9.61309	9.19508	11.3307	11.141	11.0076
sp|P0CE41|HAP1_YEAST	HAP1	Heme-responsive zinc finger transcription factor HAP1	4	5.63748	6.11128	5.80514	4.61829	4.09876	4.57825	7.43639	6.89803	6.76587	15.9111	15.9759	16.1636
sp|P06774|HAP2_YEAST	HAP2	Transcriptional activator HAP2	1	8.52813	4.70755	8.35953	10.7245	13.8534	7.57871	7.59579	6.45414	10.761	6.17514	9.63997	5.62216
sp|P13434|HAP3_YEAST	HAP3	Transcriptional activator HAP3	3	7.37044	6.38609	6.77207	10.7484	10.7367	9.03963	7.70944	7.85194	8.3667	7.88826	9.02998	8.10034
sp|P14064|HAP4_YEAST	HAP4	Transcriptional activator HAP4	1	6.55923	6.71482	6.07484	10.6772	10.143	7.70417	12.3477	10.3112	8.45201	5.70318	7.75282	7.55992
sp|Q02516|HAP5_YEAST	HAP5	Transcriptional activator HAP5	5	8.1148	8.509	9.69765	9.89688	10.4167	9.71892	7.73093	7.55557	8.28235	7.14815	6.62579	6.30323
sp|Q03532|HAS1_YEAST	HAS1	ATP-dependent RNA helicase HAS1	17	4.00711	4.02604	3.96361	4.12711	4.3547	3.95973	12.5103	12.7138	12.7087	11.9898	12.4	13.2391
sp|Q12341|HAT1_YEAST	HAT1	Histone acetyltransferase type B catalytic subunit	10	8.98508	9.0564	9.38151	7.40517	7.45887	6.9821	9.70433	8.89668	8.42433	8.2746	7.91894	7.51199
sp|P39984|HAT2_YEAST	HAT2	Histone acetyltransferase type B subunit 2	8	6.89492	7.47597	6.98217	8.55151	8.74553	7.93279	8.82701	8.74939	8.44419	9.08947	9.08425	9.22279
sp|Q96VH4|HBN1_YEAST	HBN1	Putative nitroreductase HBN1	10	19.9249	19.4006	19.9287	4.31844	4.55993	4.96309	6.57646	6.94492	6.78957	2.15779	2.27444	2.16125
sp|P32769|HBS1_YEAST	HBS1	Elongation factor 1 alpha-like protein	18	5.74024	5.76697	5.6436	7.76768	7.9052	7.95319	9.04024	8.83777	9.30104	10.6119	10.7732	10.659
sp|Q07653|HBT1_YEAST	HBT1	Protein HBT1	51	19.9283	20.4391	19.9348	12.2769	12.3768	13.0432	0.209766	0.133414	0.411881	0.488795	0.39478	0.362269
sp|P20448|DBP4_YEAST	HCA4	ATP-dependent RNA helicase HCA4	20	2.83628	2.9411	2.94522	3.66239	3.68758	3.46181	13.1174	12.992	13.258	13.7155	13.4124	13.9703
sp|P53834|HCH1_YEAST	HCH1	Hsp90 co-chaperone HCH1	18	5.34068	6.08439	5.60182	6.98947	6.7187	7.02656	11.3239	11.8341	11.4591	9.30247	9.24468	9.07422
sp|P25364|HCM1_YEAST	HCM1	Forkhead transcription factor HCM1	2	2.77729	2.61704	2.87205	6.30073	7.06192	6.1149	9.71551	9.29861	9.59389	14.2884	14.5982	14.7614
sp|Q05775|EIF3J_YEAST	HCR1	Eukaryotic translation initiation factor 3 subunit J	20	6.94263	6.11994	6.48549	6.39124	6.27011	5.81531	10.0679	9.85101	11.1914	9.48934	10.2362	11.1395
sp|P34243|HCS1_YEAST	HCS1	DNA polymerase alpha-associated DNA helicase A	20	7.07236	7.18769	7.50893	9.9485	9.91107	9.99484	8.21054	7.65565	8.16678	7.97067	8.22246	8.1505
sp|P53973|HDA1_YEAST	HDA1	Histone deacetylase HDA1	6	8.00607	8.16911	8.01272	6.90148	7.56387	7.23042	8.83162	8.41034	7.82398	9.59616	9.95048	9.50376
sp|Q06629|HDA2_YEAST	HDA2	HDA1 complex subunit 2	14	8.06337	7.34367	7.34898	7.19347	6.94212	7.31319	9.54401	9.16306	9.72813	8.9539	9.32246	9.08364
sp|Q06623|HDA3_YEAST	HDA3	HDA1 complex subunit 3	8	7.75553	8.28345	8.56629	8.16206	8.12877	8.53699	8.53796	8.55334	7.86508	8.47644	8.41204	8.72205
sp|P53978|EF3B_YEAST	HEF3	Elongation factor 3B	25	23.1749	23.8261	23.04	6.2714	6.35321	6.9493	2.34378	2.23198	2.43674	1.1978	1.07221	1.1026
sp|Q03281|HEH2_YEAST	HEH2	Inner nuclear membrane protein HEH2	18	8.98474	9.4926	9.50603	6.94096	7.53573	7.89395	8.61475	8.53574	8.32877	8.27797	8.0166	7.87217
sp|P38199|HEK2_YEAST	HEK2	Heterogeneous nuclear rnp K-like protein 2	11	6.48509	5.83796	6.08585	9.11542	8.37958	8.06508	6.71198	6.64148	7.55022	11.1271	11.3849	12.6153
sp|Q05580|HEL2_YEAST	HEL2	E3 ubiquitin-protein ligase HEL2	13	4.84046	4.79587	4.51403	6.25542	6.09382	5.99143	11.1821	11.1282	10.6367	11.5601	11.6649	11.337
sp|P09950|HEM1_YEAST	HEM1	5-aminolevulinate synthase, mitochondrial	17	2.48991	2.39055	2.33391	7.1479	7.16088	6.99898	16.1023	16.5554	16.3544	7.47008	7.51057	7.48517
sp|P32347|DCUP_YEAST	HEM12	Uroporphyrinogen decarboxylase	12	7.4337	7.61415	7.33789	12.1573	12.5888	12.3892	6.86521	7.0696	6.77441	6.23401	6.30091	7.23484
sp|P11353|HEM6_YEAST	HEM13	Oxygen-dependent coproporphyrinogen-III oxidase	14	4.40345	4.60556	4.58712	10.8831	11.6674	11.1442	6.68273	7.02498	6.51128	11.1317	10.7341	10.6244
sp|P40012|PPOX_YEAST	HEM14	Protoporphyrinogen oxidase	13	10.3537	10.6214	10.8112	12.3136	12.211	12.2639	4.82955	4.624	5.0021	5.46598	5.86922	5.63441
sp|P16622|HEMH_YEAST	HEM15	Ferrochelatase, mitochondrial	14	6.84476	6.73311	6.89617	14.3114	14.4816	14.2767	5.7144	5.81905	5.75505	6.59653	6.13283	6.43833
sp|P05373|HEM2_YEAST	HEM2	Delta-aminolevulinic acid dehydratase	17	7.44241	7.32301	7.36473	7.61663	8.03246	8.23292	10.187	10.2785	10.1023	7.84659	7.5842	7.98924
sp|Q07534|S2538_YEAST	HEM25	Mitochondrial glycine transporter	6	8.91945	9.25081	9.37815	9.86986	10.9282	10.3018	8.12114	7.78814	7.69263	5.75432	5.69927	6.29625
sp|P28789|HEM3_YEAST	HEM3	Porphobilinogen deaminase	7	6.0059	5.26265	5.54089	8.92858	7.97634	7.61019	10.5718	10.3786	11.1732	8.52235	8.76649	9.26292
sp|P06174|HEM4_YEAST	HEM4	Uroporphyrinogen-III synthase	9	5.76581	5.69767	5.82157	12.273	11.7647	12.0802	6.64939	6.726	6.73637	8.77056	8.90057	8.81424
sp|Q12276|HER1_YEAST	HER1	HMG2-induced ER-remodeling protein 1	20	14.0244	14.1542	14.1888	7.98723	7.91571	8.48534	6.26509	6.25549	6.49221	4.78296	4.92351	4.52503
sp|Q03557|GATA_YEAST	HER2	Glutamyl-tRNA(Gln) amidotransferase subunit A, mitochondrial	7	10.7293	10.5679	10.8952	10.5842	10.3499	11.0107	7.22958	6.8705	7.60837	5.03421	4.63648	4.48369
sp|P32874|HFA1_YEAST	HFA1	Acetyl-CoA carboxylase, mitochondrial	11	10.3353	10.3792	10.7293	7.61668	8.09476	8.03223	8.23735	8.50059	7.38331	6.86026	7.05283	6.77821
sp|Q04458|HFD1_YEAST	HFD1	Fatty aldehyde dehydrogenase HFD1	21	14.9079	14.1396	14.1873	12.1412	12.7595	11.9108	3.60676	3.50502	3.77381	3.12843	2.95145	2.9882
sp|Q12060|HFI1_YEAST	HFI1	Transcriptional coactivator HFI1/ADA1	3	7.24294	7.26743	7.18619	8.32835	8.71558	7.93011	8.78144	8.55264	8.20892	10.0696	9.04361	8.67322
sp|P48362|HGH1_YEAST	HGH1	Protein HGH1	20	6.46	6.34546	6.49433	4.91687	5.29863	4.92173	11.895	11.5819	11.3597	10.2316	10.1981	10.2968
sp|P02309|H4_YEAST	HHF1	Histone H4	24	7.09071	6.37439	6.32976	8.03307	7.7869	7.55676	8.87043	8.54118	9.13147	9.37748	9.62861	11.2792
sp|P53551|H1_YEAST	HHO1	Histone H1	10	6.8481	6.69695	6.71666	5.25373	5.51322	5.55315	8.89766	8.69301	8.82572	12.3776	12.6526	11.9716
sp|P61830|H3_YEAST	HHT1	Histone H3	6	6.03968	6.18197	5.83052	6.87988	7.1681	7.17179	9.5133	9.27928	9.60363	11.0807	10.5667	10.6844
sp|Q12373|HIF1_YEAST	HIF1	HAT1-interacting factor 1	2	9.06839	8.98913	8.80252	7.95668	7.40528	7.91948	8.19221	7.85689	8.04208	8.97701	8.2228	8.56752
sp|P06775|HIP1_YEAST	HIP1	Histidine permease	10	1.59808	1.57616	1.50231	1.75868	1.55807	1.45934	19.7371	19.6272	21.0337	9.44692	10.027	10.6755
sp|P32479|HIR1_YEAST	HIR1	Protein HIR1	7	6.88799	7.03452	6.8983	8.15621	7.77008	7.39238	9.32623	9.61458	9.57375	9.1364	9.3756	8.83396
sp|P32480|HIR2_YEAST	HIR2	Protein HIR2	9	5.99915	6.03009	6.04454	8.16379	8.91946	8.30108	9.15913	8.75355	8.38511	10.2469	10.4463	9.55095
sp|P47171|HIR3_YEAST	HIR3	Histone transcription regulator 3	8	5.90818	5.93955	6.15196	7.40112	7.35055	7.97862	9.69225	9.70571	9.02017	9.89203	10.582	10.3778
sp|P00498|HIS1_YEAST	HIS1	ATP phosphoribosyltransferase	14	6.81588	6.76302	6.87691	5.35022	5.42963	5.38308	10.098	10.6042	9.93134	10.7113	10.9791	11.0573
sp|P38635|HIS9_YEAST	HIS2	Histidinol-phosphatase	7	9.67178	9.58057	8.91452	9.09571	9.02171	8.99257	7.64578	7.60136	7.30706	7.34234	7.17499	7.65162
sp|P00815|HIS2_YEAST	HIS4	Histidine biosynthesis trifunctional protein	39	8.98884	9.18904	8.90678	11.5481	11.5351	11.4444	3.25976	3.24749	3.21578	9.77484	9.53978	9.35003
sp|P07172|HIS8_YEAST	HIS5	Histidinol-phosphate aminotransferase	13	11.9537	12.088	12.111	8.74692	8.82119	8.70477	6.0258	5.96007	5.88405	6.47395	6.80133	6.4293
sp|P40545|HIS4_YEAST	HIS6	1-(5-phosphoribosyl)-5-[(5-phosphoribosylamino)methylideneamino] imidazole-4-carboxamide isomerase	8	6.59333	6.1556	6.36273	8.10977	7.64321	7.36587	9.22441	9.03739	10.3727	8.87843	9.26893	10.9876
sp|P33734|HIS5_YEAST	HIS7	Imidazole glycerol phosphate synthase hisHF	37	7.93832	8.06793	7.89306	6.97798	6.95721	6.8714	9.74226	10.082	9.4883	8.66301	8.61042	8.70809
sp|P46973|HIT1_YEAST	HIT1	Protein HIT1	3	4.96567	5.02157	4.97899	7.23541	7.06831	7.26606	10.0611	9.53873	10.1171	10.8013	11.8849	11.0609
sp|P41809|HKR1_YEAST	HKR1	Signaling mucin HKR1	1	16.3286	15.736	14.9471	6.36568	4.99939	6.39006	5.19823	6.20652	7.55171	6.17072	4.62741	5.47854
sp|P48353|HLJ1_YEAST	HLJ1	Protein HLJ1	7	5.63195	8.10197	8.38339	4.34799	4.4888	4.91571	12.1459	11.1692	10.8483	10.6768	9.78397	9.50594
sp|Q04429|HLR1_YEAST	HLR1	Protein HLR1	2	4.68048	4.9928	5.01743	6.89825	6.63783	6.1804	9.48773	11.4876	10.8344	11.8571	10.4264	11.4997
sp|P40037|HMF1_YEAST	HMF1	Protein HMF1	12	10.0334	9.66774	9.97721	10.1229	9.25144	9.51665	7.39093	6.88368	7.15589	6.34548	6.75121	6.90346
sp|P12683|HMDH1_YEAST	HMG1	3-hydroxy-3-methylglutaryl-coenzyme A reductase 1	16	10.6824	11.2759	11.3047	3.71138	3.63991	3.94625	11.8407	12.2218	11.8722	6.61819	6.27166	6.61493
sp|P12684|HMDH2_YEAST	HMG2	3-hydroxy-3-methylglutaryl-coenzyme A reductase 2	8	7.30259	6.70622	7.50333	10.6979	11.1952	10.4192	6.65158	6.4421	6.38178	9.4402	8.93101	8.32891
sp|Q12039|HMI1_YEAST	HMI1	ATP-dependent DNA helicase HMI1, mitochondrial	3	9.38741	9.49287	10.082	6.91063	7.62438	6.96618	8.77142	8.76811	8.79368	8.11108	7.61956	7.47266
sp|Q03973|HMO1_YEAST	HMO1	High mobility group protein 1	17	5.85652	5.42612	5.70808	10.7538	10.5322	9.85101	8.37363	8.5551	8.69412	8.93817	8.72444	8.58676
sp|P38074|HMT1_YEAST	HMT1	Protein arginine N-methyltransferase 1	21	5.11656	5.0962	5.12702	5.39069	5.45314	5.34802	12.3224	12.8121	11.3246	10.4083	10.5913	11.0097
sp|P32339|HMX1_YEAST	HMX1	Heme-binding protein HMX1	5	20.9502	21.5091	21.2357	1.93325	2.2001	2.96568	7.75162	8.39008	7.27636	1.70219	2.00626	2.07953
sp|P19807|HNM1_YEAST	HNM1	Choline transport protein	3	4.01337	4.50149	4.03555	4.9932	5.32104	5.66935	17.5512	17.3219	17.103	6.43072	6.61992	6.43925
sp|Q04344|HNT1_YEAST	HNT1	Hit family protein 1	20	5.22631	4.82879	4.84811	11.4366	11.5863	11.3226	7.64304	7.78696	7.58428	9.27135	9.1424	9.32317
sp|P49775|HNT2_YEAST	HNT2	Bis(5'-adenosyl)-triphosphatase	12	10.475	10.5946	11.117	8.27417	8.0789	7.9689	7.67456	8.55769	6.6377	7.02904	6.90555	6.68698
sp|P47124|HOC1_YEAST	HOC1	Putative glycosyltransferase HOC1	9	7.57224	7.63585	7.68493	6.51691	6.44618	6.64477	10.7435	10.4784	10.5508	8.67909	8.71224	8.33511
sp|Q05080|CYK2_YEAST	HOF1	Cytokinesis protein 2	1	12.258	9.65746	11.0027	7.44749	8.75645	9.30584	6.3192	7.65996	7.04483	6.69714	6.57866	7.27218
sp|P32485|HOG1_YEAST	HOG1	Mitogen-activated protein kinase HOG1	17	6.63955	6.85721	6.66505	6.60479	6.65988	6.80506	10.6359	10.2773	10.3996	9.25268	9.58646	9.61648
sp|P13663|DHAS_YEAST	HOM2	Aspartate-semialdehyde dehydrogenase	36	7.26481	7.22166	7.3634	6.46312	6.36033	6.34858	11.2984	11.0352	11.2033	8.47699	8.4067	8.55742
sp|P10869|AK_YEAST	HOM3	Aspartokinase	23	12.43	12.3934	12.4358	3.95555	4.02039	4.10854	11.2165	11.3077	11.2081	5.60661	5.5448	5.77257
sp|P31116|DHOM_YEAST	HOM6	Homoserine dehydrogenase	39	9.37446	9.46366	9.28986	8.3426	8.41299	8.6918	6.80816	6.90842	6.78034	8.67583	8.75983	8.49205
sp|Q12214|HOS1_YEAST	HOS1	Histone deacetylase HOS1	2	9.12435	9.33137	9.7925	10.083	9.33152	9.94764	7.74073	7.63271	7.72992	6.97086	6.53614	5.77931
sp|P53096|HOS2_YEAST	HOS2	Probable histone deacetylase HOS2	3	4.5897	4.29378	4.45196	6.28833	6.81486	7.40368	11.4545	9.19025	8.84019	13.9304	11.4212	11.3212
sp|Q02959|HOS3_YEAST	HOS3	Histone deacetylase HOS3	12	7.75165	8.14442	8.01148	8.22977	8.63639	8.71017	7.8676	8.05366	8.30504	8.82139	8.79453	8.67392
sp|P40480|HOS4_YEAST	HOS4	Protein HOS4	16	6.7876	6.92488	7.08215	8.47254	8.88826	8.65194	8.61317	8.47085	8.52414	9.29704	9.17553	9.1119
sp|Q03213|HOT1_YEAST	HOT1	High-osmolarity-induced transcription protein 1	2	7.18545	7.90069	7.90642	5.52866	4.48225	5.07252	9.71428	9.18331	7.41414	11.1717	13.0301	11.4105
sp|P36078|HOT13_YEAST	HOT13	Helper of Tim protein 13	1	0	1.16335	1.3719	3.13522	3.48612	3.08103	14.0676	13.2079	14.2146	15.9574	14.0956	16.2192
sp|Q06592|HPA2_YEAST	HPA2	Histone acetyltransferase HPA2	5	20.4713	20.8255	21.7188	6.94037	7.03385	7.66313	3.96597	3.97995	3.85686	1.19044	1.21155	1.14238
sp|P39979|HPA3_YEAST	HPA3	D-amino-acid N-acetyltransferase HPA3	5	6.7849	6.91754	6.01329	12.8063	13.3614	13.6882	7.13826	7.7003	7.21557	6.20468	6.1463	6.02322
sp|Q01448|HPC2_YEAST	HPC2	Histone promoter control protein 2	10	5.13526	5.02266	4.90051	5.83422	6.29125	6.06759	10.4452	10.6351	11.0693	11.1381	11.6888	11.7719
sp|P40481|HPM1_YEAST	HPM1	Histidine protein methyltransferase 1	11	7.05793	6.85364	7.18078	6.75024	6.95808	6.51409	10.7077	10.9264	9.75819	8.85554	9.02407	9.41332
sp|P17629|HPR1_YEAST	HPR1	THO complex subunit HPR1	13	6.47366	6.81892	6.98575	6.49278	6.69322	7.01724	9.64116	9.52365	9.47793	10.5976	10.467	9.81099
sp|Q04178|HPRT_YEAST	HPT1	Hypoxanthine-guanine phosphoribosyltransferase	14	9.65692	8.93902	8.54733	5.38538	5.28626	5.13265	7.88229	7.77059	8.17608	11.2834	10.9043	11.0358
sp|P38922|HRB1_YEAST	HRB1	Protein HRB1	8	9.73587	9.76668	10.1076	6.6872	6.57807	7.53025	9.78713	10.1249	9.94249	6.48234	6.87073	6.38673
sp|Q08109|HRD1_YEAST	HRD1	ERAD-associated E3 ubiquitin-protein ligase HRD1	3	8.16228	8.00779	7.6165	8.33394	8.539	9.51122	8.20684	8.90059	7.94379	8.85765	7.74068	8.17972
sp|Q05787|HRD3_YEAST	HRD3	ERAD-associated E3 ubiquitin-protein ligase component HRD3	7	9.82845	9.29089	8.64717	8.43899	7.67501	7.65129	8.09433	8.33991	8.66127	7.19875	8.26145	7.91248
sp|Q05905|HRI1_YEAST	HRI1	Protein HRI1	24	5.95791	6.1458	6.07314	8.59519	8.42545	8.52502	7.49458	7.9221	7.25073	11.131	10.9887	11.4904
sp|Q08732|HRK1_YEAST	HRK1	Serine/threonine-protein kinase HRK1	18	6.82307	7.14609	7.2642	9.1142	9.1137	9.71356	9.34474	9.16389	9.59054	7.67636	7.49318	7.55648
sp|Q99383|HRP1_YEAST	HRP1	Nuclear polyadenylated RNA-binding protein 4	23	4.38926	4.27563	4.30066	5.30453	5.15089	5.13415	11.6079	11.4808	11.8071	12.051	12.0037	12.4945
sp|Q05549|HRQ1_YEAST	HRQ1	ATP-dependent helicase HRQ1	6	6.39865	6.72844	6.91958	6.96033	7.46943	6.77567	9.88234	10.1784	9.17551	9.60626	9.7999	10.1055
sp|P29295|HRR25_YEAST	HRR25	Casein kinase I homolog HRR25	10	5.86595	5.6632	5.58469	5.74444	6.06409	6.23265	11.6708	11.1218	11.3615	10.0254	10.3076	10.3579
sp|Q08273|RBX1_YEAST	HRT1	RING-box protein HRT1	1	7.41489	6.90169	9.12963	9.63732	8.75378	9.32437	6.43892	6.40877	4.59303	9.05173	11.0501	11.2958
sp|Q12347|HRT3_YEAST	HRT3	F-box protein HRT3	7	7.71824	8.0201	9.18122	10.8486	10.6356	12.2018	7.10788	7.28387	6.4845	6.9464	7.09705	6.47476
sp|P15108|HSC82_YEAST	HSC82	ATP-dependent molecular chaperone HSC82	6	5.16996	4.7769	4.83483	10.1348	10.1739	9.85418	8.30656	7.95303	8.32569	10.4021	10.3261	9.74195
sp|P38753|HSE1_YEAST	HSE1	Class E vacuolar protein-sorting machinery protein HSE1	9	6.00331	5.7008	5.80885	9.78627	10.4688	9.7374	7.82621	8.74946	7.53472	9.18045	9.4719	9.73177
sp|P10961|HSF_YEAST	HSF1	Heat shock factor protein	11	5.80713	6.04296	5.52453	8.31351	8.55613	8.67452	9.11901	9.61973	9.33016	9.90255	9.52496	9.58482
sp|P49955|SF3B1_YEAST	HSH155	U2 snRNP component HSH155	10	6.84442	7.08326	6.69318	7.93568	8.65443	7.82339	8.75331	8.90635	7.98929	9.9967	9.85993	9.46005
sp|P34244|HSL1_YEAST	HSL1	Probable serine/threonine-protein kinase HSL1	14	4.17851	4.6912	4.57007	3.59641	3.91538	3.47599	12.2809	12.8922	11.7416	12.6669	13.2471	12.7437
sp|P38274|HSL7_YEAST	HSL7	Protein arginine N-methyltransferase HSL7	5	5.88367	5.92586	5.84307	5.74882	5.17288	5.61332	11.2717	10.905	10.9633	10.6502	10.6175	11.4046
sp|P38348|HSM3_YEAST	HSM3	DNA mismatch repair protein HSM3	14	8.92778	9.27218	9.31596	9.10868	9.81698	9.12185	7.41832	7.00048	6.75884	7.68625	7.56729	8.00538
sp|P38910|CH10_YEAST	HSP10	10 kDa heat shock protein, mitochondrial	19	10.7336	10.7806	10.8794	8.04004	8.28713	8.23372	8.30145	8.33016	8.31289	5.92874	6.16643	6.00577
sp|P31539|HS104_YEAST	HSP104	Heat shock protein 104	52	9.53892	9.79761	9.74897	16.6845	17.1488	17.0887	3.01454	2.92255	3.07043	3.73052	3.78841	3.4661
sp|P22943|HSP12_YEAST	HSP12	12 kDa heat shock protein	31	12.7208	12.6071	12.1526	21.0577	13.0251	20.5794	1.25594	0.944695	1.70544	1.2195	1.31763	1.41408
sp|P32478|HS150_YEAST	HSP150	Cell wall mannoprotein HSP150	12	9.50519	9.26778	9.3999	14.8074	10.6909	15.2422	3.76558	4.58559	5.12773	6.12368	5.94603	5.53802
sp|P15992|HSP26_YEAST	HSP26	Heat shock protein 26	33	15.7784	15.414	14.461	14.7607	13.1001	15.313	2.66685	2.59205	2.91722	1.09225	0.940504	0.963928
sp|P25619|HSP30_YEAST	HSP30	30 kDa heat shock protein	15	13.8167	14.7044	14.8777	17.355	16.9396	16.8553	1.38087	1.37246	1.68353	0.389625	0.309529	0.315335
sp|Q04432|HSP31_YEAST	HSP31	Glutathione-independent glyoxalase HSP31	23	12.6209	12.8106	12.196	9.46542	8.72056	9.47653	7.6081	7.88929	8.33461	3.59568	3.41991	3.86241
sp|Q12329|HSP42_YEAST	HSP42	Heat shock protein 42	12	9.07608	8.2665	8.81841	20.5218	18.2813	18.1506	2.3876	2.3963	3.34577	2.91437	2.79772	3.04353
sp|P19882|HSP60_YEAST	HSP60	Heat shock protein 60, mitochondrial	39	8.06848	7.77132	7.95059	13.9368	13.0799	13.5614	6.18185	6.11672	6.32403	5.68003	5.72106	5.6078
sp|P33416|HSP78_YEAST	HSP78	Heat shock protein 78, mitochondrial	36	19.3021	20.4991	19.0455	7.50271	7.59229	8.14866	4.03105	4.06345	4.0295	1.98754	1.89816	1.89988
sp|P02829|HSP82_YEAST	HSP82	ATP-dependent molecular chaperone HSP82	12	8.38937	7.74562	8.4191	15.3117	15.2183	14.8348	4.89806	4.14022	4.81568	5.15258	5.46743	5.60716
sp|P53685|HST1_YEAST	HST1	NAD-dependent protein deacetylase HST1	9	5.20056	5.31888	5.55854	7.38918	7.98862	7.6739	9.89704	9.50468	9.20617	10.7412	10.3604	11.1608
sp|P53686|HST2_YEAST	HST2	NAD-dependent protein deacetylase HST2	4	6.55642	5.9048	6.55116	10.6965	9.87089	9.97192	7.9196	7.97237	8.54917	8.4736	8.80656	8.727
sp|P50079|HSV2_YEAST	HSV2	SVP1-like protein 2	6	12.3859	12.2844	12.5111	8.32477	8.23785	8.77477	5.77068	6.04395	5.95958	6.51417	6.67194	6.52094
sp|P02293|H2B1_YEAST	HTB1	Histone H2B.1	3	7.33587	7.33959	8.29124	7.16039	8.14108	8.47741	9.015	8.86015	9.00735	8.69977	9.02125	8.6509
sp|P02294|H2B2_YEAST	HTB2	Histone H2B.2	1	3.1291	2.99618	3.04672	5.02485	5.78293	5.72259	10.363	10.2251	10.017	14.318	15.3373	14.0373
sp|P38790|HTD2_YEAST	HTD2	Hydroxyacyl-thioester dehydratase type 2, mitochondrial	2	11.0273	10.2502	12.201	9.87434	8.62625	9.83624	7.56434	7.38207	7.34494	5.35729	5.10346	5.43268
sp|Q9URQ5|HTL1_YEAST	HTL1	High temperature lethal protein 1	2	5.25049	7.04226	6.79688	8.97174	6.42395	6.26811	9.33548	10.6613	7.65488	10.7065	10.428	10.4605
sp|Q12692|H2AZ_YEAST	HTZ1	Histone H2A.Z	4	6.31532	5.61297	5.07503	10.3379	9.53535	8.93605	8.06444	7.78105	9.34763	9.2598	8.88664	10.8479
sp|P40325|HUA1_YEAST	HUA1	Proline-rich protein HUA1	1	9.26685	10.0375	10.086	8.8628	9.61314	9.26659	6.18817	6.70585	6.05264	8.29198	7.68577	7.94271
sp|Q12134|HUA2_YEAST	HUA2	Protein HUA2	5	11.2947	11.1929	11.359	9.52543	9.81136	9.96161	5.91165	6.03425	6.51834	6.25196	5.98809	6.15074
sp|Q6Q546|HUB1_YEAST	HUB1	Ubiquitin-like modifier HUB1	4	8.55811	8.03481	8.46183	7.67046	6.91536	6.94003	9.00065	8.99779	9.38197	7.68123	9.24151	9.11624
sp|P53119|HUL5_YEAST	HUL5	Probable E3 ubiquitin-protein ligase HUL5	11	8.6068	8.00188	8.12072	8.73191	8.79006	8.38455	8.01259	8.26408	7.68204	8.11984	8.52277	8.76276
sp|Q12520|HUT1_YEAST	HUT1	UDP-galactose transporter homolog 1	1	8.67899	6.44698	7.21705	7.68676	7.81007	8.05363	8.21793	8.75897	10.1758	7.8331	7.71139	11.4093
sp|P04806|HXKA_YEAST	HXK1	Hexokinase-1	31	11.4296	10.896	11.2131	20.8314	14.0015	17.7907	2.02051	1.62778	2.19255	2.54771	2.65393	2.79513
sp|P04807|HXKB_YEAST	HXK2	Hexokinase-2	51	6.43588	6.13425	6.16993	9.24994	9.23523	9.0647	7.35465	7.52893	7.39548	10.5526	10.45	10.4284
sp|P32465|HXT1_YEAST	HXT1	Low-affinity glucose transporter HXT1	12	1.81496	1.63315	1.87236	0.778624	0.770305	0.677438	15.9888	15.3036	16.1723	15.1085	15.227	14.6529
sp|P23585|HXT2_YEAST	HXT2	High-affinity glucose transporter HXT2	7	2.1937	2.42615	2.5333	1.68584	1.75974	1.89666	14.4927	14.1199	13.6501	15.7036	15.003	14.5353
sp|P32466|HXT3_YEAST	HXT3	Low-affinity glucose transporter HXT3	18	1.83238	1.65287	1.78047	1.38208	1.29935	1.31254	16.3291	15.8647	12.8006	15.7463	14.5128	15.4868
sp|P32467|HXT4_YEAST	HXT4	Low-affinity glucose transporter HXT4	7	2.9686	3.15502	3.01112	14.2462	15.9424	15.5694	8.69583	8.88634	9.03984	6.25372	6.30389	5.92769
sp|P38695|HXT5_YEAST	HXT5	Probable glucose transporter HXT5	8	20.6058	22.5651	22.948	8.51397	8.6688	9.49173	1.44755	1.21148	1.44284	1.07569	1.05389	0.975106
sp|P39003|HXT6_YEAST	HXT6	High-affinity hexose transporter HXT6	2	7.0175	5.47293	5.89983	34.4902	20.9477	20.1892	0.29322	0.574039	1.35076	0.984014	1.33058	1.45
sp|P39004|HXT7_YEAST	HXT7	High-affinity hexose transporter HXT7	3	17.9754	18.1394	19.6228	10.421	9.30361	9.59956	2.98933	2.47688	2.62723	2.03646	2.38265	2.42569
sp|P32464|HYM1_YEAST	HYM1	Protein HYM1	9	5.42214	5.87577	6.1443	8.79036	9.75185	9.32334	8.88602	8.945	8.27144	9.43401	9.21517	9.94061
sp|P23301|IF5A1_YEAST	HYP2	Eukaryotic translation initiation factor 5A-1	19	6.83591	5.52956	4.85356	3.4895	3.44866	3.06464	14.9787	15.2913	18.9595	7.38851	7.40519	8.75488
sp|P40581|GPX3_YEAST	HYR1	Glutathione peroxidase-like peroxiredoxin HYR1	13	10.7805	11.1197	11.0029	11.3117	11.2093	11.3407	5.18485	5.41765	5.20523	5.81824	5.8829	5.72635
sp|P41734|IAH1_YEAST	IAH1	Isoamyl acetate-hydrolyzing esterase	6	9.90759	10.1231	9.44677	10.7447	9.95708	9.60153	5.62431	6.05263	5.64594	7.47657	7.66012	7.7596
sp|P47158|CAF17_YEAST	IBA57	Putative transferase CAF17, mitochondrial	13	14.5424	13.9266	14.0508	6.16752	6.11559	6.41183	8.59007	8.65486	9.16088	3.90013	4.14363	4.33571
sp|P40499|ICE2_YEAST	ICE2	Protein ICE2	1	10.2244	13.5166	11.0521	5.62198	8.45217	8.2267	8.1036	6.98173	7.24765	5.67475	7.81665	7.08164
sp|P28240|ACEA_YEAST	ICL1	Isocitrate lyase	34	12.6982	12.7898	12.8694	17.853	18.4019	18.6626	1.38888	1.18123	1.74442	0.86746	0.758146	0.785046
sp|Q12031|ACEB_YEAST	ICL2	Mitochondrial 2-methylisocitrate lyase	27	22.7335	23.3617	22.8786	5.40735	5.72638	6.15104	3.54289	3.65532	3.59958	0.96781	1.00205	0.973753
sp|P40051|ICP55_YEAST	ICP55	Intermediate cleaving peptidase 55	15	9.80758	8.96726	9.30711	9.14206	8.02409	8.44196	8.23565	7.77845	9.34268	6.26616	6.79989	7.88711
sp|P38284|ICS2_YEAST	ICS2	Increased copper sensitivity protein 2	2	15.7672	18.9018	17.2984	9.33636	9.70164	11.7126	2.70796	3.0852	2.57109	2.97606	2.75174	3.19005
sp|Q12385|ICT1_YEAST	ICT1	1-acylglycerol-3-phosphate O-acyltransferase ICT1	1	9.16144	8.50887	8.60614	5.88371	2.36456	1.99815	14.5821	11.9139	12.1955	7.60475	8.31573	8.86515
sp|P28834|IDH1_YEAST	IDH1	Isocitrate dehydrogenase [NAD] subunit 1, mitochondrial	41	14.2804	14.7211	14.5931	12.2525	11.8874	12.2808	3.78203	3.82031	4.07473	2.81258	2.76229	2.7328
sp|P28241|IDH2_YEAST	IDH2	Isocitrate dehydrogenase [NAD] subunit 2, mitochondrial	25	12.5794	12.3846	12.2901	14.7712	14.0196	13.8688	3.30507	3.07159	3.67355	3.23013	3.33376	3.47217
sp|P15496|IDI1_YEAST	IDI1	Isopentenyl-diphosphate Delta-isomerase	15	8.20556	8.26203	7.89061	7.83756	7.69985	7.89739	9.68887	10.1109	9.85551	7.44579	7.19498	7.91097
sp|P21954|IDHP_YEAST	IDP1	Isocitrate dehydrogenase [NADP], mitochondrial	23	10.7657	10.8256	10.4085	11.0573	11.0525	10.5126	6.13012	6.22521	6.45097	5.27739	5.45536	5.83868
sp|P41939|IDHC_YEAST	IDP2	Isocitrate dehydrogenase [NADP] cytoplasmic	29	15.3351	15.5144	15.6639	13.2361	14.1485	13.7166	2.79427	2.81686	2.96606	1.33764	1.21688	1.25362
sp|P53982|IDHH_YEAST	IDP3	Isocitrate dehydrogenase [NADP]	19	23.2469	23.5588	23.5413	4.74878	4.61235	5.29044	3.31041	3.23691	3.40464	1.69307	1.60382	1.75264
sp|P46958|IDS2_YEAST	IDS2	IME2-dependent-signaling protein	7	11.1593	11.4976	10.8403	8.96884	9.93377	9.37507	6.69626	6.2605	6.12478	6.25719	6.11113	6.77531
sp|P43579|IES1_YEAST	IES1	Ino eighty subunit 1	20	8.49014	8.80223	8.99985	7.77413	7.86921	7.75159	8.77475	8.97541	8.17129	8.07911	8.23159	8.08071
sp|P40154|IES2_YEAST	IES2	Ino eighty subunit 2	7	7.30884	7.39292	7.3835	6.484	6.91469	6.62323	9.33522	9.13035	9.75169	9.90243	10.0818	9.69133
sp|Q12345|IES3_YEAST	IES3	Ino eighty subunit 3	9	6.92885	7.1417	7.10784	6.24577	6.38671	6.58688	10.6878	10.2415	9.98711	9.72125	9.42134	9.54319
sp|Q08561|IES4_YEAST	IES4	Ino eighty subunit 4	5	7.70555	7.26057	7.8636	8.10956	7.98798	7.82028	8.43296	8.42077	8.25219	9.31983	9.75342	9.07329
sp|P40060|IES5_YEAST	IES5	Ino eighty subunit 5	1	9.02969	10.0367	9.5248	10.5311	10.6534	9.10481	7.11969	6.8022	6.06645	7.2666	6.51727	7.34728
sp|P32617|IES6_YEAST	IES6	Chromatin-remodeling complex subunit IES6	5	8.15595	8.22088	7.53347	7.57971	8.46741	7.75034	8.05308	8.44141	8.43142	9.50693	8.97677	8.88263
sp|P38286|MKAR_YEAST	IFA38	Very-long-chain 3-oxoacyl-CoA reductase	14	6.17953	6.16222	6.50206	9.71322	10.6064	10.1484	7.78216	7.75344	7.48857	9.50478	9.26144	8.8978
sp|P39520|IFH1_YEAST	IFH1	Protein IFH1	4	6.38568	5.90475	5.88867	8.37919	8.07419	8.17877	10.2032	10.1626	10.5304	8.69559	8.87738	8.71956
sp|P25038|IF2M_YEAST	IFM1	Translation initiation factor IF-2, mitochondrial	11	8.88604	8.86882	8.9368	9.80956	9.56417	9.78523	9.30504	9.26807	9.27304	5.40878	5.50826	5.38619
sp|P43598|IGD1_YEAST	IGD1	Inhibitor of glycogen debranching 1	5	16.275	15.2356	15.7014	15.8902	15.5099	13.6158	0.802244	1.34691	1.29819	1.4891	1.37217	1.4634
sp|P53897|IGO1_YEAST	IGO1	mRNA stability protein IGO1	8	11.9273	11.5206	11.9499	7.2741	7.41177	7.65305	7.00336	6.73657	7.31942	6.90874	6.75797	7.53727
sp|Q9P305|IGO2_YEAST	IGO2	mRNA stability protein IGO2	4	12.1062	12.0453	11.9033	7.83512	7.62291	8.0575	5.84785	5.94364	6.01824	7.52913	7.53399	7.55683
sp|P38874|ELP5_YEAST	IKI1	Elongator complex protein 5	4	9.77324	9.50855	9.54855	7.38923	7.38884	7.69096	8.46778	8.34546	8.12138	8.13265	7.73481	7.89855
sp|Q06706|ELP1_YEAST	IKI3	Elongator complex protein 1	21	4.94191	5.1655	4.92802	7.31891	7.78195	7.38627	9.33338	9.19778	8.83037	11.5321	12.1199	11.4639
sp|P47042|IKS1_YEAST	IKS1	Probable serine/threonine-protein kinase IKS1	2	8.77263	8.07849	7.86554	16.1961	15.7243	15.7132	4.63573	4.26072	5.25819	4.28259	4.45111	4.76144
sp|P47155|ILM1_YEAST	ILM1	Protein ILM1	4	6.17336	5.38804	5.88365	7.5456	7.33151	7.20408	10.3318	10.9947	10.011	9.74172	9.43661	9.95792
sp|P09436|SYIC_YEAST	ILS1	Isoleucine--tRNA ligase, cytoplasmic	40	4.36305	4.29652	4.35594	7.80801	7.90877	7.63129	9.18843	9.10667	8.95114	12.2841	12.1571	11.949
sp|P00927|THDH_YEAST	ILV1	Threonine dehydratase, mitochondrial	34	8.64945	8.52429	8.65176	7.32915	7.71468	7.43855	9.02881	8.88517	8.52932	8.44642	8.45445	8.34797
sp|P07342|ILVB_YEAST	ILV2	Acetolactate synthase catalytic subunit, mitochondrial	33	7.5549	7.25397	7.22888	7.24968	7.08152	7.07534	11.042	11.163	11.048	7.86128	7.73843	7.70303
sp|P39522|ILV3_YEAST	ILV3	Dihydroxy-acid dehydratase, mitochondrial	30	6.27645	6.37472	6.39581	8.8272	8.76912	8.76254	9.27855	8.98477	9.6073	8.91812	9.02947	8.77594
sp|P06168|ILV5_YEAST	ILV5	Ketol-acid reductoisomerase, mitochondrial	34	8.63126	8.35357	8.54284	6.64033	6.66951	6.59382	9.50008	9.64115	9.63669	8.50153	8.60275	8.68647
sp|P25605|ILV6_YEAST	ILV6	Acetolactate synthase small subunit, mitochondrial	13	8.4096	8.63023	8.48767	7.55365	7.34623	7.59024	9.85625	10.0426	9.69676	7.48447	7.35811	7.54421
sp|P53051|MALX3_YEAST	IMA1	Oligo-1,6-glucosidase IMA1	1	10.6943	6.82214	5.85702	7.02883	11.3522	13.0529	5.54277	10.1355	10.352	6.60255	6.36374	6.196
sp|P40884|IMA5_YEAST	IMA5	Oligo-1,6-glucosidase IMA5	1	19.5059	18.9637	19.6772	8.0884	7.97705	10.1529	5.41232	3.82488	4.43756	0	0	1.96013
sp|P38697|IMDH2_YEAST	IMD2	Inosine-5'-monophosphate dehydrogenase 2	8	4.9701	4.61067	4.70346	1.40114	1.58945	1.4257	23.0569	22.929	21.7535	4.2934	4.56537	4.70132
sp|P50095|IMDH3_YEAST	IMD3	Inosine-5'-monophosphate dehydrogenase 3	14	5.3269	5.19609	5.13078	4.844	4.69094	4.53343	12.4604	12.7594	11.899	11.2833	11.0756	10.8
sp|P50094|IMDH4_YEAST	IMD4	Inosine-5'-monophosphate dehydrogenase 4	16	4.72994	4.48616	4.54459	3.97645	4.20422	4.11738	14.1224	13.7146	14.1656	10.43	10.7379	10.7708
sp|P25626|IMG1_YEAST	IMG1	54S ribosomal protein IMG1, mitochondrial	3	10.3451	10.6856	9.85676	8.57005	8.27271	8.72314	8.95614	9.26769	9.42533	5.39492	5.40042	5.10217
sp|P25642|IMG2_YEAST	IMG2	54S ribosomal protein IMG2, mitochondrial	8	8.48363	8.6813	8.68374	6.5483	7.04665	6.8003	11.6036	11.7618	11.7834	6.25192	6.18001	6.17544
sp|Q06704|IMH1_YEAST	IMH1	Golgin IMH1	27	6.07502	5.89128	5.96514	6.62539	6.40993	6.22069	9.68143	9.88997	9.38484	11.3492	11.3568	11.1503
sp|P47170|IML1_YEAST	IML1	Vacuolar membrane-associated protein IML1	15	7.61756	7.37071	7.57329	8.83073	9.10541	9.14664	7.4364	7.03177	7.10945	9.47972	9.82654	9.47179
sp|P47031|IML2_YEAST	IML2	Inclusion body clearance protein IML2	21	10.5813	11.2112	10.8816	8.63625	8.83851	9.24559	7.9313	8.23636	7.97202	5.65782	5.40358	5.40447
sp|P38265|CENPL_YEAST	IML3	Inner kinetochore subunit IML3	2	7.48875	7.82343	9.38123	9.80556	9.45294	9.02167	7.59741	7.83193	8.86812	8.30589	7.40964	7.01343
sp|P53219|IMO32_YEAST	IMO32	Probable alcohol acetyltransferase	7	10.6856	11.0564	11.5979	11.0911	10.7658	11.2661	5.3311	5.16854	5.49118	5.96742	5.82287	5.75602
sp|P28627|IMP1_YEAST	IMP1	Mitochondrial inner membrane protease subunit 1	4	8.68119	7.79269	8.97403	13.7796	13.2495	12.5062	5.43941	6.11642	6.40997	5.68127	5.22936	6.14029
sp|P46972|IMP2_YEAST	IMP2	Mitochondrial inner membrane protease subunit 2	4	9.13817	9.08226	9.32893	14.3486	15.5364	14.4997	4.95408	3.72686	5.088	4.46357	4.49119	5.34219
sp|P32351|IMPX_YEAST	IMP2'	Sugar utilization regulatory protein IMP2	6	10.7045	9.64329	10.8314	10.7322	9.58477	9.96054	6.38623	6.02749	7.10081	5.82481	6.3663	6.83765
sp|P32899|IMP3_YEAST	IMP3	U3 small nucleolar ribonucleoprotein protein IMP3	12	5.42535	4.87202	4.94587	4.02373	4.75468	3.91794	12.6588	12.8613	12.1894	11.3813	11.6004	11.3692
sp|P53941|IMP4_YEAST	IMP4	U3 small nucleolar ribonucleoprotein protein IMP4	10	4.35487	4.25451	4.31764	4.25941	4.48598	4.14251	12.1213	11.9738	12.3113	12.4153	12.7401	12.6232
sp|Q02888|INA17_YEAST	INA17	Inner membrane assembly complex subunit 17	5	12.6416	13.2975	13.1143	8.15645	8.19732	8.51688	6.70255	6.36608	6.6449	5.54285	5.38011	5.43956
sp|P40576|INA22_YEAST	INA22	Inner membrane assembly complex subunit 22	6	11.7667	11.6073	12.4547	7.90599	8.69649	8.63017	7.44244	6.98971	7.77437	5.60285	5.89418	5.23508
sp|P01097|ATIF_YEAST	INH1	ATPase inhibitor, mitochondrial	10	13.1663	12.8696	13.7159	13.6265	13.5864	14.1471	3.74669	3.77907	4.19128	2.18931	2.50699	2.47487
sp|P38710|INM1_YEAST	INM1	Inositol monophosphatase 1	13	4.93186	5.01118	4.95347	6.09792	6.03467	5.8737	11.4598	11.9968	11.2269	10.8561	10.8244	10.7333
sp|Q05533|INM2_YEAST	INM2	Inositol monophosphatase 2	6	12.5399	13.2026	12.8431	10.9319	10.7452	10.5533	4.45042	4.85104	4.82137	4.86631	5.20041	4.99441
sp|P53901|INN1_YEAST	INN1	Ingression protein 1	3	6.54687	5.82512	5.76363	6.20962	6.43971	6.92451	10.8563	10.4894	11.2977	9.61747	9.65376	10.376
sp|P11986|INO1_YEAST	INO1	Inositol-3-phosphate synthase	13	4.54137	4.73724	4.63758	26.1663	26.9892	26.7102	1.52939	1.04526	1.64679	0.674944	0.68449	0.637178
sp|P26798|INO2_YEAST	INO2	Protein INO2	1	3.39407	3.80297	3.81288	4.54296	4.49316	5.79959	12.0865	12.4791	11.8332	13.673	12.818	11.2646
sp|P13902|INO4_YEAST	INO4	Protein INO4	1	4.04541	3.49745	3.06634	4.2454	4.7095	7.50537	13.4778	12.2931	10.3795	11.0083	12.2335	13.5384
sp|P53115|INO80_YEAST	INO80	Chromatin-remodeling ATPase INO80	22	8.79442	8.85085	9.11127	7.53135	8.02498	7.72459	8.31922	7.98139	7.99933	8.67751	8.54047	8.44463
sp|Q03694|INP1_YEAST	INP1	Inheritance of peroxisomes protein 1	5	8.91261	10.043	10.2022	9.98535	10.7977	11.4194	6.2241	6.89279	5.99375	6.78062	6.41068	6.33769
sp|P40559|INP51_YEAST	INP51	Phosphatidylinositol 4,5-bisphosphate 5-phosphatase INP51	7	7.03401	7.44184	7.66256	9.3898	9.67657	9.30985	7.86511	7.85436	7.60597	8.77312	9.10072	8.28609
sp|P50942|INP52_YEAST	INP52	Polyphosphatidylinositol phosphatase INP52	6	7.89293	7.54796	7.71126	7.97943	8.45287	8.2202	8.64388	8.51969	8.78943	8.48188	8.76009	9.0004
sp|Q12271|INP53_YEAST	INP53	Polyphosphatidylinositol phosphatase INP53	28	6.78282	6.6983	6.74193	6.75247	6.62477	6.49529	9.67715	9.42383	9.82582	10.1675	10.4259	10.3842
sp|Q08227|INP54_YEAST	INP54	Phosphatidylinositol 4,5-bisphosphate 5-phosphatase INP54	3	10.4297	10.1947	9.81649	8.09879	7.9572	7.52225	7.27458	7.35208	7.15071	8.06772	8.24064	7.89517
sp|Q12072|IOC2_YEAST	IOC2	ISWI one complex protein 2	10	6.72009	6.77168	6.56207	7.97764	8.62642	8.439	8.46055	8.51933	8.75803	9.85951	9.76648	9.5392
sp|P43596|IOC3_YEAST	IOC3	ISWI one complex protein 3	16	7.70915	7.60308	7.69007	8.11157	8.25562	7.85887	9.01541	8.94182	9.26827	8.66148	8.44165	8.44303
sp|Q04213|IOC4_YEAST	IOC4	ISWI one complex protein 4	7	7.13207	6.90472	6.19977	6.96722	7.99839	7.1756	9.81533	9.11038	9.3184	9.64091	9.965	9.77222
sp|P38803|IPI1_YEAST	IPI1	Pre-rRNA-processing protein IPI1	1	6.66501	5.96822	5.32897	4.32	2.9078	3.90699	13.0907	13.107	10.2189	11.9656	11.4536	11.0672
sp|P53877|IPI3_YEAST	IPI3	Pre-rRNA-processing protein IPI3	15	4.68648	4.98546	4.81526	4.59152	4.71199	4.60694	12.7326	12.919	12.7517	10.9433	10.6634	11.5924
sp|P00817|IPYR_YEAST	IPP1	Inorganic pyrophosphatase	27	5.95651	5.76102	5.82181	9.88054	9.71137	9.55686	7.45599	7.92001	7.58472	10.2904	9.88459	10.1762
sp|P38954|IPT1_YEAST	IPT1	Inositolphosphotransferase 1	5	0.876175	0.953196	0.967539	0.895054	1.1421	0.997371	18.3854	18.9929	17.1292	13.2169	13.2478	13.1963
sp|Q12280|IQG1_YEAST	IQG1	Ras GTPase-activating-like protein IQG1	6	11.2358	11.9282	11.4634	7.61692	7.9503	7.68461	6.89646	7.3664	6.51976	7.71525	6.77365	6.8492
sp|P18963|IRA1_YEAST	IRA1	Inhibitory regulator protein IRA1	15	9.72568	9.76188	9.40566	8.29672	8.9755	9.03437	6.79857	6.50389	6.97292	8.45839	8.17245	7.89397
sp|P19158|IRA2_YEAST	IRA2	Inhibitory regulator protein IRA2	12	9.9165	10.5758	10.2876	8.36244	8.56073	8.1229	7.21527	7.08854	6.6964	7.87853	7.80823	7.4871
sp|Q02733|IRC15_YEAST	IRC15	Increased recombination centers protein 15	5	16.4991	17.621	17.6599	10.3935	10.6617	10.7722	2.57299	2.44447	2.75454	2.97735	2.86198	2.7815
sp|Q07843|IRC19_YEAST	IRC19	Increased recombination centers protein 19	3	5.91771	7.00972	6.681	10.9267	10.987	11.0417	7.51585	8.1761	8.1798	8.19816	7.61694	7.74938
sp|Q06554|IRC20_YEAST	IRC20	Uncharacterized ATP-dependent helicase IRC20	2	4.96211	5.00827	5.379	5.69747	6.90391	5.95364	11.8749	11.692	11.7302	10.1915	10.9419	9.66506
sp|Q04772|IRC21_YEAST	IRC21	Increased recombination centers protein 21	4	12.8888	12.3812	12.7941	4.65122	4.09846	4.66199	12.4737	11.8887	12.837	3.54724	3.52873	4.24887
sp|P40006|IRC22_YEAST	IRC22	Increased recombination centers protein 22	4	5.16434	4.64613	5.13575	6.01081	5.91161	5.99655	10.7163	9.68408	10.1166	11.5404	12.6858	12.3917
sp|P40580|BZRD_YEAST	IRC24	Benzil reductase ((S)-benzoin forming) IRC24	21	9.66694	9.45335	9.71762	13.6305	13.9992	13.3065	4.44819	4.29727	4.30937	5.7233	5.76697	5.68068
sp|Q07951|POC3_YEAST	IRC25	Proteasome chaperone 3	1	7.234	6.46123	6.93595	6.54736	7.0688	6.6397	10.6544	11.2204	9.73198	8.99757	9.13241	9.37624
sp|Q06683|IRC3_YEAST	IRC3	Putative ATP-dependent helicase IRC3	2	7.85079	8.91942	8.4251	11.0092	10.4353	9.86517	7.86661	7.30561	7.97083	7.40378	6.91991	6.02822
sp|Q03036|IRC4_YEAST	IRC4	Uncharacterized protein IRC4	2	5.56586	5.17398	6.33333	5.41257	6.57191	5.48047	15.1084	12.8592	14.0932	7.93399	8.94814	6.51904
sp|P43610|IRC5_YEAST	IRC5	Uncharacterized ATP-dependent helicase IRC5	5	3.95132	4.11056	4.19411	6.20852	6.14392	5.73705	9.88375	10.25	9.99889	13.2796	12.8695	13.3728
sp|P43615|IRC6_YEAST	IRC6	Increased recombination centers protein 6	3	7.50101	7.58012	8.12018	9.96877	7.74179	7.01253	8.64238	8.3824	10.0883	8.21883	7.71173	9.03192
sp|P32361|IRE1_YEAST	IRE1	Serine/threonine-protein kinase/endoribonuclease IRE1	5	7.18082	6.90861	7.4105	8.03449	8.35625	8.19994	9.74811	9.95923	9.06938	8.61154	8.12347	8.39766
sp|P40541|SCC3_YEAST	IRR1	Cohesin subunit SCC3	10	6.77181	7.16195	6.97467	6.66755	7.0347	6.96247	9.62791	9.33723	9.10957	9.83765	10.5573	9.95717
sp|Q07821|ISA1_YEAST	ISA1	Iron-sulfur assembly protein 1	2	5.90857	6.0539	5.92407	8.61713	9.30311	10.0188	10.5998	10.873	11.1922	7.35015	7.16387	6.99552
sp|Q12425|ISA2_YEAST	ISA2	Iron-sulfur assembly protein 2	2	10.7756	10.4661	10.5442	10.068	9.31004	9.03928	6.32544	7.79218	8.10076	5.7896	5.79725	5.99155
sp|P40015|ISC1_YEAST	ISC1	Inositol phosphosphingolipids phospholipase C	4	6.99754	7.44603	7.27972	7.68405	7.82537	7.81249	8.95822	9.18897	8.95106	9.31088	9.24975	9.29593
sp|Q6Q560|ISD11_YEAST	ISD11	Protein ISD11	11	11.0217	11.5251	11.3265	8.56423	8.50781	8.72759	6.8121	7.29452	7.11986	6.31762	6.34933	6.43356
sp|P32488|ISF1_YEAST	ISF1	Increasing suppression factor 1	1	9.8527	5.5902	10.1526	12.6274	11.4582	13.3493	6.41986	5.69477	6.54122	6.14989	5.65325	6.51066
sp|P48526|SYIM_YEAST	ISM1	Isoleucine--tRNA ligase, mitochondrial	15	9.7239	9.65933	10.0224	8.46683	8.60191	8.63276	8.97367	8.9692	8.71585	5.97071	6.09476	6.16867
sp|Q99312|ISN1_YEAST	ISN1	IMP-specific 5'-nucleotidase 1	11	9.71795	9.35435	9.84775	9.84596	9.89794	9.87698	6.59219	6.40153	6.4775	7.50544	7.06968	7.41273
sp|Q06098|ISR1_YEAST	ISR1	Serine/threonine-protein kinase ISR1	2	12.3211	11.1934	12.1302	9.80599	10.5579	9.21748	4.71181	4.32917	4.18086	6.70786	7.12683	7.71737
sp|P53843|IST1_YEAST	IST1	Vacuolar protein sorting-associated protein IST1	10	10.7156	11.0647	10.9791	10.9781	10.6701	10.883	5.81275	5.8825	5.8386	5.92938	5.65103	5.5951
sp|P38250|IST2_YEAST	IST2	Increased sodium tolerance protein 2	25	10.467	11.1513	11.5463	7.45673	7.86633	8.51355	6.90655	6.78166	6.97774	7.4598	7.5024	7.37061
sp|Q03020|ISU1_YEAST	ISU1	Iron sulfur cluster assembly protein 1, mitochondrial	1	4.6778	4.89385	4.32714	6.77693	6.43501	7.29284	12.4727	14.0923	12.3678	9.10633	8.56865	8.98865
sp|P38144|ISW1_YEAST	ISW1	ISWI chromatin-remodeling complex ATPase ISW1	25	5.72529	5.68423	5.90173	7.08071	7.01001	7.01533	9.79394	9.41181	9.26074	11.0831	11.1504	10.8827
sp|Q08773|ISW2_YEAST	ISW2	ISWI chromatin-remodeling complex ATPase ISW2	15	5.99071	6.09149	6.07922	6.76273	7.00082	6.86469	10.0867	9.90716	9.80449	10.5785	10.7142	10.1192
sp|P21374|ISY1_YEAST	ISY1	Pre-mRNA-splicing factor ISY1	5	6.71147	7.18403	7.64713	7.50126	7.65801	7.29513	8.99404	9.5582	9.3992	9.13392	9.68498	9.23264
sp|P53125|ITC1_YEAST	ITC1	Imitation switch two complex protein 1	17	14.3909	15.0315	15.0097	6.63621	7.57065	7.18677	5.48134	5.50454	5.46461	6.06441	5.94684	5.71253
sp|P30605|ITR1_YEAST	ITR1	Myo-inositol transporter 1	7	2.42047	2.37663	2.42399	17.2876	17.4766	16.9363	9.863	9.73259	9.72	3.86645	3.94025	3.95616
sp|P30606|ITR2_YEAST	ITR2	Myo-inositol transporter 2	3	6.28515	6.94576	7.46235	8.70267	9.02338	10.5902	9.35681	9.18791	9.05566	8.29973	6.72229	8.36808
sp|Q04638|ITT1_YEAST	ITT1	Translation termination inhibitor protein ITT1	1	7.79484	9.86868	8.54101	10.1379	12.7919	11.1706	7.83903	7.73116	3.53804	8.65336	7.1363	4.79718
sp|Q04934|IVY1_YEAST	IVY1	Protein IVY1	13	12.0614	11.8193	11.7654	5.38168	5.43444	5.20555	9.81168	10.0232	10.2532	6.16803	5.81266	6.26351
sp|Q07532|IWR1_YEAST	IWR1	RNA polymerase II nuclear localization protein IWR1	8	9.7511	9.54394	9.6869	8.46957	8.7927	9.79147	7.61985	7.68282	7.83584	7.22082	6.92434	6.68066
sp|P33417|IXR1_YEAST	IXR1	Intrastrand cross-link recognition protein	5	6.32518	6.30267	6.61284	5.88381	6.24209	5.67309	11.3065	11.9087	10.6571	9.7009	9.72371	9.66335
sp|Q03419|IZH1_YEAST	IZH1	ADIPOR-like receptor IZH1	3	2.65869	2.37118	2.17331	1.32346	0.928388	1.10361	17.7343	18.5236	16.9255	12.3515	11.5175	12.389
sp|Q12442|IZH2_YEAST	IZH2	ADIPOR-like receptor IZH2	4	1.71002	1.50163	1.66284	3.00028	3.16395	3.05263	11.3469	12.4481	10.3542	16.9895	18.2923	16.4776
sp|Q99393|IZH4_YEAST	IZH4	ADIPOR-like receptor IZH4	1	1.80901	2.55426	2.53114	0.989656	0.933033	1.13207	15.3282	16.0338	14.7284	15.5075	14.2734	14.1796
sp|P53193|JAC1_YEAST	JAC1	J-type co-chaperone JAC1, mitochondrial	2	11.5307	10.4844	10.7263	11.3043	10.9726	10.5966	5.8432	6.48593	6.46923	6.40866	4.59431	4.58364
sp|P40358|JEM1_YEAST	JEM1	DnaJ-like chaperone JEM1	8	5.64347	5.98142	5.91094	8.87313	8.92153	8.738	10.9474	10.7376	10.6543	7.64016	7.8442	8.10786
sp|P36035|JEN1_YEAST	JEN1	Carboxylic acid transporter protein homolog	6	17.9008	19.4242	18.7948	12.5105	12.7527	13.1313	1.11828	1.05234	1.06021	0.805522	0.857391	0.591942
sp|P47156|JHD2_YEAST	JHD2	Histone demethylase JHD2	6	6.14731	5.68372	6.70413	20.0957	10.2028	10.5007	13.2402	4.97226	5.30907	5.40693	6.18147	5.55572
sp|Q03361|JIP4_YEAST	JIP4	Uncharacterized protein JIP4	15	13.7073	13.3718	13.6704	8.95199	9.32689	9.63226	5.82663	5.28252	6.322	4.88274	4.46795	4.55754
sp|Q06214|JIP5_YEAST	JIP5	WD repeat-containing protein JIP5	10	5.32343	5.08037	5.40187	5.48707	5.56443	5.61617	10.8066	10.5727	10.5912	11.8131	12.005	11.738
sp|P53863|JJJ1_YEAST	JJJ1	J protein JJJ1	7	5.80938	6.51329	5.72144	6.05429	6.19222	6.19244	11.3982	11.2893	10.3802	9.93936	10.4408	10.069
sp|P46997|JJJ2_YEAST	JJJ2	J protein JJJ2	2	5.359	5.85912	6.603	7.44272	7.89183	7.96811	9.83474	9.11226	10.2228	10.1315	9.72852	9.84645
sp|P40206|JLP2_YEAST	JLP2	Protein JLP2	3	9.4969	9.40601	9.27508	5.24376	6.54614	6.8089	11.2851	10.3592	10.2568	7.06324	7.21128	7.04766
sp|P36224|JNM1_YEAST	JNM1	Nuclear migration protein JNM1	2	5.76488	5.94256	6.77555	4.36312	4.15924	4.48904	11.3516	11.2015	11.3965	11.0213	11.9725	11.5623
sp|P47135|JSN1_YEAST	JSN1	Protein JSN1	11	7.27713	7.33006	7.17174	9.62531	9.99043	10.1167	7.92284	7.91419	7.75358	8.7944	8.19666	7.90694
sp|P36132|KAE1_YEAST	KAE1	tRNA N6-adenosine threonylcarbamoyltransferase	15	8.08361	7.90565	8.09715	8.55433	9.28102	8.74814	8.19979	8.34701	8.08432	8.09695	8.34257	8.25946
sp|P38217|IMB2_YEAST	KAP104	Importin subunit beta-2	24	6.6707	6.63966	6.74699	8.92344	9.18685	9.16485	7.99129	7.92775	7.45286	10.0388	9.64131	9.61549
sp|P53067|IMB5_YEAST	KAP114	Importin subunit beta-5	10	7.72493	7.95106	7.83268	7.36248	6.88516	7.65025	9.85514	10.2883	9.46896	8.11115	8.2692	8.60075
sp|Q02932|KA120_YEAST	KAP120	Importin beta-like protein KAP120	18	10.2892	10.0333	10.6602	7.39327	7.21989	7.92727	7.95866	7.61224	7.83155	7.52476	7.47313	8.07652
sp|P32767|KA122_YEAST	KAP122	Importin beta-like protein KAP122	12	5.08643	5.04219	5.12181	6.7002	7.11881	7.25005	9.18777	8.95676	8.25857	12.4093	12.4167	12.4513
sp|P40069|IMB4_YEAST	KAP123	Importin subunit beta-4	36	4.42143	4.51213	4.42873	7.41763	7.72523	7.43945	9.28735	9.35809	8.95522	12.2944	12.1079	12.0525
sp|Q06142|IMB1_YEAST	KAP95	Importin subunit beta-1	30	5.96602	5.77552	5.80424	9.46935	9.26122	8.96547	8.90411	8.40239	8.85464	9.23437	9.46542	9.89725
sp|P11927|KAR1_YEAST	KAR1	Cell division control protein KAR1	2	9.64008	9.80404	10.5046	7.72798	9.20304	8.60978	6.78093	7.30634	7.72198	7.76299	7.15328	7.78502
sp|P16474|BIP_YEAST	KAR2	Endoplasmic reticulum chaperone BiP	46	5.25765	4.97381	5.16411	11.3976	11.3281	11.338	9.09547	9.14295	9.28596	7.69966	7.81241	7.50437
sp|P17119|KAR3_YEAST	KAR3	Kinesin-like protein KAR3	1	3.30923	3.26191	3.33597	4.68528	4.76356	4.19404	12.4872	12.5487	10.2713	13.647	13.4733	14.0225
sp|P32526|KAR9_YEAST	KAR9	Karyogamy protein KAR9	3	5.33097	5.6086	6.20249	11.7486	12.0271	11.2558	6.71492	7.03326	5.1491	11.1932	10.1714	7.56454
sp|P25389|KCC4_YEAST	KCC4	Probable serine/threonine-protein kinase KCC4	5	3.72279	3.61365	3.93775	8.28209	8.10337	7.46168	10.681	10.6615	11.0713	10.993	11.6062	9.86565
sp|P47114|KCH1_YEAST	KCH1	Low affinity K(+) transporter 1	2	4.67537	5.43527	5.01549	4.82232	5.60759	5.44235	12.3927	11.502	11.653	11.5938	10.8515	11.0085
sp|Q12494|KCS1_YEAST	KCS1	Inositol hexakisphosphate kinase 1	11	6.05405	6.42799	6.32116	7.60322	7.6878	7.66632	8.81136	9.02948	8.65582	10.5418	10.5094	10.6916
sp|P36005|KDX1_YEAST	KDX1	Serine/threonine-protein kinase KDX1	1	7.92825	5.4348	7.06498	4.35719	3.7062	4.9256	14.6907	18.557	17.4048	4.16508	4.85679	6.9086
sp|P43614|KEG1_YEAST	KEG1	Beta-1,6-glucan synthesis-associated protein KEG1	1	7.60715	8.11038	10.0455	5.00555	4.88481	8.06641	7.86692	6.02754	6.76455	10.1618	11.8187	13.6406
sp|Q06346|KEI1_YEAST	KEI1	Inositol phosphorylceramide synthase regulatory subunit KEI1	4	8.48594	8.60217	8.96969	6.36561	6.50511	6.66372	11.442	9.88844	10.0991	7.62313	7.65339	7.70167
sp|P38853|KEL1_YEAST	KEL1	Kelch repeat-containing protein 1	25	7.7051	7.71043	7.85757	7.99949	8.34277	8.42362	8.17793	8.16317	8.15957	8.94004	9.1502	9.3701
sp|P50090|KEL2_YEAST	KEL2	Kelch repeat-containing protein 2	2	10.6546	10.8303	10.4414	10.016	10.3998	9.99066	6.27234	6.19043	6.42496	6.91771	5.66979	6.19197
sp|Q08979|KEL3_YEAST	KEL3	Kelch repeat-containing protein 3	13	4.16418	4.12124	4.32066	8.7333	8.43575	8.54951	9.07341	8.3088	9.02196	10.9439	11.7466	12.5807
sp|P35844|KES1_YEAST	KES1	Oxysterol-binding protein homolog 4	31	6.80081	6.7736	6.75528	7.2168	6.75723	6.79133	10.1574	10.0696	11.0049	8.81063	8.86086	10.0016
sp|P09620|KEX1_YEAST	KEX1	Pheromone-processing carboxypeptidase KEX1	18	1.64357	1.76192	1.69619	10.3992	10.9922	10.6019	7.77255	7.92035	7.19278	13.8583	13.21	12.951
sp|P13134|KEX2_YEAST	KEX2	Kexin	2	5.93512	6.93765	6.08968	4.6957	5.45279	5.0932	11.7486	11.4683	12.2604	10.0465	10.2165	10.0556
sp|P20967|ODO1_YEAST	KGD1	2-oxoglutarate dehydrogenase, mitochondrial	42	11.4174	11.4628	11.1574	15.3115	11.7252	15.69	3.94838	3.99848	4.14762	3.74407	3.73343	3.66369
sp|P19262|ODO2_YEAST	KGD2	Dihydrolipoyllysine-residue succinyltransferase component of 2-oxoglutarate dehydrogenase complex, mitochondrial	31	12.9561	13.8601	13.6214	14.3748	13.2392	14.5878	3.01768	2.98084	3.17056	2.78928	2.72412	2.67811
sp|P40309|KHA1_YEAST	KHA1	K(+)/H(+) antiporter 1	1	6.25898	7.91817	6.8002	4.95316	3.67079	5.41577	12.402	10.4167	11.3175	9.22457	11.1034	10.5188
sp|P38692|KIC1_YEAST	KIC1	Serine/threonine-protein kinase KIC1	8	6.8084	6.71947	6.98338	9.36471	8.31904	8.40153	9.36422	8.12067	7.98424	9.08037	9.39968	9.4543
sp|P13185|KIN1_YEAST	KIN1	Serine/threonine protein kinase KIN1	27	11.3946	11.1261	11.6837	9.00387	9.44869	9.15183	6.27664	6.26398	6.75653	6.46062	6.33714	6.09635
sp|P13186|KIN2_YEAST	KIN2	Serine/threonine-protein kinase KIN2	15	6.92574	7.00471	7.07561	9.17435	9.25031	9.18751	7.69714	7.51155	7.75045	9.57142	9.51738	9.33382
sp|P06242|KIN28_YEAST	KIN28	Serine/threonine-protein kinase KIN28	8	7.33586	6.7622	7.96291	7.73401	8.36297	7.95729	8.77515	8.44567	8.72544	9.35768	9.22091	9.3599
sp|P22209|KIN3_YEAST	KIN3	Serine/threonine-protein kinase KIN3	1	3.28736	2.17306	4.50066	4.27969	4.99945	2.83616	11.9144	15.7772	16.8276	9.86774	10.4838	13.0529
sp|Q01919|KIN4_YEAST	KIN4	Serine/threonine-protein kinase KIN4	1	8.04223	8.54816	12.1735	7.45894	7.8473	7.87137	7.72884	7.56585	9.08268	10.2799	6.89412	6.50711
sp|P28743|KIP2_YEAST	KIP2	Kinesin-like protein KIP2	2	3.46331	3.53188	3.61434	2.92718	3.49598	3.04128	13.9656	14.8645	13.7923	13.0179	12.6583	11.6275
sp|P53086|KIP3_YEAST	KIP3	Kinesin-like protein KIP3	1	3.87733	4.22147	3.47594	4.50887	4.86075	4.65259	11.8951	13.7477	10.5288	13.5499	11.6617	13.0198
sp|P36004|KKQ8_YEAST	KKQ8	Probable serine/threonine-protein kinase KKQ8	4	5.96025	6.01501	5.96664	15.5152	15.9333	16.1978	3.51097	3.37736	3.56369	7.70551	8.17024	8.08405
sp|P32350|KNS1_YEAST	KNS1	Dual specificity protein kinase KNS1	9	21.5817	21.2138	20.4701	8.81696	9.26315	9.05405	1.68834	1.61465	1.77472	1.56058	1.46842	1.49354
sp|P38873|KOG1_YEAST	KOG1	Target of rapamycin complex 1 subunit KOG1	20	7.68124	7.48687	7.3278	8.4764	8.81919	8.8018	7.6084	8.16789	7.88847	9.17216	9.15893	9.41085
sp|P27809|KRE2_YEAST	KRE2	Glycolipid 2-alpha-mannosyltransferase	20	2.978	3.0125	2.93641	7.87619	8.51513	8.5863	10.7731	10.4401	9.85476	11.9732	11.7442	11.3101
sp|Q04431|KRE28_YEAST	KRE28	Spindle pole body component KRE28	3	7.20729	7.7473	7.94898	7.94251	8.44292	8.49078	8.63467	8.23714	8.7547	8.90779	8.97069	8.71524
sp|P53914|NAT10_YEAST	KRE33	RNA cytidine acetyltransferase	33	5.37581	5.76768	5.71609	6.03403	6.40745	6.38725	9.76518	9.66262	9.46697	12.018	11.6683	11.7306
sp|P22023|KRE5_YEAST	KRE5	Killer toxin-resistance protein 5	18	7.47147	7.45877	7.6738	12.005	12.3007	11.9016	6.41802	6.412	6.14561	7.26803	7.51609	7.42891
sp|P32486|KRE6_YEAST	KRE6	Beta-glucan synthesis-associated protein KRE6	13	2.99264	3.03342	2.78123	3.79936	3.67863	3.60928	14.0283	13.6743	13.9618	11.7969	12.8993	13.7448
sp|P39005|KRE9_YEAST	KRE9	Cell wall synthesis protein KRE9	4	4.01444	4.37192	4.14724	4.48781	4.66508	4.95068	12.8098	14.6571	11.03	11.3123	11.8264	11.7273
sp|P42846|KRI1_YEAST	KRI1	Protein KRI1	27	5.48428	5.3119	5.1781	4.95542	5.13793	5.13448	11.4175	11.1517	11.5256	11.6961	11.6432	11.3638
sp|P25586|KRR1_YEAST	KRR1	KRR1 small subunit processome component	20	5.79791	5.51565	5.61744	5.89615	5.79021	5.60467	10.6489	10.0497	11.1824	11.3158	11.2725	11.3087
sp|P15180|SYKC_YEAST	KRS1	Lysine--tRNA ligase, cytoplasmic	44	5.16472	5.14224	5.21607	4.85749	5.04737	4.86371	11.1175	10.9586	10.9437	12.4565	12.2184	12.0136
sp|Q8TGJ3|KISH_YEAST	KSH1	Protein kish	2	8.68617	9.28085	8.75222	8.83041	9.74967	9.64074	7.76266	7.8658	6.41585	7.95718	7.68406	7.37439
sp|P38691|KSP1_YEAST	KSP1	Serine/threonine-protein kinase KSP1	10	5.11694	4.99046	5.55369	9.17002	9.30942	8.78922	9.36549	8.25374	8.90741	10.1879	10.0699	10.2859
sp|P14681|KSS1_YEAST	KSS1	Mitogen-activated protein kinase KSS1	1	6.31613	5.93123	6.37992	8.15049	6.38386	6.47796	9.46838	7.51651	10.5108	9.70297	10.0537	13.1081
sp|Q3E840|DPH3_YEAST	KTI11	Diphthamide biosynthesis protein 3	1	1.71153	2.22154	2.18664	3.9149	3.66129	3.3522	7.01271	8.27678	14.6417	14.4699	19.7799	18.7709
sp|P34253|KTI12_YEAST	KTI12	Protein KTI12	7	7.34105	7.63294	7.41543	4.95517	5.21771	5.30972	11.5435	12.3173	11.6231	8.76947	9.1935	8.68109
sp|P27810|KTR1_YEAST	KTR1	Alpha-1,2 mannosyltransferase KTR1	17	4.82368	4.95177	4.81036	6.24789	6.32416	6.01521	11.9534	12.1421	11.6579	10.1329	10.2979	10.6427
sp|P38130|KTR3_YEAST	KTR3	Probable mannosyltransferase KTR3	14	6.132	6.43727	6.43344	10.3216	10.5371	10.2205	7.34073	7.23293	7.3249	9.42706	9.35894	9.23352
sp|P38131|KTR4_YEAST	KTR4	Probable mannosyltransferase KTR4	14	3.64004	4.06558	3.83323	8.82503	8.65808	8.73114	9.49393	9.85054	8.89527	12.0788	11.0435	10.8848
sp|P53966|KTR5_YEAST	KTR5	Probable mannosyltransferase KTR5	1	7.3739	7.06977	6.88192	8.40497	9.39897	8.72063	8.84379	9.68507	9.01493	8.53215	7.90297	8.17092
sp|P54070|KTR6_YEAST	KTR6	Mannosyltransferase KTR6	9	5.6481	5.35975	5.77243	4.78677	4.69747	4.92803	12.5537	12.572	12.7378	10.186	10.2192	10.5388
sp|P40504|KTR7_YEAST	KTR7	Probable mannosyltransferase KTR7	5	4.76082	5.27508	5.12946	6.78891	6.9234	6.96611	11.0497	10.9252	10.8761	10.8663	10.5808	9.85816
sp|P53158|KXD1_YEAST	KXD1	Biogenesis of lysosome-related organelles complex 1 subunit KXD1	4	9.92683	8.11336	8.40483	7.82665	7.61093	7.7317	8.25019	7.94015	8.24686	8.82849	8.82905	8.29096
sp|P39526|LAA1_YEAST	LAA1	AP-1 accessory protein LAA1	31	6.45849	6.50723	6.73791	8.00897	8.15353	8.11952	8.63231	8.67643	8.22912	10.2502	10.1953	10.031
sp|P28496|LAC1_YEAST	LAC1	Ceramide synthase LAC1	3	8.53232	9.74656	11.2273	7.71141	8.9993	10.1881	6.72561	6.36276	6.6841	8.22445	7.78595	7.81215
sp|P38703|LAG1_YEAST	LAG1	Ceramide synthase LAG1	7	6.7578	6.80877	7.33982	8.40172	9.30093	9.17889	8.09909	8.14983	8.4187	9.32349	9.26476	8.95621
sp|Q92325|LAG2_YEAST	LAG2	Cullin-associated NEDD8-dissociated protein 1 homolog	10	12.5476	13.1171	13.2487	10.2229	10.7668	10.2513	5.43645	5.59409	5.06499	4.57496	4.61744	4.55772
sp|P38851|LAM1_YEAST	LAM1	Membrane-anchored lipid-binding protein LAM1	5	10.062	10.2073	10.8073	17.4085	15.6266	16.4642	3.82918	3.79139	3.85407	2.69187	2.67511	2.58257
sp|P38800|LAM4_YEAST	LAM4	Membrane-anchored lipid-binding protein LAM4	6	14.6219	15.6592	15.5096	9.19028	9.73853	9.63678	4.39113	4.57116	4.59378	4.02364	3.7551	4.30898
sp|P43560|LAM5_YEAST	LAM5	Membrane-anchored lipid-binding protein LAM5	7	10.3807	10.6652	10.8681	10.7289	10.9713	11.1669	5.68173	5.11371	5.22698	6.46674	6.07144	6.65827
sp|Q08001|LAM6_YEAST	LAM6	Membrane-anchored lipid-binding protein LAM6	10	12.6241	13.0601	13.3933	7.52727	7.82633	7.7152	6.46079	6.2965	6.14033	6.49279	6.32191	6.14129
sp|Q10740|LKHA4_YEAST	LAP2	Leucine aminopeptidase 2	29	9.89737	10.1162	9.75898	12.861	13.2807	13.1712	4.41872	4.63684	4.52238	5.84941	5.74888	5.73827
sp|P36146|LAS1_YEAST	LAS1	Protein LAS1	3	6.02544	6.50172	7.01086	6.96493	7.06973	7.66486	9.50198	8.83589	8.47123	10.4765	10.8574	10.6194
sp|Q12446|LAS17_YEAST	LAS17	Proline-rich protein LAS17	4	9.20838	10.5514	9.90652	8.38801	8.67167	8.56527	7.55399	7.87857	7.20714	7.11624	8.01418	6.93868
sp|P40367|GPI7_YEAST	LAS21	GPI ethanolamine phosphate transferase 2	4	5.53289	6.20116	6.40155	11.2778	11.587	12.5071	7.46643	7.36892	6.70209	8.43068	8.67837	7.84602
sp|P12695|ODP2_YEAST	LAT1	Dihydrolipoyllysine-residue acetyltransferase component of pyruvate dehydrogenase complex, mitochondrial	34	11.9547	11.9172	12.1445	10.0592	10.1342	10.0244	5.53976	5.39716	5.844	5.68303	5.77557	5.52634
sp|P25045|LCB1_YEAST	LCB1	Serine palmitoyltransferase 1	11	7.24916	7.43924	7.39081	6.38334	6.99628	6.65238	10.651	10.8081	10.2013	8.8041	8.7447	8.67959
sp|P40970|LCB2_YEAST	LCB2	Serine palmitoyltransferase 2	13	7.85517	8.01251	8.13721	7.46845	8.01488	7.79769	8.62581	8.70178	8.86239	8.93734	8.96172	8.62506
sp|Q12246|LCB4_YEAST	LCB4	Sphingoid long chain base kinase 4	19	11.9768	11.8924	11.9956	4.84977	5.03576	5.05135	9.51385	9.57012	9.37607	7.07739	6.88474	6.77615
sp|Q06147|LCB5_YEAST	LCB5	Sphingoid long chain base kinase 5	4	8.81482	8.52939	8.60826	9.80182	8.43275	8.4923	8.11556	7.93933	10.2304	6.79212	6.71098	7.53226
sp|Q04377|LCD1_YEAST	LCD1	DNA damage checkpoint protein LCD1	2	6.82203	7.56479	7.11605	8.95211	8.83879	8.86	8.76027	7.87127	7.76909	8.82491	8.80199	9.8187
sp|P53153|LCL3_YEAST	LCL3	Probable endonuclease LCL3	4	11.5554	10.9422	10.3472	10.6043	11.2135	11.0081	5.99182	5.19127	5.84326	5.79076	5.79626	5.71589
sp|P40079|LCP5_YEAST	LCP5	U3 small nucleolar ribonucleoprotein protein LCP5	13	3.78444	3.46134	3.66924	3.82464	4.13573	3.78618	12.2134	11.8952	12.2676	13.8271	13.4532	13.682
sp|Q12342|LDB17_YEAST	LDB17	Protein LDB17	3	9.09991	12.2271	11.059	8.40338	9.39362	10.2482	6.66947	9.23149	6.71571	5.50611	6.66525	4.78069
sp|Q12502|LDB19_YEAST	LDB19	Protein LDB19	12	6.50713	6.84706	6.55033	7.16227	6.59454	6.9061	10.1649	9.63288	9.89884	10.0972	9.90472	9.73403
sp|P38210|LDB7_YEAST	LDB7	Chromatin structure-remodeling complex protein RSC14	2	4.62779	4.25242	3.92496	5.84153	5.80946	5.75724	10.7059	10.2057	12.7057	10.8237	11.571	13.7747
sp|P38139|LDH1_YEAST	LDH1	Lipid droplet hydrolase 1	9	10.7853	11.3695	11.2643	9.66117	11.0146	10.5726	6.40941	6.18418	5.56654	5.7893	5.75834	5.62479
sp|Q08963|RU2A_YEAST	LEA1	U2 small nuclear ribonucleoprotein A'	4	6.71654	6.55613	6.72677	5.89767	6.06457	5.27917	10.9848	12.1322	10.5869	10.0836	9.27057	9.7011
sp|Q02799|LEE1_YEAST	LEE1	Zinc finger protein LEE1	5	25.8865	25.0689	26.3085	6.53791	6.11954	6.72212	0.545373	0.570978	0.786587	0.519578	0.511642	0.422257
sp|P42838|LEM3_YEAST	LEM3	Alkylphosphocholine resistance protein LEM3	13	9.73306	10.2765	10.6647	5.63	5.80895	5.75738	8.84586	8.97774	8.08993	9.07574	8.76701	8.3731
sp|P38439|LEO1_YEAST	LEO1	RNA polymerase-associated protein LEO1	16	6.1369	5.9633	6.09415	6.82214	6.78365	6.95085	9.27586	9.58357	9.95293	10.931	10.6237	10.882
sp|P07264|LEUC_YEAST	LEU1	3-isopropylmalate dehydratase	42	6.38335	5.58576	5.73854	7.59178	6.7247	6.77861	11.5988	10.8702	12.0697	8.4483	8.60053	9.60973
sp|P08638|LEUR_YEAST	LEU3	Regulatory protein LEU3	5	7.27263	7.43769	7.60498	7.77934	7.70081	7.98114	9.1058	8.86714	8.91332	8.71339	9.16685	9.45691
sp|P06208|LEU1_YEAST	LEU4	2-isopropylmalate synthase	1	6.27979	6.31711	6.8305	6.24852	5.94961	5.73765	10.933	10.324	11.8499	10.1234	9.90155	9.50502
sp|P38702|LEU5_YEAST	LEU5	Mitochondrial carrier protein LEU5	4	11.7645	11.8779	13.4145	8.98931	10.0544	9.65479	6.13724	6.57355	5.5501	5.79619	5.27126	4.91626
sp|Q12166|LEU9_YEAST	LEU9	2-isopropylmalate synthase 2, mitochondrial	8	6.38293	6.55723	6.6701	4.68352	4.65783	4.73672	12.7882	12.6289	12.9315	8.96699	9.47509	9.52096
sp|Q02796|LGE1_YEAST	LGE1	Transcriptional regulatory protein LGE1	6	5.91183	5.67017	5.88183	6.37859	6.49215	6.32962	10.8975	10.8846	10.4527	10.3157	10.2295	10.5558
sp|P33399|LHP1_YEAST	LHP1	La protein homolog	12	5.42486	5.0776	5.2532	5.16941	6.2068	6.25835	9.75172	9.13809	9.40125	12.9766	12.9443	12.3979
sp|P36016|LHS1_YEAST	LHS1	Heat shock protein 70 homolog LHS1	32	6.17369	6.16696	6.26107	8.32646	8.3311	8.40707	10.0884	9.87013	9.75759	8.75339	8.94501	8.91908
sp|P47120|DOHH_YEAST	LIA1	Deoxyhypusine hydroxylase	25	2.82616	2.66758	2.73814	3.81703	3.96809	3.75417	14.0192	13.8007	13.3972	12.9415	13.0103	13.0598
sp|P53150|LIF1_YEAST	LIF1	Ligase-interacting factor 1	2	5.52868	6.34079	6.31362	5.16464	6.60894	6.20462	11.582	12.0649	8.45642	11.4137	11.2138	9.10787
sp|Q03579|LIP1_YEAST	LIP1	Ceramide synthase subunit LIP1	1	10.6378	11.0524	11.5843	10.9738	11.9697	11.5969	4.3565	4.17545	4.96914	6.16754	6.2943	6.22218
sp|Q06005|LIPB_YEAST	LIP2	Octanoyltransferase, mitochondrial	9	10.3525	11.3354	10.8398	7.93445	8.28082	8.76096	8.61732	8.32572	8.48926	5.4162	5.79585	5.85172
sp|P32875|LIPA_YEAST	LIP5	Lipoyl synthase, mitochondrial	11	3.29072	3.07823	3.20694	10.3305	10.6277	10.3987	10.7421	10.2068	10.9421	9.19298	9.04731	8.93604
sp|Q07799|LMO1_YEAST	LMO1	ELMO family protein LMO1	8	8.31562	8.84565	9.42011	9.52122	10.5386	10.2958	6.79117	6.62066	5.71402	7.95156	8.67383	7.31182
sp|P38878|LNP_YEAST	LNP1	Endoplasmic reticulum junction formation protein lunapark	10	6.63779	6.56493	6.24319	6.69831	7.09198	7.04329	9.78802	9.84955	9.36178	10.3976	10.1028	10.2208
sp|Q06508|LOA1_YEAST	LOA1	Lysophosphatidic acid:oleoyl-CoA acyltransferase 1	7	6.85449	6.75947	6.53321	6.78503	7.66735	7.93243	9.70554	9.89894	10.0964	9.31936	9.531	8.91673
sp|P43586|LOC1_YEAST	LOC1	60S ribosomal subunit assembly/export protein LOC1	8	8.38287	8.53098	8.4185	6.04831	6.13701	6.13878	10.2984	10.1605	9.85991	9.01234	8.73786	8.27454
sp|P33418|XPOT_YEAST	LOS1	Exportin-T	12	5.20878	5.35473	5.91697	6.69393	6.5537	6.86359	11.1837	10.6832	9.89417	10.4987	10.5659	10.5827
sp|P34234|LOT5_YEAST	LOT5	Protein LOT5	2	7.01239	7.60447	6.76332	8.72678	9.58261	8.9878	6.6145	6.80132	6.76529	10.7208	9.96703	10.4536
sp|Q07923|LOT6_YEAST	LOT6	NAD(P)H-dependent FMN reductase LOT6	3	14.7619	15.0202	14.5465	7.54822	7.87704	8.17127	6.28499	6.25845	7.05877	4.0689	4.2854	4.1183
sp|P09624|DLDH_YEAST	LPD1	Dihydrolipoyl dehydrogenase, mitochondrial	48	11.1127	10.8272	10.9838	14.9846	14.593	15.1773	3.64422	3.46626	3.98113	3.77061	3.76114	3.69811
sp|Q08448|LPL1_YEAST	LPL1	Lipid droplet phospholipase 1	9	16.0451	16.0161	15.8121	9.17269	9.89513	10.0244	4.00407	4.34317	4.21761	3.62296	3.4802	3.36644
sp|Q04396|LPP1_YEAST	LPP1	Lipid phosphate phosphatase 1	3	8.33013	9.21967	8.4264	6.56284	7.08457	7.21407	9.11566	9.2695	8.82536	9.43224	8.44193	8.07762
sp|Q12405|LPX1_YEAST	LPX1	Peroxisomal membrane protein LPX1	2	18.3139	15.8574	14.9619	9.75619	8.76699	10.8686	4.29284	4.53788	4.79383	3.48738	2.37998	1.98311
sp|P35688|LRG1_YEAST	LRG1	Rho-GTPase-activating protein LRG1	4	5.02877	4.61303	5.38494	10.2383	9.78949	9.70408	7.87783	8.19087	7.5394	10.2735	10.3176	11.0421
sp|P40345|PDAT_YEAST	LRO1	Phospholipid:diacylglycerol acyltransferase	5	6.39158	6.46882	6.60633	6.55665	6.80653	6.53548	10.352	10.7057	8.9447	9.99662	10.4239	10.2116
sp|P38801|LRP1_YEAST	LRP1	Exosome complex protein LRP1	6	6.05868	5.25079	5.8789	5.72498	5.56691	5.81463	11.1163	10.7791	10.9017	10.5657	11.6438	10.6986
sp|Q04087|LRS4_YEAST	LRS4	Monopolin complex subunit LRS4	3	8.98002	8.06335	8.72906	8.02804	6.60597	7.29305	9.26739	8.67593	10.0044	8.07833	8.44072	7.83371
sp|P53281|LSB1_YEAST	LSB1	LAS seventeen-binding protein 1	4	5.42697	5.48832	5.48653	6.47682	6.58215	6.10934	10.495	11.1364	10.7796	10.4626	10.8786	10.6776
sp|P43603|LSB3_YEAST	LSB3	LAS seventeen-binding protein 3	7	8.7054	8.27671	8.27182	9.92538	10.4131	10.3355	5.53634	5.45358	5.88967	9.16424	8.91001	9.11821
sp|P25369|LSB5_YEAST	LSB5	LAS seventeen-binding protein 5	8	8.36258	8.16966	8.05136	10.6438	10.8095	10.4524	6.60646	6.61973	6.36811	7.80455	8.08204	8.02983
sp|P42951|LSB6_YEAST	LSB6	Phosphatidylinositol 4-kinase LSB6	8	15.0942	14.0023	14.4486	10.0071	9.52897	9.44671	5.87169	5.59092	5.83613	3.23689	3.36919	3.56731
sp|P53598|SUCA_YEAST	LSC1	Succinate--CoA ligase [ADP-forming] subunit alpha, mitochondrial	27	15.3406	14.7875	14.9372	8.26135	8.50347	8.2481	5.52958	5.51293	5.59	4.36401	4.40092	4.52437
sp|P53312|SUCB_YEAST	LSC2	Succinate--CoA ligase [ADP-forming] subunit beta, mitochondrial	32	16.5075	16.8442	16.9118	9.59176	9.20039	9.43527	4.1732	4.03372	4.42183	2.9813	2.99939	2.89961
sp|P53145|LSG1_YEAST	LSG1	Large subunit GTPase 1	23	4.27959	4.20646	4.39391	6.63632	6.73753	6.57066	8.60168	8.44716	8.38841	13.9649	13.8355	13.9378
sp|P47017|LSM1_YEAST	LSM1	Sm-like protein LSm1	8	6.87341	6.63591	7.14929	7.23313	7.55125	7.29287	9.41816	9.69026	9.0542	10.1569	9.35189	9.59271
sp|P38828|LSM12_YEAST	LSM12	Protein LSM12	11	8.28458	7.9931	7.97097	5.32739	5.09388	5.33479	10.7501	10.7472	11.4322	8.57716	8.80936	9.67922
sp|P38203|LSM2_YEAST	LSM2	U6 snRNA-associated Sm-like protein LSm2	3	5.17012	7.28736	7.09063	7.67281	6.47762	6.84651	9.86987	10.3303	10.0758	9.57809	10.1041	9.49686
sp|P57743|LSM3_YEAST	LSM3	U6 snRNA-associated Sm-like protein LSm3	2	5.7881	7.10425	4.99436	6.55367	8.1482	8.93536	7.31693	10.3659	8.25916	11.0732	12.826	8.63479
sp|P40070|LSM4_YEAST	LSM4	U6 snRNA-associated Sm-like protein LSm4	3	8.10209	8.61427	8.5082	7.59829	8.21606	7.86278	8.3131	9.43506	8.58679	8.33001	7.64375	8.7896
sp|P40089|LSM5_YEAST	LSM5	U6 snRNA-associated Sm-like protein LSm5	4	5.59518	4.33625	4.6387	12.2135	10.2888	8.82925	5.90556	10.6532	4.07239	13.8647	9.77259	9.82993
sp|Q06406|LSM6_YEAST	LSM6	U6 snRNA-associated Sm-like protein LSm6	6	6.37988	5.21153	5.71633	6.38866	4.86717	5.2098	10.0111	9.10204	11.1933	9.42613	11.721	14.773
sp|P53905|LSM7_YEAST	LSM7	U6 snRNA-associated Sm-like protein LSm7	3	6.53739	6.88421	6.89278	7.84117	8.02266	8.43611	9.09705	8.53196	8.41236	9.58979	10.4331	9.32141
sp|P47093|LSM8_YEAST	LSM8	U6 snRNA-associated Sm-like protein LSm8	3	7.98828	8.38188	8.05932	9.95681	9.44161	9.25819	8.29162	8.89339	8.42731	7.72356	6.67754	6.90049
sp|Q3E772|LSO2_YEAST	LSO2	Protein LSO2	6	6.93478	6.63156	7.38758	9.11263	8.84406	9.33455	8.01681	8.15353	8.32998	8.7503	9.62372	8.88051
sp|Q12230|LSP1_YEAST	LSP1	Sphingolipid long chain base-responsive protein LSP1	32	12.4466	12.5992	12.6282	10.8026	11.4217	11.4065	4.39369	4.77014	4.2027	5.29018	5.20347	4.835
sp|P34239|LST4_YEAST	LST4	Protein LST4	5	10.8283	9.5773	10.4046	7.08043	8.29363	7.76304	7.42986	7.38536	7.00502	7.70023	7.87576	8.65651
sp|P53237|LST7_YEAST	LST7	Protein LST7	2	9.06688	9.22907	9.14039	7.42287	9.24631	8.6398	8.02767	8.41301	8.47645	7.46859	8.05021	6.81874
sp|P41318|LST8_YEAST	LST8	Target of rapamycin complex subunit LST8	4	8.61939	9.01723	8.6556	10.0705	10.3566	10.1247	7.30586	7.01522	7.00279	7.71315	7.1691	6.94986
sp|P07866|LTE1_YEAST	LTE1	Guanine nucleotide exchange factor LTE1	12	5.57583	5.63782	5.5102	6.47719	6.29411	6.24576	10.4191	9.93176	10.7915	11.028	11.0227	11.066
sp|P53846|LTO1_YEAST	LTO1	Protein LTO1	3	5.43408	6.24378	5.93964	7.88886	8.62622	7.48581	9.9766	10.5456	9.3409	9.28932	9.49534	9.73384
sp|P40347|PPAL_YEAST	LTP1	Low molecular weight phosphotyrosine protein phosphatase	5	4.13372	3.32077	4.24402	7.61806	7.23639	7.73026	11.2243	10.2712	11.5977	8.76022	10.7749	13.0885
sp|P34078|LTV1_YEAST	LTV1	Protein LTV1	8	3.30794	3.25486	3.26978	3.64468	3.84555	3.756	10.9987	10.9475	12.3748	14.371	15.0922	15.1371
sp|Q07508|LUC7_YEAST	LUC7	Protein LUC7	6	9.06815	9.26881	9.45154	7.46515	7.71331	7.62336	8.03159	8.48614	8.27834	8.30796	8.01226	8.2934
sp|P32487|LYP1_YEAST	LYP1	Lysine-specific permease	5	3.89578	3.75049	3.64052	1.49635	1.49754	1.54934	20.8135	19.9747	20.5934	7.40327	7.51483	7.87029
sp|P38998|LYS1_YEAST	LYS1	Saccharopine dehydrogenase [NAD(+), L-lysine-forming]	24	13.755	14.0445	13.8247	8.55204	8.44019	8.42376	6.67634	6.69745	7.18469	4.20644	4.09114	4.10375
sp|P40495|LYS12_YEAST	LYS12	Homoisocitrate dehydrogenase, mitochondrial	31	11.9115	12.4057	12.3216	8.54223	8.55499	8.60001	7.25974	7.40166	6.77193	5.32133	5.55173	5.35765
sp|P40971|LYS14_YEAST	LYS14	Lysine biosynthesis regulatory protein LYS14	4	2.65038	3.17153	2.40032	5.9729	5.53237	5.89244	12.6051	11.6963	11.6141	14.1796	11.201	13.0839
sp|P07702|LYS2_YEAST	LYS2	L-2-aminoadipate reductase	37	15.4678	16.057	15.6132	0.55393	0.567344	0.754862	17.6281	17.1774	14.0512	0.58585	0.6933	0.850003
sp|P48570|HOSC_YEAST	LYS20	Homocitrate synthase, cytosolic isozyme	14	7.07913	6.47389	6.47681	5.10046	4.5883	4.48207	8.93645	9.42796	9.79659	12.1811	12.616	12.8413
sp|Q12122|HOSM_YEAST	LYS21	Homocitrate synthase, mitochondrial	8	6.30306	6.12436	6.05259	7.57596	5.71137	5.76754	10.1431	8.79024	14.1158	8.16115	9.02814	12.2267
sp|P49367|LYS4_YEAST	LYS4	Homoaconitase, mitochondrial	34	13.0686	12.917	13.0731	3.07306	2.93432	3.1825	13.2966	13.0922	13.3463	3.83295	4.03984	4.1435
sp|P38999|LYS9_YEAST	LYS9	Saccharopine dehydrogenase [NADP(+), L-glutamate-forming]	19	9.25976	8.89738	9.33599	8.34699	8.51162	8.51606	8.56335	8.2229	8.65183	6.85623	7.30114	7.53675
sp|P40957|MAD1_YEAST	MAD1	Spindle assembly checkpoint component MAD1	14	6.2216	6.42209	6.50024	7.42411	7.60036	7.23371	8.80207	8.86097	8.83126	10.5526	10.6117	10.9392
sp|P40958|MAD2_YEAST	MAD2	Mitotic spindle checkpoint component MAD2	8	6.89635	6.87726	6.9092	7.27608	7.34656	7.31807	10.071	9.99054	10.4285	8.93747	8.95616	8.99282
sp|P47074|MAD3_YEAST	MAD3	Spindle assembly checkpoint component MAD3	2	6.17322	6.98971	7.44477	7.99742	9.52557	7.09665	9.88824	8.63674	9.51655	8.09951	9.53146	9.10017
sp|P36013|MAOM_YEAST	MAE1	NAD-dependent malic enzyme, mitochondrial	28	5.79977	5.71551	5.8484	9.556	9.42517	9.44946	10.2239	9.75914	9.8589	8.04226	8.0448	8.27673
sp|P41910|MAF1_YEAST	MAF1	Repressor of RNA polymerase III transcription MAF1	5	12.1697	12.0486	11.7963	9.43962	9.60239	9.9306	5.83352	6.00377	6.43982	5.75302	5.77555	5.2072
sp|P22134|MAG_YEAST	MAG1	DNA-3-methyladenine glycosylase	9	12.938	12.6905	13.0611	7.66985	8.16672	8.44476	6.55301	6.18891	6.46342	5.99016	5.88556	5.94802
sp|Q06436|MAG2_YEAST	MAG2	RING-finger protein MAG2	3	4.8787	6.61348	5.60054	6.91944	5.09555	5.08785	11.6255	10.0328	11.0643	10.7217	10.1499	12.2102
sp|Q02197|NAA35_YEAST	MAK10	N-alpha-acetyltransferase 35, NatC auxiliary subunit	7	6.62442	7.1394	6.89579	7.20518	7.01992	6.58961	10.6713	10.2749	10.6674	8.87965	9.05528	8.97709
sp|P20484|MAK11_YEAST	MAK11	Protein MAK11	12	6.8072	7.49219	6.89233	8.13812	7.88796	7.86768	8.07966	9.27269	7.83344	9.71395	9.84383	10.1709
sp|P10962|MAK16_YEAST	MAK16	Protein MAK16	3	1.93405	1.81658	2.00127	4.36888	4.53759	4.49842	13.8634	14.4415	13.6819	13.3978	12.615	12.8436
sp|Q12176|MAK21_YEAST	MAK21	Ribosome biogenesis protein MAK21	25	4.70411	4.60126	4.608	4.7513	5.02167	4.80348	12.1122	11.7952	11.7054	11.9353	11.7537	12.2083
sp|Q03503|NAA30_YEAST	MAK3	N-alpha-acetyltransferase 30	3	3.09241	2.55373	3.91902	4.32167	4.31954	4.52742	12.9364	12.568	12.0607	13.5047	13.4362	12.7602
sp|P23060|MAK32_YEAST	MAK32	Protein MAK32	3	11.0485	11.5615	10.981	8.98998	9.31372	9.69939	6.3111	6.42303	6.56939	6.22113	6.45594	6.42535
sp|P38112|MAK5_YEAST	MAK5	ATP-dependent RNA helicase MAK5	20	5.68188	5.44729	5.50594	4.35316	4.54986	4.69863	13.0498	12.1394	12.577	10.6209	10.7445	10.6316
sp|P40065|MAM1_YEAST	MAM1	Monopolin complex subunit MAM1	1	7.09905	6.51077	9.16339	8.64073	5.97656	6.03553	7.47358	7.27621	11.0527	11.8667	9.3114	9.59337
sp|Q12296|MAM3_YEAST	MAM3	Protein MAM3	11	8.37587	8.26009	8.5781	7.53652	7.67867	7.85239	7.73482	7.59685	7.92219	9.42497	9.55404	9.4855
sp|P40513|MAM33_YEAST	MAM33	Mitochondrial acidic protein MAM33	6	7.36959	8.92875	7.69358	11.6811	11.7599	11.824	7.20504	7.36724	9.54828	5.38783	5.60326	5.63138
sp|Q01662|MAP1_YEAST	MAP1	Methionine aminopeptidase 1	16	1.90431	1.81778	1.83616	9.08333	8.68721	8.53423	7.66625	7.53859	7.34442	14.7724	15.2598	15.5555
sp|P38174|MAP2_YEAST	MAP2	Methionine aminopeptidase 2	18	6.16122	6.41343	6.40894	9.83764	9.82527	10.0772	6.86339	6.76305	6.99582	10.443	10.2737	9.93731
sp|P10507|MPPB_YEAST	MAS1	Mitochondrial-processing peptidase subunit beta	12	9.03348	8.63279	8.87105	9.69598	9.42785	9.23269	8.7368	8.68893	8.75278	6.10295	6.4118	6.4129
sp|P11914|MPPA_YEAST	MAS2	Mitochondrial-processing peptidase subunit alpha	22	8.41734	8.64711	8.70154	9.41226	8.82785	8.9052	9.13787	9.0624	9.21751	6.45464	6.67438	6.54191
sp|P38300|MBA1_YEAST	MBA1	Inner membrane mitoribosome receptor MBA1, mitochondrial	5	10.0984	10.2562	10.1431	12.3284	12.7932	12.598	6.37595	6.1576	6.32235	4.3626	4.44319	4.12093
sp|O14467|MBF1_YEAST	MBF1	Multiprotein-bridging factor 1	13	6.758	5.53778	5.87075	12.7148	10.4064	10.0869	6.54211	6.05257	7.54936	8.94168	9.37962	10.16
sp|P39678|MBP1_YEAST	MBP1	Transcription factor MBP1	5	8.429	7.66164	7.95496	8.75262	8.53294	8.09191	7.95769	8.06711	8.6556	8.95574	8.57704	8.36374
sp|P23493|MBR1_YEAST	MBR1	Mitochondrial biogenesis regulation protein 1	2	21.8909	18.3181	18.6032	10.6229	9.68159	10.5789	0.887538	1.56485	2.32881	1.72382	2.01076	1.7887
sp|Q08601|MCA1_YEAST	MCA1	Metacaspase-1	10	7.11133	6.99708	6.91349	7.62909	7.01569	7.02349	9.09362	8.70589	9.00377	9.76678	10.2303	10.5094
sp|Q12158|SCC1_YEAST	MCD1	Sister chromatid cohesion protein 1	14	2.0276	1.90481	2.03018	2.08734	2.1503	1.94547	14.9945	15.1998	15.0395	13.2711	14.8228	14.5266
sp|P36051|MCD4_YEAST	MCD4	GPI ethanolamine phosphate transferase 1	11	6.13889	6.71613	6.70321	7.69826	8.50326	8.50289	8.88497	9.67391	9.1999	9.29131	9.1486	9.53865
sp|Q07376|MCH1_YEAST	MCH1	Probable transporter MCH1	1	14.5757	11.1671	11.0355	3.93567	3.50985	3.10831	8.71366	8.09393	12.9312	5.69989	8.2345	8.99463
sp|P21965|MCK1_YEAST	MCK1	Protein kinase MCK1	23	9.05163	8.59903	9.02239	8.86277	8.96483	8.96093	7.82971	7.54245	7.92152	7.661	7.66009	7.92365
sp|P32354|MCM10_YEAST	MCM10	Minichromosome maintenance protein 10	6	2.89463	2.94763	3.04665	5.82778	5.20796	5.01881	11.5285	12.1896	11.2335	14.2434	12.8108	13.0507
sp|Q12262|CENPH_YEAST	MCM16	Inner kinetochore subunit MCM16	1	5.79628	4.5768	5.22341	7.15577	7.22053	7.02298	10.3157	9.54388	8.79512	9.25992	12.1928	12.8968
sp|P29469|MCM2_YEAST	MCM2	DNA replication licensing factor MCM2	17	3.87883	4.01402	4.16796	7.90388	7.95223	7.86983	11.0402	10.5662	10.0897	10.4383	11.0981	10.9807
sp|Q06675|CENPO_YEAST	MCM21	Inner kinetochore subunit MCM21	1	5.73234	5.69262	6.21875	8.5443	7.88317	8.08991	10.461	8.58036	8.89185	10.4984	9.38209	10.0252
sp|P47167|CENPK_YEAST	MCM22	Inner kinetochore subunit MCM22	6	6.78341	7.74581	6.56626	7.71544	8.13491	8.97752	8.87189	10.0391	8.69867	8.36836	9.1049	8.99369
sp|P24279|MCM3_YEAST	MCM3	DNA replication licensing factor MCM3	18	3.65625	3.4681	3.54195	5.11767	5.14071	5.00677	10.5154	10.8623	10.7429	13.9388	14.4166	13.5926
sp|P30665|MCM4_YEAST	MCM4	DNA replication licensing factor MCM4	17	3.65787	3.58407	3.56404	7.74263	7.82501	7.56928	10.0747	10.2433	9.61294	12.4048	11.912	11.8094
sp|P29496|MCM5_YEAST	MCM5	Minichromosome maintenance protein 5	12	5.15137	5.26581	4.74419	6.55744	6.76095	6.67931	10.6796	10.6364	10.195	11.3152	11.1156	10.8991
sp|P53091|MCM6_YEAST	MCM6	DNA replication licensing factor MCM6	21	4.30591	4.22145	4.31814	7.84691	7.64282	7.35435	9.96054	9.80863	9.88307	11.4302	11.5249	11.703
sp|P38132|MCM7_YEAST	MCM7	DNA replication licensing factor MCM7	20	4.35472	4.30643	4.10316	7.21399	6.92994	6.59807	11.4843	11.363	11.8264	10.4649	10.4434	10.9117
sp|Q12106|MCP1_YEAST	MCP1	MDM10-complementing protein 1	1	11.2137	14.9927	14.2341	8.80926	15.6632	14.405	2.08148	3.75263	4.44681	2.54374	3.87771	3.97964
sp|Q06567|MCP2_YEAST	MCP2	ABC1 family protein MCP2	6	9.98664	10.6241	11.0921	8.52222	8.27057	8.56277	9.15826	8.81748	9.15242	5.00711	5.21321	5.59313
sp|P36060|MCR1_YEAST	MCR1	NADH-cytochrome b5 reductase 2	29	14.276	14.2683	14.2854	12.3615	11.9649	11.9697	3.86932	3.78833	4.13092	3.00117	3.0957	2.98879
sp|Q12283|FABD_YEAST	MCT1	Malonyl CoA-acyl carrier protein transacylase, mitochondrial	7	15.1095	14.4244	14.0477	8.49872	8.1677	8.68434	5.57156	6.00374	6.19243	4.47226	4.04239	4.78527
sp|P38323|CLPX_YEAST	MCX1	ATP-dependent clpX-like chaperone, mitochondrial	21	10.9864	11.1748	11.4431	7.08137	6.94459	6.90181	8.28942	8.25208	8.27719	6.94104	6.77255	6.93562
sp|P53206|MCY1_YEAST	MCY1	Putative mitochondrial cysteine synthase	12	9.37038	9.22017	9.42633	7.30082	7.59881	7.59368	8.77026	8.79147	8.32668	7.80082	7.97794	7.82264
sp|P47095|MTNB_YEAST	MDE1	Methylthioribulose-1-phosphate dehydratase	10	8.83307	8.50603	8.83932	9.27328	8.54294	8.39622	8.12488	7.95949	8.31367	7.58215	7.2909	8.33805
sp|P53885|MDG1_YEAST	MDG1	Signal transduction protein MDG1	26	15.0737	15.0946	15.6428	9.60454	10.0369	10.1441	3.9339	4.0374	4.15389	4.14078	4.09497	4.04233
sp|P17505|MDHM_YEAST	MDH1	Malate dehydrogenase, mitochondrial	42	10.2823	9.34865	10.0048	19.2591	16.8785	16.7681	2.91704	2.78111	3.32862	2.72923	2.71579	2.98668
sp|P22133|MDHC_YEAST	MDH2	Malate dehydrogenase, cytoplasmic	16	10.3222	9.9626	10.4871	21.9399	19.6817	19.8657	0.996417	0.836503	1.17149	1.67227	1.53667	1.52742
sp|P32419|MDHP_YEAST	MDH3	Malate dehydrogenase, peroxisomal	31	17.4457	16.5503	16.894	6.57078	6.54881	6.79464	5.15098	4.96744	5.19826	4.49668	4.8675	4.51487
sp|P35191|MDJ1_YEAST	MDJ1	DnaJ homolog 1, mitochondrial	23	11.2185	11.1395	11.178	10.1203	10.5077	10.688	7.23729	7.13541	7.02392	4.60371	4.55216	4.59544
sp|P42834|MDJ2_YEAST	MDJ2	Mitochondrial DnaJ homolog 2	3	10.4986	9.94165	9.79933	12.0687	11.6065	11.8547	5.68732	5.43875	5.60556	5.89451	5.73374	5.87054
sp|P33310|MDL1_YEAST	MDL1	ATP-dependent permease MDL1, mitochondrial	12	8.71878	9.31051	9.27301	8.49906	8.4866	8.86478	7.89777	7.92823	7.67904	7.98858	7.58651	7.76714
sp|P33311|MDL2_YEAST	MDL2	ATP-dependent permease MDL2, mitochondrial	13	9.15975	9.71142	9.91813	12.5395	12.7373	13.168	5.25493	5.34484	5.23432	5.83293	5.63959	5.4593
sp|Q01846|MDM1_YEAST	MDM1	Structural protein MDM1	2	7.75712	9.24792	8.48912	6.91261	7.46027	7.24748	9.47173	10.8001	8.88164	7.58051	8.13431	8.01718
sp|P18409|MDM10_YEAST	MDM10	Mitochondrial distribution and morphology protein 10	6	13.421	12.53	13.9238	6.92718	7.27672	7.13082	7.63619	7.07733	6.15038	5.8168	5.85972	6.25014
sp|Q92328|MDM12_YEAST	MDM12	Mitochondrial distribution and morphology protein 12	3	10.3669	9.97966	10.2426	8.40262	9.22075	8.08969	8.14178	7.49688	8.60601	6.43312	6.69689	6.32303
sp|Q12387|NAA25_YEAST	MDM20	N-terminal acetyltransferase B complex subunit MDM20	24	5.61942	5.57083	5.84926	8.13428	8.61029	8.4392	8.64758	8.34533	8.17762	10.7064	11.0555	10.8442
sp|P38880|MDM31_YEAST	MDM31	Mitochondrial distribution and morphology protein 31	1	10.26	9.96954	12.037	9.6183	9.88988	9.96692	7.09832	5.28231	10.4993	4.3216	5.49024	5.56655
sp|Q12171|MDM32_YEAST	MDM32	Mitochondrial distribution and morphology protein 32	4	9.3296	9.26495	8.89672	6.67439	6.87317	6.46449	9.20157	9.30928	8.83583	8.58542	8.38244	8.18214
sp|P53083|MDM34_YEAST	MDM34	Mitochondrial distribution and morphology protein 34	2	8.33879	10.5311	9.41927	7.16805	8.70454	5.70656	9.72	11.9018	9.13053	6.48754	5.57903	7.31283
sp|O60200|MDM35_YEAST	MDM35	Mitochondrial distribution and morphology protein 35	1	12.471	10.3939	9.57883	12.6852	8.33712	8.12384	8.13336	9.17173	6.73903	5.00736	4.21605	5.14262
sp|Q06820|MDM36_YEAST	MDM36	Mitochondrial distribution and morphology protein 36	2	9.404	8.84791	9.65339	10.0968	7.94834	10.1915	8.3466	7.43819	8.06588	6.33001	7.26307	6.4143
sp|Q08179|MDM38_YEAST	MDM38	Mitochondrial distribution and morphology protein 38	30	8.42203	8.4598	8.66411	10.09	9.59286	10.0954	8.21553	7.77708	8.16095	6.69636	6.86314	6.96279
sp|Q12019|MDN1_YEAST	MDN1	Midasin	38	5.10506	5.49429	5.41174	5.85197	6.056	5.88243	9.0846	9.11888	8.66249	13.598	12.8986	12.836
sp|P53258|GYP2_YEAST	MDR1	GTPase-activating protein GYP2	18	11.7026	12.7442	12.8337	9.47526	9.33772	10.2415	5.62228	5.84463	5.74064	5.66226	5.51438	5.28086
sp|P53094|MDS3_YEAST	MDS3	Negative regulator of sporulation MDS3	15	9.44624	9.34259	9.63098	10.4733	10.1095	10.2423	6.39464	6.15327	6.49256	7.17982	7.33248	7.20232
sp|P47025|MDV1_YEAST	MDV1	Mitochondrial division protein 1	15	8.10993	8.20774	7.98048	8.82715	11.34	9.233	8.10708	8.06981	8.05465	7.38088	7.34911	7.34015
sp|Q12285|MDY2_YEAST	MDY2	Ubiquitin-like protein MDY2	11	4.90658	4.90068	4.73636	8.24339	7.9592	7.73689	8.33744	8.57003	8.66407	11.8928	11.9574	12.0951
sp|P38111|ATR_YEAST	MEC1	Serine/threonine-protein kinase MEC1	4	7.30505	7.00075	7.35628	7.86979	9.6045	9.34949	8.54727	8.26878	8.7969	8.62147	8.72697	8.55277
sp|Q12321|MED1_YEAST	MED1	Mediator of RNA polymerase II transcription subunit 1	7	8.79849	8.86063	8.99558	9.79595	8.39785	8.87084	8.1695	7.63803	8.55216	6.75861	7.65344	7.50893
sp|Q99278|MED11_YEAST	MED11	Mediator of RNA polymerase II transcription subunit 11	4	6.97231	6.80725	6.94243	6.61919	6.30429	6.33398	10.1513	10.0429	8.91118	10.2284	10.823	9.86376
sp|Q12124|MED2_YEAST	MED2	Mediator of RNA polymerase II transcription subunit 2	4	6.64844	6.05612	6.50606	6.49465	5.87352	6.03148	10.655	9.80291	11.0012	9.56746	10.4395	10.9236
sp|Q12343|MED4_YEAST	MED4	Mediator of RNA polymerase II transcription subunit 4	7	6.09113	5.83575	5.70577	6.18943	5.98211	6.10633	11.2477	10.8639	10.9304	10.2553	10.2805	10.5117
sp|P38782|MED6_YEAST	MED6	Mediator of RNA polymerase II transcription subunit 6	8	6.37767	6.3088	5.83346	7.77709	7.38092	7.13167	9.5602	9.31926	10.358	9.45499	10.3547	10.1432
sp|Q08278|MED7_YEAST	MED7	Mediator of RNA polymerase II transcription subunit 7	2	6.30612	5.97689	5.98425	4.713	4.92962	4.92023	12.3397	11.4432	11.8303	10.7742	10.6794	10.103
sp|P38304|MED8_YEAST	MED8	Mediator of RNA polymerase II transcription subunit 8	3	9.04806	10.5271	9.36088	8.0185	9.3246	8.99708	6.93492	7.92506	8.52565	6.82549	6.98002	7.53264
sp|P25039|EFGM_YEAST	MEF1	Elongation factor G, mitochondrial	22	11.6669	11.6057	11.4341	8.74923	8.90001	8.96843	8.23179	8.57379	8.45052	4.45675	4.45315	4.50958
sp|P39677|RRF2M_YEAST	MEF2	Ribosome-releasing factor 2, mitochondrial	16	13.3065	13.5851	14.0475	8.55267	8.70222	8.46761	7.01679	6.81341	7.13455	4.04205	4.14705	4.18453
sp|Q02205|MEH1_YEAST	MEH1	Protein MEH1	4	12.1451	11.3463	12.4257	8.83526	8.68211	7.19138	6.13504	8.21234	6.57764	6.77092	5.73557	5.94258
sp|P40260|MEP1_YEAST	MEP1	Ammonium transporter MEP1	1	1.01206	1.02075	1.89982	26.2092	26.5902	26.0822	0	0	0.166423	6.30596	5.42971	5.28376
sp|P41948|MEP2_YEAST	MEP2	Ammonium transporter MEP2	1	3.39007	3.28283	3.34119	15.845	15.7953	17.2702	9.52889	9.25264	9.65821	4.56555	3.8752	4.19484
sp|P00958|SYMC_YEAST	MES1	Methionine--tRNA ligase, cytoplasmic	38	4.27487	4.09676	4.25811	6.21615	6.37868	6.01799	10.3076	10.266	9.88229	12.8456	12.9358	12.5201
sp|P36150|SUMT_YEAST	MET1	Uroporphyrinogen-III C-methyltransferase	5	19.1561	19.5219	19.3761	2.77281	2.22855	2.72875	8.10623	8.36662	8.21894	3.23423	2.86478	3.42502
sp|P39692|MET10_YEAST	MET10	Sulfite reductase [NADPH] flavoprotein component	16	15.5777	16.1248	16.0416	2.79542	3.07911	3.3805	9.14811	9.19168	8.91741	5.44921	5.2665	5.02794
sp|P46151|MTHR1_YEAST	MET12	Methylenetetrahydrofolate reductase 1	19	9.80811	9.62089	10.1588	8.27648	8.13017	8.11139	7.95018	8.13759	7.77772	7.3903	7.30092	7.33741
sp|P53128|MTHR2_YEAST	MET13	Methylenetetrahydrofolate reductase 2	7	10.9216	11.1721	11.539	10.1727	10.2291	9.69031	8.10285	8.43933	7.76311	3.86016	4.12092	3.98878
sp|Q02196|KAPS_YEAST	MET14	Adenylyl-sulfate kinase	6	23.3835	22.7852	23.2412	1.50124	1.05254	1.90238	6.2437	5.82127	5.66608	2.74611	2.84509	2.81166
sp|P18408|MET16_YEAST	MET16	Phosphoadenosine phosphosulfate reductase	1	15.6113	14.8987	15.6718	1.4318	1.43695	1.37076	14.6852	12.8412	13.6062	2.43002	3.75826	2.25782
sp|P06106|CYSD_YEAST	MET17	Homocysteine/cysteine synthase	35	18.7334	18.4619	18.6675	2.24445	2.14597	2.62897	8.48915	8.36571	8.78001	3.70694	3.79057	3.98535
sp|P40469|MET18_YEAST	MET18	DNA repair/transcription protein MET18/MMS19	24	8.21148	8.7698	8.48224	7.92641	7.92834	8.28776	9.33486	9.27656	9.10565	7.64946	7.41073	7.61671
sp|P08465|MET2_YEAST	MET2	Homoserine O-acetyltransferase	10	22.5205	23.1657	23.2368	1.39541	1.43669	1.97113	6.0652	6.46752	6.30671	2.62072	2.41308	2.40046
sp|P32179|MET22_YEAST	MET22	3'(2'),5'-bisphosphate nucleotidase	13	14.2346	14.5145	14.6109	3.75838	3.4329	3.74964	8.85152	9.00334	8.84768	6.25373	7.05969	5.68304
sp|P08536|MET3_YEAST	MET3	Sulfate adenylyltransferase	19	25.4116	25.5329	25.8051	2.44996	2.49325	2.9254	3.50113	3.49679	3.79572	1.5649	1.55054	1.47278
sp|P39014|MET30_YEAST	MET30	F-box protein MET30	3	9.83658	7.56047	10.0299	7.42627	6.66349	8.65637	7.98926	7.9186	8.85847	8.2517	7.63222	9.17666
sp|Q03081|MET31_YEAST	MET31	Transcriptional regulator MET31	2	6.80147	7.79561	8.10687	7.23233	9.55457	7.82629	10.2651	11.5407	8.70945	12.8039	6.29643	3.06731
sp|P32389|MET4_YEAST	MET4	Transcriptional activator of sulfur metabolism MET4	5	3.76247	3.69478	3.93092	3.73505	3.34717	3.56526	13.259	13.0003	13.4299	12.8871	12.9537	12.4342
sp|P47169|MET5_YEAST	MET5	Sulfite reductase [NADPH] subunit beta	35	19.5395	19.4273	19.3783	4.35329	4.02732	4.45408	6.46036	6.10484	6.51918	3.1853	3.20118	3.3493
sp|P05694|METE_YEAST	MET6	5-methyltetrahydropteroyltriglutamate--homocysteine methyltransferase	38	9.84935	9.25503	9.6197	8.39016	8.24278	8.2081	8.72791	8.53452	8.96408	6.65055	6.80816	6.74966
sp|Q08645|FOLE_YEAST	MET7	Folylpolyglutamate synthase	14	7.41381	7.36816	7.89026	8.06056	7.40263	7.55116	9.13119	9.01112	10.0806	8.36799	8.46923	9.25328
sp|P15807|MET8_YEAST	MET8	Siroheme biosynthesis protein MET8	3	10.9007	9.83407	10.9752	4.81707	5.18941	5.17255	10.1951	9.12073	10.5988	8.20842	7.2963	7.69173
sp|Q07938|MTAP_YEAST	MEU1	S-methyl-5'-thioadenosine phosphorylase	18	3.85522	3.81315	3.88638	6.27106	5.76276	5.99869	11.469	11.1132	11.5496	11.5749	12.1681	12.5378
sp|Q99257|MEX67_YEAST	MEX67	mRNA export factor MEX67	12	7.48218	7.11905	6.83957	6.82329	6.80078	6.90812	9.8011	9.90791	9.98952	9.43203	9.31732	9.57912
sp|P01149|MFAL1_YEAST	MF(ALPHA)1	Mating factor alpha-1	1	0.779578	1.29437	0.865119	8.15973	8.58965	7.19762	1.08708	0.204294	0	22.1468	27.607	22.0688
sp|P32435|MFAL2_YEAST	MF(ALPHA)2	Mating factor alpha-2	1	4.98269	5.14302	6.30399	5.44316	3.87535	5.69497	3.59237	4.00628	3.36403	18.658	21.1106	17.8255
sp|Q04922|MFB1_YEAST	MFB1	Mitochondrial F-box protein MFB1	5	10.2156	9.65149	10.3886	5.25767	4.2364	4.7633	12.1037	11.2149	12.7103	6.18946	5.93119	7.33741
sp|P33441|MFT1_YEAST	MFT1	THO complex subunit MFT1	8	5.70341	6.08899	6.20458	5.91291	5.91793	5.71142	10.4671	11.0985	10.769	10.5509	10.8017	10.7734
sp|P40578|MGA2_YEAST	MGA2	Protein MGA2	2	2.92095	2.94845	3.00826	3.22028	3.577	3.53264	13.1918	12.7939	12.3377	15.0867	13.8202	13.562
sp|P38523|GRPE_YEAST	MGE1	GrpE protein homolog, mitochondrial	24	7.63183	7.29187	7.40688	7.4823	7.01242	6.62064	9.83201	9.41469	10.2109	8.70624	8.98827	9.40193
sp|P32266|MGM1_YEAST	MGM1	Dynamin-like GTPase MGM1, mitochondrial	16	10.1091	10.0433	10.0129	9.65201	9.61285	9.54848	7.1257	7.2765	7.48431	6.2696	6.31199	6.55329
sp|P32787|MG101_YEAST	MGM101	Mitochondrial genome maintenance protein MGM101	16	7.59713	7.36838	7.73956	11.9083	11.5505	11.5014	6.97112	6.71794	7.08604	7.17295	7.22006	7.16657
sp|P25573|MGR1_YEAST	MGR1	Mitochondrial inner membrane i-AAA protease supercomplex subunit MGR1	10	12.8376	12.6927	12.7376	7.65991	7.76966	7.77056	6.9972	6.36267	6.81553	6.21075	6.12555	6.02033
sp|Q04472|MGR3_YEAST	MGR3	Mitochondrial inner membrane i-AAA protease supercomplex subunit MGR3	12	10.9632	11.2218	11.2378	7.80278	8.07579	8.11551	7.59128	7.83267	7.12285	6.75478	6.88693	6.39451
sp|P40151|WRIP1_YEAST	MGS1	DNA-dependent ATPase MGS1	4	7.05045	6.65633	7.14719	6.82813	6.21361	6.57559	9.8711	9.82882	10.3229	9.95766	9.3982	10.15
sp|P47085|MHO1_YEAST	MHO1	MEMO1 family protein MHO1	8	16.5147	16.0455	16.7446	14.2488	13.1373	13.0947	2.44315	2.04955	2.63687	1.0565	0.901629	1.12679
sp|P43638|MHP1_YEAST	MHP1	MAP-homologous protein 1	28	8.53282	8.55175	8.53076	10.9241	11.2413	10.9939	5.67065	5.58458	5.99985	7.99838	8.08539	7.88647
sp|Q06630|MHR1_YEAST	MHR1	Mitochondrial homologous recombination protein 1	6	9.29696	9.32974	9.44808	7.54178	7.63754	7.5324	10.1069	10.2053	10.5044	5.96279	6.0126	6.42158
sp|Q12525|MHT1_YEAST	MHT1	Homocysteine S-methyltransferase 1	6	10.1614	9.57354	9.91366	4.81719	4.56129	4.9277	10.7719	10.1252	11.2595	7.30202	7.95212	8.63451
sp|P36046|MIA40_YEAST	MIA40	Mitochondrial intermembrane space import and assembly protein 40	19	10.5715	11.3797	11.0733	9.02646	9.24024	9.55217	7.21499	7.69019	8.10067	5.63757	5.29081	5.22236
sp|Q96VH5|MIC10_YEAST	MIC10	MICOS complex subunit MIC10	9	10.8509	11.3043	11.5255	12.0212	12.2427	12.9794	5.57439	5.59358	5.98631	3.90921	3.80133	4.21122
sp|P38341|MIC12_YEAST	MIC12	MICOS complex subunit MIC12	6	11.2998	12.2645	12.2835	9.46099	10.1488	10.16	6.48432	6.61773	6.95081	4.85353	4.58542	4.89058
sp|P43594|MIC19_YEAST	MIC19	MICOS complex subunit MIC19	9	10.6129	10.7202	11.1279	8.53788	8.59253	8.92221	8.07589	8.25508	7.70447	5.8811	5.69885	5.87094
sp|P50087|MIC26_YEAST	MIC26	MICOS subunit MIC26	8	10.1104	10.7723	10.5995	9.47219	9.59476	9.80985	7.18356	7.08819	7.60995	6.36202	5.97873	5.41856
sp|P50945|MIC27_YEAST	MIC27	MICOS complex subunit MIC27	11	12.783	12.7248	13.1407	9.88352	10.1619	10.3518	6.15129	5.91265	6.57335	3.97246	4.0711	4.27336
sp|P36112|MIC60_YEAST	MIC60	MICOS complex subunit MIC60	21	11.9356	11.4349	11.8431	10.9447	10.7143	11.2878	6.62154	6.38026	6.73862	4.0872	3.92475	4.08722
sp|P35201|CENPC_YEAST	MIF2	Inner kinetochore subunit MIF2	2	3.01124	2.69056	2.37937	4.14331	4.28123	5.42112	12.4141	11.4984	11.5046	14.8874	13.9699	13.7987
sp|P27705|MIG1_YEAST	MIG1	Regulatory protein MIG1	5	8.97068	9.1249	9.04168	6.99497	7.66425	7.16621	8.54578	8.52798	8.08672	8.56662	8.42784	8.88237
sp|P53035|MIG2_YEAST	MIG2	Regulatory protein MIG2	1	1.74392	2.51134	0.856804	0.824973	0	2.11912	12.7293	14.6246	13.88	18.6943	14.2651	17.7505
sp|P23748|MPIP_YEAST	MIH1	M-phase inducer phosphatase	1	6.22231	5.88056	4.96769	9.84627	9.63619	9.14941	8.77551	8.2491	7.99425	8.84232	10.2098	10.2266
sp|P43564|MIL1_YEAST	MIL1	Probable lipase MIL1	10	6.90455	7.28449	7.43625	9.37999	9.49688	9.47641	7.95217	7.60166	7.56416	8.94796	9.27896	8.67653
sp|Q08176|MIM1_YEAST	MIM1	Mitochondrial import protein 1	2	7.78249	7.45916	7.29689	11.591	10.3589	11.6078	6.47337	6.87582	6.47242	8.23231	7.64731	8.20253
sp|P15801|DPOG_YEAST	MIP1	DNA polymerase gamma	4	2.72085	2.86533	3.05771	8.91345	8.53877	8.90626	9.62606	9.41553	8.9627	12.3706	12.5221	12.1007
sp|P38760|MIP6_YEAST	MIP6	RNA-binding protein MIP6	1	4.66162	4.16461	4.03678	1.24176	2.03661	2.48955	19.4069	19.2365	16.6701	8.33861	9.53609	8.18078
sp|P23641|MPCP_YEAST	MIR1	Mitochondrial phosphate carrier protein	35	11.2201	11.0941	10.999	13.5292	13.8138	14.0693	4.80957	4.93411	4.88378	3.55763	3.45857	3.63089
sp|P09440|C1TM_YEAST	MIS1	C-1-tetrahydrofolate synthase, mitochondrial	31	4.76966	4.65186	4.76553	8.18156	7.02688	7.16023	10.0853	9.13476	10.8117	10.7781	10.9738	11.6605
sp|P40002|MIT1_YEAST	MIT1	Transcriptional regulator MIT1	6	5.7096	5.46539	5.35979	8.83882	8.53019	9.0526	8.95008	8.76014	8.29127	9.99512	10.0872	10.9598
sp|Q03667|MIX17_YEAST	MIX17	Mitochondrial intermembrane space cysteine motif-containing protein MIX17	2	2.40313	1.80414	1.98924	4.41314	4.40485	4.33701	12.4536	11.9106	15.4064	10.9017	12.9868	16.9893
sp|P38162|MIX23_YEAST	MIX23	Mitochondrial intermembrane space cysteine motif-containing protein MIX23	2	11.2321	10.1659	10.9859	9.2472	7.9847	9.31589	7.63075	8.15751	8.78411	5.98343	5.23162	5.28088
sp|P53379|MKC7_YEAST	MKC7	Aspartic proteinase MKC7	8	3.66105	3.78075	3.64703	4.80075	4.71493	4.65589	13.4926	13.2938	12.4796	11.2739	11.8916	12.308
sp|P32490|MKK1_YEAST	MKK1	MAP kinase kinase MKK1/SSP32	5	5.83256	4.72741	5.77991	5.7804	5.999	6.12038	11.5004	11.4318	10.9258	10.1876	10.6999	11.0148
sp|P32491|MKK2_YEAST	MKK2	MAP kinase kinase MKK2/SSP33	3	9.38519	9.94866	7.89888	7.25235	7.80994	6.93251	9.39105	9.35881	9.071	7.14791	7.50844	8.29527
sp|P34072|MKS1_YEAST	MKS1	Negative regulator of RAS-cAMP pathway	7	8.03149	7.97891	7.7847	8.34744	8.45041	8.14706	8.88853	8.43079	9.26024	7.98017	8.23213	8.46813
sp|P40850|MKT1_YEAST	MKT1	Post-transcriptional regulator MKT1	18	11.9869	12.1571	11.916	1.25505	1.36871	1.47976	13.5649	13.3593	13.6712	6.26586	6.42343	6.55181
sp|P53141|MLC1_YEAST	MLC1	Myosin light chain 1	17	5.07652	4.04838	4.19287	9.1484	8.3622	6.58008	8.38396	13.8071	6.30893	13.8832	9.12658	11.0818
sp|Q06580|MLC2_YEAST	MLC2	Myosin light chain 2	1	3.43553	3.83646	3.2855	10.2406	8.70049	5.79599	7.28042	12.1861	7.40353	17.7997	9.55356	10.4821
sp|P32047|MLF3_YEAST	MLF3	Protein MLF3	7	2.43306	2.19962	2.3687	4.36772	4.4373	4.11162	13.1668	12.7719	12.5771	13.7282	13.8038	14.0342
sp|P38920|MLH1_YEAST	MLH1	DNA mismatch repair protein MLH1	6	6.00089	5.47878	5.80115	9.63716	9.57612	9.24514	8.92833	8.46577	9.78852	9.17459	8.99867	8.90487
sp|Q02455|MLP1_YEAST	MLP1	Protein MLP1	38	6.60019	6.5239	6.49348	6.27041	6.33192	6.41146	8.91374	9.29462	8.69567	11.5729	11.5482	11.3435
sp|P40457|MLP2_YEAST	MLP2	Protein MLP2	24	7.06353	7.08924	7.41061	6.433	6.7228	6.25253	9.48777	9.20276	9.30893	10.5295	10.4612	10.0381
sp|P30952|MLS1_YEAST	MLS1	Malate synthase 1	40	13.9263	13.8975	13.4638	15.8539	14.0693	15.9738	2.72812	2.6041	3.03718	1.53307	1.42985	1.4831
sp|Q03829|MME1_YEAST	MME1	Mitochondrial magnesium exporter 1	2	6.68123	6.85744	8.1073	10.0656	8.98903	7.83329	12.1335	11.2864	10.9868	6.02925	5.70379	5.32641
sp|P40185|MMF1_YEAST	MMF1	Protein MMF1, mitochondrial	30	8.13731	7.21715	7.188	8.52498	8.66462	8.21432	6.20311	6.2947	5.88533	10.9695	11.3427	11.3583
sp|P41800|MMM1_YEAST	MMM1	Maintenance of mitochondrial morphology protein 1	6	9.16129	9.30308	9.35875	9.30646	9.64225	9.60341	7.60035	7.77671	7.67289	6.81106	6.73435	7.02939
sp|Q12372|MMP1_YEAST	MMP1	S-methylmethionine permease 1	2	15.3502	16.6286	16.3868	1.29487	1.4305	1.89069	7.57596	8.25858	7.72458	7.4754	8.29043	7.69349
sp|Q06324|MMR1_YEAST	MMR1	Mitochondrial MYO2 receptor-related protein 1	4	9.71037	9.9392	10.2371	3.77194	3.93539	4.05943	10.3886	10.1577	10.247	8.65125	8.74262	10.1594
sp|Q06211|MMS1_YEAST	MMS1	E3 ubiquitin-protein ligase linker protein MMS1	3	7.07755	7.9413	7.18009	6.50096	7.71858	7.58297	9.96573	9.01116	8.87082	9.53859	9.45378	9.15847
sp|P53152|MMS2_YEAST	MMS2	Ubiquitin-conjugating enzyme variant MMS2	1	9.34729	9.33625	12.0729	11.78	9.67592	10.5576	5.71217	6.76713	6.18548	5.62766	6.31024	6.62739
sp|Q03218|MMT1_YEAST	MMT1	Mitochondrial metal transporter 1	4	9.45132	9.02952	9.09329	6.60092	6.8298	6.61099	9.59919	9.73852	9.61684	8.10291	7.73544	7.59127
sp|Q08970|MMT2_YEAST	MMT2	Mitochondrial metal transporter 2	6	7.61972	8.661	8.36822	13.1171	14.4694	14.1675	5.65123	5.3032	5.2	5.76819	5.81407	5.86024
sp|P24720|MNE1_YEAST	MNE1	Protein MNE1	3	9.4826	9.49626	11.0594	9.0695	9.21419	8.96853	8.59654	7.40094	8.11024	5.85382	6.29769	6.45024
sp|Q12205|MNL2_YEAST	MNL2	Putative endoplasmic reticulum mannosidase MNL2	15	8.14663	8.61183	8.88024	6.58764	6.83286	6.3893	10.3231	10.33	10.1552	7.77449	7.86128	8.10734
sp|P39106|MNN1_YEAST	MNN1	Alpha-1,3-mannosyltransferase MNN1	20	1.54732	1.54394	1.57404	5.20017	5.26117	4.81987	13.4445	13.7963	13.298	13.467	13.3456	12.7021
sp|P50108|MNN10_YEAST	MNN10	Probable alpha-1,6-mannosyltransferase MNN10	15	6.34454	6.73974	6.84616	5.68762	5.9166	5.60934	13.2008	12.9433	12.483	8.12377	7.92593	8.17916
sp|P46985|MNN11_YEAST	MNN11	Probable alpha-1,6-mannosyltransferase MNN11	15	7.11929	6.9062	7.30876	6.70558	6.79151	6.69973	10.0601	9.99567	10.0636	9.28569	9.58883	9.47499
sp|P38069|MNN2_YEAST	MNN2	Alpha-1,2-mannosyltransferase MNN2	20	6.7375	6.66088	6.82538	9.40354	9.65642	9.9105	9.14632	8.9672	8.73703	8.23757	7.94214	7.77554
sp|P36044|MNN4_YEAST	MNN4	Protein MNN4	8	16.8536	16.478	16.5046	4.54885	4.33378	4.64073	6.22717	6.81438	6.65283	5.73409	5.69859	5.51338
sp|P46982|MNN5_YEAST	MNN5	Alpha-1,2-mannosyltransferase MNN5	16	5.05437	5.72844	5.82856	5.50545	5.9305	6.18727	10.6198	10.4635	9.71933	11.8331	11.6626	11.467
sp|P39107|MNN9_YEAST	MNN9	Mannan polymerase complexes subunit MNN9	14	7.651	7.23779	7.97435	8.81505	8.42226	8.38546	9.28144	8.82071	9.59284	7.39558	8.17282	8.25071
sp|P53163|MNP1_YEAST	MNP1	54S ribosomal protein L12, mitochondrial	8	9.4986	9.28859	9.02952	7.6021	7.64418	7.73161	9.9689	9.7787	9.82324	6.66106	6.29908	6.67443
sp|P35724|MNR2_YEAST	MNR2	Manganese resistance protein MNR2	13	11.9771	12.4005	12.5384	6.08309	6.78404	6.81869	7.88182	8.1119	7.838	6.76333	6.32017	6.48296
sp|P32906|MNS1_YEAST	MNS1	Endoplasmic reticulum mannosyl-oligosaccharide 1,2-alpha-mannosidase	3	7.38706	6.61693	6.81307	13.919	13.4047	13.1643	5.80775	5.43316	6.12009	7.69079	6.69652	6.94662
sp|P53059|MNT2_YEAST	MNT2	Alpha-1,3-mannosyltransferase MNT2	1	3.57498	3.42566	3.09758	5.28493	5.52494	5.44341	11.8473	12.6437	11.4316	13.1631	12.1122	12.4506
sp|P40549|MNT3_YEAST	MNT3	Alpha-1,3-mannosyltransferase MNT3	12	8.90929	9.54782	9.22772	9.55427	10.2166	9.734	7.74018	7.80369	7.96197	6.53256	6.29094	6.48093
sp|P40484|MOB1_YEAST	MOB1	DBF2 kinase activator protein MOB1	8	5.773	6.18241	6.16247	6.59261	6.38147	6.28646	10.7888	10.1654	10.4088	10.4405	10.723	10.0951
sp|P43563|MOB2_YEAST	MOB2	CBK1 kinase activator protein MOB2	4	6.76128	5.61741	6.5719	7.15161	6.25156	6.16877	10.984	9.80289	9.92249	9.8077	10.7354	10.2249
sp|P47123|MOG1_YEAST	MOG1	Nuclear import protein MOG1	6	8.99734	8.48272	8.79602	14.0228	13.8389	13.729	5.51653	5.18092	5.29875	5.52231	5.44821	5.16655
sp|P38191|MOH1_YEAST	MOH1	Protein yippee-like MOH1	6	21.0038	22.0231	21.9604	9.56039	10.0727	9.82631	1.08955	0.875913	0.873927	0.916213	0.818939	0.97863
sp|P53129|MON1_YEAST	MON1	Vacuolar fusion protein MON1	2	8.21579	8.14387	8.93766	8.39377	8.92346	8.50336	7.93942	7.40435	7.84436	8.64566	8.57325	8.47505
sp|P48563|MON2_YEAST	MON2	Protein MON2	31	9.37589	9.83114	10.5349	8.40141	8.46678	8.621	6.98973	6.88585	6.7444	8.11236	8.14968	7.88682
sp|P32333|MOT1_YEAST	MOT1	TATA-binding protein-associated factor MOT1	23	5.4746	5.71533	5.59747	6.49647	6.73179	6.56023	9.66725	9.55059	9.21574	11.6938	11.6198	11.6769
sp|P34909|NOT4_YEAST	MOT2	General negative regulator of transcription subunit 4	9	7.7054	7.26945	7.40042	7.07693	7.25044	6.78623	10.0545	9.7187	9.51229	9.00605	9.04278	9.17677
sp|P54785|MOT3_YEAST	MOT3	Transcriptional activator/repressor MOT3	1	6.8497	7.08085	7.29973	5.87058	6.82036	5.83348	10.7459	11.1984	10.2146	9.55504	9.80378	8.72757
sp|P53583|MPA43_YEAST	MPA43	Protein MPA43	3	6.40286	7.27631	7.50306	8.04318	7.89513	7.69548	9.036	8.96852	9.15982	8.39797	10.177	9.44473
sp|P53157|MPC1_YEAST	MPC1	Mitochondrial pyruvate carrier 1	3	16.5529	16.8959	16.7817	6.56811	7.4541	7.83219	5.34434	5.71669	4.98349	3.89776	3.94139	4.03133
sp|P38857|MPC2_YEAST	MPC2	Mitochondrial pyruvate carrier 2	2	8.1375	9.34137	10.2377	9.64459	9.92268	8.69923	7.33186	7.4015	7.22807	7.86507	6.97228	7.21813
sp|P53311|MPC3_YEAST	MPC3	Mitochondrial pyruvate carrier 3	5	21.3985	24.2164	20.2172	9.84012	10.7917	11.1808	0.17533	0.154516	0.429837	0.62993	0.532849	0.432823
sp|Q12404|MPD1_YEAST	MPD1	Protein disulfide-isomerase MPD1	9	8.37617	8.50559	8.13987	11.6771	11.1804	10.9106	7.54172	6.8686	7.66529	6.30661	5.95743	6.87053
sp|Q99316|MPD2_YEAST	MPD2	Protein disulfide isomerase MPD2	12	9.06577	9.13488	9.21299	10.9958	10.9104	10.7872	6.33543	6.68006	6.8793	6.68697	6.79233	6.51887
sp|P35728|MPE1_YEAST	MPE1	Protein MPE1	5	7.02905	6.44406	5.6079	6.60388	6.73882	7.71757	8.92596	8.82267	9.91867	10.4561	10.4339	11.3015
sp|P40562|MPH1_YEAST	MPH1	ATP-dependent DNA helicase MPH1	6	6.88533	7.13596	6.88694	7.07616	7.45801	7.62135	10.6013	10.0068	9.74132	9.56367	8.96667	8.05643
sp|P40364|MPM1_YEAST	MPM1	Mitochondrial peculiar membrane protein 1	16	19.4606	18.0065	18.4807	8.60483	8.82001	9.04723	3.79204	3.71955	4.06031	1.92052	2.04714	2.04047
sp|P25338|MPO1_YEAST	MPO1	2-hydroxy-palmitic acid dioxygenase MPO1	2	12.5585	13.2951	13.9704	8.29073	8.73936	9.58962	5.4509	5.16543	5.62748	5.7395	6.09885	5.47417
sp|P47083|MPP10_YEAST	MPP10	U3 small nucleolar RNA-associated protein MPP10	21	4.85818	4.9514	4.87747	4.70549	5.05047	4.78031	11.6283	11.4765	11.1936	12.4037	12.2053	11.8693
sp|P53725|MPP6_YEAST	MPP6	M-phase phosphoprotein 6 homolog	5	5.65796	5.99363	5.47736	7.11332	6.78755	6.9678	10.178	10.5565	10.77	10.4233	9.89594	10.1787
sp|P53159|MPS2_YEAST	MPS2	Monopolar spindle protein 2	3	7.89692	8.50187	7.96113	8.17726	8.72182	9.35181	7.42028	7.23262	7.03566	9.59695	9.34923	8.75446
sp|P47069|MPS3_YEAST	MPS3	Spindle pole body assembly component MPS3	6	5.91386	6.43442	6.39148	8.03851	9.16831	8.17992	8.80952	9.24302	8.63112	9.41822	10.3293	9.44235
sp|P39016|MPT5_YEAST	MPT5	Suppressor protein MPT5	8	7.92978	8.32141	7.83811	9.46228	9.38599	9.51705	8.44332	8.67261	8.70363	6.98875	7.44265	7.29442
sp|P25588|MRC1_YEAST	MRC1	Mediator of replication checkpoint protein 1	13	3.21327	3.45727	3.18011	4.74563	4.57175	4.8496	12.2105	12.5462	11.4148	13.5128	13.171	13.1272
sp|Q06106|MRD1_YEAST	MRD1	Multiple RNA-binding domain-containing protein 1	23	2.2793	2.5945	2.28692	2.65687	2.67126	2.6185	14.1763	14.2363	13.3444	14.7448	14.3633	14.0276
sp|P32829|MRE11_YEAST	MRE11	Double-strand break repair protein MRE11	7	6.97932	6.88653	7.44649	8.98113	8.13029	7.72034	9.38137	8.87575	9.18792	8.39368	8.71764	9.29952
sp|P30775|RF1M_YEAST	MRF1	Peptide chain release factor 1, mitochondrial	6	10.5255	11.2476	11.0537	8.23829	7.78396	7.85746	9.64724	9.10715	8.94438	5.1786	5.26066	5.15548
sp|Q12117|MRH1_YEAST	MRH1	Protein MRH1	10	8.57594	7.38606	8.66544	8.30309	8.26426	8.23708	7.93878	6.71242	7.74297	9.25185	9.4098	9.51231
sp|P53166|MRH4_YEAST	MRH4	ATP-dependent RNA helicase MRH4, mitochondrial	14	6.9523	6.55605	7.01222	10.1649	10.1158	10.4714	9.66662	9.05309	9.93589	6.59465	6.4227	7.05441
sp|Q06489|MTNA_YEAST	MRI1	Methylthioribose-1-phosphate isomerase	17	5.46287	5.4986	5.40837	4.21947	4.34702	4.21342	11.1278	11.3639	10.7039	12.4856	12.7492	12.4199
sp|P50873|MRK1_YEAST	MRK1	Serine/threonine-protein kinase MRK1	1	15.2823	16.2714	15.4087	12.7463	12.1333	14.3177	1.14102	3.35858	3.14013	1.76867	2.20392	2.2281
sp|Q06815|MRL1_YEAST	MRL1	Mannose 6-phosphate receptor-like protein 1	3	8.26122	8.67185	7.57759	6.73695	7.15537	7.00167	9.01446	8.62634	9.00014	8.68478	9.62264	9.64698
sp|P25270|MRM1_YEAST	MRM1	rRNA methyltransferase 1, mitochondrial	4	7.34468	7.33338	7.39038	7.39748	8.15854	8.11992	10.4269	11.5377	9.17082	8.639	6.75837	7.72281
sp|P53123|MRM2_YEAST	MRM2	rRNA methyltransferase 2, mitochondrial	3	10.4334	9.56983	9.80667	9.69776	9.20914	9.82201	7.42501	6.98369	7.88693	5.82723	6.64923	6.68916
sp|Q08925|MRN1_YEAST	MRN1	RNA-binding protein MRN1	18	5.93668	5.89232	5.85285	7.094	7.18864	7.28692	9.23857	9.14399	8.91643	10.8774	11.2847	11.2875
sp|P10662|RT01_YEAST	MRP1	37S ribosomal protein MRP1, mitochondrial	21	9.68146	9.3201	9.37601	7.28657	7.29693	7.56748	10.0677	10.1787	10.2615	6.19529	6.22363	6.54464
sp|O75012|MRP10_YEAST	MRP10	37S ribosomal protein MRP10, mitochondrial	1	9.30612	6.7886	7.68828	5.97822	4.83088	4.5398	13.1095	11.1225	14.3048	5.00975	7.99232	9.32928
sp|P12686|RT13_YEAST	MRP13	37S ribosomal protein MRP13, mitochondrial	9	9.04772	9.51677	9.30416	8.26726	8.33572	8.306	9.89057	9.83772	10.1233	5.84479	5.78881	5.73719
sp|P28778|RT06_YEAST	MRP17	37S ribosomal protein MRP17, mitochondrial	3	9.38512	9.799	9.92245	7.18858	7.29749	7.11481	10.0043	9.71203	10.3703	6.46907	6.57873	6.15817
sp|P10663|RT02_YEAST	MRP2	37S ribosomal protein MRP2, mitochondrial	3	9.97646	10.3298	10.0024	6.52832	6.30694	7.20898	10.7584	9.47688	11.2938	6.21754	6.10787	5.7926
sp|P32387|RM41_YEAST	MRP20	54S ribosomal protein L41, mitochondrial	5	9.88884	9.53927	10.0374	8.52646	8.07473	8.18662	9.90896	9.85759	10.3138	4.90666	5.42083	5.33874
sp|P38175|RT21_YEAST	MRP21	37S ribosomal protein MRP21, mitochondrial	7	9.68785	9.51416	9.40781	7.48311	7.08988	7.30334	8.69772	8.5959	8.81308	7.60584	8.22504	7.57628
sp|P32902|RT04_YEAST	MRP4	37S ribosomal protein MRP4, mitochondrial	14	7.99496	8.13826	8.47342	5.72925	6.41224	6.22442	12.4647	13.1715	11.2217	6.16887	7.09032	6.91039
sp|P32388|RM49_YEAST	MRP49	54S ribosomal protein MRP49, mitochondrial	5	8.33354	8.04575	8.39158	7.85364	7.7697	8.31419	10.1904	10.506	10.3101	6.57555	7.06184	6.64764
sp|Q02950|RT51_YEAST	MRP51	37S ribosomal protein MRP51, mitochondrial	10	9.14544	9.88623	9.60629	7.54533	7.68923	7.5326	9.94698	10.2109	10.4403	6.09782	5.94753	5.95134
sp|P12687|RM02_YEAST	MRP7	54S ribosomal protein L2, mitochondrial	6	9.3722	8.71124	9.1268	8.64014	8.28275	8.11556	10.1225	10.0745	10.9931	5.49915	5.3042	5.7579
sp|P35719|MRP8_YEAST	MRP8	Uncharacterized protein MRP8	22	12.0917	11.275	12.0591	9.22132	9.50903	8.96299	6.95143	6.92572	6.87816	5.23301	5.43889	5.45364
sp|Q04599|RM01_YEAST	MRPL1	54S ribosomal protein L1, mitochondrial	11	8.02342	8.3223	8.43364	8.49272	8.27127	8.81112	10.351	10.3386	10.7812	6.00034	6.10267	6.07175
sp|P36520|RM10_YEAST	MRPL10	54S ribosomal protein L10, mitochondrial	13	10.2489	10.3518	10.1933	7.74036	7.77874	7.86946	9.64537	9.65047	9.83652	5.62016	5.67245	5.39244
sp|P36521|RM11_YEAST	MRPL11	54S ribosomal protein L11, mitochondrial	10	8.69328	8.27236	8.31296	7.42306	7.12119	7.23461	11.3459	11.7592	10.9017	6.10521	6.31444	6.51611
sp|Q02204|RM13_YEAST	MRPL13	54S ribosomal protein L13, mitochondrial	6	8.15842	8.54737	8.12486	6.08643	6.06152	6.29667	12.1989	12.5385	11.9309	6.64133	6.63831	6.77683
sp|P36523|RM15_YEAST	MRPL15	54S ribosomal protein L15, mitochondrial	12	8.667	8.24839	8.84008	8.12184	7.41768	7.76051	10.99	11.1107	11.5691	5.61517	5.85988	5.79964
sp|P38064|RM16_YEAST	MRPL16	54S ribosomal protein L16, mitochondrial	7	10.4795	10.9614	10.675	8.48215	8.4912	8.42951	9.09656	9.61442	9.12798	4.77963	4.89203	4.97061
sp|P36528|RM17_YEAST	MRPL17	54S ribosomal protein L17, mitochondrial	16	8.02018	8.19367	8.30823	7.85178	7.71007	7.92198	10.9907	11.0946	11.2699	6.06442	6.33659	6.2379
sp|P53875|RM19_YEAST	MRPL19	54S ribosomal protein L19, mitochondrial	8	8.58227	8.50114	8.45544	7.38594	7.58034	7.59686	11.0431	10.869	11.0654	6.1538	6.46379	6.30299
sp|P22354|RM20_YEAST	MRPL20	54S ribosomal protein L20, mitochondrial	6	9.33354	9.75698	9.36793	8.82653	8.90095	8.37779	8.62561	8.78741	8.53039	6.75501	6.40737	6.33049
sp|P53881|RM22_YEAST	MRPL22	54S ribosomal protein L22, mitochondrial	8	9.96802	9.94814	10.5569	7.96399	8.67721	8.35629	9.30036	9.56585	9.98183	4.92987	4.95517	5.79637
sp|Q12487|RM23_YEAST	MRPL23	54S ribosomal protein L23, mitochondrial	3	9.54753	9.20382	9.59336	8.02587	7.83373	7.62462	9.31539	9.27471	9.87537	5.87026	6.87608	6.95926
sp|P36525|RM24_YEAST	MRPL24	54S ribosomal protein L24, mitochondrial	10	9.84263	10.5513	10.2426	7.80727	7.81419	8.4954	10.1602	10.0523	9.97825	4.79353	5.06024	5.20207
sp|P23369|RM25_YEAST	MRPL25	54S ribosomal protein L25, mitochondrial	6	10.1112	10.169	10.3721	8.30341	7.3354	7.61532	10.1504	10.0873	9.94055	4.82104	5.79678	5.29752
sp|P36526|RM27_YEAST	MRPL27	54S ribosomal protein L27, mitochondrial	5	10.5453	9.51711	10.5218	7.96181	7.12616	7.6089	9.90212	9.69747	10.225	5.6816	5.44249	5.77023
sp|P36527|RM28_YEAST	MRPL28	54S ribosomal protein L28, mitochondrial	6	9.44424	8.85118	9.64803	6.92842	6.59817	7.15128	11.1619	10.9469	11.1573	6.21887	5.95777	5.93589
sp|P36516|RM03_YEAST	MRPL3	54S ribosomal protein L3, mitochondrial	11	8.98077	8.95975	8.91152	7.51931	7.72442	7.77377	10.9124	10.5417	11.0922	5.87326	5.75806	5.95288
sp|P14063|RM31_YEAST	MRPL31	54S ribosomal protein L31, mitochondrial	4	9.16199	9.13314	9.50585	7.47064	7.62735	7.67257	10.266	9.7779	11.0245	5.66795	5.98646	6.70571
sp|P25348|RM32_YEAST	MRPL32	54S ribosomal protein L32, mitochondrial	2	8.80025	9.3927	9.65429	9.01803	8.32468	8.41779	10.8887	10.4207	10.2995	4.81841	4.94281	5.02222
sp|P20084|RM33_YEAST	MRPL33	54S ribosomal protein L33, mitochondrial	5	9.19933	8.48858	8.92625	7.69392	7.14837	7.35701	9.95968	9.62068	10.8542	6.9486	7.03383	6.76954
sp|Q06678|RM35_YEAST	MRPL35	54S ribosomal protein L35, mitochondrial	13	9.26755	8.66245	8.99861	7.70594	7.9893	7.95626	10.7137	10.677	11.3242	5.44679	5.65501	5.60313
sp|P36531|RM36_YEAST	MRPL36	54S ribosomal protein L36, mitochondrial	7	8.52091	8.89564	9.11038	8.07693	7.66675	7.66944	10.7188	10.7169	11.3358	6.21745	5.58971	5.48128
sp|P36532|RM37_YEAST	MRPL37	54S ribosomal protein L37, mitochondrial	3	8.76389	8.3201	8.39592	7.26233	7.73529	6.89689	10.6781	10.8518	10.2189	6.6288	7.18889	7.05904
sp|P35996|RM38_YEAST	MRPL38	54S ribosomal protein L38, mitochondrial	2	9.32656	8.52581	10.1561	9.9342	10.2932	9.23518	9.27822	7.94798	10.4711	5.35364	4.83174	4.64621
sp|P36533|RM39_YEAST	MRPL39	54S ribosomal protein L39, mitochondrial	3	8.89178	7.05945	6.78363	6.53058	6.53504	6.66082	10.4867	10.054	12.2365	8.30219	8.35794	8.10129
sp|P36517|RM04_YEAST	MRPL4	54S ribosomal protein L4, mitochondrial	7	9.48146	7.7437	8.29799	9.59089	7.64036	7.37699	10.6148	9.42286	12.7153	4.70238	5.44021	6.97303
sp|P36534|RM40_YEAST	MRPL40	54S ribosomal protein L40, mitochondrial	14	9.5897	9.17542	9.37582	7.33696	7.80417	7.63414	10.2344	10.4773	10.5604	5.8129	5.99917	5.99954
sp|P19956|RM44_YEAST	MRPL44	54S ribosomal protein L44, mitochondrial	5	9.55367	10.0208	9.07937	8.15044	7.74793	7.9507	8.82865	9.30502	9.38095	6.04286	6.74808	7.19157
sp|P40858|RN49_YEAST	MRPL49	54S ribosomal protein L49, mitochondrial	5	9.78239	9.93062	8.22169	5.68231	5.90756	5.67455	11.8806	11.8305	11.7234	6.48406	6.37409	6.50816
sp|P53724|RM50_YEAST	MRPL50	54S ribosomal protein L50, mitochondrial	3	9.86424	9.44984	9.63319	7.23835	6.91444	6.97488	10.6351	10.2887	10.1604	6.2318	6.27265	6.33632
sp|Q06090|RM51_YEAST	MRPL51	54S ribosomal protein L51, mitochondrial	3	9.86642	9.19975	9.5037	9.12449	7.8557	7.93459	9.24008	9.59427	10.46	5.83585	5.59502	5.79012
sp|P32904|RM06_YEAST	MRPL6	54S ribosomal protein L6, mitochondrial	7	9.66268	10.4248	9.69242	7.89215	8.10317	8.34871	9.6147	10.0453	9.3438	5.7752	5.30435	5.7927
sp|P36519|RM07_YEAST	MRPL7	54S ribosomal protein L7, mitochondrial	5	9.04893	8.79409	8.6288	7.70526	7.97973	7.84011	12.0806	11.2949	11.5766	5.04337	4.95942	5.0482
sp|P22353|RM08_YEAST	MRPL8	54S ribosomal protein L8, mitochondrial	7	9.21419	8.97949	8.99898	7.41665	7.73203	7.15797	10.1098	10.8391	10.2638	6.37848	6.21941	6.69015
sp|P31334|RM09_YEAST	MRPL9	54S ribosomal protein L9, mitochondrial	9	9.19764	9.94686	9.17228	8.36708	8.06974	8.07253	9.79583	9.97297	10.0541	5.65125	5.80375	5.89601
sp|P53732|RT12_YEAST	MRPS12	37S ribosomal protein S12, mitochondrial	1	9.64834	7.85566	9.95396	6.80972	5.47914	6.72337	8.9717	10.7976	13.4289	6.87904	5.42187	8.03071
sp|Q02608|RT16_YEAST	MRPS16	37S ribosomal protein S16, mitochondrial	2	9.56182	10.1908	12.1149	4.97307	3.70734	3.82529	12.2307	13.0245	13.8454	5.60647	6.11685	4.80289
sp|Q03246|RT17_YEAST	MRPS17	37S ribosomal protein S17, mitochondrial	8	9.3867	9.9268	9.79963	6.0515	6.57237	6.59524	11.2662	10.7983	10.8528	6.35057	6.31111	6.08876
sp|P42847|RT18_YEAST	MRPS18	37S ribosomal protein S18, mitochondrial	8	8.42687	8.21723	7.63968	5.68852	5.90077	6.15615	12.8863	12.8397	11.9007	6.86462	6.58636	6.89312
sp|P21771|RT28_YEAST	MRPS28	37S ribosomal protein S28, mitochondrial	11	9.84487	9.97652	9.52217	5.35692	5.44185	5.63144	12.0679	11.8208	11.9508	6.04962	6.08361	6.25352
sp|P53292|RT35_YEAST	MRPS35	37S ribosomal protein S35, mitochondrial	14	9.70202	9.95354	9.75407	6.63046	6.72007	6.79517	11.2996	11.1526	11.2656	5.42245	5.79371	5.51067
sp|P33759|RT05_YEAST	MRPS5	37S ribosomal protein S5, mitochondrial	11	9.35627	9.49874	9.72088	6.13139	6.20404	6.09408	11.3268	11.3658	11.4538	5.95164	6.45375	6.4429
sp|Q03799|RT08_YEAST	MRPS8	37S ribosomal protein S8, mitochondrial	4	8.50619	9.28106	8.85757	7.02213	7.1535	7.25083	10.0035	10.6022	9.90296	6.94888	7.12862	7.34254
sp|P38120|RT09_YEAST	MRPS9	37S ribosomal protein S9, mitochondrial	11	9.51271	9.80671	9.0274	5.90345	5.55051	5.74947	12.2253	11.5256	12.6421	5.59679	5.80092	6.65909
sp|P07266|MRS1_YEAST	MRS1	Mitochondrial RNA-splicing protein MRS1	3	9.4152	10.6486	8.79739	8.84063	7.72809	7.54621	9.63197	9.22313	8.91451	6.02321	6.24936	6.98168
[truncated: 2,483 more rows]
