# Supplementary material for: Comparative Proteomic Analysis of Two Commonly Used Laboratory Yeast Strains: W303 and BY4742
Source: Proteomes. 2023 Oct 9;11(4):30. doi: 10.3390/proteomes11040030 (PMC10594481; doi:10.3390/proteomes11040030)
Supplement: Supplementary file 1 [file proteomes-11-00030-s001.zip › Table S2_wt .xlsx]

## Sheet: List of peptides
Table S2: Peptides quantified in the experiment. Columns include: Uniprot protein ID, gene symbol, protein description, protein group ID, redundancy, whether peptide is a unique or razor peptide, peptide sequence, and TMT signal-to-noise for all channels.
						126_sn scaled	127n_sn scaled	127c_sn scaled	128n_sn scaled	128c_sn scaled	129n_sn scaled	129c_sn scaled	130n_sn scaled	130c_sn scaled	131_sn scaled	131c_sn scaled	132n_sn scaled
ProteinId	GeneSymbol	Description	Redundancy	Unique/Razor	PeptideSequence	W303 stationary rep1	W303 stationary rep2	W303 stationary rep3	BY4742 stationary rep1	BY4742 stationary rep2	BY4742 stationary rep3	W303 exponential rep1	W303 exponential rep2	W303 exponential rep3	BY4742 exponential rep1	BY4742 exponential rep2	BY4742 exponential rep3
sp|P35999|PMIP_YEAST	OCT1	Mitochondrial intermediate peptidase	0	U	K.SGIYMNPDVR.E	12.6333	16.7414	13.8478	14.4444	15.9479	19.0277	8.21102	13.6031	11.0174	9.40736	8.99147	10.8669
sp|P35999|PMIP_YEAST	OCT1	Mitochondrial intermediate peptidase	0	U	K.NPYLTSPDGLR.K	66.6178	65.4302	75.7408	126.926	121.779	121.418	62.4481	44.7414	55.8388	77.673	79.6942	69.3809
sp|P35999|PMIP_YEAST	OCT1	Mitochondrial intermediate peptidase	0	U	R.AILANLMHK.T	202.4	234.667	232.071	288.668	268.629	285.821	201.026	211.801	200.795	145.379	180.605	177.075
sp|P35999|PMIP_YEAST	OCT1	Mitochondrial intermediate peptidase	0	U	K.IFDDNSYWR.N	18.146	15.4761	14.9705	21.6145	24.4709	24.8079	18.1281	15.9806	16.8545	11.2778	14.3696	11.7905
sp|P35999|PMIP_YEAST	OCT1	Mitochondrial intermediate peptidase	0	U	K.SVLNNPEVSSK.L	55.6261	55.7246	51.7244	71.6663	67.7676	62.2682	46.2065	40.9158	47.3441	35.284	40.5172	44.8389
sp|P35999|PMIP_YEAST	OCT1	Mitochondrial intermediate peptidase	0	U	K.KPLTTNTDEILK.L	78.1405	89.2288	90.3366	112.798	105.301	100.825	82.3232	72.1385	86.9859	61.4514	67.0511	58.0196
sp|P35999|PMIP_YEAST	OCT1	Mitochondrial intermediate peptidase	0	U	K.YFQLNPSNSPNAK.E	124.23	136.694	138.735	153.007	163.541	142.826	112.964	122.339	112.814	86.8924	94.7375	89.8268
sp|P35999|PMIP_YEAST	OCT1	Mitochondrial intermediate peptidase	0	U	R.NDFSESGK.L	205.393	229.492	214.145	249.008	256.743	259.741	190.881	204.576	179.92	158.15	161.604	166.026
sp|P35999|PMIP_YEAST	OCT1	Mitochondrial intermediate peptidase	0	U	K.VSTFLLK.Q	21.8546	18.3679	22.3066	18.8986	18.1166	26.2812	21.2418	16.1246	23.4471	17.1534	9.51301	19.3239
sp|P04710|ADT1_YEAST	AAC1	ADP,ATP carrier protein 1	0	U	K.EGAYSLFK.G	79.3347	83.2372	75.6119	43.6328	50.0477	47.0238	11.906	15.9464	17.347	10.8032	14.6704	12.7031
sp|P04710|ADT1_YEAST	AAC1	ADP,ATP carrier protein 1	0	U	R.GFVPSVLGIIVYR.G	380.687	503.701	555.596	251.24	237.892	262.882	22.7039	19.0072	37.3327	13.9377	11.8504	12.055
sp|P04710|ADT1_YEAST	AAC1	ADP,ATP carrier protein 1	0	U	K.EGAYSLFK.G	159.945	193.523	175.805	105.041	105.633	104.226	43.9938	47.8539	50.7191	41.292	45.2622	45.4435
sp|P04710|ADT1_YEAST	AAC1	ADP,ATP carrier protein 1	0	U	K.EGAYSLFK.G	450.632	479.152	473.101	265.844	256.003	279.075	71.9953	64.465	77.8377	55.5312	51.944	54.3043
sp|P04710|ADT1_YEAST	AAC1	ADP,ATP carrier protein 1	0	U	K.LLM*QNQEEMLK.Q	222.002	226.539	219.104	89.0221	95.098	92.6698	35.062	42.6678	28.6986	45.2439	32.6503	30.0837
sp|P04710|ADT1_YEAST	AAC1	ADP,ATP carrier protein 1	0	U	K.TDGLLGLYR.G	82.4728	88.1747	96.4285	48.1151	52.4647	44.7609	7.67711	11.8377	10.2528	8.04447	7.35582	8.25184
sp|P18238|ADT3_YEAST	AAC3	ADP,ATP carrier protein 3	0	U	K.IVASEGVGSLFK.G	13.0088	9.42507	10.6911	13.1409	24.6463	20.8363	10.2931	11.9088	13.6624	16.4076	23.0708	21.0385
sp|Q02895|AAD16_YEAST	AAD16	Putative aryl-alcohol dehydrogenase AAD16	0	U	R.LGTYIDLLQIHR.L	85.7778	82.2977	84.2917	25.8263	22.3866	28.9576	40.4791	42.6053	43.1398	9.44263	7.26688	9.08342
sp|P53909|ADE_YEAST	AAH1	Adenine deaminase	0	U	K.SVEELNEK.Y	0.00222002	0	0	0	0	2.12404	65.5593	66.2599	61.5814	65.2169	73.3966	60.8131
sp|P53909|ADE_YEAST	AAH1	Adenine deaminase	0	U	K.RNDIILPEGFPK.S	7.22501	4.84732	5.03343	6.58479	1.86544	6.9059	19.3504	19.2473	17.4096	15.3055	15.0092	14.7329
sp|P53909|ADE_YEAST	AAH1	Adenine deaminase	0	U	K.LQVVQSVSELPLQK.F	7.01109	10.575	11.7623	10.5415	6.81788	8.526	79.3166	79.0445	75.3384	72.8281	72.5225	75.2006
sp|P53909|ADE_YEAST	AAH1	Adenine deaminase	0	U	K.TIEEATPFIK.D	16.1909	18.0279	11.7355	14.6393	10.4635	17.826	80.7713	79.2013	77.0489	59.9723	61.4195	71.9928
sp|P53909|ADE_YEAST	AAH1	Adenine deaminase	0	U	K.TIEEATPFIK.D	12.1251	14.4796	12.0309	14.9519	7.93678	9.02182	366.996	358.84	400.866	267.044	337.692	392.513
sp|P53909|ADE_YEAST	AAH1	Adenine deaminase	0	U	K.DFPHWDHETWGR.I	9.54297	11.3595	10.1255	7.97178	12.3892	8.72498	139.242	129.405	138.335	145.484	137.055	140.009
sp|P53909|ADE_YEAST	AAH1	Adenine deaminase	0	U	K.LQVVQSVSELPLQK.F	5.23774	9.91612	13.3515	7.78952	13.2132	8.44776	97.2792	97.7934	99.4113	80.2049	93.4878	89.0256
sp|P53909|ADE_YEAST	AAH1	Adenine deaminase	0	U	K.RNDIILPEGFPK.S	17.9934	21.5705	14.9874	24.0249	26.9119	31.9321	109.069	111.675	106.487	97.4078	100.032	97.8278
sp|P53909|ADE_YEAST	AAH1	Adenine deaminase	0	U	K.SVEELNEK.Y	8.5856	11.772	13.7757	10.1129	4.85393	9.65942	94.7482	89.152	94.0958	81.2696	82.1582	80.9016
sp|P53909|ADE_YEAST	AAH1	Adenine deaminase	0	U	K.AFSEFGITSK.L	0	1.92877	2.75429	2.01455	0	2.05661	24.2608	21.3727	21.5397	15.7308	16.1161	22.4257
sp|P53909|ADE_YEAST	AAH1	Adenine deaminase	0	U	R.NDIILPEGFPK.S	33.3747	29.8908	31.743	38.5179	40.7031	43.9763	258.226	248.262	226.771	322.118	279.98	254.432
sp|P37898|AAP1_YEAST	AAP1	Alanine/arginine aminopeptidase	0	U	K.QAIPALFK.A	71.7187	73.7384	68.0684	81.976	99.4978	102.182	77.2614	76.0346	74.9577	82.2482	88.3754	75.0177
sp|P37898|AAP1_YEAST	AAP1	Alanine/arginine aminopeptidase	0	U	R.YLSTGDVK.E	131.385	132.606	131.072	150.862	178.765	158.54	163.637	185.272	161.687	188.291	178.578	167.575
sp|P37898|AAP1_YEAST	AAP1	Alanine/arginine aminopeptidase	0	U	K.YMATTQMEATDAR.R	15.9161	17.3785	17.8925	24.5815	25.6403	27.0014	33.5203	30.08	29.2596	23.8644	27.4669	27.7523
sp|P37898|AAP1_YEAST	AAP1	Alanine/arginine aminopeptidase	0	U	R.YVESNNFR.I	31.8083	28.3125	33.8253	45.9514	51.4953	43.1705	50.3434	45.888	38.7237	48.1527	42.2424	39.6234
sp|P37898|AAP1_YEAST	AAP1	Alanine/arginine aminopeptidase	0	U	K.DSTGIDNTLVLNEK.S	80.6206	88.5588	85.4514	114.304	125.866	116.081	135.433	139.524	124.78	147.106	134.828	114.321
sp|P37898|AAP1_YEAST	AAP1	Alanine/arginine aminopeptidase	0	U	K.YTTFNTTPK.M	58.7248	65.7957	57.3157	81.1441	84.6025	75.8543	87.375	79.1741	73.8843	82.9226	87.9942	88.1223
sp|P37898|AAP1_YEAST	AAP1	Alanine/arginine aminopeptidase	0	U	K.ATLVFPNGTFENLGPSAK.L	45.5224	50.6849	45.6521	44.4497	50.7007	45.0102	39.9329	39.0913	34.6842	30.5958	38.7797	46.9127
sp|P37898|AAP1_YEAST	AAP1	Alanine/arginine aminopeptidase	0	U	K.IFNIYQNPVSSEEK.I	87.2061	88.6525	101.337	105.752	113.305	112.994	132.206	136.837	139.199	127.928	133.526	132.182
sp|P37898|AAP1_YEAST	AAP1	Alanine/arginine aminopeptidase	0	U	K.FGQFAANLAAR.T	15.0899	16.9477	14.8255	25.0496	17.3346	22.7548	19.2472	17.6203	18.4432	14.7048	15.347	21.3912
sp|P37898|AAP1_YEAST	AAP1	Alanine/arginine aminopeptidase	0	U	R.VYSTPGDEK.F	124.394	135.469	114.302	158.84	170.26	175.172	143.753	156.511	148.043	169.877	143.06	158.472
sp|P37898|AAP1_YEAST	AAP1	Alanine/arginine aminopeptidase	0	U	K.VWEQYVTDNLQR.A	9.53215	9.51997	11.7891	12.264	12.2942	14.3329	11.8802	9.9147	18.9038	20.2362	16.272	11.8085
sp|P37898|AAP1_YEAST	AAP1	Alanine/arginine aminopeptidase	0	U	R.IEGVNAIEVNK.N	20.9101	21.1828	22.3443	26.3631	35.9153	22.855	24.1233	30.9373	28.1606	28.4041	20.1997	23.9763
sp|P37898|AAP1_YEAST	AAP1	Alanine/arginine aminopeptidase	0	U	R.DREIVATYLR.E	39.4092	35.8274	40.042	60.8325	48.0424	51.2174	79.7514	60.3286	69.207	37.616	56.0258	62.5505
sp|P37898|AAP1_YEAST	AAP1	Alanine/arginine aminopeptidase	0	U	R.EIVATYLR.E	81.6657	104.973	99.0589	109.839	118.598	116.598	148.584	149.263	139.132	161.214	156.57	150.069
sp|P37898|AAP1_YEAST	AAP1	Alanine/arginine aminopeptidase	0	U	K.YTTFNTTPK.M	107.568	106.401	111.93	144.157	151.828	135.533	148.129	132.841	132.142	146.75	149.547	151.023
sp|P37898|AAP1_YEAST	AAP1	Alanine/arginine aminopeptidase	0	U	K.YM*ATTQMEATDAR.R	36.7302	35.1347	34.9028	42.9077	46.4528	50.1408	39.7896	51.2448	49.0864	39.8996	46.5504	48.2404
sp|P37898|AAP1_YEAST	AAP1	Alanine/arginine aminopeptidase	0	U	K.YMATTQMEATDAR.R	14.1859	11.5377	15.1642	13.5755	14.3293	17.5507	19.4452	20.8044	14.7499	19.3816	20.289	14.3091
sp|P37898|AAP1_YEAST	AAP1	Alanine/arginine aminopeptidase	0	U	K.FGQFAANLAAR.T	19.8311	23.212	21.8462	29.1845	23.6541	25.4971	24.6513	28.3113	27.62	25.8014	27.291	31.2326
sp|P37898|AAP1_YEAST	AAP1	Alanine/arginine aminopeptidase	0	U	R.AFTFEGSLK.I	44.3306	44.9378	42.1649	41.8813	54.0289	43.7312	64.1988	77.5544	56.8845	71.2175	75.8389	68.5246
sp|P37898|AAP1_YEAST	AAP1	Alanine/arginine aminopeptidase	0	U	R.VYSTPGDEK.F	648.997	649.801	647.493	822.724	895.486	858.205	839.661	833.268	800.997	859.723	825.754	799.661
sp|P37898|AAP1_YEAST	AAP1	Alanine/arginine aminopeptidase	0	U	R.IEGVNAIEVNK.N	53.4293	66.2831	63.589	75.6932	85.8613	91.5802	74.1723	85.3631	58.403	85.5974	76.5411	72.1216
sp|P37898|AAP1_YEAST	AAP1	Alanine/arginine aminopeptidase	0	U	R.VGLVADAK.A	103.547	111.993	125.034	133.945	164.43	162.971	150.068	145.952	147.867	151.391	168.716	148.471
sp|P37898|AAP1_YEAST	AAP1	Alanine/arginine aminopeptidase	0	U	R.VGLVADAK.A	218.131	223.278	240.113	308.34	310.931	319.056	316.932	332.809	308.021	359.412	342.275	322.733
sp|P37898|AAP1_YEAST	AAP1	Alanine/arginine aminopeptidase	0	U	K.QAIPALFK.A	99.3918	105.001	116.375	131.149	147.904	142.372	125.224	136.738	130.907	133.752	142.265	135.61
sp|P37898|AAP1_YEAST	AAP1	Alanine/arginine aminopeptidase	0	U	R.SSHPIEVPVNNADEINQIFDAISYSK.G	69.8557	69.3611	73.4487	143.513	97.0094	88.2472	91.1836	74.7368	157.111	97.8683	84.4048	155.812
sp|P37898|AAP1_YEAST	AAP1	Alanine/arginine aminopeptidase	0	U	R.YLSTGDVK.E	296.435	309.407	294.01	330.966	381.801	372.272	417.565	428.438	380.679	435.842	398.513	374.179
sp|P32357|AAR2_YEAST	AAR2	A1 cistron-splicing factor AAR2	0	U	K.DENQFSYVDSSMTTVQENELLK.S	13.4876	22.6595	10.2701	20.0862	22.4275	24.3927	12.0584	10.6108	7.08612	17.5377	12.4956	11.2614
sp|P32357|AAR2_YEAST	AAR2	A1 cistron-splicing factor AAR2	0	U	K.NEDDPAHSLNYTVINFK.S	11.2982	10.1659	9.77777	15.2261	10.0314	15.5912	6.12377	5.62234	7.10216	11.9291	4.8549	6.66295
sp|P32357|AAR2_YEAST	AAR2	A1 cistron-splicing factor AAR2	0	U	K.LDEILYYQIK.T	73.868	74.9233	79.3644	105.266	98.4634	114.565	57.9622	63.6465	59.3149	75.3736	76.8733	84.2043
sp|Q01802|AATM_YEAST	AAT1	Aspartate aminotransferase, mitochondrial	0	U	R.DIWIPDPSWANHK.N	26.9379	25.6364	25.9497	20.4112	23.5644	18.0391	31.2961	40.7529	33.4496	33.0142	26.6625	29.5212
sp|Q01802|AATM_YEAST	AAT1	Aspartate aminotransferase, mitochondrial	0	U	R.DIWIPDPSWANHK.N	27.7415	22.2329	20.8809	17.8766	23.0651	14.7853	34.2545	39.6564	32.3539	35.1348	37.2079	28.2726
sp|Q01802|AATM_YEAST	AAT1	Aspartate aminotransferase, mitochondrial	0	U	R.GMYSSPPGYGSR.V	27.2463	24.1801	28.2776	17.4916	16.376	17.797	31.7847	25.7116	29.287	19.8112	27.1026	27.3779
sp|Q01802|AATM_YEAST	AAT1	Aspartate aminotransferase, mitochondrial	0	U	K.EFQENVMK.F	186.246	187.727	170.6	128.501	140.824	148.464	194.139	185.575	189.224	135.371	140.064	150.094
sp|Q01802|AATM_YEAST	AAT1	Aspartate aminotransferase, mitochondrial	0	U	K.IIDTIYELK.M	75.7301	77.5146	84.0456	54.5629	56.8391	62.295	80.2595	88.9148	75.3234	70.4832	73.5549	67.2199
sp|Q01802|AATM_YEAST	AAT1	Aspartate aminotransferase, mitochondrial	0	U	K.IDLTVGIYK.D	72.7637	70.4295	84.4012	44.9915	49.3469	49.4027	75.208	77.4033	65.4805	72.3834	65.9533	60.3263
sp|Q01802|AATM_YEAST	AAT1	Aspartate aminotransferase, mitochondrial	0	U	R.VVNVVLSDFK.L	24.8007	25.8055	25.9279	16.2424	13.2657	15.4025	28.8191	35.0771	26.9481	21.5958	22.8948	20.9781
sp|Q01802|AATM_YEAST	AAT1	Aspartate aminotransferase, mitochondrial	0	U	R.VVNVVLSDFK.L	14.2797	8.02816	10.4886	5.6955	7.07344	7.77475	7.7215	12.6397	14.5494	10.5231	8.7184	7.14331
sp|Q01802|AATM_YEAST	AAT1	Aspartate aminotransferase, mitochondrial	0	U	K.NSLQQNIDSQLK.K	19.6214	12.5612	12.9488	11.4997	6.96505	10.1758	9.30447	12.6267	11.542	11.5313	10.9285	8.11779
sp|Q01802|AATM_YEAST	AAT1	Aspartate aminotransferase, mitochondrial	0	U	R.DIWIPDPSWANHK.N	85.1391	79.8986	82.9132	49.6738	45.1792	51.1418	89.2223	93.7559	87.5916	76.9056	76.8563	79.1005
sp|Q01802|AATM_YEAST	AAT1	Aspartate aminotransferase, mitochondrial	0	U	K.TFAYNNQQENNK.N	48.1894	57.757	61.051	35.6927	36.0409	28.8493	55.6657	57.1881	59.5411	54.8103	47.7158	57.515
sp|Q01802|AATM_YEAST	AAT1	Aspartate aminotransferase, mitochondrial	0	U	R.NNYFVYLTGDGR.L	24.0709	21.014	22.4387	12.0947	10.4162	13.6783	22.8417	27.6451	25.006	20.6686	21.8085	18.563
sp|P23542|AATC_YEAST	AAT2	Aspartate aminotransferase, cytoplasmic	0	U	K.LLETPELTEQWHK.D	117.301	131.64	128.967	115.711	132.003	130.195	110.569	99.5003	95.6913	110.698	107.715	100.832
sp|P23542|AATC_YEAST	AAT2	Aspartate aminotransferase, cytoplasmic	0	U	K.LLETPELTEQWHK.D	180.326	182.019	187.581	179.113	194.844	186.292	158.843	172.347	156.679	146.853	163.308	171.743
sp|P23542|AATC_YEAST	AAT2	Aspartate aminotransferase, cytoplasmic	0	U	K.TATYPYWANETK.S	42.2113	32.9754	42.9627	45.8834	45.138	43.2435	39.5904	45.1411	42.4527	36.8362	39.3053	39.1587
sp|P23542|AATC_YEAST	AAT2	Aspartate aminotransferase, cytoplasmic	0	U	K.NHIALFDTAYQGFATGDLDK.D	14.2171	19.1745	16.7439	20.8169	18.5496	21.5107	24.4171	23.8787	16.9774	23.4478	22.9826	24.2584
sp|P23542|AATC_YEAST	AAT2	Aspartate aminotransferase, cytoplasmic	0	U	K.SLDLNGFLNAIQK.A	22.876	24.9308	21.3048	33.4465	30.9755	34.0583	19.6749	27.8667	30.0505	21.1279	26.3611	29.2447
sp|P23542|AATC_YEAST	AAT2	Aspartate aminotransferase, cytoplasmic	0	U	K.NHIALFDTAYQGFATGDLDK.D	19.469	17.0752	17.7958	23.4421	28.2112	26.3959	17.1973	20.3675	19.1373	15.901	17.5721	19.2933
sp|P23542|AATC_YEAST	AAT2	Aspartate aminotransferase, cytoplasmic	0	U	K.SLDLNGFLNAIQK.A	286.932	266.585	271.274	362.07	368.776	347.423	291.213	293.666	302.022	260.738	279.183	320.711
sp|P23542|AATC_YEAST	AAT2	Aspartate aminotransferase, cytoplasmic	0	U	K.SLDLNGFLNAIQK.A	149.653	139.065	147.293	190.541	201.293	180.12	144.433	152.091	150.035	142.841	138.629	143.409
sp|P23542|AATC_YEAST	AAT2	Aspartate aminotransferase, cytoplasmic	0	U	K.PAVTSQLAK.I	398.236	321.267	431.384	468.471	478.957	459.433	358.358	316.608	371.373	337.72	329.971	337.326
sp|P23542|AATC_YEAST	AAT2	Aspartate aminotransferase, cytoplasmic	0	U	R.LEETHAVYLVASGR.A	41.9604	25.9299	26.3206	44.6756	39.8777	27.2963	29.3871	24.3371	29.3906	25.1273	28.8592	33.466
sp|P23542|AATC_YEAST	AAT2	Aspartate aminotransferase, cytoplasmic	0	U	R.LEETHAVYLVASGR.A	20.5851	11.8458	14.8061	21.9672	18.1755	20.4467	13.2505	16.8675	14.7767	11.9042	16.3512	17.3209
sp|P23542|AATC_YEAST	AAT2	Aspartate aminotransferase, cytoplasmic	0	U	R.LEETHAVYLVASGR.A	10.6532	9.55171	11.1094	18.1542	13.4329	7.97569	13.3092	9.33501	14.9369	13.6002	11.2837	12.6936
sp|P23542|AATC_YEAST	AAT2	Aspartate aminotransferase, cytoplasmic	0	U	R.SEVSNPPAYGAK.I	344.831	315.332	337.214	378.43	383.929	362.018	270.752	256.39	250.95	249.876	252.173	223.645
sp|P23542|AATC_YEAST	AAT2	Aspartate aminotransferase, cytoplasmic	0	U	R.SEVSNPPAYGAK.I	65.7589	67.7103	83.6836	88.9126	74.7622	82.1097	57.942	51.422	63.8415	61.968	68.0361	54.8884
sp|P23542|AATC_YEAST	AAT2	Aspartate aminotransferase, cytoplasmic	0	U	K.IIFGTQSDAFQEDR.V	136.01	156.676	142.556	140.489	151.972	155.034	148.724	160.011	135.59	148.272	130.208	134.071
sp|P23542|AATC_YEAST	AAT2	Aspartate aminotransferase, cytoplasmic	0	U	K.VDLGIGAYR.D	68.9873	59.9635	56.0659	65.4604	65.0694	57.2622	49.0722	56.6922	44.2991	55.0927	45.0907	47.5469
sp|P23542|AATC_YEAST	AAT2	Aspartate aminotransferase, cytoplasmic	0	U	K.IIFGTQSDAFQEDR.V	46.4169	47.6319	45.0241	32.564	41.1374	37.2294	40.9068	42.6876	43.1325	31.4274	45.8458	32.1687
sp|P23542|AATC_YEAST	AAT2	Aspartate aminotransferase, cytoplasmic	0	U	K.PAVTSQLAK.I	35.0774	26.6111	36.7996	33.9772	36.6258	42.8006	27.0178	27.0076	36.6031	25.792	26.3899	25.5012
sp|P23542|AATC_YEAST	AAT2	Aspartate aminotransferase, cytoplasmic	0	U	R.LEETHAVYLVASGR.A	113.704	84.8095	85.9677	121.154	115.851	96.844	83.711	78.8672	87.9019	92.8134	77.2417	103.793
sp|P23542|AATC_YEAST	AAT2	Aspartate aminotransferase, cytoplasmic	0	U	K.RLEETHAVYLVASGR.A	320.445	237.638	232.795	362.802	274.844	275.112	325.339	267.079	315.435	203.248	209.494	282.701
sp|P23542|AATC_YEAST	AAT2	Aspartate aminotransferase, cytoplasmic	0	U	K.NAGMYGER.V	106.465	101.277	107.136	117.509	121	127.468	126.401	117.914	112.273	105.093	109.096	126.322
sp|P23542|AATC_YEAST	AAT2	Aspartate aminotransferase, cytoplasmic	0	U	K.PAVTSQLAK.I	467.595	370.004	494.061	526.073	580.785	552.828	380.125	347.436	398.525	363.077	360.28	350.988
sp|P23542|AATC_YEAST	AAT2	Aspartate aminotransferase, cytoplasmic	0	U	R.FYTIEAK.L	16.4128	17.2605	13.5743	89.397	117.463	99.4443	23.5511	19.2167	8.64173	123.922	131.454	120.286
sp|P23542|AATC_YEAST	AAT2	Aspartate aminotransferase, cytoplasmic	0	U	R.FYTIEAK.L	22.4287	16.021	21.4418	233.971	242.317	225.938	18.1959	6.65494	3.57526	248.261	274.59	257.677
sp|P23542|AATC_YEAST	AAT2	Aspartate aminotransferase, cytoplasmic	0	U	R.SEVSNPPAYGAK.I	261.099	272.036	245.216	264.883	292.317	286.735	182.028	185.406	202.061	175.168	180.045	174.234
sp|P23542|AATC_YEAST	AAT2	Aspartate aminotransferase, cytoplasmic	0	U	R.LEETHAVYLVASGR.A	114.06	94.3056	105.445	151.857	106.405	118.625	98.0474	94.6945	113.005	98.9668	86.2512	122.987
sp|P23542|AATC_YEAST	AAT2	Aspartate aminotransferase, cytoplasmic	0	U	K.LIHNDSSYNHEYLGITGLPSLTSNAAK.I	68.1671	51.9261	44.5043	90.7835	76.1547	77.9406	73.5855	71.128	120.443	76.2917	81.9453	117.725
sp|P23542|AATC_YEAST	AAT2	Aspartate aminotransferase, cytoplasmic	0	U	K.IIFGTQSDAFQEDR.V	114.938	126.523	113.66	114.153	123.291	132.352	118.86	118.478	108.477	101.488	97.8569	106.642
sp|P23542|AATC_YEAST	AAT2	Aspartate aminotransferase, cytoplasmic	0	U	K.NHIALFDTAYQGFATGDLDK.D	40.9069	40.1938	39.2281	51.8421	60.4476	53.9653	53.5786	52.1932	45.7271	47.0525	39.8454	52.8213
sp|P23542|AATC_YEAST	AAT2	Aspartate aminotransferase, cytoplasmic	0	U	K.AIDEVVR.F	282.13	272.615	293.203	320.713	332.639	325.45	373.017	357.432	335.906	260.403	324.909	301.404
sp|P23542|AATC_YEAST	AAT2	Aspartate aminotransferase, cytoplasmic	0	U	K.NAGMYGER.V	24.3769	17.7893	16.932	23.3045	19.4225	14.3234	27.9651	25.5592	22.9521	17.233	17.3838	22.2931
sp|P23542|AATC_YEAST	AAT2	Aspartate aminotransferase, cytoplasmic	0	U	R.ASIAGLNQGNVEYVAK.A	29.0503	24.1073	34.3827	38.6508	38.2052	34.5759	36.0708	37.7283	29.1761	27.5624	36.3164	30.2273
sp|P23542|AATC_YEAST	AAT2	Aspartate aminotransferase, cytoplasmic	0	U	K.TATYPYWANETK.S	721.491	690.061	661.269	854.59	833.346	856.529	793.598	798.513	763.392	760.861	777.818	772.413
sp|P23542|AATC_YEAST	AAT2	Aspartate aminotransferase, cytoplasmic	0	U	K.TATYPYWANETK.S	9.83293	9.49621	10.7426	9.23925	11.5102	12.5018	11.7596	9.17806	12.7797	10.8436	14.8408	10.1742
sp|P32783|MCES_YEAST	ABD1	mRNA cap guanine-N7 methyltransferase	0	U	K.VTFENNSYQK.N	18.8448	13.8622	16.2667	20.4195	18.0285	14.4325	24.3776	24.4655	22.337	15.8536	17.9253	24.18
sp|P32783|MCES_YEAST	ABD1	mRNA cap guanine-N7 methyltransferase	0	U	K.IGGHFFGTIPDSEFIR.Y	11.0222	12.0716	10.8951	13.4586	14.7036	13.0949	23.097	22.3625	20.2117	14.7708	22.5607	20.729
sp|P32783|MCES_YEAST	ABD1	mRNA cap guanine-N7 methyltransferase	0	U	K.IGGHFFGTIPDSEFIR.Y	59.4901	63.8051	71.9173	52.0258	70.2766	76.7179	75.0146	75.6725	59.4721	57.1691	67.8318	61.0588
sp|P32783|MCES_YEAST	ABD1	mRNA cap guanine-N7 methyltransferase	0	U	K.VTANAPGDGNGSLPVLQSSSILTSK.V	21.9293	17.1422	20.7759	140.341	128.11	143.497	25.0271	25.609	21.8939	275.051	267.533	281.103
sp|P32783|MCES_YEAST	ABD1	mRNA cap guanine-N7 methyltransferase	0	U	K.FFVQEIPK.W	166.821	168.306	166.962	189.817	203.998	173.665	377.135	381.378	383.957	337.024	321.769	318.759
sp|P32783|MCES_YEAST	ABD1	mRNA cap guanine-N7 methyltransferase	0	U	R.ALLNVAK.S	159.931	167.173	166.589	142.482	154.881	160.659	215.639	217.869	199.181	183.241	173.298	181.708
sp|P32783|MCES_YEAST	ABD1	mRNA cap guanine-N7 methyltransferase	0	U	K.FFVQEIPK.W	104.834	110.266	92.7403	94.6756	116.641	104.946	194.612	198.544	182.919	161.299	163.128	150.91
sp|P32783|MCES_YEAST	ABD1	mRNA cap guanine-N7 methyltransferase	0	U	K.IGGHFFGTIPDSEFIR.Y	56.315	52.5034	53.1315	48.9177	59.607	57.1915	67.2523	61.411	52.4896	59.5644	56.876	63.3706
sp|P32783|MCES_YEAST	ABD1	mRNA cap guanine-N7 methyltransferase	0	U	R.YGVEGDEK.E	61.351	73.6776	68.0525	59.0773	78.8086	67.2058	127.987	123.999	115.236	100.248	107.136	91.5265
sp|P32783|MCES_YEAST	ABD1	mRNA cap guanine-N7 methyltransferase	0	U	R.SINVDQIVR.E	25.3525	23.7628	26.8718	29.6143	28.819	24.9988	34.4268	26.9034	28.2201	24.9065	21.526	29.6261
sp|P14164|ABF1_YEAST	ABF1	ARS-binding factor 1	0	U	K.VSHYVEESGLLDILMQR.Y	28.6561	40.8332	29.3962	31.9119	38.9987	39.9984	63.3863	77.7278	66.4353	61.6013	57.2209	66.2256
sp|P14164|ABF1_YEAST	ABF1	ARS-binding factor 1	0	U	K.VSHYVEESGLLDILMQR.Y	22.4946	22.0344	27.0087	26.6715	28.5326	32.4423	44.7436	44.1265	39.7686	44.0133	43.8785	45.4226
sp|P14164|ABF1_YEAST	ABF1	ARS-binding factor 1	0	U	K.LDFVTDDLEYHLANTHPDDTNDK.V	9.70076	10.7259	11.8596	14.7941	15.5389	12.7491	20.6654	28.3234	22.3975	33.1455	20.6057	25.7673
sp|P14164|ABF1_YEAST	ABF1	ARS-binding factor 1	0	U	K.LPHEVAEQLR.L	199.914	233.758	229.666	213.318	271.068	266.756	431.197	439.408	373.752	518.687	495.647	439.174
sp|P14164|ABF1_YEAST	ABF1	ARS-binding factor 1	0	U	K.NYSDVVNDEDINVAIANAVANVDSQSNNK.H	13.966	24.8242	25.2575	26.4559	25.912	33.619	52.296	60.3533	55.4853	57.8389	57.4115	54.0055
sp|P14164|ABF1_YEAST	ABF1	ARS-binding factor 1	0	U	K.NYSDVVNDEDINVAIANAVANVDSQSNNK.H	25.8639	24.895	25.201	32.8768	32.4197	42.3159	84.5879	80.9511	76.5248	74.7777	85.8053	85.0726
sp|P14164|ABF1_YEAST	ABF1	ARS-binding factor 1	0	U	R.SNSIDYAK.H	57.6485	62.1667	55.9167	61.796	74.0582	59.8076	107.129	101.017	95.7304	105.527	123.984	116.458
sp|P14164|ABF1_YEAST	ABF1	ARS-binding factor 1	0	U	R.YGLTAEDFEK.R	88.0968	82.7871	84.5256	110.916	103.624	97.1387	136.569	130.999	112.359	125.146	136.542	133.824
sp|P14164|ABF1_YEAST	ABF1	ARS-binding factor 1	0	U	K.LVVNYYEYK.H	26.7093	25.8992	31.7519	29.7386	29.962	35.5571	51.4169	57.1858	51.5606	59.5346	60.2341	51.8208
sp|P14164|ABF1_YEAST	ABF1	ARS-binding factor 1	0	U	K.IEPYHSHPLEDNLSLGK.F	74.4541	70.1563	69.3664	78.8753	74.897	80.2027	115.953	111.347	138.972	129.121	126.345	135.912
sp|P14164|ABF1_YEAST	ABF1	ARS-binding factor 1	0	U	R.SNEVNGNNDDDADANNIFK.Q	10.6249	10.7975	12.3466	19.5786	12.1429	13.0451	26.5588	27.3916	29.9109	37.181	33.8174	32.0637
sp|P14164|ABF1_YEAST	ABF1	ARS-binding factor 1	0	U	K.IEPYHSHPLEDNLSLGK.F	183.607	150.08	148.35	191.378	192.468	175.695	246.365	249.542	269.724	271.291	261.852	288.521
sp|P14164|ABF1_YEAST	ABF1	ARS-binding factor 1	0	U	K.IEPYHSHPLEDNLSLGK.F	16.671	18.9289	19.6567	20.1303	20.5318	17.2553	30.5439	25.128	26.7004	27.6552	36.7565	37.4641
sp|P14164|ABF1_YEAST	ABF1	ARS-binding factor 1	0	U	R.LLSQIAR.R	107.091	127.826	122.762	96.0014	119.925	109.287	192.618	186.371	171.225	178.764	183.538	187.405
sp|P14164|ABF1_YEAST	ABF1	ARS-binding factor 1	0	U	K.LPHEVAEQLR.L	251.886	276.416	266.691	265.966	301.345	303.808	482.559	518.474	433.234	548.473	546.235	493.982
sp|P14164|ABF1_YEAST	ABF1	ARS-binding factor 1	0	U	R.YGLTAEDFEK.R	18.388	13.4086	13.5209	14.7094	14.0205	18.6692	23.4095	18.7533	19.2925	22.0383	26.6474	22.2283
sp|P14164|ABF1_YEAST	ABF1	ARS-binding factor 1	0	U	R.SNEVNGNNDDDADANNIFK.Q	14.8394	19.8654	12.9896	28.0456	23.3779	26.8243	42.8153	41.0333	35.512	50.3885	50.4406	44.7562
sp|P14164|ABF1_YEAST	ABF1	ARS-binding factor 1	0	U	K.HQEISSAGTSSNTTK.N	25.3051	18.5104	17.9459	32.3137	24.6866	25.0985	39.1137	40.2787	43.2777	40.477	46.9907	47.1174
sp|P14164|ABF1_YEAST	ABF1	ARS-binding factor 1	0	U	K.LDFVTDDLEYHLANTHPDDTNDK.V	52.0524	44.3217	39.9339	65.3487	58.086	55.7163	82.56	81.8016	99.0226	91.3203	102.767	93.5442
sp|P14164|ABF1_YEAST	ABF1	ARS-binding factor 1	0	U	K.VSHYVEESGLLDILMQR.Y	11.9373	15.7891	16.8886	18.6613	16.404	13.5628	31.8003	21.7473	23.1037	22.1009	27.0237	30.4952
sp|P14164|ABF1_YEAST	ABF1	ARS-binding factor 1	0	U	R.ETAQLAIDK.I	194.402	189.725	214.859	223.815	246.409	250.715	356.146	351.75	369.344	403.239	455.067	396.858
sp|P14164|ABF1_YEAST	ABF1	ARS-binding factor 1	0	U	R.HNEEDDVHTQMTK.N	84.293	87.4798	89.521	127.053	139.91	146.901	368.107	388.618	363.039	402.018	382.463	413.166
sp|P14164|ABF1_YEAST	ABF1	ARS-binding factor 1	0	U	K.DLAIGAHGGK.K	49.4812	53.9999	49.6724	51.7235	64.887	53.0368	75.0373	71.3305	74.054	87.5095	93.027	80.0317
sp|P14164|ABF1_YEAST	ABF1	ARS-binding factor 1	0	U	K.NDSNDDNNGNNNNDASNLMESVLDK.T	11.2774	7.92567	10.2346	9.62504	11.5317	11.9416	10.5153	11.8314	14.9399	17.9849	15.0401	15.4588
sp|P14164|ABF1_YEAST	ABF1	ARS-binding factor 1	0	U	R.NEDDKLPHEVAEQLR.L	79.9255	72.7701	72.7228	148.977	99.8361	105.345	158.412	131.391	172.429	159.391	174.658	231.476
sp|Q02486|ABF2_YEAST	ABF2	ARS-binding factor 2, mitochondrial	0	U	K.AIQEYNAR.Y	214.791	212.292	207.278	288.257	241.935	225.815	144.068	137.328	148.529	169.365	172.542	183.759
sp|Q02486|ABF2_YEAST	ABF2	ARS-binding factor 2, mitochondrial	0	U	K.SQLDLMK.I	25.1144	19.573	19.2422	31.2179	21.45	30.8038	21.1823	29.3445	19.9652	24.9343	21.6418	20.6902
sp|Q02486|ABF2_YEAST	ABF2	ARS-binding factor 2, mitochondrial	0	U	R.SQVFAQHPDK.S	380.969	456.094	457.717	448.708	465.937	444.392	284.885	312.941	334.028	387.037	395.688	382.532
sp|Q02486|ABF2_YEAST	ABF2	ARS-binding factor 2, mitochondrial	0	U	K.AIQEYNAR.Y	35.7682	44.3624	39.259	50.9858	41.2509	41.4413	24.4055	22.2583	26.9313	23.7641	22.2106	26.532
sp|Q02486|ABF2_YEAST	ABF2	ARS-binding factor 2, mitochondrial	0	U	K.RPTSAYFLYLQDHR.S	94.2096	70.4479	74.6836	112.711	82.982	85.4699	40.1843	40.4326	51.4908	52.2944	63.8959	65.4386
sp|Q02486|ABF2_YEAST	ABF2	ARS-binding factor 2, mitochondrial	0	U	K.SQLDLMK.I	10.8906	12.2762	20.4492	20.4505	12.8332	16.1505	13.4041	12.5032	11.9769	19.2612	16.8973	17.5921
sp|Q02486|ABF2_YEAST	ABF2	ARS-binding factor 2, mitochondrial	0	U	K.WQSLDQSIK.D	150.775	152.305	151.661	198.512	160.301	155.983	101.18	104.183	93.5121	107.67	111.895	100.122
sp|Q02486|ABF2_YEAST	ABF2	ARS-binding factor 2, mitochondrial	0	U	K.WQSLDQSIK.D	72.8463	75.8067	72.438	112.244	89.2347	76.4685	57.2952	46.6502	55.7546	66.2265	62.6165	65.7887
sp|Q02486|ABF2_YEAST	ABF2	ARS-binding factor 2, mitochondrial	0	U	K.WQSLDQSIK.D	33.1438	38.871	40.001	44.6976	39.2551	41.6909	29.3372	20.8805	23.3104	38.7223	29.1607	34.9633
sp|Q02486|ABF2_YEAST	ABF2	ARS-binding factor 2, mitochondrial	0	U	K.WQSLDQSIK.D	38.9289	42.5906	41.4401	55.5211	50.6	49.3275	28.0156	30.5059	32.0305	26.7903	26.704	35.2129
sp|Q02486|ABF2_YEAST	ABF2	ARS-binding factor 2, mitochondrial	0	U	K.WQSLDQSIK.D	115.564	111.385	127.312	161.156	136.689	137.457	70.9293	76.4785	80.5143	101.187	101.09	86.7828
sp|Q02486|ABF2_YEAST	ABF2	ARS-binding factor 2, mitochondrial	0	U	K.WQSLDQSIK.D	101.579	101.663	102.799	133.553	120	121.302	72.5454	72.36	68.2424	82.6667	83.4417	89.5387
sp|Q02486|ABF2_YEAST	ABF2	ARS-binding factor 2, mitochondrial	0	U	K.ENPTLRPAEISK.I	40.5786	45.5401	36.7648	47.7436	48.5065	51.9804	28.5578	24.5277	22.7882	32.0272	29.0218	30.5599
sp|Q02486|ABF2_YEAST	ABF2	ARS-binding factor 2, mitochondrial	0	U	K.WQSLDQSIK.D	81.6554	79.053	90.8064	127.277	104.743	114.418	74.3001	60.6148	59.6037	80.0204	81.1308	74.9871
sp|Q02486|ABF2_YEAST	ABF2	ARS-binding factor 2, mitochondrial	0	U	R.SQVFAQHPDK.S	292.429	299.558	274.205	322.292	310.183	309.366	199.798	205.605	208.97	242.049	238.829	260.443
sp|Q02486|ABF2_YEAST	ABF2	ARS-binding factor 2, mitochondrial	0	U	K.WQNLEADIK.E	112.386	113.598	100.119	112.555	112.936	118.621	76.4303	69.0087	68.7709	104.464	97.4872	93.1909
sp|Q02486|ABF2_YEAST	ABF2	ARS-binding factor 2, mitochondrial	0	U	K.WQSLDQSIK.D	32.0224	31.9423	33.2555	38.8955	36.5026	31.6359	23.4413	19.8812	22.8131	23.7686	28.6082	24.7322
sp|Q02486|ABF2_YEAST	ABF2	ARS-binding factor 2, mitochondrial	0	U	K.RPTSAYFLYLQDHR.S	124.413	94.2471	108.964	153.837	112.426	125.373	75.8691	72.4641	86.7033	80.6706	92.8062	112.836
sp|Q02486|ABF2_YEAST	ABF2	ARS-binding factor 2, mitochondrial	0	U	R.SQVFAQHPDK.S	36.0419	36.0719	39.0997	34.0992	39.7566	40.2247	20.9465	22.9501	22.2644	29.8784	31.2762	30.2262
sp|Q02486|ABF2_YEAST	ABF2	ARS-binding factor 2, mitochondrial	0	U	K.WQNLEADIK.E	586.889	567.545	582.843	762.482	758.394	802.062	300.938	317.206	308.34	380.252	393.597	376.13
sp|Q02486|ABF2_YEAST	ABF2	ARS-binding factor 2, mitochondrial	0	U	K.RPTSAYFLYLQDHR.S	583.091	454.1	471.882	709.324	559.436	568.986	273.164	205.744	344.553	259.887	333.607	418.542
sp|Q02486|ABF2_YEAST	ABF2	ARS-binding factor 2, mitochondrial	0	U	K.SQLDLMK.I	1102.08	1162.63	1133.45	1558.13	1308.34	1337.02	790.736	775.135	810.982	999.873	1025.76	993.59
sp|P15891|ABP1_YEAST	ABP1	Actin-binding protein	0	U	K.FEGLAASEK.E	137.893	145.585	150.496	258.996	267.802	283.698	138.471	145.718	149.087	190.238	199.617	186.994
sp|P15891|ABP1_YEAST	ABP1	Actin-binding protein	0	U	R.NSIPAPK.Q	69.6165	74.6428	74.6517	126.888	131.925	130.717	75.8429	72.0755	73.999	84.8867	101.015	93.4741
sp|P15891|ABP1_YEAST	ABP1	Actin-binding protein	0	U	R.YSIQTSSK.Q	222.899	215.155	230.413	307.919	323.759	329.647	253.412	263.777	283.787	336.043	351.787	334.025
sp|P15891|ABP1_YEAST	ABP1	Actin-binding protein	0	U	R.EIDAEYLK.I	60.7765	59.005	54.0377	87.7416	100.138	81.4726	71.6886	78.9593	75.1313	79.6531	83.1856	92.9358
sp|P15891|ABP1_YEAST	ABP1	Actin-binding protein	0	U	K.ERDFDQAPLK.P	98.979	112.008	97.4121	88.1297	120.316	132.417	94.6436	118.686	76.4715	89.2228	69.3123	67.2951
sp|P15891|ABP1_YEAST	ABP1	Actin-binding protein	0	U	K.GYHVQVTAR.D	109.246	122.259	106.38	200.989	199.604	187.674	131.12	147.812	146.473	185.117	183.654	181.399
sp|P15891|ABP1_YEAST	ABP1	Actin-binding protein	0	U	R.DSEFNSFLGTTKPPSM*TESSLK.N	27.4116	26.2553	33.3023	70.3501	54.2121	57.3877	31.8409	35.4827	36.6662	38.1877	46.2987	50.4639
sp|P15891|ABP1_YEAST	ABP1	Actin-binding protein	0	U	K.RDSEFNSFLGTTKPPSMTESSLK.N	60.1409	46.3113	46.8941	82.454	89.4358	74.2065	54.1415	56.2625	67.9957	69.7452	66.1318	62.0239
sp|P15891|ABP1_YEAST	ABP1	Actin-binding protein	0	U	R.ASFAANFAAVANNLFK.G	20.55	15.6649	16.588	15.0826	19.2737	15.1156	10.9185	14.5233	8.21216	14.583	17.3415	18.7877
sp|P15891|ABP1_YEAST	ABP1	Actin-binding protein	0	U	K.EEEEM*ENK.F	165.864	145.735	164.101	373.533	375.145	372.859	158.963	174.03	204.56	253.827	275.93	247.597
sp|P15891|ABP1_YEAST	ABP1	Actin-binding protein	0	U	K.EEEEMENK.F	20.3843	14.0923	22.9077	51.6141	55.2711	53.2873	27.1107	29.2436	32.6773	40.5601	36.9943	40.5391
sp|P15891|ABP1_YEAST	ABP1	Actin-binding protein	0	U	K.EEEEMENK.F	21.8351	19.9929	22.1835	57.03	57.9489	58.7288	23.4591	27.9749	26.9219	41.6284	48.0193	34.1135
sp|P15891|ABP1_YEAST	ABP1	Actin-binding protein	0	U	K.PEVPEDEPEGEPDVK.D	31.8056	18.8266	26.4325	51.7907	52.6789	62.1121	26.3413	28.399	26.2401	45.5527	49.745	47.1954
sp|P15891|ABP1_YEAST	ABP1	Actin-binding protein	0	U	K.VQYGLAR.V	62.8055	63.0058	61.9512	94.6308	101.561	88.9081	71.3531	68.4245	71.2926	72.3282	84.3286	76.2344
sp|P15891|ABP1_YEAST	ABP1	Actin-binding protein	0	U	R.VSPPGSDVEK.I	36.2394	38.3835	26.377	65.9688	65.4136	52.1228	36.1385	32.9811	36.7332	43.1421	36.7708	35.737
sp|P15891|ABP1_YEAST	ABP1	Actin-binding protein	0	U	R.VSPPGSDVEK.I	73.7555	66.6121	62.4172	107.566	106.082	104.367	59.4621	67.5273	64.1489	82.1485	75.3587	65.7425
sp|P15891|ABP1_YEAST	ABP1	Actin-binding protein	0	U	K.AEEAEQPK.T	2.41881	3.05856	5.99051	443.02	437.765	460.413	0	0	0	292.597	242.297	270.829
sp|P15891|ABP1_YEAST	ABP1	Actin-binding protein	0	U	K.TPSPAPAAK.I	49.5617	45.4714	44.8208	274.425	285.608	292.361	296.811	293.435	296.928	435.097	421.382	406.689
sp|P15891|ABP1_YEAST	ABP1	Actin-binding protein	0	U	K.AEEAEQPK.T	0.00360627	2.2365	0	22.8041	26.405	35.0611	0	0	1.97643	21.406	20.0672	15.8435
sp|P15891|ABP1_YEAST	ABP1	Actin-binding protein	0	U	K.IDPSSDIANLK.N	217.204	188.711	212.795	342.133	362.406	332.767	196.326	217.71	219.175	290.046	266.749	255.163
sp|P15891|ABP1_YEAST	ABP1	Actin-binding protein	0	U	R.VNDNNDDDDWNEPELK.E	20.6654	16.3326	19.6242	35.3096	24.2952	29.6904	20.5364	23.8079	19.6441	29.5467	24.9191	27.4688
sp|P15891|ABP1_YEAST	ABP1	Actin-binding protein	0	U	K.AEAPKPEVPEDEPEGEPDVK.D	31.5698	31.6124	38.1993	67.1106	69.1456	62.8116	32.2951	30.7371	46.8831	50.0719	46.6762	46.4514
sp|P15891|ABP1_YEAST	ABP1	Actin-binding protein	0	U	K.AEAPKPEVPEDEPEGEPDVK.D	131.938	127.939	160.415	276.037	304.988	262.071	159.539	136.447	159.006	205.697	224.149	181.911
sp|P15891|ABP1_YEAST	ABP1	Actin-binding protein	0	U	R.NVASGAPVQK.E	48.3722	44.2471	50.2167	94.7715	93.2865	102.835	42.0011	42.5524	40.8902	52.3601	62.0814	59.8584
sp|P15891|ABP1_YEAST	ABP1	Actin-binding protein	0	U	K.SEPTIISPK.P	22.7598	24.2394	35.6814	64.7411	76.8029	61.2699	25.2947	30.625	35.2236	49.0827	39.8445	37.0147
sp|P15891|ABP1_YEAST	ABP1	Actin-binding protein	0	U	K.AEAPKPEVPEDEPEGEPDVK.D	9.44393	10.2069	10.0932	33.5462	24.6117	25.6822	10.0012	12.6242	12.2665	20.4088	19.664	14.2867
sp|P15891|ABP1_YEAST	ABP1	Actin-binding protein	0	U	R.DSEFNSFLGTTKPPSMTESSLK.N	3.57305	7.29577	7.66399	22.14	18.8187	17.9752	10.0846	7.11038	7.90118	11.0704	15.554	10.9244
sp|P15891|ABP1_YEAST	ABP1	Actin-binding protein	0	U	R.DSEFNSFLGTTKPPSMTESSLK.N	13.1376	16.8281	18.3752	42.9698	40.4252	33.7693	14.8811	14.7901	20.3238	24.2671	25.8893	24.7034
sp|P15891|ABP1_YEAST	ABP1	Actin-binding protein	0	U	K.SPAQLWAER.K	124.573	105.603	117.319	248.008	260.049	240.158	115.331	110.491	117.148	184.334	148.775	170.973
sp|P15891|ABP1_YEAST	ABP1	Actin-binding protein	0	U	K.AEAPKPEVPEDEPEGEPDVK.D	15.5866	21.4251	15.1314	33.1157	34.8763	34.8709	14.6942	16.8126	17.1063	23.7916	20.6219	21.5566
sp|P15891|ABP1_YEAST	ABP1	Actin-binding protein	0	U	K.AEAPKPEVPEDEPEGEPDVK.D	84.2711	72.6444	77.4384	162.796	171.67	161.44	72.3537	77.6455	71.1226	116.337	101.385	101.466
sp|P15891|ABP1_YEAST	ABP1	Actin-binding protein	0	U	R.NVASGAPVQK.E	560.509	530.097	546.287	1100.77	1091.15	1109.29	428.999	437.404	434.344	594.246	633.637	630.678
sp|P15891|ABP1_YEAST	ABP1	Actin-binding protein	0	U	K.SEPTIISPK.P	135.453	131.357	151.957	323.847	359.857	348.721	145.295	153.475	169.625	226.626	210.915	203.708
sp|P15891|ABP1_YEAST	ABP1	Actin-binding protein	0	U	K.GYHVQVTAR.D	90.5375	91.4844	106.871	180.294	158.556	157.737	134.371	130.345	118.377	161.652	176.096	160.422
sp|P15891|ABP1_YEAST	ABP1	Actin-binding protein	0	U	R.YSIQTSSK.Q	107.264	95.0389	102.587	145.797	139.149	140.027	115.767	110.724	117.079	143.794	151.364	167.559
sp|P15891|ABP1_YEAST	ABP1	Actin-binding protein	0	U	R.VSPPGSDVEK.I	206.916	170.899	215.634	295.859	295.436	254.697	160.28	175.015	158.41	205.654	189.734	198.734
sp|P15891|ABP1_YEAST	ABP1	Actin-binding protein	0	U	K.EEEEMENK.F	479.788	512.172	507.197	1179.58	1130.45	1236.86	560.015	609.855	578.561	860.803	834.358	812.351
sp|P15891|ABP1_YEAST	ABP1	Actin-binding protein	0	U	K.EEPEQEEIAPSLPSR.N	13.3233	7.458	12.1102	22.6497	18.9527	21.9682	10.0098	7.05842	9.90085	9.16013	9.33966	9.59044
sp|P15891|ABP1_YEAST	ABP1	Actin-binding protein	0	U	R.VSPPGSDVEK.I	51.3392	51.461	56.6555	83.6141	88.5633	72.7432	47.2449	51.7467	45.892	63.0898	70.0334	67.2382
sp|P15891|ABP1_YEAST	ABP1	Actin-binding protein	0	U	R.DFDQAPLKPNQSSYKPIGK.I	78.2389	51.3473	75.888	236.661	147.642	157.28	71.7039	52.4659	100.742	92.0421	119.144	142.174
sp|P15891|ABP1_YEAST	ABP1	Actin-binding protein	0	U	K.IDPSSDIANLK.N	425.757	428.035	395.665	698.726	717.51	752.349	392.819	436.068	404.646	558.22	519.313	530.136
sp|P15891|ABP1_YEAST	ABP1	Actin-binding protein	0	U	K.TPSPAPAAK.I	52.6632	52.2089	60.7203	290.713	307.013	332.469	321.722	334.949	334.622	485.264	490.675	469.313
sp|P15891|ABP1_YEAST	ABP1	Actin-binding protein	0	U	R.EIDAEYLK.I	163.092	158.572	143.871	287.411	263.873	231.504	180.358	223.796	195.272	255.099	214.444	250.857
sp|P15891|ABP1_YEAST	ABP1	Actin-binding protein	0	U	K.QNSGNAETK.A	63.2815	56.4014	62.6578	133.16	123.773	129.241	55.345	60.1791	65.2681	79.5775	94.4589	82.2636
sp|P15891|ABP1_YEAST	ABP1	Actin-binding protein	0	U	K.AEAPKPEVPEDEPEGEPDVK.D	26.7855	27.8314	24.6293	63.3884	55.3166	67.1718	23.2792	33.304	34.5821	42.5822	43.3578	37.3326
sp|P15891|ABP1_YEAST	ABP1	Actin-binding protein	0	U	K.AEAPKPEVPEDEPEGEPDVK.D	16.4986	22.0371	22.6607	44.8855	44.4307	41.2978	18.6995	22.5696	17.2171	28.9599	30.7538	32.1041
sp|Q08641|AB140_YEAST	ABP140	tRNA(Thr) (cytosine(32)-N(3))-methyltransferase	0	U	K.GENADINVNDFQEYK.E	76.4122	91.535	76.6504	114.512	137.721	131.173	235.895	239.8	248.369	296.623	322.62	269.476
sp|Q08641|AB140_YEAST	ABP140	tRNA(Thr) (cytosine(32)-N(3))-methyltransferase	0	U	R.NGNVNTNANVDDSTK.T	40.4609	46.9841	50.733	41.1265	41.1554	42.2364	59.228	60.7957	50.9889	70.675	67.5506	57.6309
sp|Q08641|AB140_YEAST	ABP140	tRNA(Thr) (cytosine(32)-N(3))-methyltransferase	0	U	K.GENADINVNDFQEYK.E	36.4939	30.7849	30.9534	50.9678	50.5767	57.5425	72.9315	79.6971	92.5286	102.322	105.804	111.947
sp|Q08641|AB140_YEAST	ABP140	tRNA(Thr) (cytosine(32)-N(3))-methyltransferase	0	U	K.GENADINVNDFQEYK.E	35.2216	31.9701	35.1956	48.8188	53.6057	48.9053	94.4798	93.3266	109.269	91.8087	99.4026	93.0327
sp|Q08641|AB140_YEAST	ABP140	tRNA(Thr) (cytosine(32)-N(3))-methyltransferase	0	U	R.DLPFEFGK.R	8.44965	8.78293	12.0249	16.9926	10.4566	13.8913	20.9107	18.9372	16.5814	28.0981	24.8434	27.6662
sp|Q08641|AB140_YEAST	ABP140	tRNA(Thr) (cytosine(32)-N(3))-methyltransferase	0	U	R.DLPFEFGK.R	9.45829	9.96736	10.1556	13.5197	18.0321	18.4118	29.6135	31.6711	23.2851	37.4326	34.0596	24.0638
sp|Q08641|AB140_YEAST	ABP140	tRNA(Thr) (cytosine(32)-N(3))-methyltransferase	0	U	K.EETLENIAHEGR.G	56.6574	49.154	46.9781	92.231	90.3335	90.5338	144.389	130.52	132.533	172.23	165.598	160.969
sp|Q08641|AB140_YEAST	ABP140	tRNA(Thr) (cytosine(32)-N(3))-methyltransferase	0	U	K.DNENENLR.I	5.29389	4.30785	3.05663	5.77309	10.3317	4.95735	14.6159	17.6621	17.2851	21.1462	20.725	16.7055
sp|Q08641|AB140_YEAST	ABP140	tRNA(Thr) (cytosine(32)-N(3))-methyltransferase	0	U	K.NSEQFNPK.Y	58.8799	57.4835	55.4281	72.0962	68.7595	83.1097	102.243	113.643	92.2244	130.704	135.835	132.673
sp|Q08641|AB140_YEAST	ABP140	tRNA(Thr) (cytosine(32)-N(3))-methyltransferase	0	U	K.ETENAENASQQANDGSTSTTTSK.N	13.7411	4.73809	14.3157	11.4475	15.6158	16.9791	18.7198	17.9915	22.4944	20.9499	23.2469	19.3646
sp|Q08641|AB140_YEAST	ABP140	tRNA(Thr) (cytosine(32)-N(3))-methyltransferase	0	U	K.ETENAENASQQANDGSTSTTTSK.N	35.0819	31.7569	32.7475	40.2475	38.6518	48.0406	64.4338	57.43	54.589	74.6652	73.7064	68.1242
sp|Q08641|AB140_YEAST	ABP140	tRNA(Thr) (cytosine(32)-N(3))-methyltransferase	0	U	R.YWDIFYK.N	59.4832	54.4305	59.362	72.1057	66.5146	85.8836	89.4163	84.5231	98.5602	109.089	120.201	102.983
sp|Q08641|AB140_YEAST	ABP140	tRNA(Thr) (cytosine(32)-N(3))-methyltransferase	0	U	K.EETLENIAHEGR.G	4.08057	6.23908	4.37859	7.73141	9.81182	10.2066	14.3284	12.7144	10.1482	16.41	21.2399	16.2039
sp|Q08641|AB140_YEAST	ABP140	tRNA(Thr) (cytosine(32)-N(3))-methyltransferase	0	U	K.ETENAENASQQANDGSTSTTTSK.N	50.7209	53.5109	47.7091	72.8377	71.5597	77.1496	91.9772	106.846	93.3936	113.968	114.928	114.688
sp|Q08641|AB140_YEAST	ABP140	tRNA(Thr) (cytosine(32)-N(3))-methyltransferase	0	U	K.HPVPEFDK.K	28.7381	21.3385	30.1946	49.1749	46.2792	45.4018	66.0756	73.785	67.5191	85.0491	88.2456	70.6221
sp|Q08641|AB140_YEAST	ABP140	tRNA(Thr) (cytosine(32)-N(3))-methyltransferase	0	U	R.DYGAYDLTQVR.F	61.0091	71.3333	74.5913	106.042	124.55	98.8764	126.165	135.466	123.722	157.013	166.633	151.072
sp|Q08641|AB140_YEAST	ABP140	tRNA(Thr) (cytosine(32)-N(3))-methyltransferase	0	U	K.NSEQFNPK.Y	123.652	107.054	104.548	165.303	156.394	153.844	224.607	210.191	202.618	273.04	285.745	262.684
sp|Q08641|AB140_YEAST	ABP140	tRNA(Thr) (cytosine(32)-N(3))-methyltransferase	0	U	R.DLPFEFGK.R	47.3509	49.3191	51.6287	73.4579	69.7122	68.4502	101.626	94.0348	96.6941	119.497	119.086	124.266
sp|Q08641|AB140_YEAST	ABP140	tRNA(Thr) (cytosine(32)-N(3))-methyltransferase	0	U	R.DYGAYDLTQVR.F	15.8316	14.7143	8.88919	14.8296	22.1829	21.9033	19.2458	25.2932	21.3469	33.3053	27.6632	26.7674
sp|Q08641|AB140_YEAST	ABP140	tRNA(Thr) (cytosine(32)-N(3))-methyltransferase	0	U	R.IIAADFAPR.A	100.26	96.4385	85.816	139.353	140.308	140.186	376.496	350.863	352.116	429.957	442.741	430.306
sp|P37254|ADCS_YEAST	ABZ1	Aminodeoxychorismate synthase	0	U	K.HSLPPGSMTGAPK.K	116.305	105.94	113.051	140.85	139.632	130.763	142.226	150.647	149.829	129.091	123.494	125.541
sp|P37254|ADCS_YEAST	ABZ1	Aminodeoxychorismate synthase	0	U	K.LSFINNVK.T	46.5431	52.7174	51.9477	67.2079	63.5541	56.7757	63.101	74.9586	64.9754	59.6747	66.7771	64.6205
sp|P37254|ADCS_YEAST	ABZ1	Aminodeoxychorismate synthase	0	U	K.SQFWITLGK.F	76.1143	77.6982	81.5485	95.8349	92.3983	99.2657	122.237	125.178	120.977	104.327	126.726	97.7177
sp|P37254|ADCS_YEAST	ABZ1	Aminodeoxychorismate synthase	0	U	R.NDLYELVPDVR.V	17.3138	15.6638	12.8239	13.4336	16.2643	19.6285	20.8389	24.4752	11.2358	17.5786	14.11	12.7209
sp|P37254|ADCS_YEAST	ABZ1	Aminodeoxychorismate synthase	0	U	R.IFQTLVQR.N	28.5129	30.0761	26.1964	31.0892	35.0183	38.8548	58.6289	50.8808	47.6166	42.5031	49.9951	61.5691
sp|P37254|ADCS_YEAST	ABZ1	Aminodeoxychorismate synthase	0	U	K.QFEVSEDPK.L	107.253	114.793	121.06	107.43	124.778	115.384	184.669	170.599	164.387	150.219	148.671	135.837
sp|P37254|ADCS_YEAST	ABZ1	Aminodeoxychorismate synthase	0	U	R.NPAPFSSFFEFK.D	9.17336	7.43753	7.47215	12.9906	12.5533	11.5554	11.6436	13.5455	19.1928	7.36056	7.49584	18.4615
sp|P37254|ADCS_YEAST	ABZ1	Aminodeoxychorismate synthase	0	U	K.LSFINNVK.T	138.575	128.445	145.376	138.593	140.43	147.948	191.933	191.604	189.788	143.672	153.576	153.905
sp|Q03266|PABC_YEAST	ABZ2	Aminodeoxychorismate lyase	0	U	R.IALSYFK.I	68.7097	75.1783	65.9143	64.0545	49.0493	70.586	38.248	41.3643	39.9333	36.7672	44.5532	43.2711
sp|Q03266|PABC_YEAST	ABZ2	Aminodeoxychorismate lyase	0	U	R.FFLLDEQYQR.I	51.3364	50.8398	50.5527	35.8765	50.9115	47.2062	29.6375	24.6751	31.3939	25.3706	29.3714	31.6232
sp|Q03266|PABC_YEAST	ABZ2	Aminodeoxychorismate lyase	0	U	R.QQIINEDYSSYLR.V	26.8073	27.8188	31.5245	25.8688	21.4104	22.1503	21.1121	18.0166	18.8249	17.4777	18.3611	11.1597
sp|Q03266|PABC_YEAST	ABZ2	Aminodeoxychorismate lyase	0	U	R.EVNSGGDLLENIQHPDAWK.H	74.4043	66.7702	86.8779	59.033	56.1829	68.4646	38.9607	49.6185	44.0915	47.8291	38.3041	41.0494
sp|Q03266|PABC_YEAST	ABZ2	Aminodeoxychorismate lyase	0	U	R.VEDMLQVIYER.F	99.6145	98.3107	107.521	102.263	112.515	113.679	75.0513	78.9429	107.645	88.097	98.6151	95.2158
sp|Q03266|PABC_YEAST	ABZ2	Aminodeoxychorismate lyase	0	U	K.IDFSTSLNDLLK.L	26.82	29.3483	33.2067	36.2399	32.4452	30.477	12.2455	15.0119	12.299	14.5602	17.594	12.008
sp|Q03266|PABC_YEAST	ABZ2	Aminodeoxychorismate lyase	0	U	K.TDMESYDEGGLVANPNFEVLATFR.Y	7.59931	6.0442	6.71547	9.25136	8.81971	11.0902	12.8485	9.55577	10.7941	14.6229	12.8695	9.1626
sp|Q03266|PABC_YEAST	ABZ2	Aminodeoxychorismate lyase	0	U	K.SGLLMEGSITNVAVIQK.D	50.345	56.866	57.1687	49.9772	50.459	37.2341	44.0831	34.848	33.5147	28.0762	37.0955	36.6602
sp|Q03266|PABC_YEAST	ABZ2	Aminodeoxychorismate lyase	0	U	K.SGLLMEGSITNVAVIQK.D	60.7917	59.3851	55.6512	39.6393	43.6291	46.1117	33.9336	42.4493	30.3528	32.0459	31.8633	39.6483
sp|Q03266|PABC_YEAST	ABZ2	Aminodeoxychorismate lyase	0	U	R.EVNSGGDLLENIQHPDAWK.H	44.7706	34.0258	40.1234	31.6281	37.7843	31.0029	21.5977	24.3667	25.3553	20.5117	25.7987	16.2861
sp|Q03266|PABC_YEAST	ABZ2	Aminodeoxychorismate lyase	0	U	R.EVNSGGDLLENIQHPDAWK.H	56.0832	50.5604	52.9862	35.165	34.6616	39.1665	35.3715	30.233	27.091	27.048	33.5038	24.5562
sp|Q03266|PABC_YEAST	ABZ2	Aminodeoxychorismate lyase	0	U	K.EGNSEYHEK.I	128.521	125.9	118.397	159.978	128.649	120.375	63.118	56.3975	90.9964	64.7186	80.1352	83.5838
sp|Q03266|PABC_YEAST	ABZ2	Aminodeoxychorismate lyase	0	U	R.IALSYFK.I	98.3608	110.718	104.917	86.2576	109.893	101.97	73.1083	70.4798	69.5039	68.6591	74.4176	65.9867
sp|P31787|ACBP_YEAST	ACB1	Acyl-CoA-binding protein	0	U	K.PSTDELLELYALYK.Q	120.295	120.003	141.275	101.584	96.6819	93.6398	67.77	58.6064	61.5624	67.5767	72.106	77.2581
sp|P31787|ACBP_YEAST	ACB1	Acyl-CoA-binding protein	0	U	K.QATVGDNDK.E	12.0974	12.6466	14.0348	13.7344	13.7282	13.4609	10.2182	2.46625	7.07947	2.71452	4.88018	7.04246
sp|P31787|ACBP_YEAST	ACB1	Acyl-CoA-binding protein	0	U	K.WEAWENLK.G	79.7779	99.365	102.977	102.822	114.378	98.5874	37.3402	44.7355	54.4819	43.1619	47.1343	52.7195
sp|P31787|ACBP_YEAST	ACB1	Acyl-CoA-binding protein	0	U	K.WEAWENLK.G	76.2499	61.4533	69.1302	72.1779	66.1798	63.7767	34.541	35.2769	38.147	37.5273	48.0499	50.2773
sp|P31787|ACBP_YEAST	ACB1	Acyl-CoA-binding protein	0	U	K.AVNELPTKPSTDELLELYALYK.Q	153.783	130.103	152.659	196.511	123.437	131.115	76.8074	70.0104	115.611	71.0881	92.0157	132.875
sp|P31787|ACBP_YEAST	ACB1	Acyl-CoA-binding protein	0	U	K.SQEDAEK.E	69.7669	81.5575	84.9132	76.2225	76.8108	77.0572	41.0877	42.2573	41.331	32.0816	40.4781	41.8773
sp|P31787|ACBP_YEAST	ACB1	Acyl-CoA-binding protein	0	U	K.WEAWENLK.G	57.7939	50.7361	55.1487	54.4543	48.599	44.9775	24.7323	22.2275	27.9643	28.6782	27.636	24.6294
sp|P31787|ACBP_YEAST	ACB1	Acyl-CoA-binding protein	0	U	K.WEAWENLK.G	44.7683	50.4966	47.1784	52.9932	48.5581	47.4373	19.3998	26.2609	36.5309	24.8076	23.9953	17.7454
sp|P31787|ACBP_YEAST	ACB1	Acyl-CoA-binding protein	0	U	K.QATVGDNDK.E	164.721	199.334	175.155	205.507	172.256	158.32	77.4946	91.7683	106.34	78.9002	93.2392	110.887
sp|Q00955|ACAC_YEAST	ACC1	Acetyl-CoA carboxylase	0	U	K.LEESPLR.D	94.433	82.7404	90.8281	74.3882	82.8138	72.2093	189.088	203.872	182.03	161.498	139.882	142.91
sp|Q00955|ACAC_YEAST	ACC1	Acetyl-CoA carboxylase	0	U	K.VAYGSSNPK.R	562.242	543.676	536.28	409.349	425.824	442.995	966.787	1006.91	930.31	675.941	635.611	676.533
sp|Q00955|ACAC_YEAST	ACC1	Acetyl-CoA carboxylase	0	U	R.VSSAEIR.I	88.52	92.4551	99.2173	66.2899	73.3703	71.0123	183.108	186.896	163.24	113.256	117.567	116.334
sp|Q00955|ACAC_YEAST	ACC1	Acetyl-CoA carboxylase	0	U	K.VAYGSSNPK.R	27.9435	30.3199	34.5886	32.2724	27.5884	23.7346	50.6629	54.3951	47.472	36.3865	34.6545	41.1121
sp|Q00955|ACAC_YEAST	ACC1	Acetyl-CoA carboxylase	0	U	K.NPEYNPDK.L	19.7136	16.6623	20.3495	16.3645	14.2127	15.9185	32.3581	31.2797	30.4972	25.0298	23.1381	20.1272
sp|Q00955|ACAC_YEAST	ACC1	Acetyl-CoA carboxylase	0	U	K.AETFHEMEK.A	16.9386	15.1376	16.3416	16.1928	17.1396	15.9452	34.541	36.1807	33.5012	23.9544	25.3839	15.9867
sp|Q00955|ACAC_YEAST	ACC1	Acetyl-CoA carboxylase	0	U	R.SWYPASVDHEDDR.Q	21.1771	15.7606	14.7399	20.4336	17.245	20.7728	44.1987	40.2781	52.9495	30.2883	37.4573	43.4016
sp|Q00955|ACAC_YEAST	ACC1	Acetyl-CoA carboxylase	0	U	K.WAYETFGDDR.T	38.3247	48.3474	45.5425	32.0804	33.0858	32.6295	98.4501	91.785	82.9275	69.4949	65.587	57.5703
sp|Q00955|ACAC_YEAST	ACC1	Acetyl-CoA carboxylase	0	U	K.AFLASEEAR.H	12.8517	11.6287	16.2467	10.5888	8.30792	5.94367	27.5044	23.7108	23.7965	12.8933	19.7311	11.3703
sp|Q00955|ACAC_YEAST	ACC1	Acetyl-CoA carboxylase	0	U	K.TEMYTEVK.N	52.4421	47.4704	50.4217	42.9526	46.1816	37.1893	90.1303	92.4271	84.1071	66.7496	56.3658	68.7758
sp|Q00955|ACAC_YEAST	ACC1	Acetyl-CoA carboxylase	0	U	K.TEMYTEVK.N	132.034	145.547	132.736	107.026	103.873	119.6	240.104	253.696	228.314	173.911	176.276	180.876
sp|Q00955|ACAC_YEAST	ACC1	Acetyl-CoA carboxylase	0	U	R.EENIILK.L	160.56	152.517	153.166	126.282	129.398	118.555	252.574	238.345	258.151	189.045	189.497	194.158
sp|Q00955|ACAC_YEAST	ACC1	Acetyl-CoA carboxylase	0	U	R.PIATPYPVK.E	55.5498	53.3719	65.1494	53.6798	53.4869	56.1013	91.6969	79.0127	84.9364	82.5776	65.5656	55.2509
sp|Q00955|ACAC_YEAST	ACC1	Acetyl-CoA carboxylase	0	U	K.QELINASIR.R	23.7934	31.7101	31.8339	32.0532	22.9094	24.2914	57.5201	65.2438	55.4157	43.0864	42.0446	40.0432
sp|Q00955|ACAC_YEAST	ACC1	Acetyl-CoA carboxylase	0	U	R.GSGLIAGATSR.A	187.039	189.622	184.922	135.356	150.817	137.54	372.819	369.421	365.048	266.91	255.808	277.137
sp|Q00955|ACAC_YEAST	ACC1	Acetyl-CoA carboxylase	0	U	K.SHTIYWK.E	62.5283	65.4832	66.0021	52.0857	55.4615	53.9843	87.559	99.7111	79.9932	55.8029	66.0804	56.631
sp|Q00955|ACAC_YEAST	ACC1	Acetyl-CoA carboxylase	0	U	K.ENSVLTER.T	101.525	105.676	103.178	79.1294	85.6849	81.6543	196.339	199.657	193.359	148.715	144.759	152.143
sp|Q00955|ACAC_YEAST	ACC1	Acetyl-CoA carboxylase	0	U	K.HMVVALK.E	238.515	268.1	271.026	223.123	271.992	262.633	482.248	558.817	437.608	412.059	381.381	389.273
sp|Q00955|ACAC_YEAST	ACC1	Acetyl-CoA carboxylase	0	U	K.MLSTDDK.E	82.8937	82.4817	87.5056	93.0301	79.1788	84.0754	381.438	406.481	370.692	275.316	272.952	280.254
sp|Q00955|ACAC_YEAST	ACC1	Acetyl-CoA carboxylase	0	U	K.VIFIGPPGNAM*R.S	31.7111	35.7277	30.3547	42.546	42.2811	38.7572	49.5259	51.4799	37.5272	41.2453	38.647	36.7879
sp|Q00955|ACAC_YEAST	ACC1	Acetyl-CoA carboxylase	0	U	K.NFSADVK.L	81.1252	89.7869	79.2254	69.2773	86.4109	78.8009	168.769	176.757	156.482	130.721	119.391	119.331
sp|Q00955|ACAC_YEAST	ACC1	Acetyl-CoA carboxylase	0	U	K.NFSADVK.L	110.865	104.812	113.255	92.1658	103.293	94.2715	188.387	172.204	184.293	135.467	152.977	152.286
sp|Q00955|ACAC_YEAST	ACC1	Acetyl-CoA carboxylase	0	U	R.QASSSQWK.N	426.877	441.133	437.557	349.496	360.607	404.332	898.882	869.522	931.741	691.006	646.279	651.273
sp|Q00955|ACAC_YEAST	ACC1	Acetyl-CoA carboxylase	0	U	K.SLAPEVHQQISK.Q	275.78	244.552	257.363	279.221	244.775	224.861	513.373	463.646	603.777	410.013	390.203	443.745
sp|Q00955|ACAC_YEAST	ACC1	Acetyl-CoA carboxylase	0	U	K.HM*VVALK.E	31.3985	29.4381	28.6366	43.1856	39.3734	38.0313	42.736	37.5959	35.2774	42.7132	42.9023	28.5546
sp|Q00955|ACAC_YEAST	ACC1	Acetyl-CoA carboxylase	0	U	K.HMVVALK.E	892.53	970.311	1015.43	899.86	951.555	982.359	1914.89	2225.13	1422.76	1518.22	1390.55	1477.21
sp|Q00955|ACAC_YEAST	ACC1	Acetyl-CoA carboxylase	0	U	K.HMVVALK.E	239.479	300.859	265.091	233.012	264.09	255.032	480.692	503.361	423.054	354.037	372.947	367.918
sp|Q00955|ACAC_YEAST	ACC1	Acetyl-CoA carboxylase	0	U	R.GAVFPAR.Q	80.836	85.0234	90.1576	79.8555	62.0064	58.4381	139.009	149.662	140.126	109.252	102.883	107.814
sp|Q00955|ACAC_YEAST	ACC1	Acetyl-CoA carboxylase	0	U	K.LIDM*AVK.N	92.8796	95.6617	82.3798	80.4639	71.38	71.4974	142.742	126.112	141.955	115.121	95.9836	102.35
sp|Q00955|ACAC_YEAST	ACC1	Acetyl-CoA carboxylase	0	U	K.MLSTDDK.E	76.5906	69.2737	63.9669	67.1868	58.7922	44.2677	238.066	212.36	243.48	159.276	163.506	166.089
sp|Q00955|ACAC_YEAST	ACC1	Acetyl-CoA carboxylase	0	U	R.TVINGEER.F	54.6153	45.7818	64.344	38.446	42.4469	34.0742	97.0662	97.0237	94.162	64.9591	83.4198	72.3409
sp|Q00955|ACAC_YEAST	ACC1	Acetyl-CoA carboxylase	0	U	K.AETFHEMEK.A	18.7676	23.1975	17.3165	14.4934	14.4732	18.5766	44.6432	36.9885	39.1042	34.2658	29.8222	32.9113
sp|Q00955|ACAC_YEAST	ACC1	Acetyl-CoA carboxylase	0	U	R.AGVLEPQGMVGIK.F	145.768	154.169	159.551	168.119	193.373	196.888	269.712	257.788	267.887	268.215	255.536	261.798
sp|Q00955|ACAC_YEAST	ACC1	Acetyl-CoA carboxylase	0	U	K.HM*VVALK.E	1305.66	1073.84	1014.1	287.348	564.242	357.115	813.361	1000.82	801.029	624.143	553.872	475.106
sp|Q00955|ACAC_YEAST	ACC1	Acetyl-CoA carboxylase	0	U	K.WAYETFGDDR.T	8.30802	9.3627	7.54264	6.74904	5.6435	6.29512	16.2533	11.4013	12.0276	10.0127	9.11514	10.4724
sp|Q00955|ACAC_YEAST	ACC1	Acetyl-CoA carboxylase	0	U	K.LEESPLR.D	40.9753	38.978	42.347	28.5429	32.601	31.4282	78.758	81.6447	70.2285	52.2725	57.2592	46.2532
sp|Q00955|ACAC_YEAST	ACC1	Acetyl-CoA carboxylase	0	U	R.LSHQVGEASR.L	84.1164	95.4329	93.0052	75.6739	83.766	71.6068	161.884	167.107	181.705	125.14	121.694	133.828
sp|Q00955|ACAC_YEAST	ACC1	Acetyl-CoA carboxylase	0	U	R.SWYPASVDHEDDR.Q	37.1127	29.4423	29.7718	30.4071	23.1572	30.5012	85.0924	65.521	101.972	57.4919	58.9498	73.5447
sp|Q00955|ACAC_YEAST	ACC1	Acetyl-CoA carboxylase	0	U	R.GSGLIAGATSR.A	167.004	164.23	173.183	130.896	137.057	116.271	334.753	335.118	300.25	226.464	212.056	213.411
sp|Q00955|ACAC_YEAST	ACC1	Acetyl-CoA carboxylase	0	U	K.SHTIYWK.E	601.174	635.776	589.572	405.203	464.227	494.635	866.682	1058.16	804.915	628.354	617.032	604.298
sp|Q00955|ACAC_YEAST	ACC1	Acetyl-CoA carboxylase	0	U	K.TEMYTEVK.N	80.8613	85.552	69.8532	60.0385	66.0893	55.0409	158.308	130.913	136.384	92.1822	123.352	110.283
sp|Q00955|ACAC_YEAST	ACC1	Acetyl-CoA carboxylase	0	U	R.PIATPYPVK.E	51.4925	48.3766	51.3692	38.8553	53.3743	48.6452	75.2258	74.2842	73.9032	71.8308	53.1387	51.39
sp|Q00955|ACAC_YEAST	ACC1	Acetyl-CoA carboxylase	0	U	K.SHTIYWK.E	268.685	273.534	313.091	203.558	229.375	234.952	492.316	513.027	438.415	346.118	351.193	349.389
sp|Q00955|ACAC_YEAST	ACC1	Acetyl-CoA carboxylase	0	U	K.SHTIYWK.E	53.4967	63.0737	58.8238	32.2298	44.9851	46.1979	76.8339	81.8635	76.0396	59.8705	59.1839	61.6302
sp|Q00955|ACAC_YEAST	ACC1	Acetyl-CoA carboxylase	0	U	K.MLSTDDK.E	67.842	65.8492	65.1547	67.5941	68.624	58.1172	198.224	201.595	195.674	141.659	139.644	141.643
sp|Q00955|ACAC_YEAST	ACC1	Acetyl-CoA carboxylase	0	U	K.AETFHEMEK.A	13.2498	12.1775	11.8908	27.5129	23.5189	29.3603	30.1316	33.5507	27.822	45.0821	41.0037	48.3814
sp|Q00955|ACAC_YEAST	ACC1	Acetyl-CoA carboxylase	0	U	K.MEYEITNYSER.H	3.51331	7.72031	5.91357	5.5243	6.15776	7.1763	16.1237	16.9138	20.6165	8.9453	10.0584	12.7558
sp|Q00955|ACAC_YEAST	ACC1	Acetyl-CoA carboxylase	0	U	K.NFSADVK.L	30.9357	26.8508	29.2629	26.104	27.4304	21.7196	52.4574	52.5972	52.2769	41.5147	34.3888	34.7473
sp|Q00955|ACAC_YEAST	ACC1	Acetyl-CoA carboxylase	0	U	R.NIHVYEAVSK.T	277.469	298.889	274.711	230.036	240.822	257.517	544.298	551.571	549.361	407.584	369.021	407.422
sp|Q00955|ACAC_YEAST	ACC1	Acetyl-CoA carboxylase	0	U	R.TEQIEHILK.S	55.4138	52.4846	54.6078	45.4193	59.5659	54.1314	91.8757	84.8427	81.3961	60.0165	56.3524	63.6094
sp|Q00955|ACAC_YEAST	ACC1	Acetyl-CoA carboxylase	0	U	R.IYLAANSGAR.I	53.2918	55.2056	68.4981	47.1908	44.4896	48.4594	122.01	104.568	126.347	85.1432	85.2833	83.028
sp|Q00955|ACAC_YEAST	ACC1	Acetyl-CoA carboxylase	0	U	K.VAYGSSNPK.R	149.757	137.261	131.226	104.77	105.259	99.9796	241.208	250.687	239.205	165.207	168.267	161.543
sp|P21192|ACE2_YEAST	ACE2	Metallothionein expression activator	0	U	K.VLEEQEEVAQK.L	54.5472	72.7535	71.7682	95.8611	80.7968	80.8548	301.559	270.828	274.683	234.894	238.222	211.655
sp|P21192|ACE2_YEAST	ACE2	Metallothionein expression activator	0	U	K.KPTTLPPGTIDQYVK.E	247.014	227.586	235.9	234.48	248.725	243.731	645.112	713.35	705.352	605.45	572.764	586.932
sp|P21192|ACE2_YEAST	ACE2	Metallothionein expression activator	0	U	R.SPFLVGTDK.S	20.2591	19.6744	18.9977	17.521	17.6382	14.4242	63.767	82.0528	64.0621	67.7577	71.2132	59.5542
sp|P21192|ACE2_YEAST	ACE2	Metallothionein expression activator	0	U	R.DNQIQQEK.L	12.0208	11.1164	9.3147	3.51049	9.26496	11.1744	22.0965	22.6762	20.6876	22.1857	18.2572	16.5608
sp|Q12168|ENG2_YEAST	ACF2	Endo-1,3(4)-beta-glucanase 2	0	U	R.TPSSSNPLADSQVNSDNIFQSPVLSNLK.A	10.0489	10.8431	11.2443	18.6021	21.7174	21.4105	16.8002	22.5398	14.3537	20.1424	17.2811	18.6421
sp|Q12168|ENG2_YEAST	ACF2	Endo-1,3(4)-beta-glucanase 2	0	U	R.SFDWFNGHSWAK.G	97.9411	80.964	84.64	201.162	193.455	203.966	102.011	106.564	122.418	156.602	145.617	163.068
sp|Q12168|ENG2_YEAST	ACF2	Endo-1,3(4)-beta-glucanase 2	0	U	R.NVFQSYFLYESNNTVQPK.E	35.3678	36.299	39.4871	83.027	82.7012	91.3637	49.8007	47.3283	38.0048	73.805	68.287	75.0314
sp|Q12168|ENG2_YEAST	ACF2	Endo-1,3(4)-beta-glucanase 2	0	U	R.DPELFGLAANHTLASQR.V	4.55594	9.26141	7.02053	10.2063	10.8694	13.2204	5.59195	7.86855	5.98299	14.0054	13.4571	12.788
sp|Q12168|ENG2_YEAST	ACF2	Endo-1,3(4)-beta-glucanase 2	0	U	K.YNIQLENNR.N	15.3672	20.3942	22.9918	35.1852	43.7033	42.5115	21.6987	29.0839	23.645	33.8899	34.5045	37.6
sp|Q12168|ENG2_YEAST	ACF2	Endo-1,3(4)-beta-glucanase 2	0	U	K.AAFTPEMQER.E	34.1501	27.1128	34.263	69.6809	69.8623	70.8701	36.1911	38.4583	36.2565	54.9799	53.2924	48.4354
sp|Q12168|ENG2_YEAST	ACF2	Endo-1,3(4)-beta-glucanase 2	0	U	R.EAAVQEVQLSDPQQESNIDSMYFSGK.I	21.9884	18.8138	19.4743	40.3036	41.6566	35.4391	21.9907	20.9565	20.7373	28.6077	35.7862	40.49
sp|Q12168|ENG2_YEAST	ACF2	Endo-1,3(4)-beta-glucanase 2	0	U	R.DPELFGLAANHTLASQR.V	28.3905	27.9113	24.052	54.2031	46.9355	47.9068	34.8273	30.8706	37.1771	50.2664	46.4155	53.4262
sp|Q12168|ENG2_YEAST	ACF2	Endo-1,3(4)-beta-glucanase 2	0	U	R.TPSSSNPLADSQVNSDNIFQSPVLSNLK.A	15.6398	13.2009	17.079	24.2744	22.9541	22.3381	16.9294	16.6491	18.1854	23.8857	24.7528	27.0446
sp|P47129|ACF4_YEAST	ACF4	Assembly-complementing factor 4	0	U	K.NANTTATAGENTPFLQR.I	68.1876	60.9501	67.0129	67.0056	72.9243	56.7092	86.4983	96.722	94.38	93.3291	86.9978	104.986
sp|P47129|ACF4_YEAST	ACF4	Assembly-complementing factor 4	0	U	R.SSESTPTSGPPLLPPR.N	69.2132	78.5005	78.3813	86.9012	86.0647	85.5148	96.7964	102.449	87.1493	111.488	106.535	116.24
sp|P47129|ACF4_YEAST	ACF4	Assembly-complementing factor 4	0	U	R.VISQPIELHK.L	56.9881	56.2204	53.1513	55.623	53.8156	62.5895	164.753	176.162	161.222	160.967	171.43	170.13
sp|P47129|ACF4_YEAST	ACF4	Assembly-complementing factor 4	0	U	K.HSQGQQQQPHQK.Q	6.43773	7.85345	6.43836	8.49151	8.86162	12.0945	14.1106	15.9338	17.674	16.6885	17.8803	19.6889
sp|P47129|ACF4_YEAST	ACF4	Assembly-complementing factor 4	0	U	R.EINELSFK.L	91.633	82.7781	93.6581	89.6989	97.1435	82.2318	143.46	138.268	145.906	159.279	156.398	135.469
sp|P47129|ACF4_YEAST	ACF4	Assembly-complementing factor 4	0	U	R.VISQPIELHK.L	62.1758	55.3545	58.0432	76.2173	55.1444	66.2078	159.081	148.476	149.26	163.592	169.207	157.062
sp|P47129|ACF4_YEAST	ACF4	Assembly-complementing factor 4	0	U	K.QLELQFK.D	12.3311	12.0258	16.2719	14.8783	15.4422	13.3367	16.9343	16.4459	16.0522	14.1061	15.663	17.6901
sp|P47129|ACF4_YEAST	ACF4	Assembly-complementing factor 4	0	U	K.LGNQNPSEYLSTFTK.R	107.453	112.522	113.849	114.441	111.545	99.2519	172.403	179.104	188.84	179.487	186.854	192.732
sp|P47129|ACF4_YEAST	ACF4	Assembly-complementing factor 4	0	U	K.LGNQNPSEYLSTFTK.R	95.7769	82.3898	94.4231	82.4434	74.6351	92.2598	131.792	132.716	141.881	138.74	124.583	141.349
sp|P32316|ACH1_YEAST	ACH1	Acetyl-CoA hydrolase	0	U	R.AFANWENFK.H	99.7382	83.0582	93.8307	74.0159	66.4912	74.4894	12.6376	11.1616	6.23593	7.60225	7.67686	5.17026
sp|P32316|ACH1_YEAST	ACH1	Acetyl-CoA hydrolase	0	U	R.SQVVSNNPEMIR.R	111.017	103.175	117.008	95.6458	96.6593	102.427	7.85266	13.3165	13.4211	11.536	7.87322	10.8469
sp|P32316|ACH1_YEAST	ACH1	Acetyl-CoA hydrolase	0	U	R.WAEHDM*IIK.R	285.511	305.283	312.029	242.396	248.523	262.497	21.3083	35.9575	40.3253	28.4474	25.0143	26.921
sp|P32316|ACH1_YEAST	ACH1	Acetyl-CoA hydrolase	0	U	K.AVPEALIDHVEK.N	330.981	336.588	358.841	320.251	306.644	302.468	38.9738	43.3722	46.2932	39.3767	33.0373	35.1693
sp|P32316|ACH1_YEAST	ACH1	Acetyl-CoA hydrolase	0	U	R.WAEHDMIIK.R	184.578	187.829	179.21	168.598	159.706	156.295	20.075	24.9639	32.7777	20.0793	26.109	24.9185
sp|P32316|ACH1_YEAST	ACH1	Acetyl-CoA hydrolase	0	U	K.FHTNLAEK.G	441.329	457.463	463.172	411.96	375.753	406.872	53.8458	47.836	62.7641	39.6244	40.3723	47.6806
sp|P32316|ACH1_YEAST	ACH1	Acetyl-CoA hydrolase	0	U	R.MLNGLGGSADFLR.N	36.9912	39.2927	38.2536	47.5612	36.1143	41.9331	5.8331	3.57729	6.83642	4.95457	6.65334	6.83872
sp|P32316|ACH1_YEAST	ACH1	Acetyl-CoA hydrolase	0	U	R.DQVPPNTPSDDM*SR.A	36.5673	32.3528	30.5972	25.1076	29.3859	20.9315	2.26615	3.23489	0	0	0.00991175	4.6089
sp|P32316|ACH1_YEAST	ACH1	Acetyl-CoA hydrolase	0	U	R.DQVPPNTPSDDM*SR.A	148.369	144.011	153.028	142.014	140.966	127.869	10.5615	12.4034	11.1679	8.88364	8.60804	6.05159
sp|P32316|ACH1_YEAST	ACH1	Acetyl-CoA hydrolase	0	U	R.DQVPPNTPSDDMSR.A	2425.4	2660.26	2430.27	2277.2	815.553	2796.85	303.071	192.364	273.186	178.003	151.248	145.535
sp|P32316|ACH1_YEAST	ACH1	Acetyl-CoA hydrolase	0	U	K.AVPEALIDHVEK.N	129.699	155.007	153.495	107.495	121.169	115.278	14.4482	19.4397	16.3919	15.6518	11.2699	7.08691
sp|P32316|ACH1_YEAST	ACH1	Acetyl-CoA hydrolase	0	U	K.AVPEALIDHVEK.N	144.263	136.112	144.149	112.899	96.1701	117.588	10.5521	9.83215	15.9865	7.48761	9.78856	3.71854
sp|P32316|ACH1_YEAST	ACH1	Acetyl-CoA hydrolase	0	U	K.AVPEALIDHVEK.N	34.9601	43.4892	38.5493	34.1388	40.1563	33.9197	1.29652	4.01432	5.34111	3.55506	0	0
sp|P32316|ACH1_YEAST	ACH1	Acetyl-CoA hydrolase	0	U	R.APHQVGKPIAK.A	782.052	599.024	701.281	1070.51	797.461	796.647	82.5261	47.1914	108.066	56.304	60.6653	64.4236
sp|P32316|ACH1_YEAST	ACH1	Acetyl-CoA hydrolase	0	U	K.VDSWEPVD.-	375.554	391.548	413.498	366.027	365.774	368.846	33.1407	21.8649	37.3376	22.0456	20.3438	19.5774
sp|P32316|ACH1_YEAST	ACH1	Acetyl-CoA hydrolase	0	U	R.AFANWENFKHR.L	64.8237	51.7596	56.7509	52.9845	34.8311	40.7268	2.40589	3.0143	4.90539	0	0	2.8089
sp|P32316|ACH1_YEAST	ACH1	Acetyl-CoA hydrolase	0	U	K.AVPEALIDHVEK.N	90.9264	97.1444	84.4035	85.5856	74.3992	71.6745	16.7098	18.0522	19.4685	18.6779	21.0525	19.2267
sp|P32316|ACH1_YEAST	ACH1	Acetyl-CoA hydrolase	0	U	K.AVPEALIDHVEK.N	24.412	38.1961	11.2252	9.91618	16.2303	10.347	3.16517	2.52771	0	0	0.0118264	0.0096657
sp|P32316|ACH1_YEAST	ACH1	Acetyl-CoA hydrolase	0	U	R.DQVPPNTPSDDMSR.A	48.9529	52.4264	48.2032	45.9033	42.9746	40.4575	4.52018	6.92721	6.19472	3.6146	3.47384	0
sp|P32316|ACH1_YEAST	ACH1	Acetyl-CoA hydrolase	0	U	K.EAHELIPLFK.N	342.595	322.076	332.679	300.62	299.058	300.587	22.0864	16.9424	31.3913	21.0282	21.6556	19.9859
sp|P32316|ACH1_YEAST	ACH1	Acetyl-CoA hydrolase	0	U	K.FHTNLAEK.G	1131.55	1086.32	1103.43	1034.82	991.197	1015	117.082	100.528	152.659	99.5876	99.1025	95.3278
sp|P32316|ACH1_YEAST	ACH1	Acetyl-CoA hydrolase	0	U	R.DQVPPNTPSDDMSR.A	390.565	438.599	445.112	409.017	418.193	425.235	37.0885	24.3212	35.2947	24.731	28.1346	19.1742
sp|P32316|ACH1_YEAST	ACH1	Acetyl-CoA hydrolase	0	U	R.AIAGHLVEFFR.N	1555	1535.95	1582.89	1574.19	1304.33	1477.5	113.823	89.1082	159.932	83.4277	88.2366	82.9544
sp|P32316|ACH1_YEAST	ACH1	Acetyl-CoA hydrolase	0	U	R.FNLFVGASAGPEENR.W	23.7516	21.6478	29.6174	22.8826	26.9264	24.0126	3.06307	5.64618	4.09827	5.00858	8.71541	6.36918
sp|P32316|ACH1_YEAST	ACH1	Acetyl-CoA hydrolase	0	U	R.SQVVSNNPEM*IR.R	1675.07	916.715	939.125	307.904	831.86	354.882	33.0871	55.0186	61.2489	42.7132	30.0125	33.4998
sp|P32316|ACH1_YEAST	ACH1	Acetyl-CoA hydrolase	0	U	K.FHTNLAEK.G	38.9143	33.2564	36.9844	36.2068	29.3515	28.8814	1.91479	3.96144	5.77015	0	3.97052	0.0162564
sp|P32316|ACH1_YEAST	ACH1	Acetyl-CoA hydrolase	0	U	K.AVPEALIDHVEK.N	38.6669	33.1512	38.7476	31.647	30.601	26.9043	10.8385	13.8208	17.5662	17.8124	15.6786	13.1733
sp|P32316|ACH1_YEAST	ACH1	Acetyl-CoA hydrolase	0	U	R.SQVVSNNPEMIR.R	29.0406	30.6445	35.9156	31.6956	28.8521	33.4637	2.17452	1.4891	3.7577	3.39518	2.76604	0
sp|P32316|ACH1_YEAST	ACH1	Acetyl-CoA hydrolase	0	U	K.AVPEALIDHVEK.N	81.7054	107.91	87.4803	79.5945	97.4984	95.9143	8.23608	9.02485	11.108	12.869	15.6667	15.1682
sp|P32316|ACH1_YEAST	ACH1	Acetyl-CoA hydrolase	0	U	K.AVPEALIDHVEK.N	99.3286	110.945	82.5754	93.3442	87.4755	97.0594	12.5872	11.0575	11.2515	9.55961	11.9008	11.1309
sp|P32316|ACH1_YEAST	ACH1	Acetyl-CoA hydrolase	0	U	R.DQVPPNTPSDDMSR.A	45.3436	46.59	36.4701	36.4871	38.9191	32.1862	1.6686	4.2992	0	3.70406	3.27752	3.20594
sp|P32316|ACH1_YEAST	ACH1	Acetyl-CoA hydrolase	0	U	R.WAEHDM*IIK.R	336.238	209.395	205.117	92.0185	165.031	110.83	19.7937	19.6659	26.3656	17.6215	15.9422	11.0602
sp|P32316|ACH1_YEAST	ACH1	Acetyl-CoA hydrolase	0	U	R.WAEHDM*IIK.R	628.547	413.682	426.803	199.497	304.493	228.786	48.3774	46.7992	56.6223	44.8526	44.3455	42.8284
sp|P32316|ACH1_YEAST	ACH1	Acetyl-CoA hydrolase	0	U	K.VVAIVESTM*R.D	34.1536	38.3985	37.8885	40.4463	39.8877	45.1507	6.36581	5.58064	3.60073	5.21788	6.45987	3.9292
sp|P32316|ACH1_YEAST	ACH1	Acetyl-CoA hydrolase	0	U	K.VVAIVESTM*R.D	44.4997	45.3559	50.6972	50.61	38.5534	39.7599	7.03279	3.41318	4.53791	0	3.68546	0.0152428
sp|P32316|ACH1_YEAST	ACH1	Acetyl-CoA hydrolase	0	U	R.SQVVSNNPEMIR.R	184.74	218.812	206.039	176.741	183.029	192.189	23.9297	12.9826	17.6333	13.4124	16.1967	11.6719
sp|P32316|ACH1_YEAST	ACH1	Acetyl-CoA hydrolase	0	U	R.WAEHDM*IIK.R	308.669	315.365	295.301	288.542	289.557	295.409	44.5948	36.8398	45.3312	29.6131	29.2237	28.1452
sp|P32316|ACH1_YEAST	ACH1	Acetyl-CoA hydrolase	0	U	R.SQVVSNNPEMIR.R	329.154	368.724	377.156	328.904	330.747	343.569	29.6269	32.179	33.8844	21.673	24.0673	23.3084
sp|Q07622|ACK1_YEAST	ACK1	Activator of C kinase protein 1	0	U	K.INQPPTGSAK.T	128.243	129.904	146.297	127.284	128.965	130.993	228.87	207.716	213.486	159.888	193.643	179.341
sp|Q07622|ACK1_YEAST	ACK1	Activator of C kinase protein 1	0	U	K.DFEYPLAQWK.L	127.977	145.122	134.559	114.44	127.485	115.24	169.954	168.543	162.34	148.238	149.58	132.016
sp|Q07622|ACK1_YEAST	ACK1	Activator of C kinase protein 1	0	U	K.AAAAQPK.G	28.5604	26.111	34.1021	27.5526	21.1819	24.4985	43.1827	36.0678	43.6985	41.1435	28.4577	31.466
sp|Q07622|ACK1_YEAST	ACK1	Activator of C kinase protein 1	0	U	K.ESLGSPAVQDASISSGNR.I	6.42396	4.51048	10.3493	8.12221	7.64465	9.45434	17.6649	13.089	20.7853	16.7731	13.2275	18.1957
sp|Q07622|ACK1_YEAST	ACK1	Activator of C kinase protein 1	0	U	R.GTSSLDPSPTK.E	87.3221	94.5525	81.2952	80.6183	77.6464	70.55	115.424	105.15	114.57	94.4672	84.0161	90.95
sp|Q03771|ACL4_YEAST	ACL4	Assembly chaperone of RPL4	0	U	R.GIMNISNTGGEMLTNVQVEK.I	60.163	60.1705	52.51	68.4695	82.1495	73.9302	93.6481	121.817	79.9834	113.819	99.2973	123.922
sp|Q03771|ACL4_YEAST	ACL4	Assembly chaperone of RPL4	0	U	R.GIMNISNTGGEMLTNVQVEK.I	13.4918	20.5197	13.1895	17.6764	16.3249	14.8651	34.6569	34.624	25.9504	36.8644	29.5176	36.2265
sp|Q03771|ACL4_YEAST	ACL4	Assembly chaperone of RPL4	0	U	K.EALAENNAK.K	14.9765	17.0065	12.1724	20.675	24.4503	19.8154	29.882	24.5972	31.9827	37.8301	34.5427	34.1278
sp|Q03771|ACL4_YEAST	ACL4	Assembly chaperone of RPL4	0	U	K.ENANNVILNEVFADAYLDNGQVEK.A	21.2855	26.305	32.1799	30.6738	32.2893	30.3002	56.3388	56.7641	51.0403	69.6738	68.0149	76.4846
sp|Q03771|ACL4_YEAST	ACL4	Assembly chaperone of RPL4	0	U	K.ENANNVILNEVFADAYLDNGQVEK.A	21.0222	18.7749	13.6267	24.9126	23.555	16.0739	39.9353	41.2658	46.4078	38.5519	37.729	48.8532
sp|Q03771|ACL4_YEAST	ACL4	Assembly chaperone of RPL4	0	U	K.SPETWSTLGSIK.I	18.5053	14.9836	22.1849	21.1432	14.5374	19.3394	34.512	40.2672	42.5419	39.3758	44.0616	43.6877
sp|Q03771|ACL4_YEAST	ACL4	Assembly chaperone of RPL4	0	U	K.AMELTEGK.S	11.6684	12.6623	8.91869	14.4534	11.6684	7.87914	11.735	17.7941	12.4579	12.5316	15.9354	17.2347
sp|Q03771|ACL4_YEAST	ACL4	Assembly chaperone of RPL4	0	U	K.ENANNVILNEVFADAYLDNGQVEK.A	14.1478	17.3715	13.9129	18.1577	17.1626	17.0058	36.9489	36.7085	31.2381	32.3198	37.9037	35.2066
sp|Q03771|ACL4_YEAST	ACL4	Assembly chaperone of RPL4	0	U	K.AGLQSEYVDLLQPLLSLTK.M	212.981	210.297	212.811	247.421	279.366	263.622	427.744	486.32	349.992	503.423	533.867	519.2
sp|Q03771|ACL4_YEAST	ACL4	Assembly chaperone of RPL4	0	U	K.KQEIGSGINENGDTTQK.A	66.6517	61.1487	52.2961	100.913	86.2481	83.9832	117.756	120.487	119.997	127.769	136.394	137.49
sp|Q03771|ACL4_YEAST	ACL4	Assembly chaperone of RPL4	0	U	K.EALAENNAK.K	124.876	105.615	111.705	144.336	140.861	148.577	220.738	214.906	226.167	266.343	264.69	251.602
sp|P19414|ACON_YEAST	ACO1	Aconitate hydratase, mitochondrial	0	U	R.GHLENISNNYM*IGAINAENK.K	26.8318	21.2999	16.1378	41.0829	31.758	35.1854	13.6832	13.8151	16.1005	9.86869	16.2549	11.7731
sp|P19414|ACON_YEAST	ACO1	Aconitate hydratase, mitochondrial	0	U	K.QNVETLDIVR.K	30.8523	28.1175	25.1324	68.2016	60.0324	65.1239	13.2316	12.3677	13.5291	9.44299	16.8426	11.0466
sp|P19414|ACON_YEAST	ACO1	Aconitate hydratase, mitochondrial	0	U	K.SM*IEYLEATGR.G	84.9461	70.4867	82.0689	120.276	158.519	127.104	34.3799	34.5322	41.0973	27.6629	28.3698	25.8522
sp|P19414|ACON_YEAST	ACO1	Aconitate hydratase, mitochondrial	0	U	K.QNVETLDIVR.K	86.1066	89.9551	85.9512	199.394	208.648	181.095	36.8881	33.2647	40.2139	31.125	25.1993	31.3896
sp|P19414|ACON_YEAST	ACO1	Aconitate hydratase, mitochondrial	0	U	K.VNQNLLEDHSFINYK.Q	22.9632	27.5982	22.0498	53.5169	52.7484	46.7809	11.1117	9.52671	9.4241	8.32606	12.5792	9.82407
sp|P19414|ACON_YEAST	ACO1	Aconitate hydratase, mitochondrial	0	U	K.YGSALNK.I	11.7519	8.07119	12.4793	27.9645	24.1328	28.6674	4.94562	3.16388	2.36405	0	3.63669	0.0134502
sp|P19414|ACON_YEAST	ACO1	Aconitate hydratase, mitochondrial	0	U	K.NPADYDK.I	295.117	271.443	276.493	736.034	695.608	727.907	157.94	134.758	135.743	97.5851	93.092	92.0545
sp|P19414|ACON_YEAST	ACO1	Aconitate hydratase, mitochondrial	0	U	K.NVYTGEYK.G	37.0051	46.3684	47.1216	96.2555	114.663	107.631	12.5551	14.5169	22.2957	16.7462	12.6031	12.6805
sp|P19414|ACON_YEAST	ACO1	Aconitate hydratase, mitochondrial	0	U	K.NPADYDK.I	46.8384	48.3387	47.5386	105.55	95.3016	115.68	34.1665	33.453	34.918	38.7072	32.8615	25.424
sp|P19414|ACON_YEAST	ACO1	Aconitate hydratase, mitochondrial	0	U	K.NTIVSSYNR.N	22.9241	23.4766	27.5835	77.5626	69.1294	71.4897	9.28986	9.62075	8.87238	9.60254	7.54771	9.72353
sp|P19414|ACON_YEAST	ACO1	Aconitate hydratase, mitochondrial	0	U	K.QGLLPLNFK.N	90.4711	82.8829	96.6684	240.715	225.192	214.245	51.4221	45.5186	46.1499	37.3704	34.8088	32.5726
sp|P19414|ACON_YEAST	ACO1	Aconitate hydratase, mitochondrial	0	U	K.NTIVSSYNR.N	48.8052	53.5837	62.037	167.539	161.306	159.069	24.3165	21.0423	17.7573	22.0902	17.0568	18.9961
sp|P19414|ACON_YEAST	ACO1	Aconitate hydratase, mitochondrial	0	U	K.DAAAHGLK.S	458.327	488.531	501.05	1501.59	1431.85	1469.68	226.191	215.874	227.401	149.635	148.429	148.529
sp|P19414|ACON_YEAST	ACO1	Aconitate hydratase, mitochondrial	0	U	K.ILYGHLDDPHGQDIQR.G	76.9942	79.2441	75.6496	183.466	165.549	169.978	44.2951	41.1095	43.4957	41.1752	35.8164	40.8977
sp|P19414|ACON_YEAST	ACO1	Aconitate hydratase, mitochondrial	0	U	K.MNGWTSPK.D	64.9683	81.3002	83.8496	177.789	179.639	188.671	39.2176	43.191	42.0885	28.5165	25.4672	18.4943
sp|P19414|ACON_YEAST	ACO1	Aconitate hydratase, mitochondrial	0	U	R.DGQLETFK.E	107.382	90.2281	115.355	271.941	281.994	248.308	51.7112	42.4075	58.4108	31.5279	37.2309	35.0987
sp|P19414|ACON_YEAST	ACO1	Aconitate hydratase, mitochondrial	0	U	K.M*NGWTSPK.D	111.52	105.367	122.529	326.11	304.742	311.66	59.6657	55.9078	58.7899	52.0604	50.8582	47.7676
sp|P19414|ACON_YEAST	ACO1	Aconitate hydratase, mitochondrial	0	U	K.DAAAHGLK.S	28.255	33.5004	37.2018	77.2446	76.2719	69.2474	28.1565	21.3522	23.9584	15.9824	14.3507	12.5784
sp|P19414|ACON_YEAST	ACO1	Aconitate hydratase, mitochondrial	0	U	R.EHAALEPR.F	12.608	14.2529	14.7574	26.969	30.6081	28.0283	3.32596	8.44646	5.84685	3.12164	4.20911	4.81012
sp|P19414|ACON_YEAST	ACO1	Aconitate hydratase, mitochondrial	0	U	K.DGNEFM*LKPPHGDGLPQR.G	76.8971	65.8863	73.6916	180.108	169.105	153.691	52.4408	41.902	58.9434	41.5702	35.0603	49.2577
sp|P19414|ACON_YEAST	ACO1	Aconitate hydratase, mitochondrial	0	U	R.GYDAGENTYQAPPADR.S	52.8779	58.854	49.211	144.994	138.144	126.165	30.9796	24.9364	26.8075	19.2261	15.5034	19.3295
sp|P19414|ACON_YEAST	ACO1	Aconitate hydratase, mitochondrial	0	U	K.NVYTGEYK.G	256.725	249.744	246.883	684.278	736.57	708.601	86.7247	91.7888	103.128	73.4062	73.5797	66.1921
sp|P19414|ACON_YEAST	ACO1	Aconitate hydratase, mitochondrial	0	U	K.DLLSADK.D	149.035	151.749	178.961	404.381	435.713	396.263	79.7332	73.8005	84.0808	45.9874	50.6237	44.4968
sp|P19414|ACON_YEAST	ACO1	Aconitate hydratase, mitochondrial	0	U	K.NVYTGEYK.G	26.9897	22.4221	23.0869	60.642	64.1431	65.9665	23.183	18.404	14.94	10.8175	10.846	10.676
sp|P19414|ACON_YEAST	ACO1	Aconitate hydratase, mitochondrial	0	U	K.DLLSADK.D	107.697	109.074	106.795	258.937	260.872	255.956	79.1683	82.8969	74.88	74.7434	74.5599	66.7635
sp|P19414|ACON_YEAST	ACO1	Aconitate hydratase, mitochondrial	0	U	R.EHAALEPR.F	23.5232	75.2437	22.1544	43.5363	37.4109	37.7804	11.4553	26.5774	8.35623	8.72278	9.66292	7.39609
sp|P19414|ACON_YEAST	ACO1	Aconitate hydratase, mitochondrial	0	U	K.NVYTGEYK.G	48.2743	43.4722	52.7725	115.607	139.538	131.096	22.4623	23.7142	24.4419	12.2617	18.2856	16.6579
sp|P19414|ACON_YEAST	ACO1	Aconitate hydratase, mitochondrial	0	U	K.DAAAHGLK.S	207.407	249.271	250.066	108.996	135.187	136.881	58.7417	60.6408	46.6682	55.7875	55.7572	39.5059
sp|P19414|ACON_YEAST	ACO1	Aconitate hydratase, mitochondrial	0	U	K.SMIEYLEATGR.G	12.545	9.51817	8.36209	19.8422	23.6872	24.8953	6.0027	4.68726	4.60557	8.35281	0	6.78522
sp|P19414|ACON_YEAST	ACO1	Aconitate hydratase, mitochondrial	0	U	R.GYDAGENTYQAPPADR.S	7.31731	9.90378	10.3378	23.4735	28.2577	22.9858	3.72424	4.92753	4.39671	3.7041	2.30717	0
sp|P19414|ACON_YEAST	ACO1	Aconitate hydratase, mitochondrial	0	U	K.NTIVSSYNR.N	13.5082	13.948	12.4175	47.3985	37.7922	38.4757	6.48289	9.71681	11.258	7.57638	8.14806	9.65961
sp|P19414|ACON_YEAST	ACO1	Aconitate hydratase, mitochondrial	0	U	K.DAAAHGLK.S	219.846	212.238	233.188	606.859	631.931	575.092	100.548	84.0784	113.6	73.6426	75.6582	73.5335
sp|P19414|ACON_YEAST	ACO1	Aconitate hydratase, mitochondrial	0	U	K.DGNEFM*LKPPHGDGLPQR.G	35.8619	29.9583	26.3465	45.9774	50.9822	48.372	17.3806	12.8722	15.7166	7.91465	7.57446	9.54596
sp|P19414|ACON_YEAST	ACO1	Aconitate hydratase, mitochondrial	0	U	K.EVAVANNWPLDVR.V	203.295	194.18	208.967	554.444	544.53	546.031	90.4715	81.436	109.366	79.1357	76.741	83.8906
sp|P19414|ACON_YEAST	ACO1	Aconitate hydratase, mitochondrial	0	U	R.GYDAGENTYQAPPADR.S	125.186	125.318	115.846	329.822	321.518	339.929	59.1613	53.8245	69.2265	42.8398	50.2473	41.0109
sp|P19414|ACON_YEAST	ACO1	Aconitate hydratase, mitochondrial	0	U	K.DLLSADK.D	65.1145	72.1386	67.7306	186.932	203.657	208.979	48.0272	44.5836	38.6741	29.7605	35.8554	33.5215
sp|P19414|ACON_YEAST	ACO1	Aconitate hydratase, mitochondrial	0	U	K.GVPDTAR.D	115.153	104.452	114.803	297.126	292.33	270.443	44.3783	38.2741	44.7368	37.1343	31.6942	27.6974
sp|P19414|ACON_YEAST	ACO1	Aconitate hydratase, mitochondrial	0	U	K.NVYTGEYK.G	124.463	113.606	122.124	319.526	318.806	305.71	41.7681	42.6838	55.6647	34.6933	37.2483	27.988
sp|P19414|ACON_YEAST	ACO1	Aconitate hydratase, mitochondrial	0	U	K.VSPTSDR.L	14.5851	18.6812	19.8701	55.0255	47.249	46.0704	9.61412	6.81784	11.4612	5.71409	5.48938	8.66783
sp|P19414|ACON_YEAST	ACO1	Aconitate hydratase, mitochondrial	0	U	K.NPADYDK.I	56.7347	50.0767	49.7445	138.071	133.945	119.115	22.0617	24.3845	23.0606	18.7082	22.0325	14.4642
sp|P19414|ACON_YEAST	ACO1	Aconitate hydratase, mitochondrial	0	U	K.NTIVSSYNR.N	59.9828	62.7694	61.1942	181.518	169.336	158.503	20.2927	22.2761	20.2948	17.862	18.7701	14.6667
sp|P19414|ACON_YEAST	ACO1	Aconitate hydratase, mitochondrial	0	U	K.YGSALNK.I	225.884	219.443	221.914	526.691	516.364	505.803	104.524	104.308	109.122	113.198	89.9942	103.548
sp|P19414|ACON_YEAST	ACO1	Aconitate hydratase, mitochondrial	0	U	K.M*NGWTSPK.D	80.8759	40.5879	52.6199	51.6952	96.8946	54.2347	13.9077	15.4291	17.5446	10.9595	9.68777	7.13189
sp|P19414|ACON_YEAST	ACO1	Aconitate hydratase, mitochondrial	0	U	K.QNVETLDIVR.K	78.955	72.804	64.7503	181.52	193.159	181.711	31.3776	25.138	36.1863	19.0184	25.3372	23.529
sp|P19414|ACON_YEAST	ACO1	Aconitate hydratase, mitochondrial	0	U	K.TTTDHISM*AGPWLK.Y	64.3565	50.1526	52.098	126.043	106.317	76.4727	14.4536	16.1965	25.0094	19.8963	13.8703	23.5315
sp|P19414|ACON_YEAST	ACO1	Aconitate hydratase, mitochondrial	0	U	R.DGQLETFK.E	93.2941	92.1784	89.4173	232.399	254.668	236.903	38.5059	41.9213	45.5139	30.7491	31.0546	27.5074
sp|P19414|ACON_YEAST	ACO1	Aconitate hydratase, mitochondrial	0	U	R.DGQLETFK.E	144.26	135.828	164.208	361.727	409.21	378.433	65.3755	68.0365	70.6115	59.0179	60.394	57.2408
sp|P19414|ACON_YEAST	ACO1	Aconitate hydratase, mitochondrial	0	U	K.M*NGWTSPK.D	39.7422	33.7036	45.3567	101.498	90.4344	99.2456	17.6045	10.0969	13.0804	10.8065	10.8705	13.79
sp|P19414|ACON_YEAST	ACO1	Aconitate hydratase, mitochondrial	0	U	R.GYDAGENTYQAPPADR.S	29.2337	24.8088	21.0181	60.1254	58.5714	53.9848	9.48936	11.7475	11.3577	7.80542	6.6331	7.90268
sp|P19414|ACON_YEAST	ACO1	Aconitate hydratase, mitochondrial	0	U	K.NVYTGEYK.G	358.334	355.021	385.033	1036.04	1070.8	1020.48	135.913	136.495	176.45	118.174	118.568	107.955
sp|P19414|ACON_YEAST	ACO1	Aconitate hydratase, mitochondrial	0	U	K.NPADYDK.I	134.228	187.768	131.927	477.413	372.172	458.6	61.8852	81.3704	66.999	52.1691	38.9087	64.5561
sp|P19414|ACON_YEAST	ACO1	Aconitate hydratase, mitochondrial	0	U	K.YGSALNK.I	193.072	176.496	172.082	514.236	480.371	461.065	85.4825	85.6318	100.861	62.2705	68.0225	62.2832
sp|P19414|ACON_YEAST	ACO1	Aconitate hydratase, mitochondrial	0	U	K.DGNEFMLKPPHGDGLPQR.G	146.355	154.943	138.504	377.784	365.584	354.046	80.8376	71.6929	91.0058	59.3742	63.3678	62.7041
sp|P19414|ACON_YEAST	ACO1	Aconitate hydratase, mitochondrial	0	U	R.DGQLETFK.E	124.706	119.099	112.604	284.417	318.154	289.039	50.0169	63.3068	59.8929	54.4314	56.1168	48.1389
sp|P19414|ACON_YEAST	ACO1	Aconitate hydratase, mitochondrial	0	U	R.FLGGFAIITK.S	5.59266	7.76278	10.1405	23.4258	18.3389	16.4279	4.93623	6.73056	6.29647	2.73886	4.78559	2.83616
sp|P19414|ACON_YEAST	ACO1	Aconitate hydratase, mitochondrial	0	U	R.IDILGLAELAPGK.P	56.5755	70.0249	78.3258	127.943	135.482	144.147	37.997	40.4158	25.4952	32.7326	23.0024	24.3228
sp|P19414|ACON_YEAST	ACO1	Aconitate hydratase, mitochondrial	0	U	R.GHLENISNNYM*IGAINAENK.K	65.5197	54.9754	67.4539	178.577	180.289	168.044	26.4209	22.9916	26.7304	19.8967	18.0012	20.5258
sp|P19414|ACON_YEAST	ACO1	Aconitate hydratase, mitochondrial	0	U	K.QNVETLDIVR.K	84.3083	86.9049	83.9471	186.518	207.99	197.475	36.0513	35.3073	34.3856	33.64	28.6968	28.6802
sp|P39533|ACON2_YEAST	ACO2	Homocitrate dehydratase, mitochondrial	0	U	K.FYPEMDPKPDSNVEIK.V	59.2786	60.9246	61.8185	65.0159	65.7354	58.8622	144.087	158.468	136.73	77.6051	73.5687	80.9479
sp|P39533|ACON2_YEAST	ACO2	Homocitrate dehydratase, mitochondrial	0	U	K.FYPEMDPKPDSNVEIK.V	132.154	140.61	136.132	132.698	142.948	156.765	375.115	346.592	354.886	178.375	176.392	189.86
sp|P39533|ACON2_YEAST	ACO2	Homocitrate dehydratase, mitochondrial	0	U	R.FLGGEILLVK.S	53.6591	49.1602	47.543	42.368	43.5299	48.7499	136.081	131.027	129.434	72.592	66.1911	65.6862
sp|P39533|ACON2_YEAST	ACO2	Homocitrate dehydratase, mitochondrial	0	U	K.AGSAINYIGNIR.R	33.4536	32.7554	30.9348	25.9191	27.257	20.9799	49.2207	49.6402	61.1043	31.7602	23.1536	27.9099
sp|P39533|ACON2_YEAST	ACO2	Homocitrate dehydratase, mitochondrial	0	U	R.IPFFVTPGSEQIR.A	32.4322	27.9494	43.5963	41.7146	40.1972	36.6456	79.5403	85.285	83.2536	38.9705	40.8469	40.118
sp|P39533|ACON2_YEAST	ACO2	Homocitrate dehydratase, mitochondrial	0	U	K.DQIDFFK.A	18.1151	18.0455	19.2823	16.9941	13.2847	15.8857	32.2236	29.6943	33.3339	18.2171	26.3271	27.0552
sp|P39533|ACON2_YEAST	ACO2	Homocitrate dehydratase, mitochondrial	0	U	K.SDGRPWTVIAEHNYGEGSAR.E	10.422	7.91168	8.81197	5.9413	11.2091	10.8348	22.652	14.9261	17.3373	5.8971	11.2248	12.4059
sp|P39533|ACON2_YEAST	ACO2	Homocitrate dehydratase, mitochondrial	0	U	K.AGSAINYIGNIR.R	24.2326	20.8303	22.6155	28.9633	32.4517	31.2822	54.7182	45.1884	47.8059	35.6084	37.6771	34.1096
sp|P39533|ACON2_YEAST	ACO2	Homocitrate dehydratase, mitochondrial	0	U	K.DQIDFFK.A	54.9546	53.1372	46.3388	46.2582	43.7549	42.6842	105.958	114.055	100.912	69.6824	60.8945	66.6797
sp|P39533|ACON2_YEAST	ACO2	Homocitrate dehydratase, mitochondrial	0	U	K.FYPEM*DPKPDSNVEIK.V	16.3471	16.0079	16.2334	6.71901	8.35977	7.3236	36.3209	31.9717	34.0787	21.9133	18.663	14.0245
sp|P39533|ACON2_YEAST	ACO2	Homocitrate dehydratase, mitochondrial	0	U	K.GHLENISYNTLIGAQNK.E	36.741	42.7589	40.9075	32.823	33.1161	39.1117	83.4759	81.4373	89.2768	55.5502	47.3992	52.9593
sp|P39533|ACON2_YEAST	ACO2	Homocitrate dehydratase, mitochondrial	0	U	K.QGVLPLTFANESDYDK.I	44.1738	56.7216	45.7822	43.1399	47.9634	47.206	70.1255	71.9791	70.2153	51.5275	47.0366	60.6552
sp|P39533|ACON2_YEAST	ACO2	Homocitrate dehydratase, mitochondrial	0	U	K.ETNTIFTSFNR.N	13.9346	8.53726	9.21091	14.6342	12.0049	17.6491	22.3034	18.7448	18.31	10.8129	17.8509	10.9695
sp|P39533|ACON2_YEAST	ACO2	Homocitrate dehydratase, mitochondrial	0	U	K.LAGLLTVR.G	11.9862	8.51056	12.4708	12.9398	11.8267	7.26873	24.3044	22.1425	26.6457	12.6773	14.3914	13.4597
sp|P39533|ACON2_YEAST	ACO2	Homocitrate dehydratase, mitochondrial	0	U	K.QGVLPLTFANESDYDK.I	10.6334	7.58486	8.6002	4.40665	9.26793	6.73639	26.9138	18.7512	28.2555	13.7156	15.5809	11.1292
sp|P39533|ACON2_YEAST	ACO2	Homocitrate dehydratase, mitochondrial	0	U	K.QGVLPLTFANESDYDK.I	12.635	8.86179	12.0853	9.49683	6.1904	9.2677	23.332	28.4931	29.3765	16.1392	11.0066	15.1182
sp|P32463|ACPM_YEAST	ACP1	Acyl carrier protein, mitochondrial	0	U	K.QISSDTQFHK.D	102.928	117.77	111.209	298.77	237.903	196.671	76.4283	83.8073	114.228	94.7782	96.4552	103.347
sp|P32463|ACPM_YEAST	ACP1	Acyl carrier protein, mitochondrial	0	U	K.NSPNIANK.Q	53.1987	54.1317	54.2355	141.203	113.37	106.508	51.5337	37.9167	43.4939	40.8377	52.6071	44.912
sp|Q01574|ACS1_YEAST	ACS1	Acetyl-coenzyme A synthetase 1	0	U	K.ATQFLNWSK.P	383.467	367.81	364.646	156.322	146.483	176.608	26.6344	9.25336	19.0486	2.84173	3.00716	0
sp|Q01574|ACS1_YEAST	ACS1	Acetyl-coenzyme A synthetase 1	0	U	K.ILAGESDQLGDVSTLSNPGIVR.H	21.2769	19.1677	16.2505	16.3154	10.4149	19.3237	3.27402	5.64455	4.72336	2.72349	0	5.16431
sp|Q01574|ACS1_YEAST	ACS1	Acetyl-coenzyme A synthetase 1	0	U	-.MSPSAVQSSK.L	132.768	113.895	125.13	3.29032	1.37028	5.12348	3.90825	4.49095	6.53794	3.2656	0	2.85204
sp|Q01574|ACS1_YEAST	ACS1	Acetyl-coenzyme A synthetase 1	0	U	K.LIILVDDLPK.T	326.606	329.857	310.703	152.564	140.344	150.266	13.9738	20.5683	20.5553	4.00003	6.93147	5.4795
sp|Q01574|ACS1_YEAST	ACS1	Acetyl-coenzyme A synthetase 1	0	U	R.IVDDALR.E	336.221	371.413	356.533	140.885	161.762	166.048	18.4588	13.785	18.8251	6.45876	4.60573	6.36053
sp|Q01574|ACS1_YEAST	ACS1	Acetyl-coenzyme A synthetase 1	0	U	K.VVITTDESNR.G	87.5506	87.2033	96.1249	25.8559	38.5504	38.8802	5.57872	8.15834	6.23056	2.22356	0	2.4302
sp|Q01574|ACS1_YEAST	ACS1	Acetyl-coenzyme A synthetase 1	0	U	R.INDGDSK.V	1392.85	1422.37	1478.96	633.851	665.852	699.182	61.7187	48.7606	89.8465	17.397	7.69261	10.4664
sp|Q01574|ACS1_YEAST	ACS1	Acetyl-coenzyme A synthetase 1	0	U	K.TNNPSVAFHAPR.D	279.361	233.095	244.997	137.3	145.454	128.981	16.4828	14.3356	23.9785	31.1686	23.446	20.4743
sp|Q01574|ACS1_YEAST	ACS1	Acetyl-coenzyme A synthetase 1	0	U	K.VVITTDESNR.G	114.163	119.505	111.636	41.7266	43.9626	49.0806	9.67151	4.73851	11.9663	2.68469	2.9663	0
sp|Q01574|ACS1_YEAST	ACS1	Acetyl-coenzyme A synthetase 1	0	U	R.AGDSYIENHSLK.S	1211.43	1123.63	1131.28	669.386	604.165	623.411	144.616	120.637	169.892	107.455	99.5733	98.404
sp|Q01574|ACS1_YEAST	ACS1	Acetyl-coenzyme A synthetase 1	0	U	K.M*SQSAATAQQK.K	56.1419	40.5288	41.7735	5.64711	3.52206	7.07373	0	0	0.0127741	0.0206288	0	0
sp|Q01574|ACS1_YEAST	ACS1	Acetyl-coenzyme A synthetase 1	0	U	K.ILAGESDQLGDVSTLSNPGIVR.H	140.341	151.548	134.701	73.8389	86.4281	89.6081	41.2979	30.4921	37.8533	22.3052	26.4183	24.3342
sp|Q01574|ACS1_YEAST	ACS1	Acetyl-coenzyme A synthetase 1	0	U	K.VFIPDPK.T	124.532	124.318	141.39	63.7741	61.2828	62.1147	12.5901	3.67413	7.97607	3.25184	3.40489	3.89171
sp|Q01574|ACS1_YEAST	ACS1	Acetyl-coenzyme A synthetase 1	0	U	R.DLDWATEK.K	563.636	555.383	561.623	272.414	284.821	270.277	44.3235	48.651	63.5862	33.7069	29.2729	33.6823
sp|Q01574|ACS1_YEAST	ACS1	Acetyl-coenzyme A synthetase 1	0	U	R.YLDTYLNPYPGYYFTGDGAAK.D	53.5073	55.953	60.9953	36.887	32.2131	31.1175	8.44013	9.19376	7.66341	4.55474	4.09856	2.60426
sp|Q01574|ACS1_YEAST	ACS1	Acetyl-coenzyme A synthetase 1	0	U	K.ILAGESDQLGDVSTLSNPGIVR.H	29.8583	29.3534	26.3754	17.9379	17.8023	19.9462	7.20315	12.2249	8.80502	11.1711	6.15301	4.06866
sp|Q01574|ACS1_YEAST	ACS1	Acetyl-coenzyme A synthetase 1	0	U	K.IVPQRPISDR.L	37.2091	44.1075	42.5609	18.042	15.199	18.7522	1.93446	3.96487	3.29614	0	0	0.0152752
sp|Q01574|ACS1_YEAST	ACS1	Acetyl-coenzyme A synthetase 1	0	U	K.IVPQRPISDR.L	716.73	686.028	684.913	307.763	285.58	283.88	49.8657	55.1068	63.16	14.79	6.76575	7.76077
sp|Q01574|ACS1_YEAST	ACS1	Acetyl-coenzyme A synthetase 1	0	U	R.LQPAIATHYSPHLDGLQDYQR.L	76.219	59.8903	62.6776	65.2449	39.78	39.886	8.95473	10.5879	16.7301	4.29219	5.5014	6.49752
sp|Q01574|ACS1_YEAST	ACS1	Acetyl-coenzyme A synthetase 1	0	U	K.MSQSAATAQQK.K	2222.45	2347.58	2177.35	1283.33	1264.75	1332.79	142.313	144.242	179.959	32.6375	21.28	25.7586
sp|Q01574|ACS1_YEAST	ACS1	Acetyl-coenzyme A synthetase 1	0	U	K.ESIEDPAK.F	982.854	1089.23	910.983	462.547	408.836	486.616	52.9212	56.3938	57.6046	8.5037	7.09418	4.49764
sp|Q01574|ACS1_YEAST	ACS1	Acetyl-coenzyme A synthetase 1	0	U	K.IVPQRPISDR.L	273.386	249.291	252.559	111.991	107.891	116.887	17.9427	22.8473	24.0259	8.04133	8.17532	4.38586
sp|Q01574|ACS1_YEAST	ACS1	Acetyl-coenzyme A synthetase 1	0	U	K.MSQSAATAQQK.K	791.501	831.902	829.9	474.665	430.183	457.65	51.3469	47.57	71.7037	12.7772	11.7577	15.2858
sp|Q01574|ACS1_YEAST	ACS1	Acetyl-coenzyme A synthetase 1	0	U	K.AIIFEGDEPGQGYSITYK.E	196.193	179.608	177.671	82.9858	86.319	81.057	22.2706	16.8926	16.5748	12.4604	10.2214	10.7156
sp|Q01574|ACS1_YEAST	ACS1	Acetyl-coenzyme A synthetase 1	0	U	K.AIIFEGDEPGQGYSITYK.E	528.218	504.791	470.401	211.104	216.464	225.903	28.293	29.385	35.3862	9.20244	12.1721	10.5064
sp|Q01574|ACS1_YEAST	ACS1	Acetyl-coenzyme A synthetase 1	0	U	K.LEEQSSEIDK.L	115.504	107.952	119.142	50.897	60.1932	56.6082	5.7641	3.28506	8.55463	0	0	0.016461
sp|Q01574|ACS1_YEAST	ACS1	Acetyl-coenzyme A synthetase 1	0	U	K.SSWSTATDDELQDIKK.H	147.546	105.34	110.421	95.2958	86.2609	79.5591	6.52238	7.18542	16.0266	7.46379	3.16245	3.15571
sp|Q01574|ACS1_YEAST	ACS1	Acetyl-coenzyme A synthetase 1	0	U	K.LEEQSSEIDK.L	263.027	266.007	266.968	170.666	138.136	149.071	43.6911	38.6226	45.988	25.2898	28.2175	24.0019
sp|Q01574|ACS1_YEAST	ACS1	Acetyl-coenzyme A synthetase 1	0	U	K.M*SQSAATAQQK.K	94.2096	88.2673	84.1617	9.99705	13.7733	15.4342	2.64142	4.45543	0	0	0.00886057	2.55577
sp|Q01574|ACS1_YEAST	ACS1	Acetyl-coenzyme A synthetase 1	0	U	K.TNNPSVAFHAPR.D	85.5475	60.6961	75.9496	39.1962	35.8564	42.2568	3.87095	0.114067	4.80715	0	0	0.00426616
sp|Q01574|ACS1_YEAST	ACS1	Acetyl-coenzyme A synthetase 1	0	U	K.AIIFEGDEPGQGYSITYK.E	57.8712	62.7123	55.0756	32.8188	42.4185	40.5148	16.6291	19.2717	15.0591	15.8974	12.0065	13.7699
sp|Q01574|ACS1_YEAST	ACS1	Acetyl-coenzyme A synthetase 1	0	U	K.DKDGYIWILGR.V	86.6197	98.6842	81.9873	77.0236	58.4605	52.9883	18.5192	9.4828	13.0142	3.34065	0	4.32093
sp|Q01574|ACS1_YEAST	ACS1	Acetyl-coenzyme A synthetase 1	0	U	K.VFIPDPK.T	222.607	217.867	203.308	90.7133	90.8363	95.0539	22.6774	12.4005	12.9291	9.24076	8.34884	4.69631
sp|Q01574|ACS1_YEAST	ACS1	Acetyl-coenzyme A synthetase 1	0	U	K.LEEQSSEIDK.L	36.7391	34.4201	38.9533	13.1596	18.9021	18.3385	0.876829	1.91698	0	0	0.00485343	0.00827971
sp|Q01574|ACS1_YEAST	ACS1	Acetyl-coenzyme A synthetase 1	0	U	R.HLIDSVK.L	438.247	453.744	429.912	306.658	288.891	305.427	74.9579	80.0393	79.7422	46.4456	32.952	45.3208
sp|Q01574|ACS1_YEAST	ACS1	Acetyl-coenzyme A synthetase 1	0	U	R.HLIDSVK.L	2439.5	2639.23	2268.66	1721.7	1589.21	1664.66	316.591	319.742	350.289	45.2311	38.9795	40.8408
sp|Q01574|ACS1_YEAST	ACS1	Acetyl-coenzyme A synthetase 1	0	U	R.AGDSYIENHSLK.S	379.164	310.829	356.385	191.453	158.581	168.799	29.5036	21.8259	25.9693	11.4393	9.32161	10.0952
sp|Q01574|ACS1_YEAST	ACS1	Acetyl-coenzyme A synthetase 1	0	U	R.DLDWATEK.K	638.737	880.851	601.997	335.141	330.491	428.441	38.9232	43.0328	54.3057	21.8942	13.7606	12.3486
sp|Q01574|ACS1_YEAST	ACS1	Acetyl-coenzyme A synthetase 1	0	U	R.DLDWATEK.K	574.168	525.079	615.414	261.108	307.733	264.145	38.3573	40.5813	47.4158	19.0405	18.2661	21.4957
sp|Q01574|ACS1_YEAST	ACS1	Acetyl-coenzyme A synthetase 1	0	U	R.LQPAIATHYSPHLDGLQDYQR.L	69.7523	60.7301	61.4717	34.1258	31.3608	35.4603	9.6087	6.64636	10.9661	0	2.52385	5.98551
sp|Q01574|ACS1_YEAST	ACS1	Acetyl-coenzyme A synthetase 1	0	U	K.VFIPDPK.T	286.946	296.971	307.593	124.426	133.711	138.571	12.3107	5.51015	21.307	0	1.86335	0.031595
sp|Q01574|ACS1_YEAST	ACS1	Acetyl-coenzyme A synthetase 1	0	U	K.M*SQSAATAQQK.K	706.151	698.88	737.924	374.914	365.895	388.989	47.4361	41.9385	56.6107	4.39235	6.96866	7.08997
sp|Q01574|ACS1_YEAST	ACS1	Acetyl-coenzyme A synthetase 1	0	U	K.MSQSAATAQQK.K	423.487	428.909	451.685	246.87	216.777	235.601	26.9045	20.4322	34.7182	4.5626	0	2.75425
sp|Q01574|ACS1_YEAST	ACS1	Acetyl-coenzyme A synthetase 1	0	U	K.EHEYEHLTSVK.I	896.288	841.207	876.56	519.441	497.539	476.238	88.1313	71.5957	105.757	22.486	17.5862	16.9813
sp|Q01574|ACS1_YEAST	ACS1	Acetyl-coenzyme A synthetase 1	0	U	K.VVITTDESNR.G	259.251	256.441	264.633	110.304	101.62	104.54	17.6389	11.0106	17.9763	3.08306	0	0
sp|Q01574|ACS1_YEAST	ACS1	Acetyl-coenzyme A synthetase 1	0	U	K.LEEQSSEIDK.L	46.9578	45.844	57.6071	23.9518	29.0132	29.8069	3.26754	2.45136	3.22703	0	0	0.0111866
sp|Q01574|ACS1_YEAST	ACS1	Acetyl-coenzyme A synthetase 1	0	U	R.YWDIIDEHK.V	145.838	162.861	149.484	80.0328	92.9974	83.5864	29.6514	27.1296	30.3966	35.6825	29.1389	30.8698
sp|Q01574|ACS1_YEAST	ACS1	Acetyl-coenzyme A synthetase 1	0	U	R.YWDIIDEHK.V	264.352	266.162	245.041	129.07	129.221	129.727	36.4293	30.1425	44.4986	37.1335	25.0076	23.6873
sp|Q01574|ACS1_YEAST	ACS1	Acetyl-coenzyme A synthetase 1	0	U	K.LIILVDDLPK.T	61.8795	59.4712	43.891	25.0107	32.536	24.8406	4.54132	8.79325	9.51062	32.3057	116.512	5.79805
sp|Q01574|ACS1_YEAST	ACS1	Acetyl-coenzyme A synthetase 1	0	U	-.MSPSAVQSSK.L	236.634	230.89	224.692	0	0	6.75934	7.72696	4.44588	3.15379	3.36963	0	0
sp|P52910|ACS2_YEAST	ACS2	Acetyl-coenzyme A synthetase 2	0	U	K.VVYEAHNVK.A	110.594	101.101	113.527	143.316	134.326	142.506	305.612	297.473	347.128	139.155	155.664	176.173
sp|P52910|ACS2_YEAST	ACS2	Acetyl-coenzyme A synthetase 2	0	U	K.YDTSSLR.V	77.0985	69.1595	75.0505	111.807	123.968	117.324	225.987	228.238	242.354	116.053	135.376	135.861
sp|P52910|ACS2_YEAST	ACS2	Acetyl-coenzyme A synthetase 2	0	U	K.APQHFYNSQPGK.G	187.462	173.866	194.176	212.21	220.372	222.199	475.583	430.95	511.247	244.701	254.725	279.961
sp|P52910|ACS2_YEAST	ACS2	Acetyl-coenzyme A synthetase 2	0	U	K.ATHFYVAPTALR.L	40.9413	41.5428	40.9003	44.259	46.6116	49.8249	91.2548	92.314	91.5723	39.5568	41.3136	50.5092
sp|P52910|ACS2_YEAST	ACS2	Acetyl-coenzyme A synthetase 2	0	U	K.EYLHWDAPYTK.V	6.38046	4.56657	6.74286	6.43066	9.41061	6.00135	14.7131	14.4156	13.4306	9.66087	9.5811	8.0161
sp|P52910|ACS2_YEAST	ACS2	Acetyl-coenzyme A synthetase 2	0	U	K.IVDEGLNGVDLVSR.I	22.4123	18.2694	23.0687	26.6089	25.7251	30.8438	44.7192	51.5733	55.6369	27.2914	24.802	25.2191
sp|P52910|ACS2_YEAST	ACS2	Acetyl-coenzyme A synthetase 2	0	U	K.IVDEGLNGVDLVSR.I	66.5384	62.7194	56.6705	76.2183	78.1933	81.2397	152.346	157.174	152.165	84.1631	75.5696	81.4281
sp|P52910|ACS2_YEAST	ACS2	Acetyl-coenzyme A synthetase 2	0	U	K.IVDEGLNGVDLVSR.I	42.9973	42.5805	45.3315	47.7031	58.2926	46.3632	92.2204	112.534	104.198	56.5223	57.4421	51.1053
sp|P52910|ACS2_YEAST	ACS2	Acetyl-coenzyme A synthetase 2	0	U	R.VLGSVGEPISPDLWEWYHEK.V	10.156	11.6971	11.9417	9.7816	12.6503	9.30354	38.1062	31.0802	40.5076	20.5952	18.1283	22.216
sp|P52910|ACS2_YEAST	ACS2	Acetyl-coenzyme A synthetase 2	0	U	R.HAFANPDKPALIYEADDESDNKIITFGELLR.K	7.26914	12.5761	11.057	20.0691	17.196	17.1716	13.442	10.1331	11.9921	8.56766	8.82271	4.76883
sp|P52910|ACS2_YEAST	ACS2	Acetyl-coenzyme A synthetase 2	0	U	R.VLGSVGEPISPDLWEWYHEK.V	9.16895	9.12227	8.41738	9.69816	12.1048	11.8121	26.7565	28.6088	21.5647	18.276	14.2049	15.9973
sp|P52910|ACS2_YEAST	ACS2	Acetyl-coenzyme A synthetase 2	0	U	R.VGEAEIAK.Y	49.0718	54.9011	54.1764	72.3112	64.4026	63.3864	114.785	106.293	122.686	62.0953	57.2653	65.1018
sp|P52910|ACS2_YEAST	ACS2	Acetyl-coenzyme A synthetase 2	0	U	R.DYWWHEEAAK.Q	246.373	235.021	248.142	310.22	324.783	307.367	625.935	591.987	626.062	316.518	335.938	341.087
sp|P52910|ACS2_YEAST	ACS2	Acetyl-coenzyme A synthetase 2	0	U	K.VQSGSLNNGDVAWFLNGK.L	23.325	21.2322	25.0037	28.7537	29.3541	26.4051	46.8283	47.7515	35.089	26.2717	21.5597	29.0033
sp|P52910|ACS2_YEAST	ACS2	Acetyl-coenzyme A synthetase 2	0	U	K.VQSGSLNNGDVAWFLNGK.L	35.9447	27.2089	34.8587	37.7763	38.3766	36.9858	57.413	47.6047	57.9402	28.3908	32.3588	37.1687
sp|P52910|ACS2_YEAST	ACS2	Acetyl-coenzyme A synthetase 2	0	U	R.HAFANPDKPALIYEADDESDNK.I	84.9311	75.4364	86.8865	167.677	143.953	139.38	169.512	147.592	231.716	97.3951	109.45	109.914
sp|P52910|ACS2_YEAST	ACS2	Acetyl-coenzyme A synthetase 2	0	U	R.TGTEGIPMK.A	70.0979	77.8005	72.3018	102.405	113.729	101.079	196.211	194.748	174.966	96.4925	110.464	90.382
sp|P52910|ACS2_YEAST	ACS2	Acetyl-coenzyme A synthetase 2	0	U	K.VSQIAGVLK.S	31.8278	27.1244	29.7295	41.9811	42.8308	41.2389	46.2508	40.1047	49.5092	37.0428	36.0715	31.8983
sp|P52910|ACS2_YEAST	ACS2	Acetyl-coenzyme A synthetase 2	0	U	R.ELILQVR.G	43.0899	41.3104	33.4276	42.3041	50.1243	44.4678	114.047	113.609	97.1093	74.9862	64.4302	54.8533
sp|P52910|ACS2_YEAST	ACS2	Acetyl-coenzyme A synthetase 2	0	U	K.IITFGELLR.K	86.6393	89.3385	91.3048	87.5301	103.418	109.137	187.217	187.424	167.328	94.106	90.6992	97.111
sp|P52910|ACS2_YEAST	ACS2	Acetyl-coenzyme A synthetase 2	0	U	K.VVYEAHNVK.A	219.732	184.057	194.814	269.768	231.241	230.517	609.285	561.836	642.304	283.803	295.114	317.992
sp|P52910|ACS2_YEAST	ACS2	Acetyl-coenzyme A synthetase 2	0	U	R.HAFANPDKPALIYEADDESDNK.I	330.067	289.632	259.517	622.636	504.051	549.354	551.235	566.838	671.734	358.063	344.866	431.274
sp|P52910|ACS2_YEAST	ACS2	Acetyl-coenzyme A synthetase 2	0	U	K.VSQIAGVLK.S	114.164	119.285	126.615	108.477	126.896	126.004	179.358	177.068	167.408	88.9608	93.8255	91.2892
sp|P52910|ACS2_YEAST	ACS2	Acetyl-coenzyme A synthetase 2	0	U	K.GYVTDMQHYQEM*YQQSINEPEK.F	71.16	49.0092	61.0565	75.2323	78.8978	80.382	186.825	178.933	197.994	90.9365	103.691	102.143
sp|P52910|ACS2_YEAST	ACS2	Acetyl-coenzyme A synthetase 2	0	U	K.GYVTDM*QHYQEMYQQSINEPEK.F	20.1306	22.7633	22.8566	28.0606	28.0424	35.5891	74.4358	62.6836	74.8963	39.8497	32.092	33.6224
sp|P52910|ACS2_YEAST	ACS2	Acetyl-coenzyme A synthetase 2	0	U	K.DGYLQNNATEGDAEHITPDNLR.R	25.1065	23.7431	20.2797	42.3278	43.0401	31.6515	98.3506	100.263	106.385	53.2898	59.1976	58.7592
sp|P52910|ACS2_YEAST	ACS2	Acetyl-coenzyme A synthetase 2	0	U	R.RELILQVR.G	8.39405	11.7256	9.39311	16.3656	12.0568	20.4727	54.0697	48.1311	48.601	20.8805	23.5023	21.2968
sp|P52910|ACS2_YEAST	ACS2	Acetyl-coenzyme A synthetase 2	0	U	K.VVYEAHNVK.A	6.18742	13.0699	12.9434	15.3967	14.4659	16.5442	28.2704	36.4016	38.5391	13.5063	11.2882	14.4753
sp|P52910|ACS2_YEAST	ACS2	Acetyl-coenzyme A synthetase 2	0	U	K.IVDEGLNGVDLVSR.I	11.9712	8.03719	9.69724	14.5453	15.3461	8.82869	22.9656	24.412	21.3194	11.6126	14.4845	15.9299
sp|P52910|ACS2_YEAST	ACS2	Acetyl-coenzyme A synthetase 2	0	U	K.IVDEGLNGVDLVSR.I	6.18284	6.49487	9.27621	7.57514	7.8753	10.4045	14.8143	10.0691	11.5405	10.7631	8.36219	6.67962
sp|P52910|ACS2_YEAST	ACS2	Acetyl-coenzyme A synthetase 2	0	U	R.SVWNHHDR.Y	54.2543	41.8262	43.2372	126.344	92.6661	88.7402	192.294	170.285	249.295	107.858	112.073	139.61
sp|P52910|ACS2_YEAST	ACS2	Acetyl-coenzyme A synthetase 2	0	U	R.GEIGPFASPK.T	93.1877	85.9401	72.0475	88.7366	91.9274	99.9031	255.473	234.63	232.96	116.19	134.53	134.433
sp|P52910|ACS2_YEAST	ACS2	Acetyl-coenzyme A synthetase 2	0	U	K.GYVTDM*QHYQEMYQQSINEPEK.F	23.5722	16.0981	18.0817	11.5203	14.4362	12.3046	44.4979	44.4383	46.7657	25.3471	18.6265	22.2135
sp|P52910|ACS2_YEAST	ACS2	Acetyl-coenzyme A synthetase 2	0	U	R.DYWWHEEAAK.Q	56.1477	45.6024	49.7211	58.7348	59.0731	48.9295	109.642	107.407	86.7077	51.8633	46.7113	55.3388
sp|P52910|ACS2_YEAST	ACS2	Acetyl-coenzyme A synthetase 2	0	U	K.VQSGSLNNGDVAWFLNGK.L	81.6268	66.8334	67.7984	93.155	88.3329	82.8147	134.579	135.297	154.077	80.9548	68.6489	85.9283
sp|P52910|ACS2_YEAST	ACS2	Acetyl-coenzyme A synthetase 2	0	U	R.DYWWHEEAAK.Q	703.068	743.346	646.136	946.268	922.439	934.115	1808.85	1951.28	1708	1050.52	947.952	1054.05
sp|P52910|ACS2_YEAST	ACS2	Acetyl-coenzyme A synthetase 2	0	U	K.DGYLQNNATEGDAEHITPDNLR.R	12.6823	9.57857	7.27989	11.8659	12.2181	9.91527	27.3036	25.7154	30.3568	14.3054	17.2527	17.9045
sp|P52910|ACS2_YEAST	ACS2	Acetyl-coenzyme A synthetase 2	0	U	R.HAFANPDKPALIYEADDESDNK.I	85.2895	67.2855	71.3492	149.713	137.935	119.915	154.846	126.951	186.409	77.6736	95.2622	104.087
sp|P52910|ACS2_YEAST	ACS2	Acetyl-coenzyme A synthetase 2	0	U	R.HAFANPDKPALIYEADDESDNK.I	148.582	117.679	127.63	267.01	211.254	214.367	290.247	204.942	320.711	144.429	146.6	175.099
sp|P52910|ACS2_YEAST	ACS2	Acetyl-coenzyme A synthetase 2	0	U	R.DHDGYYWIR.G	26.8353	27.9981	25.462	43.9018	58.2789	41.1254	114.188	118.755	117.25	66.0016	58.1626	58.4892
sp|P52910|ACS2_YEAST	ACS2	Acetyl-coenzyme A synthetase 2	0	U	R.GEIGPFASPK.T	70.9383	62.6404	58.8505	70.6127	81.9799	66.4993	189.74	183.538	194.27	80.553	114.774	109.196
sp|P52910|ACS2_YEAST	ACS2	Acetyl-coenzyme A synthetase 2	0	U	R.ELILQVR.G	57.7231	50.4866	48.3809	63.7828	73.6273	71.4939	219.006	207.895	212.604	124.644	113.538	120.345
sp|P52910|ACS2_YEAST	ACS2	Acetyl-coenzyme A synthetase 2	0	U	R.ELILQVR.G	13.0383	13.4478	8.73829	17.8335	20.5319	16.5814	50.6507	45.4859	47.6121	32.0476	26.1536	29.9717
sp|P52910|ACS2_YEAST	ACS2	Acetyl-coenzyme A synthetase 2	0	U	K.KIVDEGLNGVDLVSR.I	44.1468	55.9528	44.8907	79.4393	74.0654	70.9099	97.2117	62.0215	89.9788	53.8161	43.7525	50.1117
sp|P60010|ACT_YEAST	ACT1	Actin	0	U	K.DSYVGDEAQSK.R	77.0452	72.7737	63.6007	6.5404	12.0526	6.69491	7.42814	8.74808	8.27603	2.9443	0	4.24962
sp|P60010|ACT_YEAST	ACT1	Actin	0	U	R.HQGIMVGMGQK.D	331.544	374.652	371.27	441.044	415.208	428.944	400.108	395.753	395.023	378.008	380.104	336.35
sp|P60010|ACT_YEAST	ACT1	Actin	0	U	R.YPIEHGIVTNWDDMEK.I	96.9895	104.781	112.341	97.8864	94.5308	112.038	68.2453	73.452	78.3727	72.5884	78.895	75.9556
sp|P60010|ACT_YEAST	ACT1	Actin	0	U	K.AGFAGDDAPR.A	75.8116	78.7523	75.4572	87.8914	93.2942	88.3008	59.4169	60.7933	60.334	57.8685	53.459	53.1104
sp|P60010|ACT_YEAST	ACT1	Actin	0	U	R.HQGIMVGM*GQK.D	178.324	147.634	158.79	83.5582	121.21	81.6089	91.4101	95.6588	95.4415	95.8918	75.7591	79.6672
sp|P60010|ACT_YEAST	ACT1	Actin	0	U	K.QEYDESGPSIVHHK.C	115.279	110.708	89.4975	142.657	144.912	129.93	88.9105	103.49	102.084	89.5175	81.34	130.578
sp|P60010|ACT_YEAST	ACT1	Actin	0	U	K.QEYDESGPSIVHHK.C	17.3758	11.528	12.2105	22.9361	21.7671	15.7475	10.5057	12.0896	13.3642	12.727	9.00793	18.2695
sp|P60010|ACT_YEAST	ACT1	Actin	0	U	K.DSYVGDEAQSK.R	17.5341	16.3165	15.5907	21.1607	13.9535	17.2112	9.9813	17.545	11.9957	12.0262	15.9398	14.6995
sp|P60010|ACT_YEAST	ACT1	Actin	0	U	R.DLTDYLM*K.I	44.8471	41.3282	47.5915	52.0669	39.3403	44.5705	40.7015	41.3916	35.8328	41.4208	46.3388	44.4633
sp|P60010|ACT_YEAST	ACT1	Actin	0	U	K.EITALAPSSMK.V	185.402	182.754	191.21	218.526	214.32	205.511	178.765	151.113	173.5	170.551	188.592	174.563
sp|P60010|ACT_YEAST	ACT1	Actin	0	U	R.GYSFSTTAER.E	41.1143	40.7404	34.7025	37.524	40.8497	42.003	31.1106	27.3346	31.1129	34.1501	30.9162	32.8882
sp|P60010|ACT_YEAST	ACT1	Actin	0	U	K.IWHHTFYNELR.V	54.1332	40.1236	48.4891	75.455	44.005	47.0266	44.0747	31.6821	62.5078	49.1659	48.7428	69.5198
sp|P60010|ACT_YEAST	ACT1	Actin	0	U	K.DSYVGDEAQSK.R	65.0568	63.0973	53.2717	58.5158	60.5954	68.0732	53.7454	51.3979	47.382	43.6214	56.2098	43.4344
sp|P60010|ACT_YEAST	ACT1	Actin	0	U	R.HQGIMVGM*GQK.D	453.009	498.051	502.844	586.772	564.65	577.675	463.906	450.16	483.801	449.226	430.867	439.974
sp|P60010|ACT_YEAST	ACT1	Actin	0	U	K.IIAPPER.K	94.3398	102.4	100.406	104.988	95.873	101.876	79.7242	78.0444	74.356	84.9268	78.2466	76.6433
sp|P60010|ACT_YEAST	ACT1	Actin	0	U	R.YPIEHGIVTNWDDM*EK.I	37.1924	30.2308	30.2535	21.6866	32.4137	19.2279	22.1269	21.0173	22.5939	24.2241	15.7882	22.392
sp|P60010|ACT_YEAST	ACT1	Actin	0	U	R.YPIEHGIVTNWDDM*EK.I	31.2104	30.3962	34.5486	17.6802	27.2235	25.9382	20.0412	27.9917	20.7183	25.73	23.5904	26.8674
sp|P60010|ACT_YEAST	ACT1	Actin	0	U	R.VAPEEHPVLLTEAPM*NPK.S	68.1078	48.0674	55.3219	33.0143	39.9085	36.5155	49.9327	43.1068	43.1789	48.3287	46.5421	45.4853
sp|P60010|ACT_YEAST	ACT1	Actin	0	U	R.YPIEHGIVTNWDDM*EK.I	18.9768	22.3116	18.9714	15.5777	14.8194	21.2707	22.5821	24.4429	19.845	15.3771	17.294	21.5898
sp|P60010|ACT_YEAST	ACT1	Actin	0	U	R.YPIEHGIVTNWDDM*EK.I	42.6129	37.3217	31.6846	34.8142	40.8331	39.9363	41.7019	45.0836	41.4635	41.5765	41.1861	27.5734
sp|P60010|ACT_YEAST	ACT1	Actin	0	U	R.YPIEHGIVTNWDDM*EK.I	15.8395	14.0359	15.4145	9.65995	9.60779	15.447	11.4626	7.42596	11.5132	13.085	10.632	13.174
sp|P60010|ACT_YEAST	ACT1	Actin	0	U	R.YPIEHGIVTNWDDM*EK.I	18.8189	18.354	24.2142	22.6806	17.876	26.947	18.014	17.3896	26.571	22.0442	22.1344	17.4298
sp|P60010|ACT_YEAST	ACT1	Actin	0	U	K.DSYVGDEAQSK.R	1049.22	1333.42	1005.31	1526.02	1275.89	1608.91	961.434	1246.81	937.262	1191.01	941.543	1080.44
sp|P60010|ACT_YEAST	ACT1	Actin	0	U	R.HQGIM*VGM*GQK.D	104.884	49.9302	45.6013	34.674	86.9429	34.7587	18.9613	28.3252	20.8161	28.5477	15.8647	18.5497
sp|P60010|ACT_YEAST	ACT1	Actin	0	U	R.YPIEHGIVTNWDDM*EK.I	9.52198	11.4789	10.5288	11.368	10.187	12.7203	7.90919	9.36977	7.86193	8.08215	7.91679	9.5485
sp|P60010|ACT_YEAST	ACT1	Actin	0	U	K.AGFAGDDAPR.A	310.636	326.668	333.084	372.068	336.035	357.503	310.525	297.56	303.683	275.007	275.046	286.573
sp|P60010|ACT_YEAST	ACT1	Actin	0	U	K.DSYVGDEAQSK.R	1286.47	1245.18	1349.81	1538.91	1480.66	1498.15	1189.41	1112.03	1227.46	1187.59	1220.08	1150.2
sp|P60010|ACT_YEAST	ACT1	Actin	0	U	R.YPIEHGIVTNWDDMEK.I	37.8371	42.9471	45.4298	58.5648	46.7552	53.1932	30.6459	32.4602	35.8994	30.1741	34.1298	29.912
sp|P60010|ACT_YEAST	ACT1	Actin	0	U	R.VAPEEHPVLLTEAPM*NPK.S	55.6828	53.9062	49.5388	44.773	52.9889	49.082	28.4633	38.4985	43.7636	44.9249	44.1998	37.4264
sp|P60010|ACT_YEAST	ACT1	Actin	0	U	R.HQGIMVGM*GQK.D	40.2504	53.4669	46.3296	41.4414	47.0589	51.9293	44.7251	44.3478	36.1773	33.5465	47.0524	37.5274
sp|P60010|ACT_YEAST	ACT1	Actin	0	U	K.IIAPPER.K	224.251	231.171	241.701	257.983	241.857	230.488	198.92	204.448	169.588	204.997	189.631	174.125
sp|P60010|ACT_YEAST	ACT1	Actin	0	U	R.VAPEEHPVLLTEAPM*NPK.S	23.9102	27.052	21.5344	21.5492	28.01	26.2361	22.5578	24.5081	17.8111	18.8692	19.0788	16.2515
sp|P60010|ACT_YEAST	ACT1	Actin	0	U	K.AGFAGDDAPR.A	237.831	252.667	236.668	252.05	260.133	251.884	208.653	211.778	208.574	200.784	202.744	201.055
sp|P60010|ACT_YEAST	ACT1	Actin	0	U	K.DSYVGDEAQSK.R	594.372	589.772	613.443	693.294	691.568	689.29	532.832	513.587	535.406	506.489	531.67	510.195
sp|P60010|ACT_YEAST	ACT1	Actin	0	U	K.DSYVGDEAQSK.R	129.605	112.73	131.901	171.181	175.121	153.631	115.821	117.146	117.868	117.265	130.029	118.801
sp|P60010|ACT_YEAST	ACT1	Actin	0	U	R.DLTDYLMK.I	102.825	102.983	107.66	68.2201	65.1033	56.0741	45.1459	45.0233	45.0661	29.8226	33.0155	31.2725
sp|P60010|ACT_YEAST	ACT1	Actin	0	U	R.GYSFSTTAER.E	25.491	25.7914	26.5674	30.2557	33.4838	31.8169	18.655	21.2329	24.3432	20.4559	19.6403	20.6877
sp|P60010|ACT_YEAST	ACT1	Actin	0	U	K.QEYDESGPSIVHHK.C	73.8307	55.7163	67.6581	107.216	96.3462	80.2567	68.7222	65.8305	72.6263	55.4688	80.0321	88.3059
sp|P60010|ACT_YEAST	ACT1	Actin	0	U	R.VAPEEHPVLLTEAPMNPK.S	164.929	179.083	179.861	165.201	193.458	169.923	135.632	151.916	160.18	158.724	145.702	153.165
sp|P60010|ACT_YEAST	ACT1	Actin	0	U	K.IIAPPERK.Y	4.66209	16.4725	17.0735	11.5159	10.1278	12.8441	17.019	13.5583	8.80784	12.6075	6.84	6.32864
sp|P60010|ACT_YEAST	ACT1	Actin	0	U	K.EITALAPSSMK.V	94.142	93.4472	91.7194	116.946	97.733	101.258	87.9534	96.5087	89.3095	99.5194	92.5271	91.0718
sp|P60010|ACT_YEAST	ACT1	Actin	0	U	R.VAPEEHPVLLTEAPM*NPK.S	92.9856	82.3871	88.0428	56.9479	65.4306	62.4285	78.3128	63.0407	68.6606	66.6268	73.057	66.9821
sp|P60010|ACT_YEAST	ACT1	Actin	0	U	R.YPIEHGIVTNWDDM*EK.I	32.1535	36.1661	22.1677	21.8413	39.2347	37.6587	29.4547	26.0387	24.5814	21.7005	18.4682	24.3286
sp|P60010|ACT_YEAST	ACT1	Actin	0	U	R.VAPEEHPVLLTEAPMNPK.S	58.0361	76.4233	53.2443	38.8976	47.733	48.8695	44.036	50.8071	36.7533	36.3365	39.3808	35.2799
sp|P60010|ACT_YEAST	ACT1	Actin	0	U	R.YPIEHGIVTNWDDM*EK.I	24.3167	28.7059	26.813	16.7175	30.5887	27.2425	25.4194	26.849	25.3592	23.2445	21.9572	23.9258
sp|P60010|ACT_YEAST	ACT1	Actin	0	U	K.DSYVGDEAQSK.R	224.981	232.367	226.758	240.646	248.989	252.331	202.45	191.462	178.593	198.191	197.092	181.545
sp|P60010|ACT_YEAST	ACT1	Actin	0	U	K.AGFAGDDAPR.A	234.414	240.379	245.228	275.714	255.039	265.642	240.555	232.825	228.293	212.24	227.254	231.772
sp|P60010|ACT_YEAST	ACT1	Actin	0	U	K.DSYVGDEAQSK.R	38.4197	41.4949	39.4654	52.4432	41.4212	48.3267	37.4554	34.9718	42.6063	41.3382	34.7008	36.0234
sp|P60010|ACT_YEAST	ACT1	Actin	0	U	K.EITALAPSSM*K.V	315.108	271.659	247.126	138.477	169.661	142.796	153.914	189.714	175.75	168.077	152.061	149.197
sp|P60010|ACT_YEAST	ACT1	Actin	0	U	R.YPIEHGIVTNWDDM*EK.I	21.8753	24.8165	23.9836	28.4938	24.6783	25.4417	20.6225	21.1398	20.4659	17.6967	20.9496	20.6512
sp|P60010|ACT_YEAST	ACT1	Actin	0	U	R.YPIEHGIVTNWDDM*EK.I	32.4774	31.6138	27.1804	32.1593	35.7677	35.4332	31.1084	28.5301	24.5555	23.7066	25.1707	27.9104
sp|Q02336|ADA2_YEAST	ADA2	Transcriptional adapter 2	0	U	R.VMTAQDFEEFSK.D	101.301	108.176	102.252	107.941	112.455	105.012	159.58	171.428	172.534	195.996	216.056	199.001
sp|Q02336|ADA2_YEAST	ADA2	Transcriptional adapter 2	0	U	R.VMTAQDFEEFSK.D	4.53892	6.64734	8.49007	6.65161	7.12549	6.36547	17.0471	13.9715	18.0405	14.4455	20.3138	20.0911
sp|Q02336|ADA2_YEAST	ADA2	Transcriptional adapter 2	0	U	R.LLFENHLMDYR.K	93.8661	99.381	98.2696	119.019	110.386	122.219	109.885	113.266	120.542	146.378	135.051	146.213
sp|Q02336|ADA2_YEAST	ADA2	Transcriptional adapter 2	0	U	K.YYPIPDITQNIHVPQDEFLEQR.R	14.4545	12.0678	17.8023	18.699	22.8311	18.1926	26.396	26.0315	20.5233	24.0697	28.1533	31.2711
sp|Q02336|ADA2_YEAST	ADA2	Transcriptional adapter 2	0	U	K.DMVFEPDDQPLDIELK.F	14.3559	13.6283	10.5835	15.5767	16.0045	13.1486	7.4091	13.3967	8.96749	9.65455	9.15364	14.9006
sp|Q02336|ADA2_YEAST	ADA2	Transcriptional adapter 2	0	U	K.GAQTLGLGNWQDIADHIGSR.G	4.25712	8.51496	4.23683	9.41219	11.2116	12.8925	8.4716	11.5662	9.17072	15.9158	16.8833	16.4891
sp|Q02336|ADA2_YEAST	ADA2	Transcriptional adapter 2	0	U	R.LEFETEFENEAEGPVK.D	11.6768	7.12501	10.974	19.7503	14.5971	9.67893	20.1539	25.9521	17.7322	22.1951	24.0906	25.7078
sp|Q03233|ADD37_YEAST	ADD37	Alpha1-proteinase inhibitor-degradation deficient protein 37	0	U	K.ILQNEHTK.T	75.1042	64.2169	73.2841	112.235	108.384	104.194	265.81	279.349	259.101	234.664	228.495	225.093
sp|Q03233|ADD37_YEAST	ADD37	Alpha1-proteinase inhibitor-degradation deficient protein 37	0	U	R.LATEVLDLYGNTK.T	78.442	73.2846	73.858	116.384	99.7529	110.234	201.819	205.283	213.384	188.759	199.908	194.24
sp|Q03233|ADD37_YEAST	ADD37	Alpha1-proteinase inhibitor-degradation deficient protein 37	0	U	K.TVLSQIFNEK.D	13.8161	14.3315	21.3251	22.9129	22.8364	23.7568	64.6523	65.2155	51.197	44.0705	43.0257	52.7335
sp|Q03233|ADD37_YEAST	ADD37	Alpha1-proteinase inhibitor-degradation deficient protein 37	0	U	K.TVLSQIFNEK.D	30.2247	29.9362	33.5286	45.0671	52.2027	47.6059	110.748	119.284	110.338	118.373	100.059	100.73
sp|Q03233|ADD37_YEAST	ADD37	Alpha1-proteinase inhibitor-degradation deficient protein 37	0	U	R.LATEVLDLYGNTK.T	23.5259	20.643	22.8867	29.6348	29.6818	37.2928	67.6185	83.1657	72.8722	69.6102	67.0669	55.8152
sp|P36040|POC2_YEAST	ADD66	Proteasome assembly chaperone 2	0	U	K.YLVEFVGPLDRPEDGSDSLYK.D	12.1935	9.16847	13.1193	12.8129	14.3618	9.89992	7.10734	12.5147	10.7976	8.86156	9.02683	6.30824
sp|P36040|POC2_YEAST	ADD66	Proteasome assembly chaperone 2	0	U	K.YLVEFVGPLDRPEDGSDSLYK.D	22.0151	27.0548	29.4685	17.1341	23.3707	23.1219	16.6544	22.3054	17.9353	16.1543	22.7294	20.4641
sp|P36040|POC2_YEAST	ADD66	Proteasome assembly chaperone 2	0	U	K.FVRPISWQGAYGMADAR.D	10.3763	11.618	12.4907	10.7761	9.91615	8.59065	9.12227	12.78	10.9758	9.25422	8.00419	9.32218
sp|P36040|POC2_YEAST	ADD66	Proteasome assembly chaperone 2	0	U	K.ILFQILNASQRPK.A	298.026	286.942	277.02	298.76	279.052	291.992	360.691	330.271	408.704	297.42	313.286	349.527
sp|P36040|POC2_YEAST	ADD66	Proteasome assembly chaperone 2	0	U	K.YSSALEVFYNK.K	97.0746	89.7403	92.0416	76.1706	85.9225	78.9321	80.0393	84.1623	97.3922	77.1393	79.3918	86.429
sp|P36040|POC2_YEAST	ADD66	Proteasome assembly chaperone 2	0	U	K.YSSALEVFYNK.K	222.756	226.2	208.794	172.977	184.715	186.147	212.478	201.161	215.248	172.554	179.279	170.576
sp|P36040|POC2_YEAST	ADD66	Proteasome assembly chaperone 2	0	U	K.YLVEFVGPLDRPEDGSDSLYK.D	13.1578	10.2621	12.5317	10.6251	8.32025	10.368	11.9388	16.267	8.3477	8.32218	12.45	11.1882
sp|P27616|PUR7_YEAST	ADE1	Phosphoribosylaminoimidazole-succinocarboxamide synthase	0	U	K.VGESQDSYDK.Q	271.233	270.542	270.558	500.615	506.115	522.621	83.9638	82.3832	63.8287	281.411	276.275	237.447
sp|P27616|PUR7_YEAST	ADE1	Phosphoribosylaminoimidazole-succinocarboxamide synthase	0	U	K.YIEAYETLTGSK.W	11.8717	6.29153	13.2203	15.5294	16.3464	18.2193	4.64803	8.1696	4.41638	5.38435	8.08719	12.4005
sp|P27616|PUR7_YEAST	ADE1	Phosphoribosylaminoimidazole-succinocarboxamide synthase	0	U	K.MPQDIVDR.T	18.214	19.7497	25.8993	32.4648	36.5919	39.566	10.5682	7.6915	7.4046	21.2802	24.675	18.9731
sp|P27616|PUR7_YEAST	ADE1	Phosphoribosylaminoimidazole-succinocarboxamide synthase	0	U	R.NHLVDIAPGK.T	402.064	386.946	425.021	568.613	588.93	598.36	160.154	175.812	165.075	322.501	359.519	352.409
sp|P27616|PUR7_YEAST	ADE1	Phosphoribosylaminoimidazole-succinocarboxamide synthase	0	U	K.VGESQDSYDK.Q	70.2939	72.4193	65.1805	122.032	123.481	129.498	19.1253	21.3886	22.1399	57.6573	70.2935	62.6002
sp|P27616|PUR7_YEAST	ADE1	Phosphoribosylaminoimidazole-succinocarboxamide synthase	0	U	K.GIIIADTK.F	88.8586	91.3771	87.2464	150.575	149.244	147.944	29.3158	37.6585	39.8254	85.7576	69.0284	78.2672
sp|P27616|PUR7_YEAST	ADE1	Phosphoribosylaminoimidazole-succinocarboxamide synthase	0	U	K.GIIIADTK.F	150.334	148.631	154.266	213.706	235.415	226.326	59.6373	57.1858	53.9404	132.056	136.25	128.034
sp|P27616|PUR7_YEAST	ADE1	Phosphoribosylaminoimidazole-succinocarboxamide synthase	0	U	K.LNGVNGVK.M	54.4751	51.8794	49.7015	90.7435	91.5649	89.5588	15.1732	10.9318	13.3748	38.6091	45.3686	44.2964
sp|P27616|PUR7_YEAST	ADE1	Phosphoribosylaminoimidazole-succinocarboxamide synthase	0	U	K.AEQGEHDENISPAQAAELVGEDLSR.R	20.602	18.3284	17.229	28.9869	32.3908	25.496	6.31245	6.55222	10.0559	23.1236	20.4055	20.0505
sp|P27616|PUR7_YEAST	ADE1	Phosphoribosylaminoimidazole-succinocarboxamide synthase	0	U	K.FEFGIDEK.T	89.3526	82.3786	86.704	151.105	149.311	157.267	48.9664	47.3015	39.4243	91.0806	84.3361	68.9823
sp|P27616|PUR7_YEAST	ADE1	Phosphoribosylaminoimidazole-succinocarboxamide synthase	0	U	K.FEFGIDEK.T	111.581	105.468	113.033	149.926	152.933	155.976	38.6617	62.0062	49.5941	99.9656	88.2261	74.9148
sp|P27616|PUR7_YEAST	ADE1	Phosphoribosylaminoimidazole-succinocarboxamide synthase	0	U	K.FEFGIDEK.T	49.9548	50.273	53.758	77.2499	91.9934	95.16	29.5535	27.0747	32.9756	54.3396	51.6679	55.9664
sp|P27616|PUR7_YEAST	ADE1	Phosphoribosylaminoimidazole-succinocarboxamide synthase	0	U	K.FEFGIDEK.T	103.176	99.6043	100.589	151.974	179.246	154.642	50.7501	45.1135	47.6986	105.002	100.52	94.1193
sp|P27616|PUR7_YEAST	ADE1	Phosphoribosylaminoimidazole-succinocarboxamide synthase	0	U	R.FWNGASYK.V	122.422	111.85	106.561	179.604	195.974	191.492	40.8871	40.8041	41.49	122.73	125.82	130.609
sp|P27616|PUR7_YEAST	ADE1	Phosphoribosylaminoimidazole-succinocarboxamide synthase	0	U	K.AEQGEHDENISPAQAAELVGEDLSR.R	20.7478	14.6688	18.1388	34.8269	33.9246	37.5512	7.06856	8.19868	6.16661	21.7575	25.7623	25.6093
sp|P27616|PUR7_YEAST	ADE1	Phosphoribosylaminoimidazole-succinocarboxamide synthase	0	U	R.GYITGSAWK.E	48.9767	49.7749	59.5826	102.559	85.2067	95.7756	34.4457	30.5576	32.172	66.3526	67.4713	62.0828
sp|P27616|PUR7_YEAST	ADE1	Phosphoribosylaminoimidazole-succinocarboxamide synthase	0	U	K.LNGVNGVK.M	62.2409	53.7665	61.6059	91.3092	91.5922	99.1403	32.7458	43.7954	35.3654	47.3311	63.5294	63.2534
sp|P27616|PUR7_YEAST	ADE1	Phosphoribosylaminoimidazole-succinocarboxamide synthase	0	U	K.AEQGEHDENISPAQAAELVGEDLSR.R	12.1579	14.4	16.0192	24.6163	23.3832	26.6856	4.61832	6.75386	5.35645	18.3294	20.6151	18.7791
sp|P27616|PUR7_YEAST	ADE1	Phosphoribosylaminoimidazole-succinocarboxamide synthase	0	U	K.AEQGEHDENISPAQAAELVGEDLSR.R	14.5053	18.3591	19.1757	31.0583	37.025	40.0137	8.87393	4.10414	8.40863	24.6094	21.0843	19.1053
sp|P27616|PUR7_YEAST	ADE1	Phosphoribosylaminoimidazole-succinocarboxamide synthase	0	U	R.GYITGSAWK.E	62.8999	64.4114	56.0607	108.067	110.097	104.22	30.6562	29.9224	24.0687	76.0683	66.6565	59.3753
sp|P27616|PUR7_YEAST	ADE1	Phosphoribosylaminoimidazole-succinocarboxamide synthase	0	U	K.AEQGEHDENISPAQAAELVGEDLSR.R	14.9194	11.8602	11.6672	26.2776	26.3182	20.1856	5.5654	8.57951	7.69773	13.0826	15.7585	16.0411
sp|P27616|PUR7_YEAST	ADE1	Phosphoribosylaminoimidazole-succinocarboxamide synthase	0	U	K.FEFGIDEK.T	125.208	133.19	149.012	217.612	240.031	222.272	58.8459	57.5725	59.4956	133.997	147.107	111.849
sp|P27616|PUR7_YEAST	ADE1	Phosphoribosylaminoimidazole-succinocarboxamide synthase	0	U	R.FWNGASYK.V	49.9409	53.071	52.436	64.2258	64.5317	66.0688	23.6146	21.6187	36.5111	53.6672	53.3271	42.46
sp|P27616|PUR7_YEAST	ADE1	Phosphoribosylaminoimidazole-succinocarboxamide synthase	0	U	K.GIIIADTK.F	65.8739	57.939	61.5657	111.519	109.042	115.794	24.4065	23.3328	21.2497	63.0065	50.1452	58.346
sp|P27616|PUR7_YEAST	ADE1	Phosphoribosylaminoimidazole-succinocarboxamide synthase	0	U	K.HKLIPLEVIVR.G	107.37	128.251	127.966	209.471	180.657	188.355	34.1048	19.8811	27.7579	100.296	71.7315	52.7866
sp|P27616|PUR7_YEAST	ADE1	Phosphoribosylaminoimidazole-succinocarboxamide synthase	0	U	R.NHLVDIAPGK.T	30.3789	23.9014	33.5758	48.4628	47.6045	48.809	9.84159	10.7265	10.7596	25.9015	27.463	28.4513
sp|P27616|PUR7_YEAST	ADE1	Phosphoribosylaminoimidazole-succinocarboxamide synthase	0	U	R.DWLTANK.L	35.8193	24.4345	32.4615	54.0836	50.32	46.9519	14.0899	11.4526	9.10695	33.1311	29.6277	35.2334
sp|P27616|PUR7_YEAST	ADE1	Phosphoribosylaminoimidazole-succinocarboxamide synthase	0	U	K.AEQGEHDENISPAQAAELVGEDLSR.R	13.9313	10.9181	14.5121	28.7856	29.3307	26.0434	7.41663	3.45379	4.70425	20.8604	16.944	19.7172
sp|P27616|PUR7_YEAST	ADE1	Phosphoribosylaminoimidazole-succinocarboxamide synthase	0	U	K.AEQGEHDENISPAQAAELVGEDLSR.R	22.4472	24.0999	23.5712	46.8652	44.3484	45.9545	12.2242	10.4043	8.05808	35.4824	25.8919	25.8222
sp|P27616|PUR7_YEAST	ADE1	Phosphoribosylaminoimidazole-succinocarboxamide synthase	0	U	K.AEQGEHDENISPAQAAELVGEDLSR.R	132.143	151.695	156.423	287.151	273.146	283.852	51.0987	47.303	57.3237	193.892	183.817	170.766
sp|P27616|PUR7_YEAST	ADE1	Phosphoribosylaminoimidazole-succinocarboxamide synthase	0	U	K.AEQGEHDENISPAQAAELVGEDLSR.R	14.4653	15.5226	15.4518	30.5024	31.6864	34.745	8.03813	3.94036	6.00935	16.7448	18.6336	17.3402
sp|P27616|PUR7_YEAST	ADE1	Phosphoribosylaminoimidazole-succinocarboxamide synthase	0	U	K.FEFGIDEK.T	54.2502	59.1067	74.7919	95.2293	81.7281	93.8542	44.0241	37.7576	44.2125	72.4946	66.7297	60.574
sp|P27616|PUR7_YEAST	ADE1	Phosphoribosylaminoimidazole-succinocarboxamide synthase	0	U	R.FWNGASYK.V	35.7132	32.7269	36.1987	49.9888	52.2289	56.138	14.7806	16.3898	19.7446	34.6257	41.5091	35.3566
sp|P27616|PUR7_YEAST	ADE1	Phosphoribosylaminoimidazole-succinocarboxamide synthase	0	U	K.LIPLEVIVR.G	25.5869	18.1935	17.9962	40.9711	47.5433	34.3397	9.2883	7.2563	9.52276	21.2956	20.6631	22.951
sp|P27616|PUR7_YEAST	ADE1	Phosphoribosylaminoimidazole-succinocarboxamide synthase	0	U	K.MPQDIVDR.T	104.662	104.485	123.436	216.516	199.61	202.098	34.951	25.3911	42.7219	116.19	116.232	106.254
sp|P27616|PUR7_YEAST	ADE1	Phosphoribosylaminoimidazole-succinocarboxamide synthase	0	U	R.NHLVDIAPGK.T	237.389	244.637	239.915	417.255	442.241	456.186	91.1287	82.4716	59.4456	210.695	235.463	228.881
sp|P27616|PUR7_YEAST	ADE1	Phosphoribosylaminoimidazole-succinocarboxamide synthase	0	U	K.VGESQDSYDK.Q	38.9554	32.2098	32.8527	68.249	58.8291	55.3798	9.02814	10.9908	14.2826	31.4581	37.2058	29.8184
sp|P80210|PURA_YEAST	ADE12	Adenylosuccinate synthetase	0	U	K.NIGTTGK.G	391.682	389.486	391.686	301.009	292.177	313.047	83.6227	76.8484	86.6693	202.353	214.431	198.826
sp|P80210|PURA_YEAST	ADE12	Adenylosuccinate synthetase	0	U	K.YEDLPENAK.K	37.6686	39.3906	31.237	33.5645	37.0822	30.1088	18.0437	16.1094	16.0148	32.6542	27.5917	35.9278
sp|P80210|PURA_YEAST	ADE12	Adenylosuccinate synthetase	0	U	K.GIGPTYSTK.A	88.8383	83.9362	88.7274	66.5036	74.2703	75.5134	19.9948	25.3433	19.0751	55.1243	54.8739	40.0173
sp|P80210|PURA_YEAST	ADE12	Adenylosuccinate synthetase	0	U	R.VGEGPFPTEQLNENGEK.L	212.703	193.999	220.501	194.409	186.204	196.08	58.0803	42.959	51.2353	123.634	116.355	112.651
sp|P80210|PURA_YEAST	ADE12	Adenylosuccinate synthetase	0	U	R.YGDFEYDFEAK.L	31.0316	28.3047	22.9568	22.2195	17.364	23.8954	5.02361	8.69848	4.30236	14.5419	11.8797	18.575
sp|P80210|PURA_YEAST	ADE12	Adenylosuccinate synthetase	0	U	R.VGEGPFPTEQLNENGEK.L	74.009	84.1934	83.675	64.2794	70.0028	78.8289	14.6617	16.9939	20.0296	47.0876	41.2119	40.0065
sp|P80210|PURA_YEAST	ADE12	Adenylosuccinate synthetase	0	U	R.YGDFEYDFEAK.L	120.072	116.331	136.319	101.64	115.647	96.5291	49.0537	40.5704	38.1128	90.9762	86.6668	55.2115
sp|P80210|PURA_YEAST	ADE12	Adenylosuccinate synthetase	0	U	K.LDVLDTFK.E	327.039	347.712	335.292	279.625	300.293	288.56	140.253	133.151	132.282	244.483	252.406	266.454
sp|P80210|PURA_YEAST	ADE12	Adenylosuccinate synthetase	0	U	R.VHHLVNDQPGAWEEFVAR.Y	29.3261	28.3395	30.548	19.9655	22.3455	15.1494	5.29244	7.73866	8.87849	13.5957	16.283	18.9715
sp|P80210|PURA_YEAST	ADE12	Adenylosuccinate synthetase	0	U	R.VHHLVNDQPGAWEEFVAR.Y	38.2502	30.3285	37.5307	32.1549	34.2833	25.1598	10.6113	7.72217	8.42472	20.7941	22.2465	24.7385
sp|P80210|PURA_YEAST	ADE12	Adenylosuccinate synthetase	0	U	R.AHLVFDFHQVTDK.L	335.514	323.99	361.039	246.397	263.543	278.15	108.851	121.005	106.582	187.467	178.43	182.32
sp|P80210|PURA_YEAST	ADE12	Adenylosuccinate synthetase	0	U	K.PFVVDSVVFM*HNAIEAK.K	238.202	114.609	110.677	45.0101	110.3	58.6253	39.1657	32.6311	39.9124	47.8717	45.9348	55.3687
sp|P80210|PURA_YEAST	ADE12	Adenylosuccinate synthetase	0	U	K.LDLFPEDLNILGK.V	238.803	238.696	251.549	221.007	253.625	225.272	79.4111	99.266	76.8904	267.543	256.68	221.25
sp|P80210|PURA_YEAST	ADE12	Adenylosuccinate synthetase	0	U	R.TIDEIYGVVK.A	182.201	199.315	190.76	202.612	181.473	189.316	70.2209	61.6832	52.0448	176.377	148.901	151.974
sp|P80210|PURA_YEAST	ADE12	Adenylosuccinate synthetase	0	U	R.VHHLVNDQPGAWEEFVAR.Y	62.8001	58.0737	56.3187	46.6319	49.5449	47.496	22.5236	17.6539	23.4012	35.7896	35.9296	38.1696
sp|P80210|PURA_YEAST	ADE12	Adenylosuccinate synthetase	0	U	R.YGDFEYDFEAK.L	28.8569	26.3052	22.4909	20.5162	19.4146	19.9851	7.70657	7.73327	6.73079	14.0905	12.9307	15.9736
sp|P80210|PURA_YEAST	ADE12	Adenylosuccinate synthetase	0	U	R.AHLVFDFHQVTDK.L	118.095	170.778	139.357	100.441	102.501	103.845	56.5296	61.6915	46.7936	84.7683	82.9227	90.1396
sp|P80210|PURA_YEAST	ADE12	Adenylosuccinate synthetase	0	U	R.VHHLVNDQPGAWEEFVAR.Y	54.9622	57.8626	42.8744	35.5712	39.5709	32.2971	13.6372	11.6492	14.6197	21.5995	29.3843	23.6676
sp|P80210|PURA_YEAST	ADE12	Adenylosuccinate synthetase	0	U	R.ELELSGR.S	118.147	135.804	125.586	97.4724	90.2721	97.7829	27.2669	29.5188	27.8546	64.0229	65.7071	52.2282
sp|P80210|PURA_YEAST	ADE12	Adenylosuccinate synthetase	0	U	R.YGDFEYDFEAK.L	1069.08	1083.75	1015.27	800.283	861.192	857.383	253.921	272.718	286.511	621.5	590.169	550.7
sp|P80210|PURA_YEAST	ADE12	Adenylosuccinate synthetase	0	U	R.YGDFEYDFEAK.L	164.849	164.228	201.246	159.349	155.766	148.085	54.2743	47.2608	35.7684	111.599	121.895	104.527
sp|P80210|PURA_YEAST	ADE12	Adenylosuccinate synthetase	0	U	R.VHHLVNDQPGAWEEFVAR.Y	90.3317	87.3753	78.0063	69.4047	64.4202	58.1586	27.1781	30.8138	35.8345	50.9348	46.5132	43.4665
sp|P80210|PURA_YEAST	ADE12	Adenylosuccinate synthetase	0	U	K.YEDLPENAK.K	66.9744	58.6084	61.1264	65.12	59.455	49.4247	25.1376	25.582	27.9691	56.9853	60.1854	54.6528
sp|P80210|PURA_YEAST	ADE12	Adenylosuccinate synthetase	0	U	R.AHLVFDFHQVTDK.L	509.791	539.149	518.308	399.783	439.224	420.493	137.602	145.722	133.872	301.642	298.402	294.193
sp|P80210|PURA_YEAST	ADE12	Adenylosuccinate synthetase	0	U	K.LDVLDTFK.E	73.2273	86.1873	86.2441	66.3069	80.6517	68.3516	33.1138	42.4226	34.7086	59.5646	59.6139	65.8806
sp|P80210|PURA_YEAST	ADE12	Adenylosuccinate synthetase	0	U	R.AHLVFDFHQVTDK.L	176.282	174.513	190.597	150.7	150.826	159.888	86.6381	89.6663	95.1057	131.954	129.658	116.091
sp|P80210|PURA_YEAST	ADE12	Adenylosuccinate synthetase	0	U	K.ELETLEAK.G	62.5416	61.7676	73.3429	73.8716	70.7984	62.084	48.9579	44.0326	37.9914	58.0252	53.6646	48.9111
sp|P80210|PURA_YEAST	ADE12	Adenylosuccinate synthetase	0	U	K.GIGPTYSTK.A	166.767	173.57	167.494	126.339	126.919	142.163	32.6269	37.8277	39.9114	73.8665	87.0787	90.5851
sp|P80210|PURA_YEAST	ADE12	Adenylosuccinate synthetase	0	U	K.KLDLFPEDLNILGK.V	1503.91	1469.87	1327.07	1545.96	1423.02	1377.65	691.494	676.322	702.819	1322.88	1396.67	1455.15
sp|P80210|PURA_YEAST	ADE12	Adenylosuccinate synthetase	0	U	R.TIDEIYGVVK.A	323.475	333.343	357.127	350.644	386.563	358.04	148.82	154.032	164.077	300.501	305.629	279.898
sp|P80210|PURA_YEAST	ADE12	Adenylosuccinate synthetase	0	U	K.NIGTTGK.G	269.668	250.852	280.754	211.223	204.57	215.676	67.9919	65.2604	46.3038	138.721	155.426	148.282
sp|Q05911|PUR8_YEAST	ADE13	Adenylosuccinate lyase	0	U	K.HVEITDDEIAK.A	42.7398	43.9661	43.1534	60.4946	68.4781	68.4378	21.8171	22.202	18.5429	35.5826	39.748	35.3576
sp|Q05911|PUR8_YEAST	ADE13	Adenylosuccinate lyase	0	U	K.SQIGSSAM*AYK.R	205.396	193.006	209.12	421.055	395.028	393.198	100.558	100.233	110.93	293.462	259.079	261.829
sp|Q05911|PUR8_YEAST	ADE13	Adenylosuccinate lyase	0	U	K.ELGLTVVTDEAIEQM*R.K	19.4411	12.7601	16.5878	19.7662	21.686	21.2828	3.58558	11.0203	2.11227	12.3886	16.0678	11.8756
sp|Q05911|PUR8_YEAST	ADE13	Adenylosuccinate lyase	0	U	K.DVNNALQPFQK.Y	220.776	190.319	201.478	446.396	396.325	388.007	212.499	189.154	194.539	376.325	442.593	479.521
sp|Q05911|PUR8_YEAST	ADE13	Adenylosuccinate lyase	0	U	K.LVNVINR.L	74.1378	89.9547	100.636	139.437	151.249	154.674	43.3364	46.9515	38.4458	91.6762	92.9184	85.323
sp|Q05911|PUR8_YEAST	ADE13	Adenylosuccinate lyase	0	U	-.MPDYDNYTTPLSSR.Y	20.5833	22.1434	20.4261	17.9297	13.7754	19.1149	10.6569	11.9704	13.7052	4.54378	3.7197	6.40152
sp|Q05911|PUR8_YEAST	ADE13	Adenylosuccinate lyase	0	U	K.LWLNLAIAEK.E	92.4619	93.0387	105.116	161.582	163.245	137.031	47.9207	46.2452	38.2351	88.7915	110.374	103.698
sp|Q05911|PUR8_YEAST	ADE13	Adenylosuccinate lyase	0	U	R.VLSHQAAAVVK.E	238.8	239.082	216.431	414.715	465.061	421.46	242.81	250.768	215.186	492.905	467.682	468.738
sp|Q05911|PUR8_YEAST	ADE13	Adenylosuccinate lyase	0	U	R.VTELLGFDK.V	9.0555	9.10779	8.34152	12.7845	11.9454	10.6537	3.89545	8.82122	7.56809	10.318	10.9436	10.628
sp|Q05911|PUR8_YEAST	ADE13	Adenylosuccinate lyase	0	U	R.VTELLGFDK.V	517.074	532.894	526.921	880.666	897.156	908.496	276.851	276.679	286.824	701.612	702.739	702.291
sp|Q05911|PUR8_YEAST	ADE13	Adenylosuccinate lyase	0	U	K.EEGGENDLIER.V	50.2458	50.1679	52.5814	123.363	122.17	120.619	43.6591	58.9687	42.2626	121.969	113.273	112.197
sp|Q05911|PUR8_YEAST	ADE13	Adenylosuccinate lyase	0	U	K.YLNDEQVK.L	197.21	188.846	180.766	463.98	440.791	394.536	182.647	187.624	180.95	429.707	413.817	396.717
sp|Q05911|PUR8_YEAST	ADE13	Adenylosuccinate lyase	0	U	K.YLNDEQVK.L	56.016	55.2632	63.7581	159.845	139.532	149.107	57.2012	53.8915	55.8625	153.193	133.82	129.89
sp|Q05911|PUR8_YEAST	ADE13	Adenylosuccinate lyase	0	U	R.VTELLGFDK.V	23.9657	19.3963	19.6893	34.1567	35.3457	38.8973	11.3983	12.7553	16.2823	34.287	31.6605	25.9847
sp|Q05911|PUR8_YEAST	ADE13	Adenylosuccinate lyase	0	U	K.GTTGTQASFLALFHGNHDK.V	19.1034	17.5122	16.5832	31.1629	30.2212	24.8189	12.2618	13.1151	16.8237	21.8924	31.1684	26.2601
sp|Q05911|PUR8_YEAST	ADE13	Adenylosuccinate lyase	0	U	K.GTTGTQASFLALFHGNHDK.V	17.2142	13.1726	17.3214	32.5733	30.5575	24.2715	17.4548	13.8205	13.694	29.6548	25.4987	23.3869
sp|Q05911|PUR8_YEAST	ADE13	Adenylosuccinate lyase	0	U	R.VTELLGFDK.V	28.2171	35.2188	25.5757	45.9565	56.5493	47.0554	19.9329	16.744	24.6804	38.0578	44.6228	37.9175
sp|Q05911|PUR8_YEAST	ADE13	Adenylosuccinate lyase	0	U	K.EVEEPFEK.S	254.857	231.117	211.473	403.69	446.879	428.1	126.455	117.986	118.379	298.967	297.226	285.603
sp|Q05911|PUR8_YEAST	ADE13	Adenylosuccinate lyase	0	U	K.SQIGSSAM*AYK.R	601.541	432.174	447.749	358.276	537.016	372.826	152.78	152.278	124.89	314.043	309.456	295.011
sp|Q05911|PUR8_YEAST	ADE13	Adenylosuccinate lyase	0	U	K.SQIGSSAM*AYK.R	24.115	20.8595	19.8235	13.1805	23.129	20.1402	8.57261	11.3847	9.03416	17.3396	12.6427	14.754
sp|Q05911|PUR8_YEAST	ADE13	Adenylosuccinate lyase	0	U	R.TLDDSAIR.R	161.948	169.984	160.308	320.5	332.342	315.478	72.7082	81.9539	79.9036	201.019	187.791	218.584
sp|Q05911|PUR8_YEAST	ADE13	Adenylosuccinate lyase	0	U	R.TLDDSAIR.R	231.03	229.982	232.946	428.476	451.8	449.961	120.387	116.433	121.312	296.18	298.597	296.41
sp|Q05911|PUR8_YEAST	ADE13	Adenylosuccinate lyase	0	U	R.VTELLGFDK.V	46.177	38.6463	39.1867	65.8225	67.3853	60.8516	26.7083	26.1196	22.8617	47.8925	43.6515	37.9501
sp|Q05911|PUR8_YEAST	ADE13	Adenylosuccinate lyase	0	U	R.VTELLGFDK.V	49.0219	47.1084	54.1866	79.0063	73.1496	81.7495	24.0922	25.953	24.8524	60.803	61.5052	46.8606
sp|Q05911|PUR8_YEAST	ADE13	Adenylosuccinate lyase	0	U	K.VYPVTGQTYSR.K	13.6913	11.2406	11.2292	11.2046	9.50689	11.6693	7.08658	6.22609	5.78247	8.97518	9.15475	13.6683
sp|Q05911|PUR8_YEAST	ADE13	Adenylosuccinate lyase	0	U	K.LWLNLAIAEK.E	136.649	135.838	132.727	215.66	233.198	225.14	70.0561	65.4839	53.8472	130.385	151.17	151.661
sp|Q05911|PUR8_YEAST	ADE13	Adenylosuccinate lyase	0	U	R.VTELLGFDK.V	26.3396	24.57	24.1494	43.3306	55.2321	43.428	14.0246	15.5448	20.6023	33.9764	29.8372	28.0888
sp|Q05911|PUR8_YEAST	ADE13	Adenylosuccinate lyase	0	U	R.DAYDIIIPK.L	110.506	123.119	113.8	165.009	199.621	205.494	65.6878	50.9885	58.1687	131.768	145.344	134.326
sp|Q05911|PUR8_YEAST	ADE13	Adenylosuccinate lyase	0	U	K.EVEEPFEK.S	69.3394	63.3014	66.545	105.953	120.953	116.34	46.5124	38.2831	37.3708	84.2085	82.2769	75.8298
sp|Q05911|PUR8_YEAST	ADE13	Adenylosuccinate lyase	0	U	K.EEGGENDLIER.V	70.518	68.6283	70.4106	171.512	165.769	151.698	59.3008	71.7139	55.7505	151.534	157.207	152.081
sp|Q05911|PUR8_YEAST	ADE13	Adenylosuccinate lyase	0	U	R.VLSHQAAAVVK.E	12.479	11.3254	12.1047	18.2378	25.0687	23.9773	7.31955	13.6982	12.3835	27.794	25.7973	23.5338
sp|Q05911|PUR8_YEAST	ADE13	Adenylosuccinate lyase	0	U	R.VLSHQAAAVVK.E	205.762	217.832	206.959	357.222	353.709	345.683	185.148	199.186	183.048	369.393	391.314	360.324
sp|Q05911|PUR8_YEAST	ADE13	Adenylosuccinate lyase	0	U	R.HLGSLFSDAVQTASVQWFER.T	32.5603	29.6627	28.6134	86.0442	78.4318	67.5239	22.5092	18.7316	31.8851	47.2785	64.1728	73.0737
sp|Q05911|PUR8_YEAST	ADE13	Adenylosuccinate lyase	0	U	K.LVNVINR.L	42.5362	46.775	44.1219	83.0995	83.9557	90.112	20.0435	22.221	25.1731	57.8102	44.1694	49.0212
sp|Q05911|PUR8_YEAST	ADE13	Adenylosuccinate lyase	0	U	K.HVEITDDEIAK.A	74.3744	77.4583	69.631	138.681	146.94	146.884	38.6078	33.1052	30.4187	88.0751	86.0147	79.7312
sp|Q05911|PUR8_YEAST	ADE13	Adenylosuccinate lyase	0	U	K.HVEITDDEIAK.A	287.536	300.812	312.626	532.166	557.087	561.779	144.291	146.946	140.022	346.199	333.564	311.911
sp|Q05911|PUR8_YEAST	ADE13	Adenylosuccinate lyase	0	U	K.SQIGSSAMAYK.R	21.645	25.8787	25.8953	48.2563	53.0145	49.6056	19.6688	16.4341	12.5807	32.4139	36.1122	35.2206
sp|P54113|PUR91_YEAST	ADE16	Bifunctional purine biosynthesis protein ADE16	0	U	K.GLVENNVR.I	134.434	149.915	142.283	126.925	128.911	136.326	97.9422	88.1991	90.0301	93.6271	99.2132	101.995
sp|P54113|PUR91_YEAST	ADE16	Bifunctional purine biosynthesis protein ADE16	0	U	R.NLEGDEK.D	106.026	95.4758	109.629	99.7599	98.7624	110.525	91.5321	88.1574	102.201	110.538	103.923	103.25
sp|P54113|PUR91_YEAST	ADE16	Bifunctional purine biosynthesis protein ADE16	0	U	R.EAGFPVDDVSSITHAPEM*LGGR.V	13.3352	9.60202	14.9779	14.5378	12.1911	10.2427	11.1552	8.70909	10.6784	9.64884	18.5363	14.8082
sp|P54113|PUR91_YEAST	ADE16	Bifunctional purine biosynthesis protein ADE16	0	U	R.EAGFPVDDVSSITHAPEMLGGR.V	91.1831	102.778	106.934	130.687	108.935	110.636	96.5548	84.6688	109.507	112.477	112.561	136.237
sp|P54113|PUR91_YEAST	ADE16	Bifunctional purine biosynthesis protein ADE16	0	U	K.LNNVSLSSDAFFPFPDNVYR.A	81.3355	84.4468	79.6922	68.3899	76.2756	69.008	44.3521	53.5901	41.8521	48.6481	50.0133	45.4369
sp|P54113|PUR91_YEAST	ADE16	Bifunctional purine biosynthesis protein ADE16	0	U	R.VTILSDPNDYSIFLQDLSK.D	28.3265	33.5586	29.5132	24.9589	29.5129	22.9502	24.795	25.9028	26.5569	26.537	32.9007	24.3246
sp|P54113|PUR91_YEAST	ADE16	Bifunctional purine biosynthesis protein ADE16	0	U	K.DGEISQDLR.N	89.7773	84.9352	78.9166	87.4417	86.9216	80.5616	64.7244	72.223	71.8775	75.1402	91.2568	79.2273
sp|P54113|PUR91_YEAST	ADE16	Bifunctional purine biosynthesis protein ADE16	0	U	K.FITAPSGSVMDK.V	825.53	853.549	846.153	734.667	726.933	736.251	504.992	511.896	490.1	585.103	569.679	576.054
sp|P54113|PUR91_YEAST	ADE16	Bifunctional purine biosynthesis protein ADE16	0	U	R.EVFGVTLQQK.R	408.748	407.374	400.765	347.763	384.107	383.574	277.381	290.919	263.612	287.122	289.132	287.377
sp|P54113|PUR91_YEAST	ADE16	Bifunctional purine biosynthesis protein ADE16	0	U	K.FEEVPEPFTK.E	115.861	121.576	111.977	111.697	101.006	105.327	71.4942	63.3526	64.6686	75.6647	76.5686	74.3391
sp|P54113|PUR91_YEAST	ADE16	Bifunctional purine biosynthesis protein ADE16	0	U	K.FEEVPEPFTK.E	48.3834	48.8678	36.3364	35.4224	36.4268	36.2499	30.6636	28.6784	23.3156	28.5143	27.3204	21.751
sp|P54113|PUR91_YEAST	ADE16	Bifunctional purine biosynthesis protein ADE16	0	U	K.FEEVPEPFTK.E	139.514	119.53	122.035	110.062	104.508	109.174	80.2588	74.0641	88.3852	87.2273	76.0301	83.1279
sp|P54113|PUR91_YEAST	ADE16	Bifunctional purine biosynthesis protein ADE16	0	U	K.FEEVPEPFTK.E	237.084	224.478	237.951	204.972	214.795	197.17	136.447	127.607	146.753	151.018	151.816	159.331
sp|P54113|PUR91_YEAST	ADE16	Bifunctional purine biosynthesis protein ADE16	0	U	R.PAQAYITQQEELPFK.V	70.6187	51.4949	60.4001	82.5345	82.7587	85.5023	69.5599	60.5752	71.3806	78.7043	64.9368	83.3857
sp|P54113|PUR91_YEAST	ADE16	Bifunctional purine biosynthesis protein ADE16	0	U	R.AVQSGVK.F	317.17	326.968	319.569	299.537	305.768	284.23	173.222	174.829	184.742	203.983	202.524	179.802
sp|P54113|PUR91_YEAST	ADE16	Bifunctional purine biosynthesis protein ADE16	0	U	K.FEEVPEPFTK.E	62.3484	50.0345	64.1792	46.3439	44.6119	42.8415	34.7112	27.3611	30.6942	40.3387	40.4427	30.0675
sp|P54113|PUR91_YEAST	ADE16	Bifunctional purine biosynthesis protein ADE16	0	U	K.FITAPSGSVM*DK.V	25.8115	15.5084	22.0023	9.80122	7.80724	8.13426	8.10362	8.19489	6.68595	7.97902	9.37976	7.12291
sp|P54113|PUR91_YEAST	ADE16	Bifunctional purine biosynthesis protein ADE16	0	U	K.GLVENNVR.I	204.412	204.306	215.737	179.598	172.508	175.938	186.096	184.123	171.926	207.588	149.995	126.769
sp|P54113|PUR91_YEAST	ADE16	Bifunctional purine biosynthesis protein ADE16	0	U	K.SNAIDLFVTGQR.I	53.116	50.2268	47.1718	38.2796	43.0041	43.4361	22.8519	28.7164	25.6863	28.1049	33.7564	35.5317
sp|P54113|PUR91_YEAST	ADE16	Bifunctional purine biosynthesis protein ADE16	0	U	R.EVFGVTLQQK.R	13.9265	14.066	12.9657	14.6142	15.2465	12.2866	7.57335	8.59586	6.54105	7.73067	9.38571	7.23159
sp|P54113|PUR91_YEAST	ADE16	Bifunctional purine biosynthesis protein ADE16	0	U	K.FITAPSGSVM*DK.V	18.3724	21.2001	21.4268	14.4775	14.1811	13.4428	10.4845	9.66484	11.2088	7.81657	8.28806	10.6066
sp|P54113|PUR91_YEAST	ADE16	Bifunctional purine biosynthesis protein ADE16	0	U	K.FITAPSGSVMDK.V	813.93	864.516	810.601	704.161	717.732	731.802	516.047	524.197	477.507	572.684	518.17	541.748
sp|P54113|PUR91_YEAST	ADE16	Bifunctional purine biosynthesis protein ADE16	0	U	K.FEEVPEPFTK.E	47.8347	40.8121	43.8445	39.9678	39.8885	41.0645	27.3012	29.3389	28.8203	28.3977	30.485	35.3186
sp|P54113|PUR91_YEAST	ADE16	Bifunctional purine biosynthesis protein ADE16	0	U	K.TLHPAVHAGILAR.N	146.548	140.391	141.224	149.09	141.581	133.635	173.714	157.003	180.689	167.436	165.343	177.797
sp|P54113|PUR91_YEAST	ADE16	Bifunctional purine biosynthesis protein ADE16	0	U	R.AVQSGVK.F	370.022	369.213	369.234	331.749	324.125	348.163	234.108	200.952	206.073	240.514	264.987	258.163
sp|P54113|PUR91_YEAST	ADE16	Bifunctional purine biosynthesis protein ADE16	0	U	R.NLEGDEK.D	158.97	141.912	152.996	173.238	168.342	157.714	140.131	130.163	136.901	167.771	154.218	162.127
sp|P38009|PUR92_YEAST	ADE17	Bifunctional purine biosynthesis protein ADE17	0	U	R.QVYGVTLEQK.R	21.959	22.7157	21.122	68.6251	78.2363	69.6347	0	1.27974	4.32521	36.3098	30.8285	29.6606
sp|P38009|PUR92_YEAST	ADE17	Bifunctional purine biosynthesis protein ADE17	0	U	R.QVYGVTLEQK.R	20.6186	21.8771	22.9904	59.4369	60.4648	69.027	4.78647	3.43052	0	22.8064	27.8665	39.7907
sp|P38009|PUR92_YEAST	ADE17	Bifunctional purine biosynthesis protein ADE17	0	U	R.QVYGVTLEQK.R	12.6573	18.0022	14.5364	64.4374	71.7676	66.4867	5.31201	5.9528	1.7542	56.4034	47.738	49.7184
sp|P38009|PUR92_YEAST	ADE17	Bifunctional purine biosynthesis protein ADE17	0	U	R.QVYGVTLEQK.R	10.3034	9.67021	13.1397	29.2723	29.6524	25.4142	1.7891	0.955665	0	15.6437	15.0264	17.4796
sp|P38009|PUR92_YEAST	ADE17	Bifunctional purine biosynthesis protein ADE17	0	U	K.YIAAPSGSVMDK.V	233.34	215.848	240.996	616.545	593.247	591.308	24.2625	22.5911	25.3657	256.967	254.262	222.345
sp|P38009|PUR92_YEAST	ADE17	Bifunctional purine biosynthesis protein ADE17	0	U	R.DAGFPIEDVSAITHAPEMLGGR.V	37.3106	35.6637	43.9713	135.473	101.72	114.702	10.3515	5.1561	2.6479	69.0725	56.5528	66.8473
sp|P38009|PUR92_YEAST	ADE17	Bifunctional purine biosynthesis protein ADE17	0	U	R.VTILSDPK.D	155.538	150.297	168.377	485.642	483.312	475.112	14.4788	12.8042	12.7902	330.449	350.651	340.252
sp|P38009|PUR92_YEAST	ADE17	Bifunctional purine biosynthesis protein ADE17	0	U	K.LTNVSLSSDAFFPFPDNVYR.A	227.051	216.37	231.568	647.732	637.336	629.233	9.591	5.42954	11.0158	284.98	309.213	289.824
sp|P38009|PUR92_YEAST	ADE17	Bifunctional purine biosynthesis protein ADE17	0	U	R.EVSDGVIAPGYEPEALAILSK.K	281.856	275.1	266.15	791.251	755.926	849.596	48.6337	34.784	10.4444	483.446	483.805	468.269
sp|P38009|PUR92_YEAST	ADE17	Bifunctional purine biosynthesis protein ADE17	0	U	R.EVSDGVIAPGYEPEALAILSK.K	35.6817	41.7269	40.4336	107.941	110.936	93.0623	7.87528	2.46867	8.51172	66.6163	70.8711	69.6375
sp|P38009|PUR92_YEAST	ADE17	Bifunctional purine biosynthesis protein ADE17	0	U	K.EIVSQNK.N	36.9958	37.9154	43.7271	90.1188	112.675	95.6566	6.5539	6.27704	8.59761	57.5346	56.7888	53.2393
sp|P38009|PUR92_YEAST	ADE17	Bifunctional purine biosynthesis protein ADE17	0	U	K.SNAIDLFVTGQIPTEEPELSEYQSK.F	12.5112	11.343	7.91437	21.7892	18.1384	24.0924	4.89119	1.16014	3.20723	11.6787	13.3999	7.47677
sp|P38009|PUR92_YEAST	ADE17	Bifunctional purine biosynthesis protein ADE17	0	U	R.ILASGGTAR.M	100.226	92.9991	102.54	236.65	244.699	238.463	11.6675	11.3788	4.37463	177.679	186.453	175.037
sp|P38009|PUR92_YEAST	ADE17	Bifunctional purine biosynthesis protein ADE17	0	U	R.EVSDGVIAPGYEPEALAILSK.K	55.4534	64.3366	63.948	147.029	132.155	132.223	17.6119	15.5309	12.5967	91.9013	81.4013	67.1499
sp|P38009|PUR92_YEAST	ADE17	Bifunctional purine biosynthesis protein ADE17	0	U	R.EVSDGVIAPGYEPEALAILSK.K	102.684	98.9538	102.493	253.43	288.718	267.894	24.3417	12.3449	15.243	165.844	181.966	150.682
sp|P38009|PUR92_YEAST	ADE17	Bifunctional purine biosynthesis protein ADE17	0	U	K.YIAAPSGSVMDK.V	143.849	129.419	147.086	357.762	321.43	328.341	47.5359	50.6481	62.1109	164.254	171.849	151.171
sp|P38009|PUR92_YEAST	ADE17	Bifunctional purine biosynthesis protein ADE17	0	U	K.ADNWWFR.Q	132.591	135.032	124.869	348.142	356.013	366.897	53.2073	57.3397	60.0309	187.303	197.504	159.756
sp|P38009|PUR92_YEAST	ADE17	Bifunctional purine biosynthesis protein ADE17	0	U	K.TLHPAVHGGILAR.D	76.9324	90.4783	94.8557	230.552	199.853	220.374	13.6402	6.94444	9.07726	107.448	120.345	104.214
sp|P38009|PUR92_YEAST	ADE17	Bifunctional purine biosynthesis protein ADE17	0	U	R.DAGFPIEDVSAITHAPEM*LGGR.V	10.9021	5.56099	6.82179	26.0306	21.7388	21.0361	2.12077	0.384982	0	15.7924	10.9427	12.7887
sp|P38009|PUR92_YEAST	ADE17	Bifunctional purine biosynthesis protein ADE17	0	U	R.DAGFPIEDVSAITHAPEM*LGGR.V	4.99114	5.37546	9.70158	16.5413	19.1531	21.7953	3.20464	1.23981	1.93095	6.11299	11.9363	9.54954
sp|P38009|PUR92_YEAST	ADE17	Bifunctional purine biosynthesis protein ADE17	0	U	R.DAGFPIEDVSAITHAPEM*LGGR.V	7.32751	11.725	13.1122	27.1467	22.6447	24.1363	2.46393	1.75394	0	10.3689	14.439	11.874
sp|P38009|PUR92_YEAST	ADE17	Bifunctional purine biosynthesis protein ADE17	0	U	K.SNAIDLFVTGQIPTEEPELSEYQSK.F	163.792	156.962	180.556	372.452	373.187	397.542	84.0962	63.6116	80.5575	238.691	219.842	216.315
sp|P38009|PUR92_YEAST	ADE17	Bifunctional purine biosynthesis protein ADE17	0	U	K.YIAAPSGSVMDK.V	11.4473	9.25134	9.64627	26.8417	30.6203	27.8712	3.48668	1.94982	0	9.36752	9.86043	16.016
sp|P38009|PUR92_YEAST	ADE17	Bifunctional purine biosynthesis protein ADE17	0	U	K.YIAAPSGSVMDK.V	32.15	32.8572	36.1722	99.6733	85.7779	92.6538	2.66533	0.746847	3.579	42.4442	41.2991	42.7089
sp|P38009|PUR92_YEAST	ADE17	Bifunctional purine biosynthesis protein ADE17	0	U	K.YIAAPSGSVM*DK.V	17.3919	12.2221	15.7614	17.5741	32.7322	17.0442	1.0141	0	0	9.32407	6.54725	7.62024
sp|P38009|PUR92_YEAST	ADE17	Bifunctional purine biosynthesis protein ADE17	0	U	K.QYSEGQAQITLR.Y	68.0346	54.9198	66.1647	209.099	188.747	204.602	10.4082	0.750912	8.39475	117.274	134.359	127.571
sp|P38009|PUR92_YEAST	ADE17	Bifunctional purine biosynthesis protein ADE17	0	U	K.TLHPAVHGGILAR.D	235.213	230.909	252.103	706.948	697.271	665.138	18.7679	22.9611	19.5607	403.091	411.527	418.423
sp|P21264|PUR6_YEAST	ADE2	Phosphoribosylaminoimidazole carboxylase	0	U	R.DLGFPFVLK.S	5.17233	9.3144	9.19914	282.107	265.142	261.613	0	0	0	175.183	165.44	157.648
sp|P21264|PUR6_YEAST	ADE2	Phosphoribosylaminoimidazole carboxylase	0	U	R.LNYITGR.T	3.60349	1.55324	2.84111	86.7406	94.6351	72.606	0	0.943319	0	49.0461	51.2362	44.4738
sp|P21264|PUR6_YEAST	ADE2	Phosphoribosylaminoimidazole carboxylase	0	U	R.TVGILGGGQLGR.M	3.72628	3.53387	3.54761	22.815	25.3501	19.6693	2.85074	1.18305	0.176561	27.3346	23.6234	22.0687
sp|P21264|PUR6_YEAST	ADE2	Phosphoribosylaminoimidazole carboxylase	0	U	R.MSAYAISASK.R	15.1133	13.5007	17.7169	373.323	288.504	324.267	0.256796	1.75125	3.36413	214.923	246.762	315.007
sp|P21264|PUR6_YEAST	ADE2	Phosphoribosylaminoimidazole carboxylase	0	U	K.NGIAVTQSVPVEQASETSLLNVGR.D	8.44043	11.9527	12.5505	131.17	117.857	111.122	0	0	0	86.7132	89.1579	92.5154
sp|P21264|PUR6_YEAST	ADE2	Phosphoribosylaminoimidazole carboxylase	0	U	K.LETVGYEAYLENK.-	7.54089	5.68199	11.9843	99.2878	101.029	100.693	6.35897	12.0983	7.82349	120.972	129.198	123.634
sp|P21264|PUR6_YEAST	ADE2	Phosphoribosylaminoimidazole carboxylase	0	U	K.LETVGYEAYLENK.-	4.35811	4.12486	3.74646	43.1225	50.7641	65.7634	3.60033	1.40145	0	67.364	79.4533	74.0867
sp|P21264|PUR6_YEAST	ADE2	Phosphoribosylaminoimidazole carboxylase	0	U	R.SILDLPMPK.N	8.34051	12.335	16.1732	292.794	291.341	262.943	13.5015	8.15777	10.8964	176.335	181.495	173.338
sp|P21264|PUR6_YEAST	ADE2	Phosphoribosylaminoimidazole carboxylase	0	U	K.EMIPEALEVLK.D	54.176	45.3915	46.6103	366.337	370.423	362.42	12.5693	13.123	17.0541	222.341	205.991	201.562
sp|P21264|PUR6_YEAST	ADE2	Phosphoribosylaminoimidazole carboxylase	0	U	K.EMIPEALEVLK.D	9.79712	10.6088	20.1399	595.622	566.456	586.772	0	0	0	372.818	349.026	347.715
sp|P21264|PUR6_YEAST	ADE2	Phosphoribosylaminoimidazole carboxylase	0	U	K.TVILDAENSPAK.Q	13.6661	12.7705	19.4733	411.773	428.282	410.174	6.35785	3.37257	0	376.185	367.216	330.067
sp|P21264|PUR6_YEAST	ADE2	Phosphoribosylaminoimidazole carboxylase	0	U	K.TVILDAENSPAK.Q	9.43189	15.8155	14.9821	127.901	97.6775	114.27	11.6622	6.79429	5.49966	104.838	93.7846	98.037
sp|P21264|PUR6_YEAST	ADE2	Phosphoribosylaminoimidazole carboxylase	0	U	K.LLAENAIK.S	0	2.80764	9.89842	352.663	359.218	368.926	3.21261	0	0	233.245	231.16	235.467
sp|P21264|PUR6_YEAST	ADE2	Phosphoribosylaminoimidazole carboxylase	0	U	R.ALATPGSSVYLYGK.E	0	0	2.02894	48.0555	46.6164	53.2032	4.23891	0.775044	0.436477	29.0539	31.284	29.4726
sp|P21264|PUR6_YEAST	ADE2	Phosphoribosylaminoimidazole carboxylase	0	U	K.QISNSNDHVNGSFSNPLDIEK.L	0	1.70774	5.46761	154.342	94.7802	107.086	5.13944	0	0.19213	81.2625	99.8584	112.918
sp|P21264|PUR6_YEAST	ADE2	Phosphoribosylaminoimidazole carboxylase	0	U	K.EMIPEALEVLK.D	11.2366	9.49602	12.7596	190.629	185.684	182.04	6.74215	3.81626	5.23619	123.931	119.644	119.557
sp|P21264|PUR6_YEAST	ADE2	Phosphoribosylaminoimidazole carboxylase	0	U	R.SVNGLVFSYPIVETIHK.D	0	2.58182	2.88512	25.7776	28.2684	27.8251	2.59283	2.71358	1.22936	18.28	18.0452	20.3635
sp|P21264|PUR6_YEAST	ADE2	Phosphoribosylaminoimidazole carboxylase	0	U	R.SVNGLVFSYPIVETIHK.D	0.00500725	0	0	39.1779	35.695	34.8565	1.52611	0.375215	0	28.1229	20.2409	28.6302
sp|P21264|PUR6_YEAST	ADE2	Phosphoribosylaminoimidazole carboxylase	0	U	K.DFGVPFEVTIVSAHR.T	0.00713338	0	0	64.4103	52.9005	46.0449	0	0	0	37.9354	38.7775	44.7811
sp|P21264|PUR6_YEAST	ADE2	Phosphoribosylaminoimidazole carboxylase	0	U	R.SVNGLVFSYPIVETIHK.D	33.2277	36.6431	34.051	176.598	178.375	167.119	25.4164	20.7709	17.3969	87.4852	109.878	101.491
sp|P21264|PUR6_YEAST	ADE2	Phosphoribosylaminoimidazole carboxylase	0	U	R.SVNGLVFSYPIVETIHK.D	0	1.68687	3.82774	429.39	424.704	453.141	0	0	0	221.436	272.023	299.985
sp|P21264|PUR6_YEAST	ADE2	Phosphoribosylaminoimidazole carboxylase	0	U	R.VPDSVQLK.A	16.5253	16.1324	17.5967	235.959	237.323	244.736	25.9496	26.6674	13.7024	172.834	173.145	161.797
sp|P07245|C1TC_YEAST	ADE3	C-1-tetrahydrofolate synthase, cytoplasmic	0	U	R.DGTSSDK.K	168.862	180.534	200.419	185.049	191.984	177.117	113.679	107.748	117.306	160.73	155.459	141.828
sp|P07245|C1TC_YEAST	ADE3	C-1-tetrahydrofolate synthase, cytoplasmic	0	U	K.LLTPVPSDIDISR.A	39.2646	50.8957	50.7063	35.2543	35.7539	36.3616	28.1386	27.6965	22.1696	35.0267	36.5316	32.1485
sp|P07245|C1TC_YEAST	ADE3	C-1-tetrahydrofolate synthase, cytoplasmic	0	U	R.QITIGQAPTEK.N	78.9169	77.8753	74.8965	70.8328	72.7476	99.4168	66.8559	56.5885	54.2554	72.9955	66.4299	68.4673
sp|P07245|C1TC_YEAST	ADE3	C-1-tetrahydrofolate synthase, cytoplasmic	0	U	K.SLNSTVTITHSK.T	160.014	158.218	165.858	193.82	171.917	164.001	137.061	145.365	162.897	153.491	179.201	188.835
sp|P07245|C1TC_YEAST	ADE3	C-1-tetrahydrofolate synthase, cytoplasmic	0	U	R.SSGLTPNAVVLVATVR.A	11.2953	5.59122	5.60747	13.2682	5.99572	7.47844	10.5093	10.2112	9.86009	7.5632	7.07747	19.2229
sp|P07245|C1TC_YEAST	ADE3	C-1-tetrahydrofolate synthase, cytoplasmic	0	U	R.VVVAADVNR.S	74.0174	69.5955	61.715	62.6241	72.0107	61.3515	55.3158	57.3489	55.6263	66.4766	65.3037	67.1992
sp|P07245|C1TC_YEAST	ADE3	C-1-tetrahydrofolate synthase, cytoplasmic	0	U	R.VVVAADVNR.S	8.89931	13.1054	10.5603	13.5455	13.7146	12.6302	8.38689	8.81732	13.2702	12.8157	10.2845	12.4584
sp|P07245|C1TC_YEAST	ADE3	C-1-tetrahydrofolate synthase, cytoplasmic	0	U	K.DVDGFGPTNIGELNK.K	145.466	151.206	150.854	168.358	170.367	160.587	130.574	147.115	123.866	152.87	165.205	178.465
sp|P07245|C1TC_YEAST	ADE3	C-1-tetrahydrofolate synthase, cytoplasmic	0	U	K.DVDGFGPTNIGELNK.K	72.2928	83.5301	71.5649	73.6568	87.8998	97.9663	76.104	60.8908	66.9758	88.3026	82.1955	82.9999
sp|P07245|C1TC_YEAST	ADE3	C-1-tetrahydrofolate synthase, cytoplasmic	0	U	K.MYGGAAIDILPEAQR.K	56.1001	52.2208	49.5314	58.2508	45.7421	44.9814	52.0089	46.2006	49.2954	60.6054	58.4435	55.1812
sp|P07245|C1TC_YEAST	ADE3	C-1-tetrahydrofolate synthase, cytoplasmic	0	U	K.LVGTEPEAK.T	105.004	113.712	103.577	96.6075	103.46	97.6233	92.1437	90.7053	80.4747	113.939	116.166	114.293
sp|P07245|C1TC_YEAST	ADE3	C-1-tetrahydrofolate synthase, cytoplasmic	0	U	R.SNIANEIK.S	77.0717	81.8707	75.2275	61.6929	60.3479	65.7568	48.9226	49.6735	64.5937	57.9832	62.474	65.9762
sp|P07245|C1TC_YEAST	ADE3	C-1-tetrahydrofolate synthase, cytoplasmic	0	U	K.FETDTEGEIAAIR.K	37.8331	41.0177	35.9015	40.4321	31.5849	41.8399	45.4142	40.9274	36.8231	53.8902	47.1187	49.9804
sp|P07245|C1TC_YEAST	ADE3	C-1-tetrahydrofolate synthase, cytoplasmic	0	U	K.LVGTEPEAK.T	11.2082	12.9542	12.6698	12.7542	13.0212	16.2336	11.7196	8.34782	9.82691	13.9442	17.79	14.1599
sp|P07245|C1TC_YEAST	ADE3	C-1-tetrahydrofolate synthase, cytoplasmic	0	U	K.NDATFYNR.L	399.748	341.651	332.467	361.67	295.219	299.544	210.893	197.02	211.83	293.518	294.439	333.993
sp|P07245|C1TC_YEAST	ADE3	C-1-tetrahydrofolate synthase, cytoplasmic	0	U	K.YILVSGITPTPLGEGK.S	43.1454	47.4765	51.3947	43.0174	56.9702	52.8153	44.0119	51.2974	41.2799	48.2061	47.7766	42.3094
sp|P07245|C1TC_YEAST	ADE3	C-1-tetrahydrofolate synthase, cytoplasmic	0	U	K.DVDGFGPTNIGELNK.K	355.093	362.886	378.184	381.52	387.451	350.941	339.495	307.499	323.657	423.278	417.64	372.043
sp|P07245|C1TC_YEAST	ADE3	C-1-tetrahydrofolate synthase, cytoplasmic	0	U	K.MYGGAAIDILPEAQR.K	12.4502	19.9688	13.9497	13.7641	13.8163	16.3085	15.3668	15.9172	10.5142	12.599	19.6053	12.5377
sp|P07245|C1TC_YEAST	ADE3	C-1-tetrahydrofolate synthase, cytoplasmic	0	U	R.SNIANEIK.S	763.736	812.71	738.561	696.468	643.637	713.267	478.874	505.364	439.21	675.532	591.74	598.076
sp|P07245|C1TC_YEAST	ADE3	C-1-tetrahydrofolate synthase, cytoplasmic	0	U	K.FETDTEGEIAAIR.K	12.6168	15.2099	12.2935	11.3379	11.5018	11.1163	13.03	13.8248	11.668	14.7448	21.2285	18.0148
sp|P07245|C1TC_YEAST	ADE3	C-1-tetrahydrofolate synthase, cytoplasmic	0	U	K.LTTIVQK.M	122.953	120.463	122.558	118.664	110.579	111.831	107.711	101.945	110.999	119.25	130.016	129.351
sp|P07245|C1TC_YEAST	ADE3	C-1-tetrahydrofolate synthase, cytoplasmic	0	U	K.TNPDDLTPEEINK.F	22.8163	19.1705	25.3217	21.5062	22.4257	22.7752	22.6894	18.5943	19.5176	19.8776	17.6598	23.4041
sp|P07245|C1TC_YEAST	ADE3	C-1-tetrahydrofolate synthase, cytoplasmic	0	U	K.PGQPLPSAYTEENIEFVEK.G	17.2551	17.5632	17.3331	17.2357	15.7436	13.0705	7.7748	8.65087	8.36918	5.9354	5.85936	5.09109
sp|P07245|C1TC_YEAST	ADE3	C-1-tetrahydrofolate synthase, cytoplasmic	0	U	R.MFHETTQK.N	402.834	393.834	399.596	490.938	377.247	401.63	284.119	258.123	369.477	363.497	388.754	485.795
sp|P07245|C1TC_YEAST	ADE3	C-1-tetrahydrofolate synthase, cytoplasmic	0	U	K.GVPTGFTFPIR.D	35.4452	26.1211	27.8302	30.1318	25.7837	25.9792	28.6302	17.3534	18.3973	31.6243	23.8433	40.939
sp|P07245|C1TC_YEAST	ADE3	C-1-tetrahydrofolate synthase, cytoplasmic	0	U	K.STTTM*GLVQALTAHLGK.P	40.0199	45.9736	42.8129	61.7945	55.3331	52.9327	101.223	84.9228	99.0202	96.1996	114.166	113.407
sp|P07245|C1TC_YEAST	ADE3	C-1-tetrahydrofolate synthase, cytoplasmic	0	U	K.FETDTEGEIAAIR.K	19.6281	12.17	10.5819	16.9357	18.2839	14.687	17.3586	12.0274	12.4932	18.7549	19.2348	18.0168
sp|P07245|C1TC_YEAST	ADE3	C-1-tetrahydrofolate synthase, cytoplasmic	0	U	K.LVGTEPEAK.T	13.2934	16.3119	12.4907	14.3239	20.0602	15.4635	13.9463	16.076	13.5895	15.342	17.6352	19.8913
sp|P07245|C1TC_YEAST	ADE3	C-1-tetrahydrofolate synthase, cytoplasmic	0	U	K.TQYSLSHDATLK.G	104.843	77.9434	92.7261	141.019	104.172	109.392	80.0648	76.3166	117.413	112.681	124.876	157.4
sp|P07245|C1TC_YEAST	ADE3	C-1-tetrahydrofolate synthase, cytoplasmic	0	U	R.QMEESSK.P	12.2109	16.4143	12.9061	16.0555	16.7499	13.0693	14.4641	14.1881	15.6986	16.5896	16.198	17.4973
sp|P07245|C1TC_YEAST	ADE3	C-1-tetrahydrofolate synthase, cytoplasmic	0	U	K.SLNSTVTITHSK.T	131.82	108.308	95.175	122.286	117.795	119.986	83.3493	89.3525	104.137	105.886	110.977	122.762
sp|P07245|C1TC_YEAST	ADE3	C-1-tetrahydrofolate synthase, cytoplasmic	0	U	K.TVVIDVGTNYVADPSK.K	29.8326	26.0475	29.0693	20.6683	23.4435	22.3293	14.1936	16.2288	12.6963	26.3765	28.4095	18.0291
sp|P07245|C1TC_YEAST	ADE3	C-1-tetrahydrofolate synthase, cytoplasmic	0	U	R.DGTSSDK.K	147.701	141.707	148.877	141.252	145.541	162.818	93.0343	90.7207	81.3297	138.962	123.261	123.487
sp|P07245|C1TC_YEAST	ADE3	C-1-tetrahydrofolate synthase, cytoplasmic	0	U	R.QITIGQAPTEK.N	240.175	251.978	245.689	258.735	255.206	267.275	198.009	214.624	190.944	255.706	234.969	233.663
sp|P07245|C1TC_YEAST	ADE3	C-1-tetrahydrofolate synthase, cytoplasmic	0	U	R.QITIGQAPTEK.N	596.156	785.39	589.246	597.101	565.528	604.362	843.654	958.871	701.995	952.076	887.332	874.443
sp|P07245|C1TC_YEAST	ADE3	C-1-tetrahydrofolate synthase, cytoplasmic	0	U	K.SHGGAPDVKPGQPLPSAYTEENIEFVEK.G	76.4352	69.307	73.2668	120.211	111.006	102.622	85.9333	79.2839	96.2013	90.8245	95.2022	108.988
sp|P07245|C1TC_YEAST	ADE3	C-1-tetrahydrofolate synthase, cytoplasmic	0	U	K.SHGGAPDVKPGQPLPSAYTEENIEFVEK.G	70.9587	63.9079	69.1679	97.3388	85.3333	86.641	71.8011	72.9192	78.4227	81.5299	84.2194	83.0624
sp|P04046|PUR1_YEAST	ADE4	Amidophosphoribosyltransferase	0	U	R.YNHIYGIDLTDTK.N	220.194	221.111	204.267	229.949	254.925	225.143	233.525	230.726	247.622	288.175	292.293	319.171
sp|P04046|PUR1_YEAST	ADE4	Amidophosphoribosyltransferase	0	U	K.EIVNMAK.E	101.138	95.1144	105.226	81.2155	90.1858	88.6818	101.383	89.9913	92.8898	94.3898	103.878	105.812
sp|P04046|PUR1_YEAST	ADE4	Amidophosphoribosyltransferase	0	U	K.PGEAVIIPK.N	91.713	76.1271	101.896	58.9585	69.0013	65.7204	68.2271	74.9664	48.3283	89.2486	68.438	58.0706
sp|P04046|PUR1_YEAST	ADE4	Amidophosphoribosyltransferase	0	U	R.TFIMPNQR.E	53.9278	56.5341	67.9586	55.2454	46.436	63.8156	50.7594	32.4003	41.2892	40.3	55.2564	58.2227
sp|P04046|PUR1_YEAST	ADE4	Amidophosphoribosyltransferase	0	U	R.ESIANNSSDMK.A	15.5745	25.5852	19.8605	17.4964	21.9116	24.834	23.7097	22.542	22.0943	26.1902	24.7458	32.8706
sp|P04046|PUR1_YEAST	ADE4	Amidophosphoribosyltransferase	0	U	K.RESIANNSSDMK.A	69.9798	92.6624	75.4445	62.3334	82.0585	77.9458	90.9274	93.5591	83.9824	83.3429	101.546	82.2329
sp|P04046|PUR1_YEAST	ADE4	Amidophosphoribosyltransferase	0	U	R.VSGLAGSMGIAHLR.Y	49.9898	53.4403	43.7654	61.57	61.5742	56.2335	73.5323	65.0002	95.1928	92.1933	77.1357	100.203
sp|P04046|PUR1_YEAST	ADE4	Amidophosphoribosyltransferase	0	U	K.VYFASAAPAIR.Y	14.4637	12.7731	13.6497	14.4815	14.1065	17.6163	19.3877	20.5406	16.8868	27.8025	26.2455	22.1963
sp|P04046|PUR1_YEAST	ADE4	Amidophosphoribosyltransferase	0	U	R.VNNEDVFHALEGVYR.L	59.066	59.9842	55.691	58.3826	50.4372	44.7806	50.057	51.1514	47.3733	51.8014	62.2807	59.6287
sp|P04046|PUR1_YEAST	ADE4	Amidophosphoribosyltransferase	0	U	R.VNNEDVFHALEGVYR.L	116.72	110.843	115.875	91.516	96.1443	90.1573	98.2797	120.437	92.3615	113.648	106.272	111.519
sp|P04046|PUR1_YEAST	ADE4	Amidophosphoribosyltransferase	0	U	R.VNNEDVFHALEGVYR.L	72.0987	73.5839	63.9776	61.7928	68.7473	71.1286	66.3714	78.7288	69.5979	82.4574	78.571	85.0669
sp|P04046|PUR1_YEAST	ADE4	Amidophosphoribosyltransferase	0	U	K.VLIVDDSIVR.G	92.3863	84.2826	111.986	76.4749	80.8234	82.2333	67.0979	60.1882	64.1259	80.2438	81.2273	79.8451
sp|P04046|PUR1_YEAST	ADE4	Amidophosphoribosyltransferase	0	U	K.LNPMESEFK.G	143.039	166.125	167.43	163.666	174.064	163.447	120.3	111.059	108.378	121.626	127.668	137.295
sp|P04046|PUR1_YEAST	ADE4	Amidophosphoribosyltransferase	0	U	K.VLIVDDSIVR.G	86.4321	79.4988	79.4276	65.7446	67.9831	75.5932	52.428	40.9953	50.4589	50.5265	53.9183	55.2309
sp|P04046|PUR1_YEAST	ADE4	Amidophosphoribosyltransferase	0	U	R.YMDEDVHR.H	17.6092	11.529	20.5747	27.8386	19.0095	13.0351	20.1813	12.0049	13.3177	12.2503	13.6274	18.5573
sp|P04046|PUR1_YEAST	ADE4	Amidophosphoribosyltransferase	0	U	R.YPTAGSSANSEAQPFYVNSPYGINLAHNGNLVNTASLK.R	10.2501	6.04529	7.98462	8.31495	7.50832	7.30714	13.5147	12.2364	17.2176	15.9348	15.0015	26.4689
sp|P04046|PUR1_YEAST	ADE4	Amidophosphoribosyltransferase	0	U	R.DVFTQQR.V	56.9753	58.2052	61.2305	47.3028	51.0755	40.565	47.5798	51.3119	40.5899	59.2264	50.0663	51.798
sp|P04046|PUR1_YEAST	ADE4	Amidophosphoribosyltransferase	0	U	R.DLKPGEAVIIPK.N	269.753	199.431	226.643	315.895	246.323	268.938	209.465	176.765	242.44	254.524	310.661	332.252
sp|P04046|PUR1_YEAST	ADE4	Amidophosphoribosyltransferase	0	U	R.DLKPGEAVIIPK.N	30.3907	19.0458	26.2617	36.6602	23.2475	25.7981	17.0873	21.8117	34.8797	27.0969	29.9107	28.8211
sp|P04046|PUR1_YEAST	ADE4	Amidophosphoribosyltransferase	0	U	R.KLNPMESEFK.G	98.8044	70.3924	82.3838	196.286	162.077	176.97	75.8972	66.8733	118.187	74.8718	94.5737	136.858
sp|P04046|PUR1_YEAST	ADE4	Amidophosphoribosyltransferase	0	U	K.DYM*LASESVVFK.A	181.392	142.243	127.069	63.6077	82.9543	58.419	78.3819	85.9731	74.6286	89.4957	87.2463	74.6907
sp|P04046|PUR1_YEAST	ADE4	Amidophosphoribosyltransferase	0	U	R.ESIANNSSDMK.A	24.409	28.753	22.5505	34.2486	29.0117	27.4896	30.162	25.7132	33.3632	29.9368	35.1041	39.0323
sp|P04046|PUR1_YEAST	ADE4	Amidophosphoribosyltransferase	0	U	K.LNPMESEFK.G	16.7901	19.4664	13.3813	25.2939	17.2902	21.0571	13.9235	8.78083	10.5787	9.65851	11.974	16.2858
sp|P04046|PUR1_YEAST	ADE4	Amidophosphoribosyltransferase	0	U	K.LNPMESEFK.G	18.4475	18.6457	15.7583	16.8368	13.6791	19.9913	11.1673	10.0373	6.47599	7.59112	9.40317	12.8017
sp|P04046|PUR1_YEAST	ADE4	Amidophosphoribosyltransferase	0	U	K.QLKPEDIDVVIPVPDTAR.T	37.7176	37.7286	31.0307	32.7382	31.0467	34.9862	36.2529	28.0816	24.798	34.926	43.2936	39.5606
sp|P04046|PUR1_YEAST	ADE4	Amidophosphoribosyltransferase	0	U	K.EIVNMAK.E	918.354	931.188	887.969	846.737	852.736	918.093	832.925	810.865	796.594	994.872	1037.94	998.595
sp|P04046|PUR1_YEAST	ADE4	Amidophosphoribosyltransferase	0	U	R.TFIMPNQR.E	123.406	111.019	129.881	134.022	104.211	113.821	102.659	78.4902	94.0977	95.8395	106.785	124.25
sp|P07244|PUR2_YEAST	ADE5,7	Bifunctional purine biosynthetic protein ADE5,7	0	U	R.LQSMAVEHK.I	316.972	317.5	307.616	750.453	724.469	748.458	655.724	669.599	642.849	1406.9	1319.82	1403.31
sp|P07244|PUR2_YEAST	ADE5,7	Bifunctional purine biosynthetic protein ADE5,7	0	U	K.TIDSQIVKPTIDGM*R.R	42.7855	15.5964	11.1819	10.2363	34.9674	15.2509	11.4947	9.22023	5.5749	24.5458	19.9594	10.0974
sp|P07244|PUR2_YEAST	ADE5,7	Bifunctional purine biosynthetic protein ADE5,7	0	U	K.YDSATDSLLTNGGR.V	23.5901	24.738	23.9892	55.9212	46.1859	45.8865	17.6383	19.0864	19.5575	37.1477	35.4771	42.8915
sp|P07244|PUR2_YEAST	ADE5,7	Bifunctional purine biosynthetic protein ADE5,7	0	U	K.VAITYADSGVSVDNGNNLVQTIK.E	6.92774	5.95966	6.68811	12.8376	16.1497	17.5309	8.73796	5.51572	5.98032	13.4187	13.3415	14.3798
sp|P07244|PUR2_YEAST	ADE5,7	Bifunctional purine biosynthetic protein ADE5,7	0	U	K.LAQSPTVGK.I	160.959	134.089	144.182	298.283	260.694	253.432	201.337	204.845	193.044	440.309	455.593	447.229
sp|P07244|PUR2_YEAST	ADE5,7	Bifunctional purine biosynthetic protein ADE5,7	0	U	K.LAQSPTVGK.I	24.931	26.5353	26.5762	45.2971	43.791	40.3766	33.3201	33.7378	31.2553	66.661	56.5963	52.4614
sp|P07244|PUR2_YEAST	ADE5,7	Bifunctional purine biosynthetic protein ADE5,7	0	U	R.LDSVNIGIDDTR.S	58.9244	49.7564	56.3943	110.623	104.117	97.7898	56.4573	47.3656	55.7344	109.939	94.3162	93.3278
sp|P07244|PUR2_YEAST	ADE5,7	Bifunctional purine biosynthetic protein ADE5,7	0	U	K.QFGEEAGK.Q	34.2956	33.5956	34.7498	76.9016	80.4751	68.6684	56.9913	56.6635	52.9964	113.367	124.69	124.934
sp|P07244|PUR2_YEAST	ADE5,7	Bifunctional purine biosynthetic protein ADE5,7	0	U	R.TAVDTVYEAVK.C	510.407	486.831	494.725	693.336	793.616	735.932	339.766	368.633	344.127	660.772	734.848	656.91
sp|P07244|PUR2_YEAST	ADE5,7	Bifunctional purine biosynthetic protein ADE5,7	0	U	K.TNQLVPEVLEYNVR.F	39.2375	35.5662	36.9001	97.2986	100.069	104.24	52.5853	54.1166	46.5721	102.621	96.7116	104.381
sp|P07244|PUR2_YEAST	ADE5,7	Bifunctional purine biosynthetic protein ADE5,7	0	U	K.TNQLVPEVLEYNVR.F	39.8538	38.501	40.2439	100.692	97.3009	96.0979	48.0441	52.8484	46.4587	104.892	102.185	95.9864
sp|P07244|PUR2_YEAST	ADE5,7	Bifunctional purine biosynthetic protein ADE5,7	0	U	K.TNQLVPEVLEYNVR.F	50.3386	53.6528	54.8926	130.66	132.66	128.878	55.7706	58.0836	65.965	123.611	118.276	128.395
sp|P07244|PUR2_YEAST	ADE5,7	Bifunctional purine biosynthetic protein ADE5,7	0	U	R.AFQNSESSK.V	20.9855	22.4365	25.7406	32.6267	31.427	30.6723	15.1385	14.7458	10.7648	31.2759	31.5773	35.2674
sp|P07244|PUR2_YEAST	ADE5,7	Bifunctional purine biosynthetic protein ADE5,7	0	U	K.LPPHTQIFQAGTK.Y	153.136	151.881	155.681	264.158	296.567	268.236	126.984	136.08	120.178	260.292	262.108	250.922
sp|P07244|PUR2_YEAST	ADE5,7	Bifunctional purine biosynthetic protein ADE5,7	0	U	K.LPPHTQIFQAGTK.Y	172.68	185.072	163.382	293.079	351.968	317.568	157.896	165.449	156.58	345.738	310.325	302.524
sp|P07244|PUR2_YEAST	ADE5,7	Bifunctional purine biosynthetic protein ADE5,7	0	U	K.ITLDTDK.L	45.5193	49.5279	47.223	75.1364	77.0419	81.0175	72.0684	75.3546	57.5757	90.1912	76.5628	68.4592
sp|P07244|PUR2_YEAST	ADE5,7	Bifunctional purine biosynthetic protein ADE5,7	0	U	K.TIDSQIVK.P	19.1834	22.1245	28.5629	32.0723	33.4524	33.8477	22.0761	21.9404	19.132	28.1552	34.728	28.3837
sp|P07244|PUR2_YEAST	ADE5,7	Bifunctional purine biosynthetic protein ADE5,7	0	U	R.EHVLVTK.L	706.529	680.47	688.004	1360.98	1308.66	1316.51	1039.3	1115.15	1015.82	2221.5	1951.72	2132.73
sp|P07244|PUR2_YEAST	ADE5,7	Bifunctional purine biosynthetic protein ADE5,7	0	U	K.ITLDTDK.L	121.816	124.134	128.796	171.035	191.615	182.625	186.28	176.004	151.698	212.43	203.634	147.522
sp|P07244|PUR2_YEAST	ADE5,7	Bifunctional purine biosynthetic protein ADE5,7	0	U	K.ADGIAAGK.G	108.503	125.298	118.675	129.668	130.686	111.111	151.513	154.747	214.051	153.823	144.687	150.114
sp|P07244|PUR2_YEAST	ADE5,7	Bifunctional purine biosynthetic protein ADE5,7	0	U	K.IYVAPGNGGTATMDPSR.V	4.12219	3.03309	3.67052	12.4295	9.79144	12.5786	10.3881	6.41075	10.5637	21.0281	15.8002	17.2866
sp|P07244|PUR2_YEAST	ADE5,7	Bifunctional purine biosynthetic protein ADE5,7	0	U	K.LPPHTQIFQAGTK.Y	69.1699	61.8274	73.2519	106.523	104.947	123.291	60.5049	65.655	50.1717	119.002	113.702	112.352
sp|P07244|PUR2_YEAST	ADE5,7	Bifunctional purine biosynthetic protein ADE5,7	0	U	K.QFGEEAGK.Q	37.9638	43.7457	41.2403	112.853	113.781	103.837	88.3321	80.4789	77.9179	171.678	194.227	164.572
sp|P07244|PUR2_YEAST	ADE5,7	Bifunctional purine biosynthetic protein ADE5,7	0	U	K.AAQLEASK.A	100.644	80.3337	76.8718	150.312	148.896	144.379	97.3811	85.526	89.2396	210.322	202.718	187.757
sp|P07244|PUR2_YEAST	ADE5,7	Bifunctional purine biosynthetic protein ADE5,7	0	U	K.IYVAPGNGGTATM*DPSR.V	5.95877	6.81505	2.84373	12.8151	7.24815	9.93111	6.98519	8.57551	7.65792	14.2634	15.5005	16.8494
sp|P07244|PUR2_YEAST	ADE5,7	Bifunctional purine biosynthetic protein ADE5,7	0	U	K.IYVAPGNGGTATMDPSR.V	3.84663	5.34098	2.10881	11.8093	10.573	15.1572	10.0084	7.0563	14.2226	21.4546	21.6981	22.7007
sp|P07244|PUR2_YEAST	ADE5,7	Bifunctional purine biosynthetic protein ADE5,7	0	U	K.TIDSQIVK.P	136.935	131.633	125.456	212.849	253.304	227.605	128.055	132.171	103.552	294.543	261.38	241.375
sp|P07244|PUR2_YEAST	ADE5,7	Bifunctional purine biosynthetic protein ADE5,7	0	U	R.AIPDHLQAR.V	50.7501	55.2591	54.4047	97.5439	105.065	103.981	34.2878	36.734	40.8749	85.6899	87.3541	84.6724
sp|P07244|PUR2_YEAST	ADE5,7	Bifunctional purine biosynthetic protein ADE5,7	0	U	K.LAQSPTVGK.I	92.7094	95.5445	97.5714	154.572	134.503	120.313	108.422	105.694	107.854	180.749	210.793	173.99
sp|P07244|PUR2_YEAST	ADE5,7	Bifunctional purine biosynthetic protein ADE5,7	0	U	R.LDSVNIGIDDTR.S	39.4691	42.1667	37.8183	77.2101	73.7961	71.6019	46.4684	51.2887	42.2575	67.6793	73.9409	72.1068
sp|P07244|PUR2_YEAST	ADE5,7	Bifunctional purine biosynthetic protein ADE5,7	0	U	K.HNIPTASYDVFTNPEEAISFLQAHTDK.A	100.147	82.8892	87.0788	196.238	180.274	185.1	105.838	95.7173	101.445	198.68	224.532	233.212
sp|P07244|PUR2_YEAST	ADE5,7	Bifunctional purine biosynthetic protein ADE5,7	0	U	K.QLLPSIR.Q	36.3871	37.0236	44.2215	79.1724	93.6499	81.0224	31.2071	35.948	31.8838	71.4613	72.424	72.0806
sp|P07244|PUR2_YEAST	ADE5,7	Bifunctional purine biosynthetic protein ADE5,7	0	U	K.YDSATDSLLTNGGR.V	10.1767	13.8942	10.8674	25.4176	25.2167	24.3014	10.4679	10.1847	8.29636	18.7037	18.648	20.3285
sp|P07244|PUR2_YEAST	ADE5,7	Bifunctional purine biosynthetic protein ADE5,7	0	U	K.IYVAPGNGGTATM*DPSR.V	22.3242	12.6177	9.48859	9.6614	15.3566	11.2017	9.34449	9.83331	11.1097	24.9983	17.7897	19.9889
sp|P07244|PUR2_YEAST	ADE5,7	Bifunctional purine biosynthetic protein ADE5,7	0	U	R.VLSVTSTAQDLR.T	20.5652	21.0156	16.8698	37.312	39.7993	32.1449	20.9731	24.9289	24.2508	41.5687	37.5105	30.7491
sp|P07244|PUR2_YEAST	ADE5,7	Bifunctional purine biosynthetic protein ADE5,7	0	U	K.QLLPSIR.Q	128.809	134.464	129.119	248.443	259.005	239.481	96.7993	96.4648	82.3508	204.021	201.016	209.024
sp|P07244|PUR2_YEAST	ADE5,7	Bifunctional purine biosynthetic protein ADE5,7	0	U	K.ITLDTDK.L	57.3478	71.9562	72.7751	102.223	111.478	105.822	63.0354	50.662	65.5542	121.065	110.262	121.673
sp|P07244|PUR2_YEAST	ADE5,7	Bifunctional purine biosynthetic protein ADE5,7	0	U	K.TLGEGILEPTK.I	19.4709	21.8773	21.7736	36.5116	41.2597	34.8851	11.6636	16.3186	17.1585	32.5595	37.1956	36.9176
sp|P07244|PUR2_YEAST	ADE5,7	Bifunctional purine biosynthetic protein ADE5,7	0	U	K.VAITYADSGVSVDNGNNLVQTIK.E	42.8951	39.8341	36.3598	65.1178	63.454	65.6758	38.14	25.6978	40.8758	65.3771	57.8489	61.6096
sp|P07244|PUR2_YEAST	ADE5,7	Bifunctional purine biosynthetic protein ADE5,7	0	U	K.VAITYADSGVSVDNGNNLVQTIK.E	9.45404	9.70601	9.07892	12.2777	15.1423	12.3326	11.2122	13.5336	10.866	17.3638	15.6092	18.5304
sp|P38972|PUR4_YEAST	ADE6	Phosphoribosylformylglycinamidine synthase	0	U	R.LEANSWYPEGK.Y	13.5165	13.3718	12.4209	24.6301	23.7277	24.2693	15.2798	14.2805	9.84105	19.6378	25.2947	26.1697
sp|P38972|PUR4_YEAST	ADE6	Phosphoribosylformylglycinamidine synthase	0	U	K.TTPIDLEM*PILFGKPPK.M	66.6984	58.0019	66.5144	108.562	111.044	114.926	90.6329	95.2268	82.3587	123.593	127.385	133.549
sp|P38972|PUR4_YEAST	ADE6	Phosphoribosylformylglycinamidine synthase	0	U	K.ILNENGVAK.E	22.8416	27.2501	36.2749	38.8993	50.4972	33.6039	31.9516	29.4645	21.3745	43.4926	36.5691	35.7415
sp|P38972|PUR4_YEAST	ADE6	Phosphoribosylformylglycinamidine synthase	0	U	R.VLAM*MPHPER.V	13.9571	29.6275	20.9342	28.5889	30.3101	34.7304	21.4961	19.9926	27.5629	39.5148	32.0035	32.9652
sp|P38972|PUR4_YEAST	ADE6	Phosphoribosylformylglycinamidine synthase	0	U	R.APFAVVGHATAEQK.L	144.482	100.492	113.132	463.019	319.668	293.337	217.289	186.296	327.807	311.233	392.775	559.938
sp|P38972|PUR4_YEAST	ADE6	Phosphoribosylformylglycinamidine synthase	0	U	R.APFAVVGHATAEQK.L	37.4518	36.7012	32.9201	80.3521	52.8302	58.4891	41.7318	43.7809	51.3837	57.7767	56.3692	74.5195
sp|P38972|PUR4_YEAST	ADE6	Phosphoribosylformylglycinamidine synthase	0	U	R.VLAMMPHPER.V	48.3993	69.293	63.124	121.582	90.673	112.873	84.4068	83.3284	79.1614	133.668	139.978	149.07
sp|P38972|PUR4_YEAST	ADE6	Phosphoribosylformylglycinamidine synthase	0	U	K.LSANWMSPASHQGEGSK.L	32.0616	31.4085	32.3094	55.6514	54.8369	52.6832	43.9135	42.3538	55.2759	78.8318	82.2461	97.336
sp|P38972|PUR4_YEAST	ADE6	Phosphoribosylformylglycinamidine synthase	0	U	R.SGTISPWSSK.A	252.512	237.3	239.629	448.042	431.42	442.418	298.818	287.445	270.406	469.342	461.91	463.37
sp|P38972|PUR4_YEAST	ADE6	Phosphoribosylformylglycinamidine synthase	0	U	R.SELEQTWSK.T	82.4097	85.9953	91.002	131.568	153.163	144.109	99.2009	109.665	92.3899	158.985	138.545	154.322
sp|P38972|PUR4_YEAST	ADE6	Phosphoribosylformylglycinamidine synthase	0	U	K.TSYEMQK.L	37.5697	38.3455	31.5705	55.6713	69.0433	75.2423	37.8007	42.8286	42.7382	62.0987	64.1851	68.9714
sp|P38972|PUR4_YEAST	ADE6	Phosphoribosylformylglycinamidine synthase	0	U	R.QLNDAVANNLPSSALGEDTYLIR.V	35.858	34.1565	37.7346	89.9957	100.344	86.4166	74.8399	68.0827	72.5076	116.978	118.154	116.372
sp|P38972|PUR4_YEAST	ADE6	Phosphoribosylformylglycinamidine synthase	0	U	R.QLNDAVANNLPSSALGEDTYLIR.V	59.7965	60.6382	67.1854	152.273	163.38	140.03	133.321	129.364	128.078	206.479	212.161	208.944
sp|P38972|PUR4_YEAST	ADE6	Phosphoribosylformylglycinamidine synthase	0	U	R.SVTGLIDR.D	49.9571	52.6796	55.6871	98.4131	104.402	104.788	87.3129	68.8982	62.7754	148.408	133.284	127.658
sp|P38972|PUR4_YEAST	ADE6	Phosphoribosylformylglycinamidine synthase	0	U	K.IFNADWTIDGIK.Q	59.6544	55.1418	59.996	77.0115	91.577	83.1727	54.2107	70.2394	47.1811	83.5744	82.545	87.628
sp|P38972|PUR4_YEAST	ADE6	Phosphoribosylformylglycinamidine synthase	0	U	R.NVSEQYEAR.V	14.7783	10.3732	11.1281	19.5029	22.5158	18.874	12.1376	15.0829	17.5152	16.1692	12.3851	21.7808
sp|P38972|PUR4_YEAST	ADE6	Phosphoribosylformylglycinamidine synthase	0	U	R.VLAM*MPHPER.V	564.218	280.853	274.691	136.853	510.742	183.857	209.466	224.528	187.382	321.859	278.294	258.618
sp|P38972|PUR4_YEAST	ADE6	Phosphoribosylformylglycinamidine synthase	0	U	R.VLAMM*PHPER.V	319.523	184.683	176.146	119.239	273.324	130.039	136.871	132.221	113.884	193.954	190.749	170.172
sp|P38972|PUR4_YEAST	ADE6	Phosphoribosylformylglycinamidine synthase	0	U	R.VLAM*MPHPER.V	32.3473	17.4938	14.362	6.61584	28.9983	8.72616	14.5776	13.0136	12.5245	17.4285	14.1622	14.3546
sp|P38972|PUR4_YEAST	ADE6	Phosphoribosylformylglycinamidine synthase	0	U	K.SPTVYDNAILK.G	119.967	117.742	112.985	230.531	221.904	214.024	131.903	126.24	107.917	223.073	195.987	211.644
sp|P38972|PUR4_YEAST	ADE6	Phosphoribosylformylglycinamidine synthase	0	U	R.YVDNYGNVTER.F	9.36197	11.5834	7.58033	12.6309	14.6968	16.6495	7.55684	9.38835	9.84467	15.0048	21.8926	14.6816
sp|P38972|PUR4_YEAST	ADE6	Phosphoribosylformylglycinamidine synthase	0	U	R.DPGLQYALTYNPADDM*K.I	9.29904	6.43733	6.50335	15.8847	19.9016	15.6335	10.6588	17.1536	11.9929	28.5228	25.6303	19.5015
sp|P38972|PUR4_YEAST	ADE6	Phosphoribosylformylglycinamidine synthase	0	U	R.DPGLQYALTYNPADDM*K.I	9.79665	14.6906	9.49506	21.8759	21.7978	20.6007	13.6459	16.6277	15.4195	19.0274	17.3938	24.7063
sp|P38972|PUR4_YEAST	ADE6	Phosphoribosylformylglycinamidine synthase	0	U	K.EYISIVGK.P	49.4324	43.1499	52.3359	65.2395	67.9047	66.5003	51.4008	39.5081	46.6003	69.886	67.0694	68.1829
sp|P38972|PUR4_YEAST	ADE6	Phosphoribosylformylglycinamidine synthase	0	U	R.NVSEQYEAR.V	36.0235	34.9696	46.2171	42.7124	40.8875	34.3451	1.97734	3.26594	0	0	3.76027	0.0143529
sp|P38972|PUR4_YEAST	ADE6	Phosphoribosylformylglycinamidine synthase	0	U	R.SGTISPWSSK.A	12.3154	11.601	7.96347	17.9281	18.3888	19.6606	18.0346	10.9499	10.4971	15.1666	17.8335	19.5949
sp|P38972|PUR4_YEAST	ADE6	Phosphoribosylformylglycinamidine synthase	0	U	K.TSYEMQK.L	27.7147	25.224	22.3944	56.5265	50.7008	45.7091	39.3298	38.4044	38.543	65.4647	63.3192	71.7561
sp|P38972|PUR4_YEAST	ADE6	Phosphoribosylformylglycinamidine synthase	0	U	R.YVDNYGNVTER.F	76.1389	71.7313	79.779	134.756	128.663	129.365	75.98	78.7994	81.8212	134.287	139.421	136.007
sp|P38972|PUR4_YEAST	ADE6	Phosphoribosylformylglycinamidine synthase	0	U	K.VETHNHPTAVSPFPGAATGSGGEIR.D	12.6506	20.2863	18.7962	51.9262	44.0799	40.4651	24.705	21.1972	35.0188	43.6072	50.777	56.008
sp|P38972|PUR4_YEAST	ADE6	Phosphoribosylformylglycinamidine synthase	0	U	K.VETHNHPTAVSPFPGAATGSGGEIR.D	5.38182	5.52364	6.36401	16.2348	19.0609	14.5428	8.68486	11.0874	9.46653	11.9481	15.2129	19.3941
sp|P38972|PUR4_YEAST	ADE6	Phosphoribosylformylglycinamidine synthase	0	U	K.VLNHQGK.E	189.527	176.695	195.21	333.642	352.96	355.499	231.39	230.455	229.821	390.925	390.653	384.142
sp|P38972|PUR4_YEAST	ADE6	Phosphoribosylformylglycinamidine synthase	0	U	K.ILNENGVAK.E	112.553	104.881	105.972	172.241	161.483	165.641	99.895	101.699	110.629	143.406	142.624	146.553
sp|P38972|PUR4_YEAST	ADE6	Phosphoribosylformylglycinamidine synthase	0	U	R.SGTISPWSSK.A	7.22738	9.66133	10.5644	19.0422	17.373	21.3364	12.0289	12.8738	10.3515	17.0631	17.4892	16.7706
sp|P38972|PUR4_YEAST	ADE6	Phosphoribosylformylglycinamidine synthase	0	U	R.SGTISPWSSK.A	6.50245	8.70458	8.53789	13.6898	16.8727	15.624	13.3747	9.99669	10.5752	20.8924	15.5117	20.5024
sp|P38972|PUR4_YEAST	ADE6	Phosphoribosylformylglycinamidine synthase	0	U	K.IGLELSSQRPK.V	63.7464	45.782	52.171	106.844	97.5455	109.25	63.2297	65.2084	69.8911	105.493	113.87	111.818
sp|P38972|PUR4_YEAST	ADE6	Phosphoribosylformylglycinamidine synthase	0	U	K.LPIAVAHGEGK.A	25.6738	32.1966	31.6149	56.9272	59.6548	53.2425	32.8335	33.8974	30.0408	60.9898	58.5654	54.8251
sp|P38972|PUR4_YEAST	ADE6	Phosphoribosylformylglycinamidine synthase	0	U	K.QQFTLFQMIR.N	9.90273	6.32421	9.97827	20.7751	14.5101	13.86	8.30777	3.94455	12.0338	9.72445	10.0305	24.1253
sp|P38972|PUR4_YEAST	ADE6	Phosphoribosylformylglycinamidine synthase	0	U	K.ILNENGVAK.E	48.7152	49.5652	43.1424	79.3132	72.5031	73.4172	53.0742	48.4158	44.3485	68.0292	81.6849	73.0483
sp|P38972|PUR4_YEAST	ADE6	Phosphoribosylformylglycinamidine synthase	0	U	R.VLNLPSVGSK.S	63.5682	64.7825	72.3377	124.37	137.991	130.411	132.106	124.801	101.227	210.955	207.954	192.794
sp|P04161|PUR3_YEAST	ADE8	Phosphoribosylglycinamide formyltransferase	0	U	K.LEIIPGEETLEQYEQR.V	156.791	162.793	173.2	299.828	313.328	311.246	219.899	228.14	205.29	404.991	416.332	420.666
sp|P04161|PUR3_YEAST	ADE8	Phosphoribosylglycinamide formyltransferase	0	U	R.SQFENDLAK.L	64.1983	54.708	56.5584	97.8393	94.4184	91.5229	42.9971	42.6448	42.2464	58.3216	76.0582	63.3669
sp|P04161|PUR3_YEAST	ADE8	Phosphoribosylglycinamide formyltransferase	0	U	R.AADNNIPTK.V	565.444	542.295	558.202	834.776	826.788	897.549	467.596	395.149	424.658	716.243	727.411	709.922
sp|P04161|PUR3_YEAST	ADE8	Phosphoribosylglycinamide formyltransferase	0	U	R.VHDAEHIAIVEATYK.V	58.3886	52.1155	49.6862	87.4085	82.2817	70.7055	80.0341	77.7505	70.7647	112.591	110.438	108.927
sp|P04161|PUR3_YEAST	ADE8	Phosphoribosylglycinamide formyltransferase	0	U	R.VHDAEHIAIVEATYK.V	30.4348	27.795	22.6599	38.6619	35.3505	44.5855	31.626	29.7477	32.0858	40.3376	36.8249	38.5839
sp|P04161|PUR3_YEAST	ADE8	Phosphoribosylglycinamide formyltransferase	0	U	K.KLEIIPGEETLEQYEQR.V	16.8505	15.029	9.32986	16.7294	21.419	20.2894	19.2642	18.6854	13.5782	26.5198	24.386	21.4551
sp|P04161|PUR3_YEAST	ADE8	Phosphoribosylglycinamide formyltransferase	0	U	K.KLEIIPGEETLEQYEQR.V	22.9664	22.0021	20.1348	40.219	39.2434	37.5154	34.412	37.1185	38.9749	47.3538	51.5412	43.512
sp|P04161|PUR3_YEAST	ADE8	Phosphoribosylglycinamide formyltransferase	0	U	K.KLEIIPGEETLEQYEQR.V	8.54097	8.43206	10.3901	9.40633	11.1355	11.5205	10.108	11.4501	14.1259	14.5717	14.8246	17.1136
sp|P04161|PUR3_YEAST	ADE8	Phosphoribosylglycinamide formyltransferase	0	U	K.KLEIIPGEETLEQYEQR.V	41.5552	43.5707	41.198	74.9695	76.6861	66.6147	69.4138	60.2544	70.3594	96.9815	94.8396	93.3696
sp|P04161|PUR3_YEAST	ADE8	Phosphoribosylglycinamide formyltransferase	0	U	K.KLEIIPGEETLEQYEQR.V	34.2342	43.4771	36.6205	66.4715	65.4479	60.4429	51.9685	60.1	53.2428	77.5317	82.4964	75.257
sp|P04161|PUR3_YEAST	ADE8	Phosphoribosylglycinamide formyltransferase	0	U	R.SQFENDLAK.L	78.8803	75.575	81.4315	130.741	137.372	140.506	61.0422	66.9164	63.514	104.595	99.3732	94.7641
sp|P04161|PUR3_YEAST	ADE8	Phosphoribosylglycinamide formyltransferase	0	U	K.GEPLVVK.K	162.349	168.437	142.623	197.129	236.639	239.626	140.598	149.62	145.767	219.65	203.225	204.394
sp|P04161|PUR3_YEAST	ADE8	Phosphoribosylglycinamide formyltransferase	0	U	K.QGQLGEDAHIVSVISSSK.K	100.831	121.394	109.381	138.395	151.254	139.28	92.7388	88.0803	96.4144	141.422	133.427	139.6
sp|P04161|PUR3_YEAST	ADE8	Phosphoribosylglycinamide formyltransferase	0	U	K.QGQLGEDAHIVSVISSSK.K	50.8874	47.9135	52.661	66.533	62.9925	69.5402	52.8148	51.7029	48.8406	73.079	72.6968	76.4401
sp|P04161|PUR3_YEAST	ADE8	Phosphoribosylglycinamide formyltransferase	0	U	R.AADNNIPTK.V	426.15	427.473	412.788	642.572	646.953	706.325	318.851	323.926	292.85	536.502	505.595	520.283
sp|P00330|ADH1_YEAST	ADH1	Alcohol dehydrogenase 1	0	U	R.VLGIDGGEGK.E	17.9335	19.135	18.4394	27.0348	39.4952	33.1072	33.5752	30.2358	30.1986	40.8807	39.8524	39.2335
sp|P00330|ADH1_YEAST	ADH1	Alcohol dehydrogenase 1	0	U	R.VLGIDGGEGK.E	119.636	112.01	143.301	229.817	275.489	276.885	267.482	276.305	231.756	321.841	332.974	290.766
sp|P00330|ADH1_YEAST	ADH1	Alcohol dehydrogenase 1	0	U	R.ANGTTVLVGM*PAGAK.C	265.399	195.74	182.684	122.226	216.413	135.554	180.622	187.068	159.925	162.827	161.606	181.769
sp|P00330|ADH1_YEAST	ADH1	Alcohol dehydrogenase 1	0	U	R.VLGIDGGEGK.E	39.5196	43.496	44.5592	51.5238	66.3638	64.7953	51.4572	63.2601	36.806	58.8876	66.9392	57.0975
sp|P00330|ADH1_YEAST	ADH1	Alcohol dehydrogenase 1	0	U	R.ANGTTVLVGM*PAGAK.C	124.089	93.0047	100.62	126.032	143.476	145.731	122.462	115.086	94.6614	123.465	137.237	127.341
sp|P00330|ADH1_YEAST	ADH1	Alcohol dehydrogenase 1	0	U	K.GVIFYESHGK.L	133.154	126.802	131.48	291.667	259.077	273.121	233.589	221.167	228.351	277.848	267.964	288.903
sp|P00330|ADH1_YEAST	ADH1	Alcohol dehydrogenase 1	0	U	R.VLGIDGGEGK.E	55.1014	52.2835	48.5498	73.1478	72.2082	77.781	90.1589	84.9725	74.3033	98.2231	94.9245	83.5953
sp|P00330|ADH1_YEAST	ADH1	Alcohol dehydrogenase 1	0	U	K.ATDGGAHGVINVSVSEAAIEASTR.Y	24.7669	24.0839	32.6487	56.1929	49.8717	38.4135	48.9836	47.4651	48.9324	39.18	49.1443	55.1666
sp|P00330|ADH1_YEAST	ADH1	Alcohol dehydrogenase 1	0	U	K.ATDGGAHGVINVSVSEAAIEASTR.Y	46.0543	41.0437	42.4349	70.8501	80.0658	65.0502	63.186	71.3113	61.3567	68.6229	91.8477	91.6386
sp|P00330|ADH1_YEAST	ADH1	Alcohol dehydrogenase 1	0	U	K.ATDGGAHGVINVSVSEAAIEASTR.Y	8.21562	5.17588	7.85211	16.6898	17.2632	13.2329	12.6459	21.6369	15.156	17.9541	21.3705	19.5956
sp|P00330|ADH1_YEAST	ADH1	Alcohol dehydrogenase 1	0	U	K.ANELLINVK.Y	282.191	287.339	256.858	533.546	538.286	542.73	518.076	521.217	480.129	628.833	624.742	576.354
sp|P00330|ADH1_YEAST	ADH1	Alcohol dehydrogenase 1	0	U	K.GVIFYESHGK.L	97.5344	127.43	89.5723	173.131	167.821	164.767	148.89	181.023	153.583	161.67	189.11	189.697
sp|P00330|ADH1_YEAST	ADH1	Alcohol dehydrogenase 1	0	U	R.ANGTTVLVGMPAGAK.C	73.4965	75.7433	73.5815	124.041	144.058	123.772	102.585	108.318	86.3283	104.76	117.121	114.063
sp|P00330|ADH1_YEAST	ADH1	Alcohol dehydrogenase 1	0	U	R.ANGTTVLVGMPAGAK.C	125.61	124.283	126.217	223.932	221.796	219.233	182.516	195.738	170.238	177.761	219.007	220.247
sp|P00330|ADH1_YEAST	ADH1	Alcohol dehydrogenase 1	0	U	K.ATDGGAHGVINVSVSEAAIEASTR.Y	17.0856	10.0696	11.8935	16.0673	17.1282	12.2316	17.9703	11.541	14.2366	16.9671	17.7877	15.9001
sp|P00330|ADH1_YEAST	ADH1	Alcohol dehydrogenase 1	0	U	K.ATDGGAHGVINVSVSEAAIEASTR.Y	21.3746	7.45683	13.0596	25.1247	22.2979	22.6122	17.9218	23.8591	17.3202	27.2418	28.7231	25.8676
sp|P00330|ADH1_YEAST	ADH1	Alcohol dehydrogenase 1	0	U	R.ANGTTVLVGM*PAGAK.C	127.97	123.031	137.777	227.948	211.064	232.727	189.311	206.067	181.164	182.886	203.241	247.874
sp|P00330|ADH1_YEAST	ADH1	Alcohol dehydrogenase 1	0	U	R.ANGTTVLVGM*PAGAK.C	39.2768	50.2283	48.7239	67.9268	68.9178	69.6235	64.7594	64.9829	54.1885	69.066	64.1539	72.3705
sp|P00330|ADH1_YEAST	ADH1	Alcohol dehydrogenase 1	0	U	K.GVIFYESHGKLEYK.D	43.9939	53.0908	41.6686	112.263	120.506	78.6617	98.079	56.3023	57.456	70.1455	52.5679	69.6507
sp|P00330|ADH1_YEAST	ADH1	Alcohol dehydrogenase 1	0	U	K.ATDGGAHGVINVSVSEAAIEASTR.Y	10.8662	6.65099	12.1991	18.7505	17.0207	15.4026	20.4611	16.1856	18.0603	17.6704	17.0695	24.4789
sp|P00330|ADH1_YEAST	ADH1	Alcohol dehydrogenase 1	0	U	K.ATDGGAHGVINVSVSEAAIEASTR.Y	12.5907	11.236	12.2387	16.288	20.2795	16.9111	11.8143	21.9505	19.7098	21.285	18.5501	25.7646
sp|P00330|ADH1_YEAST	ADH1	Alcohol dehydrogenase 1	0	U	K.DIVGAVLK.A	26.3319	27.0652	23.223	42.8868	51.8905	48.7625	38.6195	38.3397	30.5627	52.9118	47.6446	43.375
sp|P00330|ADH1_YEAST	ADH1	Alcohol dehydrogenase 1	0	U	K.ATDGGAHGVINVSVSEAAIEASTR.Y	13.2541	11.043	12.5091	22.4605	20.1559	17.6489	20.0609	24.8024	11.7585	15.9643	23.9306	21.3103
sp|P00330|ADH1_YEAST	ADH1	Alcohol dehydrogenase 1	0	U	K.ATDGGAHGVINVSVSEAAIEASTR.Y	12.9135	15.4193	11.6678	24.7099	29.9874	23.5249	19.4079	31.0877	24.548	24.0689	26.9709	24.7058
sp|P00330|ADH1_YEAST	ADH1	Alcohol dehydrogenase 1	0	U	K.ANELLINVK.Y	414.505	426.683	533.718	503.813	331.361	298.139	420.133	454.876	698.967	659.849	581.078	571.799
sp|P00330|ADH1_YEAST	ADH1	Alcohol dehydrogenase 1	0	U	K.ATDGGAHGVINVSVSEAAIEASTR.Y	22.5493	19.0621	21.5128	36.3646	37.6527	36.3668	33.5032	31.5932	33.365	42.3656	38.2939	43.107
sp|P00330|ADH1_YEAST	ADH1	Alcohol dehydrogenase 1	0	U	K.VVGLSTLPEIYEK.M	41.0869	38.7344	46.4724	42.3726	31.8436	30.242	46.135	49.2035	57.4225	57.0911	44.1324	56.5375
sp|P00330|ADH1_YEAST	ADH1	Alcohol dehydrogenase 1	0	U	K.ATDGGAHGVINVSVSEAAIEASTR.Y	42.1351	39.054	51.8039	80.163	84.1045	62.1018	68.8421	67.0154	62.8461	67.3902	72.239	76.2791
sp|P00330|ADH1_YEAST	ADH1	Alcohol dehydrogenase 1	0	U	K.ATDGGAHGVINVSVSEAAIEASTR.Y	60.8348	47.6459	63.1155	103.498	95.7166	88.1306	82.8794	86.7518	92.167	89.1481	100.508	122.492
sp|P00330|ADH1_YEAST	ADH1	Alcohol dehydrogenase 1	0	U	K.ATDGGAHGVINVSVSEAAIEASTR.Y	22.9891	25.3074	35.6495	48.5995	41.3382	40.8636	38.1909	44.2635	35.9988	48.8303	43.3516	53.4271
sp|P00330|ADH1_YEAST	ADH1	Alcohol dehydrogenase 1	0	U	K.ATDGGAHGVINVSVSEAAIEASTR.Y	51.1992	42.4816	46.8815	77.902	73.9374	69.0873	66.0537	73.4479	68.4348	74.4724	79.8571	90.2636
sp|P00330|ADH1_YEAST	ADH1	Alcohol dehydrogenase 1	0	U	K.DIVGAVLK.A	11.7039	13.4064	17.6722	17.0094	9.73348	11.4133	12.942	13.2554	19.1453	17.54	19.3714	11.7449
sp|P00330|ADH1_YEAST	ADH1	Alcohol dehydrogenase 1	0	U	K.ATDGGAHGVINVSVSEAAIEASTR.Y	12.5246	9.36754	10.3315	19.7314	17.0791	14.7327	15.1671	15.0855	13.6952	16.3107	19.0304	15.3396
sp|P00330|ADH1_YEAST	ADH1	Alcohol dehydrogenase 1	0	U	K.ATDGGAHGVINVSVSEAAIEASTR.Y	26.5952	18.2064	21.9775	32.2725	30.9701	36.2935	32.8077	29.3827	33.8769	29.2994	41.9409	37.1415
sp|P00330|ADH1_YEAST	ADH1	Alcohol dehydrogenase 1	0	U	K.ATDGGAHGVINVSVSEAAIEASTR.Y	22.7823	16.7685	24.374	32.5956	24.7898	27.6779	18.0705	27.0811	22.996	25.507	24.8045	35.2486
sp|P00330|ADH1_YEAST	ADH1	Alcohol dehydrogenase 1	0	U	K.DIVGAVLK.A	71.7476	77.038	98.171	90.8151	48.5214	48.9283	64.3536	74.1139	111.859	91.2571	89.5968	98.0873
sp|P00330|ADH1_YEAST	ADH1	Alcohol dehydrogenase 1	0	U	K.GVIFYESHGK.L	629.835	603.409	576.158	1279.91	1237.94	1281.42	1076.99	1127.91	1131.79	1386.73	1312.94	1332.36
sp|P00330|ADH1_YEAST	ADH1	Alcohol dehydrogenase 1	0	U	K.GVIFYESHGK.L	16.8954	10.6913	10.2146	23.7656	24.3768	27.6387	27.4076	25.9684	20.2474	26.5289	29.8949	28.7637
sp|P00330|ADH1_YEAST	ADH1	Alcohol dehydrogenase 1	0	U	K.GVIFYESHGK.L	108.533	102.596	134.187	264.658	270.763	268.201	227.994	226.393	249.47	291.673	313.405	320.128
sp|P00330|ADH1_YEAST	ADH1	Alcohol dehydrogenase 1	0	U	K.GVIFYESHGK.L	171.165	170.842	171.956	209.296	257.783	259.169	225.231	235.702	181.074	285.638	251.746	211.758
sp|P00330|ADH1_YEAST	ADH1	Alcohol dehydrogenase 1	0	U	R.ANGTTVLVGM*PAGAK.C	17.6333	11.7118	18.3495	30.0038	26.5634	23.8219	22.9162	23.7572	20.3182	22.846	23.0263	21.4068
sp|P00330|ADH1_YEAST	ADH1	Alcohol dehydrogenase 1	0	U	K.GVIFYESHGK.L	77.7001	101.386	65.2915	108.096	121.35	103.907	89.9243	116.202	90.6323	103.535	112.409	112.757
sp|P00330|ADH1_YEAST	ADH1	Alcohol dehydrogenase 1	0	U	K.GVIFYESHGK.L	91.9302	97.7916	70.4083	126.109	115.813	112.084	112.169	135.083	87.0329	132.264	131.48	122.247
sp|P00330|ADH1_YEAST	ADH1	Alcohol dehydrogenase 1	0	U	K.ATDGGAHGVINVSVSEAAIEASTR.Y	73.2006	54.9337	68.8193	126.616	108.462	102.927	99.0349	105.097	109.166	108.276	120.527	115.161
sp|P00330|ADH1_YEAST	ADH1	Alcohol dehydrogenase 1	0	U	K.ATDGGAHGVINVSVSEAAIEASTR.Y	112.763	88.715	95.5531	162.927	161.674	152.842	123.617	143.555	155.688	159.932	164.27	189.701
sp|P00330|ADH1_YEAST	ADH1	Alcohol dehydrogenase 1	0	U	K.ATDGGAHGVINVSVSEAAIEASTR.Y	16.1505	17.1429	12.4601	21.0289	21.4484	21.8137	19.2593	14.897	22.0654	23.163	22.3744	22.6374
sp|P00330|ADH1_YEAST	ADH1	Alcohol dehydrogenase 1	0	U	K.ATDGGAHGVINVSVSEAAIEASTR.Y	25.2112	35.5502	39.6092	45.8248	56.5185	46.4885	42.9343	55.2159	45.6468	55.3076	52.0092	60.681
sp|P00330|ADH1_YEAST	ADH1	Alcohol dehydrogenase 1	0	U	K.GVIFYESHGK.L	67.4225	81.2566	79.5047	100.419	101.377	114.61	95.3593	86.0023	87.3867	103.641	119.665	99.0907
sp|P00330|ADH1_YEAST	ADH1	Alcohol dehydrogenase 1	0	U	K.SANLM*AGHWVAISGAAGGLGSLAVQYAK.A	11.2855	12.2583	13.3396	11.3029	14.9966	13.5155	13.2974	15.1342	13.1186	9.93448	9.47434	8.56086
sp|P00330|ADH1_YEAST	ADH1	Alcohol dehydrogenase 1	0	U	R.VLGIDGGEGK.E	83.3807	109.064	94.241	149.156	190.546	164.076	152.462	177.014	145.216	200.991	176.871	169.807
sp|P00330|ADH1_YEAST	ADH1	Alcohol dehydrogenase 1	0	U	R.VLGIDGGEGK.E	102.75	157.795	100.984	168.235	204.874	173.179	130.337	184.247	125.995	176.902	168.788	148.401
sp|P00330|ADH1_YEAST	ADH1	Alcohol dehydrogenase 1	0	U	R.VLGIDGGEGK.E	7.29425	5.32422	8.14834	12.0541	11.4565	11.9489	11.3968	12.5902	11.7196	19.4015	14.5051	12.1561
sp|P00331|ADH2_YEAST	ADH2	Alcohol dehydrogenase 2	0	U	K.AIIFYESNGK.L	101.643	94.3973	100.154	26.4437	21.922	22.7845	33.0216	36.1519	34.4414	7.72166	10.9826	9.16774
sp|P00331|ADH2_YEAST	ADH2	Alcohol dehydrogenase 2	0	U	R.VLGIDGGPGK.E	345.477	360.324	363.661	92.3396	110.173	107.34	156.109	158.436	156.877	75.0555	60.2531	59.2625
sp|P00331|ADH2_YEAST	ADH2	Alcohol dehydrogenase 2	0	U	R.VLGIDGGPGK.E	946.59	1029.61	1001.6	217.961	248.721	270.709	353.643	353.446	323.555	55.9254	48.6978	42.5387
sp|P00331|ADH2_YEAST	ADH2	Alcohol dehydrogenase 2	0	U	K.AIIFYESNGK.L	620.034	590.328	590.713	163.122	140.522	192.905	171.041	153.82	161.293	11.2481	12.4677	13.291
sp|P00331|ADH2_YEAST	ADH2	Alcohol dehydrogenase 2	0	U	K.AIIFYESNGK.L	66.0696	61.971	67.2567	24.1446	22.8404	19.4346	20.6045	22.3144	23.2785	10.1585	13.9015	8.36428
sp|P00331|ADH2_YEAST	ADH2	Alcohol dehydrogenase 2	0	U	R.ANGTVVLVGLPAGAK.C	778.943	794.301	768.26	93.4702	113.005	151.962	115.758	115.586	113.447	0.304393	0.164824	5.96007
sp|P00331|ADH2_YEAST	ADH2	Alcohol dehydrogenase 2	0	U	R.ANGTVVLVGLPAGAK.C	545.765	520.336	527.068	96.9919	86.9771	120.727	86.4629	103.704	87.3157	6.94719	6.78031	11.2812
sp|P00331|ADH2_YEAST	ADH2	Alcohol dehydrogenase 2	0	U	R.ANGTVVLVGLPAGAK.C	78.7503	85.0848	86.5855	17.9264	17.2669	14.2098	16.2134	14.5987	12.6322	3.44989	4.10496	2.52794
sp|P00331|ADH2_YEAST	ADH2	Alcohol dehydrogenase 2	0	U	R.ANGTVVLVGLPAGAK.C	37.9892	35.9625	30.1854	5.47569	7.54569	8.45379	3.53848	7.0395	6.41271	0	0	0.025026
sp|P00331|ADH2_YEAST	ADH2	Alcohol dehydrogenase 2	0	U	R.ANGTVVLVGLPAGAK.C	84.4876	84.8858	97.3129	23.7569	22.8273	15.983	15.5234	17.1105	13.6761	1.75805	0	3.26723
sp|P00331|ADH2_YEAST	ADH2	Alcohol dehydrogenase 2	0	U	K.DIVSAVVK.A	177.73	171.332	173.671	54.7152	61.3379	47.9267	69.0332	69.5414	63.789	33.7916	24.782	28.8813
sp|P00331|ADH2_YEAST	ADH2	Alcohol dehydrogenase 2	0	U	K.ATNGGAHGIINVSVSEAAIEASTR.Y	67.517	60.6091	49.7857	17.5263	13.2862	14.8526	15.5685	15.6306	10.8495	4.63358	0	0
sp|P00331|ADH2_YEAST	ADH2	Alcohol dehydrogenase 2	0	U	R.AGHWAAISGAAGGLGSLAVQYAK.A	19.0154	17.5099	19.1413	9.22745	8.05223	10.4928	29.3759	22.1267	32.0944	13.9679	14.761	13.3276
sp|P00331|ADH2_YEAST	ADH2	Alcohol dehydrogenase 2	0	U	K.VVGLSSLPEIYEK.M	25.8825	28.3176	20.9438	9.2981	8.95872	6.75758	8.0917	8.96487	8.2445	2.26005	2.87324	2.95398
sp|P00331|ADH2_YEAST	ADH2	Alcohol dehydrogenase 2	0	U	R.VLGIDGGPGK.E	635.659	669.75	592.851	106.538	162.021	159.659	184.366	206.118	179.048	8.88459	16.7218	18.5551
sp|P00331|ADH2_YEAST	ADH2	Alcohol dehydrogenase 2	0	U	R.VLGIDGGPGK.E	257.358	271.058	311.366	122.319	104.858	91.4607	113.261	111.217	95.1511	31.0701	29.2434	18.0256
sp|P00331|ADH2_YEAST	ADH2	Alcohol dehydrogenase 2	0	U	K.AIIFYESNGK.L	34.3986	39.7454	43.9594	30.3061	30.6374	19.9701	8.19222	9.40974	12.1918	2.42515	6.63098	3.45162
sp|P00331|ADH2_YEAST	ADH2	Alcohol dehydrogenase 2	0	U	K.ATNGGAHGIINVSVSEAAIEASTR.Y	59.0763	52.9006	46.8223	11.4741	15.9033	9.27434	15.3285	13.5458	12.7849	0	5.33714	4.11844
sp|P00331|ADH2_YEAST	ADH2	Alcohol dehydrogenase 2	0	U	K.AIIFYESNGK.L	515.293	476.825	465.625	128.68	127.392	145.985	146.463	142.645	158.113	24.321	19.995	13.7029
sp|P00331|ADH2_YEAST	ADH2	Alcohol dehydrogenase 2	0	U	K.AIIFYESNGK.L	33.4621	32.3382	34.4867	7.15538	6.19261	7.49542	5.71005	9.2538	8.48778	0	0	0.0321863
sp|P00331|ADH2_YEAST	ADH2	Alcohol dehydrogenase 2	0	U	R.ANGTVVLVGLPAGAK.C	197.389	205.388	203.468	37.1469	45.6537	50.2345	34.727	30.3774	27.9898	0	4.57252	3.7635
sp|P00331|ADH2_YEAST	ADH2	Alcohol dehydrogenase 2	0	U	R.AGHWAAISGAAGGLGSLAVQYAK.A	474.38	506.434	508.076	142.634	118.01	135.064	143.344	139.233	151.89	38.6219	34.0347	35.0541
sp|P00331|ADH2_YEAST	ADH2	Alcohol dehydrogenase 2	0	U	K.AIIFYESNGKLEHKDIPVPK.P	291.88	289.898	285.693	166.022	115.939	127.966	100.875	88.2609	118.739	42.215	52.5016	49.6256
sp|P00331|ADH2_YEAST	ADH2	Alcohol dehydrogenase 2	0	U	K.PKPNELLINVK.Y	1074.53	860.333	1104.12	293.991	297.97	294.545	309.747	262.711	328.204	27.9382	22.1446	24.4884
sp|P00331|ADH2_YEAST	ADH2	Alcohol dehydrogenase 2	0	U	K.VVGLSSLPEIYEK.M	33.7778	30.7014	24.896	6.46528	3.38518	3.22431	7.56143	9.77708	9.08544	3.86236	3.20814	3.9231
sp|P00331|ADH2_YEAST	ADH2	Alcohol dehydrogenase 2	0	U	R.AGHWAAISGAAGGLGSLAVQYAK.A	108.047	114.172	121.717	38.7495	25.2587	33.9974	27.3011	24.3172	32.5879	4.34214	4.17502	6.83333
sp|P07246|ADH3_YEAST	ADH3	Alcohol dehydrogenase 3, mitochondrial	0	U	K.GSYVGNR.A	34.4424	31.8153	35.3066	32.4138	37.9519	38.5472	17.3679	16.4896	12.4026	11.4859	16.2247	18.2815
sp|P07246|ADH3_YEAST	ADH3	Alcohol dehydrogenase 3, mitochondrial	0	U	K.VYDLM*EK.G	230.775	242.702	275.996	426.915	375.355	426.719	144.564	143.698	145.351	185.849	171.778	178.641
sp|P07246|ADH3_YEAST	ADH3	Alcohol dehydrogenase 3, mitochondrial	0	U	K.VYDLMEK.G	55.6079	67.4943	55.0292	76.5014	81.361	74.7233	35.0906	33.9847	36.6315	29.4925	31.9858	32.9162
sp|P07246|ADH3_YEAST	ADH3	Alcohol dehydrogenase 3, mitochondrial	0	U	K.VYDLMEK.G	56.4435	50.1518	58.9703	89.4687	87.3671	77.2184	29.0374	31.1183	35.6742	32.277	36.4298	32.6649
sp|P07246|ADH3_YEAST	ADH3	Alcohol dehydrogenase 3, mitochondrial	0	U	R.EALDFFSR.G	40.2689	39.7792	35.1387	65.5156	67.9848	66.6601	15.4174	15.4577	15.4779	21.5251	17.007	18.2825
sp|P07246|ADH3_YEAST	ADH3	Alcohol dehydrogenase 3, mitochondrial	0	U	K.VGDLAGIK.W	1041.38	1094.08	1124.97	1824.46	1709.63	1820.68	468.829	452	490.777	637.745	655.684	604.528
sp|P07246|ADH3_YEAST	ADH3	Alcohol dehydrogenase 3, mitochondrial	0	U	K.GVIFYENK.G	415.283	410.224	428.322	689.834	702.778	742.552	165.636	164.498	185.162	210.268	220.793	217.026
sp|P07246|ADH3_YEAST	ADH3	Alcohol dehydrogenase 3, mitochondrial	0	U	K.GVIFYENK.G	113.431	117.498	113.492	184.921	191.421	186.796	49.1431	44.7031	43.3248	61.6297	65.251	56.314
sp|P07246|ADH3_YEAST	ADH3	Alcohol dehydrogenase 3, mitochondrial	0	U	K.VGDLAGIK.W	44.7097	49.0424	54.588	71.8897	75.2557	67.4796	24.6713	15.2008	20.3428	29.3681	25.8111	20.2495
sp|P07246|ADH3_YEAST	ADH3	Alcohol dehydrogenase 3, mitochondrial	0	U	K.GVIFYENK.G	393.185	430.016	422.499	675.593	727.975	733.122	199.364	195.729	200.179	248.324	233.516	229.356
sp|P07246|ADH3_YEAST	ADH3	Alcohol dehydrogenase 3, mitochondrial	0	U	K.GVIFYENK.G	462.638	444.281	441.718	749.051	768.33	782.471	177.827	182.609	217.757	233.895	252.475	240.943
sp|P07246|ADH3_YEAST	ADH3	Alcohol dehydrogenase 3, mitochondrial	0	U	K.DIPVPEPK.P	558.485	680.181	653.302	710.281	908.581	899.218	257.832	285.235	215.307	357.561	330.816	286.752
sp|P07246|ADH3_YEAST	ADH3	Alcohol dehydrogenase 3, mitochondrial	0	U	K.IVGLSELPK.V	248.323	230.464	241.683	392.621	395.598	402.749	116.327	105.042	118.898	126.894	144.217	129.93
sp|P07246|ADH3_YEAST	ADH3	Alcohol dehydrogenase 3, mitochondrial	0	U	K.IVGLSELPK.V	40.2106	45.3157	54.5006	89.7426	76.0714	74.4023	21.0607	26.828	24.6264	39.0396	34.0888	33.4506
sp|P07246|ADH3_YEAST	ADH3	Alcohol dehydrogenase 3, mitochondrial	0	U	K.NMVSDIQEATK.G	215.54	234.8	240.141	358.556	366.905	395.347	112.296	122.469	109.179	146.424	144.523	122.139
sp|P07246|ADH3_YEAST	ADH3	Alcohol dehydrogenase 3, mitochondrial	0	U	R.EALDFFSR.G	184.362	181.189	181.81	309.243	311.775	296.469	71.9063	60.2611	74.9813	101.077	88.2489	86.7163
sp|P07246|ADH3_YEAST	ADH3	Alcohol dehydrogenase 3, mitochondrial	0	U	R.VLGIDAGEEK.E	263.42	266.519	252.214	340.227	417.319	368.277	121.553	102.659	104.613	155.637	153.511	143.883
sp|P07246|ADH3_YEAST	ADH3	Alcohol dehydrogenase 3, mitochondrial	0	U	R.EALDFFSR.G	51.5219	58.5361	64.7431	83.3666	88.2392	84.4155	50.6545	54.7614	59.2791	65.8385	64.229	55.1713
sp|P07246|ADH3_YEAST	ADH3	Alcohol dehydrogenase 3, mitochondrial	0	U	R.VLGIDAGEEK.E	25.7979	21.7231	26.4681	34.5812	37.5975	28.0292	12.9025	11.7329	10.3863	11.8807	13.2654	14.4658
sp|P07246|ADH3_YEAST	ADH3	Alcohol dehydrogenase 3, mitochondrial	0	U	R.VLGIDAGEEK.E	146.581	132.844	157.249	199.794	210.77	192.421	98.5752	80.4513	88.3956	103.679	99.9471	98.591
sp|P07246|ADH3_YEAST	ADH3	Alcohol dehydrogenase 3, mitochondrial	0	U	R.VLGIDAGEEK.E	269.286	299.317	263.195	393.731	432.235	421.035	135.469	160.144	136.905	197.898	175.713	165.686
sp|P07246|ADH3_YEAST	ADH3	Alcohol dehydrogenase 3, mitochondrial	0	U	K.VYDLM*EK.G	91.8189	64.393	69.5401	52.593	103.589	63.4942	16.7378	24.2652	22.9644	23.2463	26.6258	17.6767
sp|P07246|ADH3_YEAST	ADH3	Alcohol dehydrogenase 3, mitochondrial	0	U	K.GVIFYENK.G	461.667	462.597	499.215	797.117	750.778	829.358	195.625	169.678	208.018	266.484	283.299	242.994
sp|P07246|ADH3_YEAST	ADH3	Alcohol dehydrogenase 3, mitochondrial	0	U	K.DIPVPEPK.P	323.434	337.593	393.61	450.345	521.318	478.791	140.361	164.247	140.32	194.707	192.648	151.776
sp|P07246|ADH3_YEAST	ADH3	Alcohol dehydrogenase 3, mitochondrial	0	U	K.IVGLSELPK.V	309.641	286.128	295.298	460.056	469.064	460.236	116.401	126.784	142.612	168.375	171.651	142.858
sp|P07246|ADH3_YEAST	ADH3	Alcohol dehydrogenase 3, mitochondrial	0	U	K.NMVSDIQEATK.G	13.2132	10.7765	6.64667	15.6406	16.2769	14.816	4.8134	4.51337	8.98592	7.2314	3.98355	2.74063
sp|P07246|ADH3_YEAST	ADH3	Alcohol dehydrogenase 3, mitochondrial	0	U	R.EALDFFSR.G	52.5556	46.2672	54.0033	76.861	82.4932	82.3228	21.6058	18.1485	20.014	24.7931	28.7137	24.6743
sp|P07246|ADH3_YEAST	ADH3	Alcohol dehydrogenase 3, mitochondrial	0	U	R.VLGIDAGEEK.E	24.3995	19.3828	25.1854	34.2061	26.2631	30.2771	23.2083	14.4421	12.3756	15.3926	15.0267	14.7014
sp|P07246|ADH3_YEAST	ADH3	Alcohol dehydrogenase 3, mitochondrial	0	U	R.EALDFFSR.G	29.9591	27.2637	29.9017	38.8265	40.066	35.5855	24.693	16.7993	20.3211	30.6347	22.5169	20.7679
sp|P07246|ADH3_YEAST	ADH3	Alcohol dehydrogenase 3, mitochondrial	0	U	K.GVIFYENK.G	46.2292	46.8683	38.1946	56.1098	64.1961	72.1557	30.031	23.6419	30.1908	52.8826	27.6062	36.914
sp|P07246|ADH3_YEAST	ADH3	Alcohol dehydrogenase 3, mitochondrial	0	U	K.VYDLMEK.G	134.172	119.75	124.354	183.322	189.068	176.859	77.9591	77.2897	80.4004	96.739	96.5062	91.4848
sp|P07246|ADH3_YEAST	ADH3	Alcohol dehydrogenase 3, mitochondrial	0	U	K.LGGEVFIDFTK.T	32.5795	29.0765	35.9489	48.7365	48.0668	54.9399	12.1828	12.9123	17.3485	18.8014	16.0569	21.7845
sp|P07246|ADH3_YEAST	ADH3	Alcohol dehydrogenase 3, mitochondrial	0	U	K.LGGEVFIDFTK.T	272.996	272.324	303.617	480.777	444.57	474.442	115.196	110.805	115.147	162.526	172.841	169.529
sp|P07246|ADH3_YEAST	ADH3	Alcohol dehydrogenase 3, mitochondrial	0	U	K.NMVSDIQEATK.G	237.801	200.75	196.386	343.882	361.585	339.655	97.0423	83.3851	88.3819	117.829	111.616	112.207
sp|P07246|ADH3_YEAST	ADH3	Alcohol dehydrogenase 3, mitochondrial	0	U	R.EALDFFSR.G	143.261	138.745	144.637	248.72	263.548	239.25	66.3132	58.4037	67.7912	71.5759	88.2486	78.8512
sp|P07246|ADH3_YEAST	ADH3	Alcohol dehydrogenase 3, mitochondrial	0	U	K.SEVFSHVVK.S	215.589	212.26	209.53	262.881	262.017	261.012	116.008	123.77	114.991	123.456	118.956	127.131
sp|P07246|ADH3_YEAST	ADH3	Alcohol dehydrogenase 3, mitochondrial	0	U	K.VYDLM*EK.G	90.7322	95.8127	86.8927	147.414	122.777	128.958	43.9581	48.542	47.0112	47.7513	47.2213	52.4143
sp|P10127|ADH4_YEAST	ADH4	Alcohol dehydrogenase 4	0	U	K.EQNSEIVVSIGGGSAHDNAK.A	112.126	94.6038	116.903	11.7399	13.5158	13.0074	7.29951	11.1582	9.68047	10.798	9.1682	10.0438
sp|P10127|ADH4_YEAST	ADH4	Alcohol dehydrogenase 4	0	U	K.EQNSEIVVSIGGGSAHDNAK.A	67.4328	55.4224	76.6399	5.41378	1.79499	3.95984	2.47603	0	0	3.50421	0.0222465	0
sp|P10127|ADH4_YEAST	ADH4	Alcohol dehydrogenase 4	0	U	R.FTIISNEEK.K	814.775	913.73	785.018	2.51277	9.06086	34.0542	28.4118	31.8046	31.7391	42.5778	26.7872	30.7566
sp|P10127|ADH4_YEAST	ADH4	Alcohol dehydrogenase 4	0	U	K.EQVVAIIK.K	162.612	157.439	143.243	11.4673	6.37582	14.7129	9.06671	11.524	9.37974	11.1506	12.8763	10.2079
sp|P10127|ADH4_YEAST	ADH4	Alcohol dehydrogenase 4	0	U	R.FTIISNEEK.K	120.536	97.0553	106.672	19.8844	14.2582	21.8578	5.0188	8.95161	5.96079	8.20806	9.04149	10.5741
sp|P10127|ADH4_YEAST	ADH4	Alcohol dehydrogenase 4	0	U	K.ALIVTDPGIAAIGLSGR.V	127.729	119.765	121.081	0	1.17826	3.16055	0	0	0	0	5.78797	3.78679
sp|P10127|ADH4_YEAST	ADH4	Alcohol dehydrogenase 4	0	U	K.AALPLFAINTTAGTASEM*TR.F	124.983	96.2258	85.2659	0	0	9.46262	7.74622	5.64867	4.79279	4.90143	4.27398	8.11423
sp|P10127|ADH4_YEAST	ADH4	Alcohol dehydrogenase 4	0	U	K.AALPLFAINTTAGTASEM*TR.F	37.065	29.9696	32.1621	5.77868	5.32341	9.59803	9.90818	7.75703	5.4317	15.3363	10.4845	4.31723
sp|P10127|ADH4_YEAST	ADH4	Alcohol dehydrogenase 4	0	U	K.ALHVLNR.T	595.897	588.196	613.033	34.0911	23.4143	38.4126	36.079	36.482	28.5238	34.9619	26.9773	31.9838
sp|P10127|ADH4_YEAST	ADH4	Alcohol dehydrogenase 4	0	U	R.FTIISNEEK.K	1107.6	1142.06	1102.05	15.2268	13.9925	57.6328	46.3569	44.6663	40.7711	41.6143	46.8293	39.3091
sp|P10127|ADH4_YEAST	ADH4	Alcohol dehydrogenase 4	0	U	R.FTIISNEEK.K	1744.44	1755.82	1629.78	24.6405	3.11499	75.2469	65.7468	52.662	48.9699	60.5823	59.6191	48.7092
sp|P10127|ADH4_YEAST	ADH4	Alcohol dehydrogenase 4	0	U	K.GIDLINESLVAAYK.D	61.5697	59.2537	62.1962	10.4196	9.43497	0	2.37871	0.0496915	0	0	0.00908182	6.3183e-05
sp|P10127|ADH4_YEAST	ADH4	Alcohol dehydrogenase 4	0	U	K.AALPLFAINTTAGTASEMTR.F	601.567	579.534	575.825	4.04008	6.03801	18.874	18.3423	15.5703	13.1733	17.4119	11.3854	16.1074
sp|P10127|ADH4_YEAST	ADH4	Alcohol dehydrogenase 4	0	U	K.AIALLATNGGEIGDYEGVNQSK.K	54.0076	54.359	51.4951	0	1.43475	2.21314	0	4.23873	0	5.53454	3.15074	0
sp|P10127|ADH4_YEAST	ADH4	Alcohol dehydrogenase 4	0	U	K.EQVVAIIK.K	351.141	343.645	341.665	4.41592	1.98269	14.0977	11.9977	8.70861	9.87297	10.0845	7.83668	7.46684
sp|P10127|ADH4_YEAST	ADH4	Alcohol dehydrogenase 4	0	U	R.LGEIALHFGASQEDPEETIK.A	66.924	57.9499	55.6149	7.3755	6.1479	5.10285	3.94469	5.09303	4.44642	5.98998	6.37803	3.38524
sp|P10127|ADH4_YEAST	ADH4	Alcohol dehydrogenase 4	0	U	K.AALPLFAINTTAGTASEMTR.F	31.3831	32.0395	27.7947	2.26519	0	3.61182	4.21581	0	0	5.43612	2.81633	3.544
sp|P38113|ADH5_YEAST	ADH5	Alcohol dehydrogenase 5	0	U	K.ATNGGSHGVINVSVSEAAIEASTR.Y	81.5038	84.9167	86.5054	12.673	18.0263	12.0861	16.0544	18.2453	13.2714	0	0	2.81395
sp|P38113|ADH5_YEAST	ADH5	Alcohol dehydrogenase 5	0	U	K.VGDFAGIK.W	99.972	103.663	86.6286	59.8495	66.7808	66.2336	16.6171	18.1558	20.8542	12.3308	8.87433	11.1341
sp|P38113|ADH5_YEAST	ADH5	Alcohol dehydrogenase 5	0	U	R.YVVETSK.-	50.6561	34.4325	47.8097	76.4123	38.6253	57.7263	53.3477	37.6611	66.8403	35.3291	57.5141	87.663
sp|P38113|ADH5_YEAST	ADH5	Alcohol dehydrogenase 5	0	U	K.ATNGGSHGVINVSVSEAAIEASTR.Y	28.8582	27.9597	26.1574	9.83416	7.0157	3.9952	3.18883	8.38168	4.61493	0	0	0.0292471
sp|P38113|ADH5_YEAST	ADH5	Alcohol dehydrogenase 5	0	U	R.YVVETSK.-	365.642	363.555	348.345	272.489	264.708	257.784	143.295	134.245	135.838	66.4574	73.6565	67.9561
sp|P38113|ADH5_YEAST	ADH5	Alcohol dehydrogenase 5	0	U	K.AIVFYETDGK.L	261.932	278.494	278.582	150.078	144.391	157.039	101.569	112.943	101.089	58.1669	52.8362	52.3096
sp|P38113|ADH5_YEAST	ADH5	Alcohol dehydrogenase 5	0	U	K.DVTVPEPKPNEILVHVK.Y	206.105	162.139	166.564	233.602	175.841	184.019	95.3987	78.6088	120.854	64.3804	67.2246	77.8831
sp|P38113|ADH5_YEAST	ADH5	Alcohol dehydrogenase 5	0	U	K.ATNGGSHGVINVSVSEAAIEASTR.Y	38.8803	31.9956	39.7529	10.3831	6.34654	6.38381	9.74401	11.7826	8.88267	3.00422	4.32307	0
sp|P38113|ADH5_YEAST	ADH5	Alcohol dehydrogenase 5	0	U	R.VIGIDGGNAK.R	384.53	421.259	418.176	233.085	276.315	274.658	98.0788	93.0514	83.4296	52.6567	46.7457	43.2537
sp|P38113|ADH5_YEAST	ADH5	Alcohol dehydrogenase 5	0	U	R.VIGIDGGNAK.R	157.312	194.275	184.917	261.419	313.53	295.236	256.593	302.098	229.395	330.243	285.629	288.789
sp|Q04894|ADH6_YEAST	ADH6	NADP-dependent alcohol dehydrogenase 6	0	U	K.M*GADHYIATLEEGDWGEK.Y	41.6221	32.0066	31.923	6.34087	8.63657	6.70511	30.7966	26.4751	30.8966	24.5932	21.0884	21.5481
sp|Q04894|ADH6_YEAST	ADH6	NADP-dependent alcohol dehydrogenase 6	0	U	K.M*GADHYIATLEEGDWGEK.Y	108.713	107.983	101.627	12.6905	16.0218	16.6997	79.5007	82.1565	86.2061	63.0981	64.3052	60.0172
sp|Q04894|ADH6_YEAST	ADH6	NADP-dependent alcohol dehydrogenase 6	0	U	K.VGIVGLGGIGSM*GTLISK.A	75.7504	36.8772	45.5311	9.91662	20.5253	7.87207	30.4702	29.3216	31.9813	21.7757	29.9092	19.9783
sp|Q04894|ADH6_YEAST	ADH6	NADP-dependent alcohol dehydrogenase 6	0	U	K.M*PLVVGHEIVGK.V	318.046	238.907	231.471	64.2165	82.4165	65.4314	168.669	181.734	183.349	143.17	110.362	119.03
sp|Q04894|ADH6_YEAST	ADH6	NADP-dependent alcohol dehydrogenase 6	0	U	K.M*PLVVGHEIVGK.V	289.767	205.653	224.197	64.0954	90.648	66.1196	161.562	162.339	154.245	130.858	124.082	115.898
sp|Q04894|ADH6_YEAST	ADH6	NADP-dependent alcohol dehydrogenase 6	0	U	K.AMGAETYVISR.S	12.7324	11.3383	10.4669	6.58049	3.99141	4.82996	13.501	10.9242	12.59	12.6412	12.3819	15.7244
sp|Q04894|ADH6_YEAST	ADH6	NADP-dependent alcohol dehydrogenase 6	0	U	K.M*GADHYIATLEEGDWGEK.Y	20.9199	25.3961	30.5538	9.63164	9.81498	8.2579	25.749	25.386	25.3871	24.8573	28.3351	25.1231
sp|Q04894|ADH6_YEAST	ADH6	NADP-dependent alcohol dehydrogenase 6	0	U	K.AMGAETYVISR.S	63.6509	52.1132	46.7596	30.4286	25.5855	16.1928	53.3836	37.141	57.4871	35.864	51.3123	65.8632
sp|Q04894|ADH6_YEAST	ADH6	NADP-dependent alcohol dehydrogenase 6	0	U	K.MGADHYIATLEEGDWGEK.Y	39.9738	43.7907	44.4678	16.9619	13.4529	16.3293	47.8424	51.7633	51.6645	40.111	48.3314	44.3199
sp|Q04894|ADH6_YEAST	ADH6	NADP-dependent alcohol dehydrogenase 6	0	U	K.MGADHYIATLEEGDWGEK.Y	49.852	49.8256	58.5	17.2754	21.2077	23.2602	57.7969	65.6946	53.7107	54.0679	53.6864	49.8215
sp|Q04894|ADH6_YEAST	ADH6	NADP-dependent alcohol dehydrogenase 6	0	U	K.VGIVGLGGIGSM*GTLISK.A	70.3498	73.7771	91.7028	32.9205	27.1976	32.2856	89.5628	85.9345	84.9992	71.1151	97.161	80.8088
sp|Q04894|ADH6_YEAST	ADH6	NADP-dependent alcohol dehydrogenase 6	0	U	K.VGIVGLGGIGSMGTLISK.A	796.817	930.346	935.106	307.732	326.724	367.06	946.741	1009.99	935.515	935.917	963.171	919.648
sp|Q04894|ADH6_YEAST	ADH6	NADP-dependent alcohol dehydrogenase 6	0	U	R.FTLVGYDK.E	132.481	143.554	119.956	46.8784	56.7301	69.9725	127.865	135.205	120.141	105.507	105.266	93.3176
sp|Q04894|ADH6_YEAST	ADH6	NADP-dependent alcohol dehydrogenase 6	0	U	R.FTLVGYDK.E	887.357	916.622	936.567	268.533	292.385	338.096	924.093	947.636	919.445	876.26	895.65	901.499
sp|Q04894|ADH6_YEAST	ADH6	NADP-dependent alcohol dehydrogenase 6	0	U	R.FTLVGYDK.E	206.829	207.039	224.982	79.2964	106.597	107.49	260.818	205.947	201.956	183.105	208.089	181.674
sp|Q04894|ADH6_YEAST	ADH6	NADP-dependent alcohol dehydrogenase 6	0	U	K.MPLVVGHEIVGK.V	46.5396	58.4217	51.5118	20.6116	26.1086	26.3462	48.0012	51.3252	37.6292	45.4674	45.3957	54.1753
sp|Q04894|ADH6_YEAST	ADH6	NADP-dependent alcohol dehydrogenase 6	0	U	K.FVTTYSQPYEDGYVSQGGYANYVR.V	12.893	11.4779	11.7137	10.6845	14.2153	12.9757	7.27938	10.3222	7.68785	5.39373	8.56745	6.80151
sp|Q04894|ADH6_YEAST	ADH6	NADP-dependent alcohol dehydrogenase 6	0	U	K.M*PLVVGHEIVGK.V	115.257	111.903	113.554	83.1768	102.292	90.1736	102.951	114.616	103.606	104.332	112.016	93.9233
sp|Q04894|ADH6_YEAST	ADH6	NADP-dependent alcohol dehydrogenase 6	0	U	K.MPLVVGHEIVGK.V	187.376	192.712	200.584	91.627	87.387	91.4978	169.865	163.747	164.703	154.535	146.65	150.301
sp|Q04894|ADH6_YEAST	ADH6	NADP-dependent alcohol dehydrogenase 6	0	U	K.AMGAETYVISR.S	56.18	44.8633	42.2043	29.6368	28.1575	24.445	47.9283	45.9963	59.9102	40.7377	49.4067	63.6911
sp|Q04894|ADH6_YEAST	ADH6	NADP-dependent alcohol dehydrogenase 6	0	U	K.MGADHYIATLEEGDWGEK.Y	25.9243	36.5461	34.1128	12.4335	18.631	13.4397	26.5425	32.0865	28.6965	30.1869	24.1262	27.9097
sp|Q04894|ADH6_YEAST	ADH6	NADP-dependent alcohol dehydrogenase 6	0	U	K.MGADHYIATLEEGDWGEK.Y	47.8651	57.329	52.4927	15.8091	28.2247	27.9413	54.3173	56.1935	56.084	51.7757	48.197	55.0073
sp|Q04894|ADH6_YEAST	ADH6	NADP-dependent alcohol dehydrogenase 6	0	U	K.FEGIAIQSHEDWK.N	36.6686	54.6638	43.2357	20.6421	32.6516	34.1225	50.1781	70.1787	50.5088	65.6823	52.8743	60.2825
sp|Q04894|ADH6_YEAST	ADH6	NADP-dependent alcohol dehydrogenase 6	0	U	R.FTLVGYDK.E	211.078	200.225	246.45	95.1124	109.882	115.979	245.434	192.093	202.824	185.886	184.631	166.066
sp|Q04894|ADH6_YEAST	ADH6	NADP-dependent alcohol dehydrogenase 6	0	U	K.MPLVVGHEIVGK.V	51.8608	81.2068	55.9616	22.8649	18.8695	24.4849	53.1849	60.5685	46.0819	38.9123	52.8229	43.9672
sp|Q04894|ADH6_YEAST	ADH6	NADP-dependent alcohol dehydrogenase 6	0	U	K.M*GADHYIATLEEGDWGEK.Y	20.575	29.612	32.0343	7.32338	11.0374	13.4095	33.6482	24.9708	21.1447	27.6382	20.4274	28.0735
sp|Q04894|ADH6_YEAST	ADH6	NADP-dependent alcohol dehydrogenase 6	0	U	K.VGIVGLGGIGSM*GTLISK.A	15.7726	14.4863	19.5673	5.03397	7.23409	8.67158	19.0609	14.7178	16.9286	11.6503	13.2101	15.141
sp|Q04894|ADH6_YEAST	ADH6	NADP-dependent alcohol dehydrogenase 6	0	U	R.FTLVGYDK.E	682.185	681.37	1186.18	316.812	528.584	528.885	1436.08	786.402	686.455	642.222	811.758	642.809
sp|Q04894|ADH6_YEAST	ADH6	NADP-dependent alcohol dehydrogenase 6	0	U	R.FTLVGYDK.E	322.493	323.83	350.236	105.548	116.007	122.201	311.731	316.89	340.378	313.24	317.057	323.112
sp|Q04894|ADH6_YEAST	ADH6	NADP-dependent alcohol dehydrogenase 6	0	U	K.MPLVVGHEIVGK.V	70.5837	80.4423	87.5889	30.5352	27.4908	25.2264	82.8619	78.8619	73.2391	60.2077	74.8371	72.313
sp|Q04894|ADH6_YEAST	ADH6	NADP-dependent alcohol dehydrogenase 6	0	U	K.M*PLVVGHEIVGK.V	298.969	242.397	227.439	48.2185	74.1455	57.846	168.381	181.095	148.775	141.044	137.232	123.402
sp|Q04894|ADH6_YEAST	ADH6	NADP-dependent alcohol dehydrogenase 6	0	U	K.IWVETLPVGEAGVHEAFER.M	22.0262	23.0003	20.4836	5.94928	7.20909	9.67426	22.203	21.6401	20.5698	16.1976	18.7966	14.4052
sp|Q03677|MTND_YEAST	ADI1	1,2-dihydroxy-3-keto-5-methylthiopentene dioxygenase	0	U	K.DYIALINQY.-	70.9495	72.3555	67.3685	51.5034	63.0071	56.002	93.1147	86.1414	91.8891	43.751	42.8204	50.4945
sp|Q03677|MTND_YEAST	ADI1	1,2-dihydroxy-3-keto-5-methylthiopentene dioxygenase	0	U	R.SNQADSLPVR.K	77.0526	82.8211	76.6089	56.3762	63.4009	57.3067	56.0695	63.9905	68.0505	22.0888	31.1683	29.9034
sp|Q03677|MTND_YEAST	ADI1	1,2-dihydroxy-3-keto-5-methylthiopentene dioxygenase	0	U	K.LATFYQEHLHEDEEIR.Y	98.5134	91.2265	100.944	94.8981	106.98	90.1707	121.252	141.005	131.791	72.8677	72.5801	66.2697
sp|Q03677|MTND_YEAST	ADI1	1,2-dihydroxy-3-keto-5-methylthiopentene dioxygenase	0	U	K.DYIALINQY.-	17.8166	24.141	18.2019	18.0707	13.4642	14.8251	21.6682	28.5496	30.7276	11.1357	11.0111	13.1996
sp|Q03677|MTND_YEAST	ADI1	1,2-dihydroxy-3-keto-5-methylthiopentene dioxygenase	0	U	R.DASTPENWIR.C	69.0252	82.3134	90.661	94.4496	91.7816	85.0188	120.957	123.248	109.923	65.6147	63.3019	77.4539
sp|Q03677|MTND_YEAST	ADI1	1,2-dihydroxy-3-keto-5-methylthiopentene dioxygenase	0	U	R.DASTPENWIR.C	21.1048	18.0326	14.0605	18.1197	18.8332	16.953	22.747	26.5064	21.4465	10.0489	11.742	13.3603
sp|P07170|KAD2_YEAST	ADK1	Adenylate kinase	0	U	R.M*VLIGPPGAGK.G	178.787	178.347	179.416	136.085	126.642	146.658	301.365	335.81	322.245	205.235	204.364	197.636
sp|P07170|KAD2_YEAST	ADK1	Adenylate kinase	0	U	R.M*VLIGPPGAGK.G	38.7976	36.5731	46.2213	31.0365	31.7916	27.5071	75.3307	81.7205	77.5055	45.7353	52.6818	51.3472
sp|P07170|KAD2_YEAST	ADK1	Adenylate kinase	0	U	K.EQGTPLEK.A	58.28	57.7677	67.354	51.5453	60.8708	53.1904	126.354	131.24	149.347	85.3198	89.4826	77.0104
sp|P07170|KAD2_YEAST	ADK1	Adenylate kinase	0	U	R.FHAAHLATGDMLR.S	29.7084	27.142	26.4801	19.9752	20.6355	20.49	43.5892	44.3746	53.0377	30.8999	26.372	28.1694
sp|P07170|KAD2_YEAST	ADK1	Adenylate kinase	0	U	R.MVLIGPPGAGK.G	58.1426	58.4428	63.6847	43.5639	50.0096	41.6189	96.5756	116.798	103.022	61.2151	64.2605	58.5836
sp|P07170|KAD2_YEAST	ADK1	Adenylate kinase	0	U	K.EQGTPLEK.A	29.175	38.1475	37.1729	30.838	37.9409	31.5397	74.8467	71.1671	71.4414	72.4198	72.3948	58.0588
sp|P07170|KAD2_YEAST	ADK1	Adenylate kinase	0	U	R.M*VLIGPPGAGK.G	100.998	60.1369	60.809	22.0301	35.6146	13.208	66.7666	79.3855	70.7677	30.7235	27.2061	26.2419
sp|P07170|KAD2_YEAST	ADK1	Adenylate kinase	0	U	K.DDVTGEALVQR.S	75.7538	90.544	80.5374	65.1387	71.4853	61.2323	133.796	126.462	125.519	59.5423	72.4978	76.1491
sp|P07170|KAD2_YEAST	ADK1	Adenylate kinase	0	U	R.FHAAHLATGDM*LR.S	88.366	47.1604	54.0111	23.409	42.7456	12.4956	62.5259	55.6586	69.2181	33.8467	33.6796	26.1953
sp|P07170|KAD2_YEAST	ADK1	Adenylate kinase	0	U	R.TIPQAEK.L	514.492	497.041	464.359	448.81	461.328	440.267	1055.27	1062.38	1096.8	638.651	617.929	618.187
sp|P07170|KAD2_YEAST	ADK1	Adenylate kinase	0	U	K.GTQLGLEAK.K	909.254	863.272	882.795	703.458	691.849	627.196	1582.8	1585.93	1587.55	891.981	920.274	858.521
sp|P07170|KAD2_YEAST	ADK1	Adenylate kinase	0	U	K.GTQLGLEAK.K	62.0952	54.6433	63.5969	44.5158	51.6099	44.6256	110.293	103.6	109.803	58.3979	61.5116	59.7091
sp|P07170|KAD2_YEAST	ADK1	Adenylate kinase	0	U	K.VDDELLVAR.I	20.2979	24.7784	21.3414	22.1819	25.6861	20.7355	46.6764	52.4721	51.9247	23.3223	28.9286	28.8689
sp|P07170|KAD2_YEAST	ADK1	Adenylate kinase	0	U	K.DDVTGEALVQR.S	219.015	242.865	229.553	160.784	197.005	174.944	373.958	356.026	374.855	199.087	205.766	203.876
sp|P07170|KAD2_YEAST	ADK1	Adenylate kinase	0	U	K.DDVTGEALVQR.S	97.9323	104.308	95.9408	68.848	77.0793	86.0637	156.544	174.044	151.719	89.5111	93.928	92.1923
sp|P07170|KAD2_YEAST	ADK1	Adenylate kinase	0	U	R.LIHPASGR.S	605.711	521.598	554.172	583.089	528.966	523.332	890.75	896.134	967.232	515.64	509.688	596.827
sp|P07170|KAD2_YEAST	ADK1	Adenylate kinase	0	U	R.MVLIGPPGAGK.G	87.7317	84.7655	99.4797	67.0967	69.9032	62.4614	165.04	161.371	172.421	90.6789	100.635	109.202
sp|P07170|KAD2_YEAST	ADK1	Adenylate kinase	0	U	K.NGFILDGFPR.T	51.4921	41.8539	36.094	44.083	48.8623	40.9712	93.4999	90.0709	74.6446	44.4005	62.4199	72.5551
sp|P07170|KAD2_YEAST	ADK1	Adenylate kinase	0	U	K.NGFILDGFPR.T	460.466	383.009	426.043	396.59	352.325	386.411	880.639	882.641	806.56	428.621	497.76	612.063
sp|P07170|KAD2_YEAST	ADK1	Adenylate kinase	0	U	K.IM*DQGGLVSDDIM*VNM*IK.D	202.629	13.5081	11.5639	8.21152	141.686	15.7598	18.4148	24.0954	19.8236	12.7426	18.0668	16.451
sp|P07170|KAD2_YEAST	ADK1	Adenylate kinase	0	U	R.M*VLIGPPGAGK.G	633.644	407.433	404.122	169.741	308.444	215.008	466.004	451.919	438.063	239.798	242.602	225.07
sp|P07170|KAD2_YEAST	ADK1	Adenylate kinase	0	U	K.EDM*KDDVTGEALVQR.S	109.138	39.1143	33.9836	26.5862	38.5621	14.7028	40.9516	41.8585	76.8342	23.7846	23.2032	34.7567
sp|P07170|KAD2_YEAST	ADK1	Adenylate kinase	0	U	R.FHAAHLATGDM*LR.S	308.328	150.74	173.039	58.7829	126.596	54.3647	202.081	218.926	205.476	113.515	97.8812	98.5099
sp|P07170|KAD2_YEAST	ADK1	Adenylate kinase	0	U	K.GTQAPNLQER.F	35.8338	30.2993	29.8541	27.7715	27.001	27.7981	58.1434	59.2709	58.8339	39.0724	40.2239	40.9502
sp|P07170|KAD2_YEAST	ADK1	Adenylate kinase	0	U	R.LAAYHAQTEPIVDFYK.K	200.735	158.415	166.265	135.671	146.597	130.746	345.847	343.534	352.657	207.682	214.919	215.219
sp|P07170|KAD2_YEAST	ADK1	Adenylate kinase	0	U	R.MVLIGPPGAGK.G	213.445	214.455	221.675	195.271	188.657	189.867	414.897	375.868	391.648	239.712	232.189	250.317
sp|P07170|KAD2_YEAST	ADK1	Adenylate kinase	0	U	K.GTQLGLEAK.K	307.196	292.377	311.746	259.708	241.192	228.967	540.492	522.97	517.839	323.702	307.229	309.752
sp|P07170|KAD2_YEAST	ADK1	Adenylate kinase	0	U	R.LIHPASGR.S	144.497	143.685	154.053	138.261	134.421	123.58	223.07	244.003	225.202	120.152	126.17	134.238
sp|P07170|KAD2_YEAST	ADK1	Adenylate kinase	0	U	R.FHAAHLATGDMLR.S	209.29	205.49	199.352	140.199	159.406	155.502	409.889	430.673	437.551	224.403	226.611	248.171
sp|P07170|KAD2_YEAST	ADK1	Adenylate kinase	0	U	R.M*VLIGPPGAGK.G	204.154	243.322	205.032	167.904	148.187	148.246	421.35	443.122	392.662	231.519	239.224	236.922
sp|P26364|KAD3_YEAST	ADK2	GTP:AMP phosphotransferase, mitochondrial	0	U	K.VPGLDDITGEPLTK.R	17.7369	19.2373	18.9786	40.812	42.6084	37.1698	36.0264	31.1586	35.2566	45.3226	45.9998	41.9909
sp|P26364|KAD3_YEAST	ADK2	GTP:AMP phosphotransferase, mitochondrial	0	U	R.LLLLGAPGSGK.G	2.92033	6.4947	4.75494	26.5452	26.9443	32.5736	29.9699	25.0856	25.9118	45.4868	42.4635	35.6558
sp|P47143|ADK_YEAST	ADO1	Adenosine kinase	0	U	K.ENDAILVDAK.S	35.5142	41.4253	41.8211	47.7042	55.9763	52.1846	68.3291	60.5451	55.8605	76.7539	62.7395	65.3692
sp|P47143|ADK_YEAST	ADO1	Adenosine kinase	0	U	K.ENDAILVDAK.S	274.855	281.074	297.692	403.781	420.354	451.293	529.173	567.184	498.321	583.184	567.309	585.06
sp|P47143|ADK_YEAST	ADO1	Adenosine kinase	0	U	K.ENDAILVDAK.S	7.22991	7.83324	6.21024	12.7775	8.9486	6.66372	10.6296	11.95	11.7529	8.08688	14.4003	10.78
sp|P47143|ADK_YEAST	ADO1	Adenosine kinase	0	U	R.GAAYVLGAGQVVYFGSVGK.D	52.613	59.8677	63.0493	58.3212	61.0763	67.2632	83.2169	81.8404	74.2898	80.6897	91.8842	77.472
sp|P47143|ADK_YEAST	ADO1	Adenosine kinase	0	U	K.IVDTNGAGDAFAGGFM*AGLTK.G	29.9433	29.1655	30.197	25.3175	24.6523	19.8719	48.149	38.6367	45.2813	42.6926	32.014	39.9674
sp|P47143|ADK_YEAST	ADO1	Adenosine kinase	0	U	K.IVDTNGAGDAFAGGFM*AGLTK.G	70.9081	58.7961	56.6546	33.3019	39.9621	40.4359	94.2746	104.173	92.1807	68.6002	67.6628	79.6109
sp|P47143|ADK_YEAST	ADO1	Adenosine kinase	0	U	R.SLVTDLGAANFFTPDHLDK.H	18.4298	17.6657	23.4679	18.0037	23.6345	25.1407	25.7903	16.8747	14.5278	20.5339	15.1378	17.9062
sp|P47143|ADK_YEAST	ADO1	Adenosine kinase	0	U	K.LVAGGAAQNTAR.G	55.6458	72.2833	49.6778	67.8067	71.0672	68.2696	87.3722	102.865	67.2152	97.1047	89.6442	96.4644
sp|P47143|ADK_YEAST	ADO1	Adenosine kinase	0	U	K.TVIFTHGVEPTVVVSSK.G	19.3254	19.3809	16.788	27.0446	27.2173	18.871	32.0381	24.6271	36.3618	39.7546	28.3735	26.2612
sp|P47143|ADK_YEAST	ADO1	Adenosine kinase	0	U	K.TVIFTHGVEPTVVVSSK.G	205.134	191.789	198.732	261.921	274.926	274.851	344.305	349.762	355.979	367.58	379.518	363.815
sp|P47143|ADK_YEAST	ADO1	Adenosine kinase	0	U	K.MAIFDELLQMPETK.L	318.412	317.125	354.59	459.395	486.734	451.539	565.3	582.234	631.292	633.729	677.134	643.617
sp|P47143|ADK_YEAST	ADO1	Adenosine kinase	0	U	K.TVIFTHGVEPTVVVSSK.G	14.5604	12.2823	12.1488	14.2345	20.1731	16.5514	22.3161	22.9598	22.1002	18.9988	24.5639	20.2556
sp|P47143|ADK_YEAST	ADO1	Adenosine kinase	0	U	K.TVIFTHGVEPTVVVSSK.G	39.9847	40.9936	27.2916	55.2355	53.6491	48.4084	56.6913	74.1125	67.987	67.2569	64.5508	71.0215
sp|P47143|ADK_YEAST	ADO1	Adenosine kinase	0	U	K.IVDTNGAGDAFAGGFMAGLTK.G	12.2458	8.14666	15.8436	14.1548	16.6598	14.8458	16.3339	24.1137	21.439	18.4037	17.9474	23.2977
sp|P47143|ADK_YEAST	ADO1	Adenosine kinase	0	U	K.SMYQVQNDIGTGK.C	50.7923	43.7394	48.4982	81.499	74.5388	89.518	68.7234	73.7762	90.176	83.3012	79.9621	80.1256
sp|P47143|ADK_YEAST	ADO1	Adenosine kinase	0	U	K.TVIFTHGVEPTVVVSSK.G	77.0443	85.1533	70.8882	100.484	106.985	104.744	131.301	144.451	130.249	122.838	139.583	140.089
sp|P47143|ADK_YEAST	ADO1	Adenosine kinase	0	U	R.GAAYVLGAGQVVYFGSVGK.D	30.4794	30.8259	27.7873	45.1351	37.7998	35.4985	53.742	43.2521	47.8144	56.6248	52.975	60.4
sp|P47143|ADK_YEAST	ADO1	Adenosine kinase	0	U	R.SLVTDLGAANFFTPDHLDK.H	13.4538	9.90352	11.8986	11.2169	9.34656	13.921	20.9571	14.5744	14.8028	15.5853	20.0411	17.1929
sp|P47143|ADK_YEAST	ADO1	Adenosine kinase	0	U	R.SLVTDLGAANFFTPDHLDK.H	31.3309	29.895	35.0501	27.8346	44.2758	52.1541	44.8551	43.6961	36.7497	34.538	45.0776	49.0793
sp|P47143|ADK_YEAST	ADO1	Adenosine kinase	0	U	K.IVDTNGAGDAFAGGFMAGLTK.G	15.7412	19.9853	21.6376	28.953	26.0927	27.8544	35.8474	36.3819	30.6428	29.2299	36.2497	34.8498
sp|P47143|ADK_YEAST	ADO1	Adenosine kinase	0	U	K.MAIFDELLQMPETK.L	552.932	576.631	592.763	808.357	807.17	887.43	1092.76	1071.6	1053.73	1192.05	1173.04	1146.24
sp|P47143|ADK_YEAST	ADO1	Adenosine kinase	0	U	K.IVDTNGAGDAFAGGFMAGLTK.G	7.02671	8.24096	6.13269	10.7619	9.90339	9.41357	12.2467	11.7052	11.3601	14.6163	12.0484	12.5659
sp|P47143|ADK_YEAST	ADO1	Adenosine kinase	0	U	R.GAAYVLGAGQVVYFGSVGK.D	19.0807	20.5977	19.1089	23.3012	23.3894	24.9481	25.6513	30.8082	25.8187	29.4539	29.921	40.244
sp|P47143|ADK_YEAST	ADO1	Adenosine kinase	0	U	K.ENDAILVDAK.S	87.8795	89.7959	91.4178	108.778	116.853	119.596	145.157	139.985	131.952	146.184	167.384	137.857
sp|P47143|ADK_YEAST	ADO1	Adenosine kinase	0	U	R.GAAYVLGAGQVVYFGSVGK.D	8.08797	7.64542	8.75279	9.27627	10.4181	10.8282	12.3014	14.7455	9.71994	5.57689	13.9205	12.6269
sp|P47143|ADK_YEAST	ADO1	Adenosine kinase	0	U	K.LVAGGAAQNTAR.G	136.154	137.285	112.605	168.972	164.399	149.824	222.061	219.226	214.939	213.05	232.513	237.296
sp|P47143|ADK_YEAST	ADO1	Adenosine kinase	0	U	K.SM*YQVQNDIGTGK.C	22.6126	24.5006	19.9635	36.4029	39.6265	36.5034	34.0264	26.6609	32.3182	41.7272	37.7951	36.8489
sp|P47143|ADK_YEAST	ADO1	Adenosine kinase	0	U	K.ENDAILVDAK.S	97.23	79.576	97.9134	130.178	130.45	114.965	154.483	142.28	154.889	147.069	164.744	164.277
sp|P47143|ADK_YEAST	ADO1	Adenosine kinase	0	U	K.ENDAILVDAK.S	14.1134	15.6875	14.9157	20.9113	21.5873	17.2331	22.6684	26.9315	17.5048	21.7937	27.5211	27.7827
sp|P47143|ADK_YEAST	ADO1	Adenosine kinase	0	U	K.HWDLVEAAK.L	8.33454	5.03951	9.64226	10.5755	12.5401	12.8488	16.0787	10.3438	12.2791	16.5292	15.1605	19.1634
sp|P47143|ADK_YEAST	ADO1	Adenosine kinase	0	U	R.GAAYVLGAGQVVYFGSVGK.D	10.6253	8.64897	10.1828	13.8591	7.16526	11.9454	15.3279	15.9223	18.5117	15.5425	15.9831	21.0132
sp|P47143|ADK_YEAST	ADO1	Adenosine kinase	0	U	R.GAAYVLGAGQVVYFGSVGK.D	3.74557	5.41232	10.2586	7.42678	10.1282	10.2934	9.3309	9.21619	11.7124	11.4009	11.5469	9.83057
sp|P25371|ADP1_YEAST	ADP1	Probable ATP-dependent permease	0	U	R.SNIFYLFDK.L	27.8575	32.7051	28.7125	27.5426	25.5168	23.2521	7.21292	9.35703	10.9929	13.6849	15.9142	9.12743
sp|P25371|ADP1_YEAST	ADP1	Probable ATP-dependent permease	0	U	K.ALSFEAK.K	73.4675	83.3677	81.3063	66.4553	73.1994	76.4045	24.3071	24.7766	25.8736	37.7422	32.4066	40.3466
sp|P25371|ADP1_YEAST	ADP1	Probable ATP-dependent permease	0	U	R.IIGNEFDR.G	54.1217	49.5266	58.4817	49.0315	51.7263	48.1169	18.1781	14.8392	16.9918	29.2082	25.3419	24.7411
sp|P25371|ADP1_YEAST	ADP1	Probable ATP-dependent permease	0	U	K.NITNVAFK.Y	75.993	94.9029	89.8866	49.6718	60.4455	73.7928	27.2176	34.2628	27.189	39.2521	49.1786	35.142
sp|P25371|ADP1_YEAST	ADP1	Probable ATP-dependent permease	0	U	R.GATEIDLNTK.L	411.84	421.606	457.702	302.966	298.21	307.898	175.755	169.297	168.769	264.555	285.828	261.561
sp|P25371|ADP1_YEAST	ADP1	Probable ATP-dependent permease	0	U	R.SNNYYSPLAYYISK.I	253.63	196.4	216.615	244.903	172.615	206.926	84.9465	58.3853	92.8637	92.6065	105.244	151.879
sp|P25371|ADP1_YEAST	ADP1	Probable ATP-dependent permease	0	U	K.WIVVEQK.-	115.053	136.217	134.964	59.4981	82.407	106.469	66.3896	63.3491	46.503	86.4453	86.2062	85.6257
sp|P25371|ADP1_YEAST	ADP1	Probable ATP-dependent permease	0	U	K.TTLLDILAM*K.R	29.1185	20.4717	20.5735	4.5963	8.8983	9.45257	4.13147	6.14945	7.10982	10.7662	4.5625	3.81317
sp|P25371|ADP1_YEAST	ADP1	Probable ATP-dependent permease	0	U	R.SNIFYLFDK.L	23.4531	17.831	19.9949	12.0737	12.5049	10.8144	8.98913	7.83802	6.79953	9.78624	6.16033	5.67649
sp|P25371|ADP1_YEAST	ADP1	Probable ATP-dependent permease	0	U	K.PGQILAIMGGSGAGK.T	47.4032	41.3747	58.676	40.3325	50.3454	58.0163	37.3803	26.7861	22.9693	51.8407	45.6993	40.3794
sp|P25371|ADP1_YEAST	ADP1	Probable ATP-dependent permease	0	U	K.TTLLDILAM*K.R	20.4424	22.694	20.8175	16.422	23.6426	20.2782	11.8911	14.9218	14.2792	22.7726	16.6647	14.3289
sp|P25371|ADP1_YEAST	ADP1	Probable ATP-dependent permease	0	U	K.NITNVAFK.Y	251.556	285.591	293.094	188.095	207.139	240.4	90.0007	78.7154	80.6374	127.481	143.234	133.722
sp|P25371|ADP1_YEAST	ADP1	Probable ATP-dependent permease	0	U	R.SNIFYLFDK.L	35.159	30.459	27.1187	24.5472	20.8458	21.0549	7.66219	12.3756	10.0685	11.3998	13.7386	15.7609
sp|P25371|ADP1_YEAST	ADP1	Probable ATP-dependent permease	0	U	R.NGLGSSK.S	48.7448	58.7613	57.1583	42.0556	40.6322	41.9247	19.9777	14.397	21.5046	23.7444	27.8499	26.8215
sp|P07248|ADR1_YEAST	ADR1	Regulatory protein ADR1	0	U	K.IHSGNLGETISHTK.K	319.462	331.726	296.68	425.884	394.526	420.158	46.7389	45.1706	65.8103	89.8763	94.6652	101.568
sp|P07248|ADR1_YEAST	ADR1	Regulatory protein ADR1	0	U	K.DVETIYIPDNESK.W	15.9395	14.9633	18.2455	22.8476	24.2021	25.0742	2.76246	3.7455	4.90082	7.08813	5.71975	4.50821
sp|P07248|ADR1_YEAST	ADR1	Regulatory protein ADR1	0	U	K.LPESANNYTYSSGSPTR.A	82.9582	81.8752	81.5498	84.6079	78.4053	79.3111	27.7769	19.1309	25.759	46.3675	45.2822	46.0499
sp|P07248|ADR1_YEAST	ADR1	Regulatory protein ADR1	0	U	K.NASFNDADLLSSSYWIK.A	160.872	167.781	157.052	249.19	272.983	248.528	62.9496	60.8139	65.3335	121.255	122.713	121.539
sp|P07248|ADR1_YEAST	ADR1	Regulatory protein ADR1	0	U	K.IITTNNNMNSK.I	46.6829	37.8726	43.7903	45.109	50.5262	50.6898	8.04055	9.34332	5.00003	11.0517	14.2674	13.1907
sp|P07248|ADR1_YEAST	ADR1	Regulatory protein ADR1	0	U	R.YTNEDGYDDAENAQLFDR.L	168.294	160.292	179.755	199.194	204.241	188.433	29.1515	21.2329	35.5027	46.5869	38.8975	40.8606
sp|P07248|ADR1_YEAST	ADR1	Regulatory protein ADR1	0	U	R.ALPASTVNNNQPSHSIESK.L	295.992	257.683	311.679	387.688	349.397	329.392	85.4728	72.3034	86.2471	133.524	125.676	123.383
sp|P07248|ADR1_YEAST	ADR1	Regulatory protein ADR1	0	U	K.EYDYEHYQILSISK.I	59.9851	66.1423	54.1252	71.8087	80.523	73.2233	8.70333	11.9349	13.5021	17.155	18.3723	26.3755
sp|P07248|ADR1_YEAST	ADR1	Regulatory protein ADR1	0	U	K.FQTPTYGTPDNGNFLNR.T	51.3119	44.225	45.4868	57.0739	53.6508	57.4964	8.08533	5.87226	8.46672	16.3661	10.8384	10.323
sp|P07248|ADR1_YEAST	ADR1	Regulatory protein ADR1	0	U	K.LIVPDFK.S	139.571	156.4	156.317	198.211	207.135	198.363	64.7686	54.1983	48.763	93.1634	86.3817	96.1308
sp|P07248|ADR1_YEAST	ADR1	Regulatory protein ADR1	0	U	K.MASDFHTLENHLK.G	168.145	155.61	179.765	244.715	215.371	196.744	56.9773	48.8417	55.1576	89.1523	104.861	98.062
sp|P07248|ADR1_YEAST	ADR1	Regulatory protein ADR1	0	U	R.SSSWTVAIDNNSNNNK.V	41.0038	44.874	36.2655	46.8366	46.8671	37.186	13.322	12.88	19.4844	20.6786	21.1058	26.5526
sp|P07248|ADR1_YEAST	ADR1	Regulatory protein ADR1	0	U	R.SDSSGSTMNLDYK.L	222.351	236.203	214.919	256.164	275.116	255.697	62.7148	60.6362	53.1206	156.704	146.268	150.617
sp|P07248|ADR1_YEAST	ADR1	Regulatory protein ADR1	0	U	R.NEFSFDNGDR.A	22.5298	20.5041	24.6187	30.7926	34.0327	23.7216	5.1107	0	7.77742	9.11878	8.56681	11.9077
sp|P07248|ADR1_YEAST	ADR1	Regulatory protein ADR1	0	U	K.IYDSFLNSVR.L	35.1704	32.5222	34.5101	37.7345	37.9008	34.6775	14.838	16.3094	12.4575	13.9136	8.76707	13.9679
sp|P07248|ADR1_YEAST	ADR1	Regulatory protein ADR1	0	U	K.IYDSFLNSVR.L	83.7743	97.3034	95.6762	107.322	102.597	112.197	29.5902	25.1077	26.0895	35.8568	33.5344	36.5565
sp|P07248|ADR1_YEAST	ADR1	Regulatory protein ADR1	0	U	K.SQTIELYEMSR.R	22.1588	24.9106	27.9172	33.3282	31.7485	25.7142	5.03149	7.28362	6.49088	11.4939	9.89125	11.9939
sp|P07248|ADR1_YEAST	ADR1	Regulatory protein ADR1	0	U	R.SLDTSSYGNDNMAATNK.N	52.3621	54.3712	62.0742	69.5268	64.7029	62.9029	16.3017	14.1996	14.7704	23.2889	22.1999	24.1203
sp|P07248|ADR1_YEAST	ADR1	Regulatory protein ADR1	0	U	K.EYDYEHYQILSISK.I	253.803	239.534	270.294	318.783	341.538	316.674	54.5369	50.3685	45.7683	84.8015	93.9311	95.5719
sp|P07248|ADR1_YEAST	ADR1	Regulatory protein ADR1	0	U	K.EYDYEHYQILSISK.I	336.17	330.76	358.126	396.582	414.727	412.081	59.723	60.4897	67.9659	132.275	127.903	129.34
sp|P07248|ADR1_YEAST	ADR1	Regulatory protein ADR1	0	U	R.ENSNTFSVIQR.T	13.6583	11.3287	14.294	18.9689	12.5355	15.7648	12.4425	9.96167	13.9638	14.2185	11.1439	11.7301
sp|P07248|ADR1_YEAST	ADR1	Regulatory protein ADR1	0	U	K.IDSSLMK.R	202.103	221.788	246.867	243.124	235.3	269.509	50.621	42.1058	51.1076	86.5978	80.3252	75.0852
sp|P07248|ADR1_YEAST	ADR1	Regulatory protein ADR1	0	U	K.QEIEMETDDSPILLMSSSASR.E	7.75073	8.22967	7.59058	12.6654	12.9738	12.8847	7.73088	4.71456	5.29207	9.71155	9.00506	13.4023
sp|P07248|ADR1_YEAST	ADR1	Regulatory protein ADR1	0	U	K.IHSGNLGETISHTK.K	36.4388	26.9018	29.5732	48.4465	45.2012	41.1162	4.85703	6.96783	5.36298	13.6969	8.49709	10.0729
sp|P25613|ADY2_YEAST	ADY2	Accumulation of dyads protein 2	0	U	K.SDLYQAFGGTLNPGLAPAPVHK.F	69.3161	72.2603	75.7898	3.95756	0.737035	9.83723	10.0151	7.56014	4.96475	4.81141	3.58269	3.43927
sp|P25613|ADY2_YEAST	ADY2	Accumulation of dyads protein 2	0	U	K.IYTGGDNNEYIYIGR.Q	47.7778	48.8701	40.2498	1.52758	1.8226	0	0	0.0175006	0.0100952	0	0	2.98553e-05
sp|P25613|ADY2_YEAST	ADY2	Accumulation of dyads protein 2	0	U	K.IYTGGDNNEYIYIGR.Q	132.275	136.033	131.948	3.76356	0	7.46677	11.2721	10.6085	9.34594	0	0	0.0371643
sp|P25613|ADY2_YEAST	ADY2	Accumulation of dyads protein 2	0	U	K.SDLYQAFGGTLNPGLAPAPVHK.F	88.0896	98.304	96.0961	3.4746	9.18013	7.46387	21.8623	16.5706	16.8575	13.5104	10.7396	11.4463
sp|P25613|ADY2_YEAST	ADY2	Accumulation of dyads protein 2	0	U	K.SDLYQAFGGTLNPGLAPAPVHK.F	79.4598	111.062	100.822	4.46672	2.07642	7.11543	11.2093	9.21949	11.5009	4.58733	3.18184	5.27542
sp|P25613|ADY2_YEAST	ADY2	Accumulation of dyads protein 2	0	U	K.SDLYQAFGGTLNPGLAPAPVHK.F	510.363	609.73	581.848	17.0593	17.6776	31.4977	50.1267	43.516	47.9487	6.23389	9.54162	4.43113
sp|P25613|ADY2_YEAST	ADY2	Accumulation of dyads protein 2	0	U	K.SDLYQAFGGTLNPGLAPAPVHK.F	426.645	496.226	482.852	20.9804	29.703	28.6164	47.8773	49.3421	50.9766	11.8183	8.97945	12.4428
sp|P25613|ADY2_YEAST	ADY2	Accumulation of dyads protein 2	0	U	K.SDLYQAFGGTLNPGLAPAPVHK.F	546.39	614.991	623.509	22.7513	14.4007	24.9928	42.2059	49.7103	45.2375	0.945046	0	0
sp|P25613|ADY2_YEAST	ADY2	Accumulation of dyads protein 2	0	U	K.IYTGGDNNEYIYIGR.Q	27.9069	31.8331	40.7619	0	1.3654	0	2.1248	0.00670057	2.63023	0	0	1.49358e-05
sp|P25613|ADY2_YEAST	ADY2	Accumulation of dyads protein 2	0	U	K.SDLYQAFGGTLNPGLAPAPVHK.F	32.7846	32.5096	35.9661	0	3.07685	0.0266921	4.94061	3.97652	5.1789	0	0	0.013708
sp|P25613|ADY2_YEAST	ADY2	Accumulation of dyads protein 2	0	U	K.SDLYQAFGGTLNPGLAPAPVHK.F	433.51	512.363	507.001	38.0779	45.9009	47.5696	53.914	52.012	46.1483	22.4393	19.7095	15.4117
sp|Q05955|ADY4_YEAST	ADY4	Accumulates dyads protein 4	0	U	R.IYQTFTDPSN.-	11.4042	13.1566	10.6535	7.12574	14.1272	7.39226	10.35	11.4193	3.69832	6.99649	9.55895	6.36731
sp|P32493|AEP1_YEAST	AEP1	ATPase expression protein 1, mitochondrial	0	U	R.AVDSTLPIFIK.K	58.8611	59.4791	61.0124	65.4267	62.1303	64.8188	66.7296	63.44	68.272	52.7277	49.8651	45.6059
sp|P32493|AEP1_YEAST	AEP1	ATPase expression protein 1, mitochondrial	0	U	R.AVDSTLPIFIK.K	132.616	126.299	133.865	145.702	136.796	132.343	110.904	124.348	115.891	77.366	80.7936	76.5871
sp|P32493|AEP1_YEAST	AEP1	ATPase expression protein 1, mitochondrial	0	U	K.GILPEATIINR.Y	31.2237	28.0513	27.7437	30.1943	29.9998	24.8118	32.3299	26.365	18.6812	12.218	22.3045	19.0354
sp|P32493|AEP1_YEAST	AEP1	ATPase expression protein 1, mitochondrial	0	U	K.GILPEATIINR.Y	33.8745	48.2521	48.616	45.5024	49.1001	41.3141	38.7972	40.5045	43.6533	23.8252	23.4375	23.4707
sp|P32493|AEP1_YEAST	AEP1	ATPase expression protein 1, mitochondrial	0	U	K.NYGNSTEK.L	10.8505	13.5332	8.92909	11.0001	15.7932	13.0373	12.0435	13.6894	8.38066	6.7272	7.94705	5.92604
sp|P32493|AEP1_YEAST	AEP1	ATPase expression protein 1, mitochondrial	0	U	K.TILVDSK.L	193.545	187.346	213.581	216.608	226.093	220.741	201.637	183.377	191.765	129.816	126.922	123.005
sp|P32493|AEP1_YEAST	AEP1	ATPase expression protein 1, mitochondrial	0	U	R.YLEAIDVHFDK.S	47.5711	53.5747	61.326	54.3568	62.7806	64.2275	51.4759	48.3008	39.1787	29.7819	40.0922	40.0353
sp|P32493|AEP1_YEAST	AEP1	ATPase expression protein 1, mitochondrial	0	U	R.YLEAIDVHFDK.S	28.9475	31.2438	42.3738	43.5865	44.7091	34.6095	30.7591	34.7217	24.5567	23.8323	18.1222	19.1525
sp|P22136|AEP2_YEAST	AEP2	ATPase expression protein 2, mitochondrial	0	U	R.GLSILDSFIK.H	66.895	76	71.9251	48.7449	58.1722	51.69	56.5375	57.5468	48.0005	47.9095	36.998	46.3294
sp|P22136|AEP2_YEAST	AEP2	ATPase expression protein 2, mitochondrial	0	U	R.NPDILLSPK.N	52.9267	49.8349	60.0718	32.6029	44.2645	46.2978	42.882	38.3705	34.8839	36.8799	32.0649	28.2384
sp|P22136|AEP2_YEAST	AEP2	ATPase expression protein 2, mitochondrial	0	U	K.SISYLFAK.T	18.7351	20.6685	25.9168	13.1332	17.1961	13.4143	17.1425	14.7183	16.4523	10.2963	12.3252	13.972
sp|P22136|AEP2_YEAST	AEP2	ATPase expression protein 2, mitochondrial	0	U	K.ILSFILDR.N	37.5309	24.7622	38.5358	15.6298	17.0483	21.6446	24.8084	23.876	28.9306	15.7712	17.1208	24.2948
sp|P22136|AEP2_YEAST	AEP2	ATPase expression protein 2, mitochondrial	0	U	K.LFSLYAEK.V	40.0245	40.9491	39.4101	39.6433	51.7505	37.2391	49.8345	46.56	37.8706	52.4221	44.1353	35.1226
sp|P22136|AEP2_YEAST	AEP2	ATPase expression protein 2, mitochondrial	0	U	R.IISSSGMDESEFSK.S	42.9729	36.2424	36.681	25.6703	25.6357	22.1815	29.3905	32.6942	37.6491	26.0336	20.6499	21.2351
sp|P22136|AEP2_YEAST	AEP2	ATPase expression protein 2, mitochondrial	0	U	R.LFQLSHFAWTPANDK.K	38.0639	34.7269	38.9151	36.3754	26.6992	35.0461	51.0478	46.2424	45.2634	44.3753	42.6045	39.9653
sp|P22136|AEP2_YEAST	AEP2	ATPase expression protein 2, mitochondrial	0	U	K.NFIELGQLGK.A	78.6999	96.2804	99.4614	71.8393	64.0492	68.6988	76.6171	71.3575	64.7247	58.3401	54.952	66.6884
sp|P22136|AEP2_YEAST	AEP2	ATPase expression protein 2, mitochondrial	0	U	K.ILSFILDR.N	52.1933	37.7186	42.8025	40.3189	33.4544	40.0907	66.5014	76.9199	76.5481	74.1081	76.6803	80.2788
sp|P22136|AEP2_YEAST	AEP2	ATPase expression protein 2, mitochondrial	0	U	K.TGNFPLGIDVLR.S	14.046	15.801	19.4956	14.7606	12.6556	6.03006	15.0668	15.6171	8.63042	5.82994	7.34879	4.55108
sp|P22136|AEP2_YEAST	AEP2	ATPase expression protein 2, mitochondrial	0	U	R.EFIDSYGFDR.K	49.9508	53.6701	44.659	30.4892	35.5183	28.8759	37.3346	39.4731	41.9815	24.8144	28.9654	27.6755
sp|P22136|AEP2_YEAST	AEP2	ATPase expression protein 2, mitochondrial	0	U	R.LRPSVDYETLR.Q	14.0101	16.0691	18.056	10.8949	10.5786	10.1053	13.3887	13.4504	16.004	11.5759	10.5251	10.0486
sp|P22136|AEP2_YEAST	AEP2	ATPase expression protein 2, mitochondrial	0	U	K.LFSLYAEK.V	59.9769	64.9495	63.0072	70.8005	80.3412	81.2886	70.769	79.6832	69.7921	98.5831	78.7632	65.3307
sp|P22136|AEP2_YEAST	AEP2	ATPase expression protein 2, mitochondrial	0	U	K.TVDPEPK.D	330.286	357.694	371.48	203.167	204.188	219.639	279.76	263.35	275.956	180.312	186.427	168.917
sp|P22136|AEP2_YEAST	AEP2	ATPase expression protein 2, mitochondrial	0	U	K.NADISTIVHFLQLR.C	126.272	126.796	142.874	89.9715	104.849	95.5561	110.624	107.013	93.9525	66.3327	66.1564	84.4373
sp|Q12089|AEP3_YEAST	AEP3	ATPase expression protein 3	0	U	K.LLDYGFQHLK.S	61.061	53.5521	58.4527	33.7711	36.463	40.1774	35.6323	42.4849	30.1196	45.2279	35.6361	34.2862
sp|P32317|AFG1_YEAST	AFG1	Protein AFG1	0	U	R.HPDELYINGVQR.Q	59.1678	56.4764	51.1946	56.7825	50.3473	48.7208	40.603	30.92	38.6278	33.1707	33.2757	37.0415
sp|P32317|AFG1_YEAST	AFG1	Protein AFG1	0	U	K.VIFLNSPTDYR.K	37.5224	37.6601	36.556	30.0877	40.9179	39.2532	15.9372	21.1339	19.243	13.6459	21.2672	19.6508
sp|P32317|AFG1_YEAST	AFG1	Protein AFG1	0	U	K.YVPPVVK.T	160.955	157.664	176.189	163.12	179.736	184.544	84.1235	72.7449	89.924	85.6385	82.4106	86.2559
sp|P32317|AFG1_YEAST	AFG1	Protein AFG1	0	U	K.TPNAVDQVGGWLNGLK.S	11.7064	8.83219	9.9485	12.6185	12.6263	12.5332	5.56929	7.75024	7.9544	12.2401	6.38247	5.08884
sp|P32317|AFG1_YEAST	AFG1	Protein AFG1	0	U	K.EWYNYFAQASHTDDSTDSHTVHK.T	73.0992	77.3554	73.7415	97.3219	78.2714	82.7815	36.6926	49.4405	51.4122	43.0972	39.2319	57.6799
sp|P32317|AFG1_YEAST	AFG1	Protein AFG1	0	U	R.VAQFTFK.Q	134.114	139.741	165.315	132.527	136.276	145.738	79.2903	61.7628	79.4262	63.6643	70.6341	61.3994
sp|P32317|AFG1_YEAST	AFG1	Protein AFG1	0	U	K.EPDSVDTGMVDEMVEK.H	128.37	122.435	136.704	139.466	134.861	134.579	63.9492	71.3233	72.1358	54.9699	75.7756	56.3844
sp|P32317|AFG1_YEAST	AFG1	Protein AFG1	0	U	R.PVSSVYYFPSDTSIK.Y	19.3707	14.7431	24.223	19.3208	23.7859	20.397	9.8839	7.64173	17.3735	9.26147	5.69325	12.3785
sp|P32317|AFG1_YEAST	AFG1	Protein AFG1	0	U	K.YVPPVVK.T	176.194	171.819	170.613	168.427	187.318	177.094	113.739	107.794	125.37	136.41	145.287	126.988
sp|P32317|AFG1_YEAST	AFG1	Protein AFG1	0	U	K.SQMFALDEER.F	19.6015	28.7967	28.1424	38.8833	34.0741	31.999	14.4955	11.6809	13.2073	11.6333	11.7234	8.1826
sp|P32317|AFG1_YEAST	AFG1	Protein AFG1	0	U	R.HPDELYINGVQR.Q	74.0648	69.6324	76.9597	73.5219	84.9933	76.9544	30.8298	30.5694	42.2883	32.2713	33.7844	42.2707
sp|P32317|AFG1_YEAST	AFG1	Protein AFG1	0	U	K.TPNAVDQVGGWLNGLK.S	10.5676	12.3193	10.7782	17.3982	14.623	18.7915	10.7934	6.402	7.43244	10.0123	2.41014	9.85626
sp|P32317|AFG1_YEAST	AFG1	Protein AFG1	0	U	K.TPNAVDQVGGWLNGLK.S	9.99178	10.7094	11.8761	18.694	18.3101	16.7108	5.42655	11.1106	5.15478	7.59906	6.06147	4.32363
sp|P32794|AFG2_YEAST	AFG2	ATPase family gene 2 protein	0	U	K.AQVQPPYATK.V	132.303	143.4	148.245	135.189	159.618	138.328	337.009	340.799	330.415	348.66	336.317	315.428
sp|P32794|AFG2_YEAST	AFG2	ATPase family gene 2 protein	0	U	R.FDQEVEIGIPDVDAR.F	4.08139	3.59518	5.52599	8.30921	6.6753	8.22611	20.476	17.0709	17.0268	18.9114	19.7403	24.5646
sp|P32794|AFG2_YEAST	AFG2	ATPase family gene 2 protein	0	U	K.IGENGILVIAR.A	15.5748	17.7973	18.4765	15.8371	15.2561	16.5255	43.8714	37.4012	41.6032	35.3809	34.8201	42.3502
sp|P32794|AFG2_YEAST	AFG2	ATPase family gene 2 protein	0	U	K.YNLPEPLSYAAVGGLDK.E	44.3908	40.7711	32.3883	33.852	32.8479	30.2092	68.3334	63.9346	74.8232	75.3251	60.8418	73.3177
sp|P32794|AFG2_YEAST	AFG2	ATPase family gene 2 protein	0	U	R.AGDEEVHPVNVITLSTTIR.S	6.75545	6.50671	6.89244	9.14944	7.21275	5.56001	21.3375	20.4527	22.3422	21.7752	20.9332	22.1636
sp|P32794|AFG2_YEAST	AFG2	ATPase family gene 2 protein	0	U	R.HVLDSEAIK.Y	16.72	16.4456	14.5299	20.7083	17.1326	10.7475	31.7244	31.8391	33.9236	35.3612	37.7543	37.4769
sp|P32794|AFG2_YEAST	AFG2	ATPase family gene 2 protein	0	U	K.SAIEIPLHQPTLFSSFGVSPPR.G	7.39454	5.13758	7.98503	13.1447	7.47285	9.38929	27.61	18.3759	40.5534	24.2052	25.2225	42.4008
sp|P32794|AFG2_YEAST	AFG2	ATPase family gene 2 protein	0	U	K.SAIEIPLHQPTLFSSFGVSPPR.G	17.2376	18.7083	11.9191	22.7728	21.8164	15.9424	51.056	40.9991	60.3069	40.6364	52.489	82.6112
sp|P32794|AFG2_YEAST	AFG2	ATPase family gene 2 protein	0	U	K.FNTEESGVDLHELADR.T	8.04801	4.8199	10.6781	10.5356	6.73488	6.14045	12.5101	10.487	7.95039	16.1936	12.5362	11.3965
sp|P32794|AFG2_YEAST	AFG2	ATPase family gene 2 protein	0	U	K.FNTEESGVDLHELADR.T	10.2616	10.2455	17.8047	11.7807	14.5367	8.28854	12.5919	13.8313	12.9739	16.1958	14.2194	11.2905
sp|P32794|AFG2_YEAST	AFG2	ATPase family gene 2 protein	0	U	K.YLGETEAALR.D	8.22184	9.67075	10.7927	15.4467	13.7656	15.733	17.2684	28.0838	22.0327	25.4924	26.0682	29.4129
sp|P32794|AFG2_YEAST	AFG2	ATPase family gene 2 protein	0	U	K.YLGETEAALR.D	44.949	44.9204	46.2073	56.6789	59.9638	49.0231	100.079	111.172	99.5692	112.473	116.76	110.139
sp|P32794|AFG2_YEAST	AFG2	ATPase family gene 2 protein	0	U	K.SSSSGSK.K	19.2802	14.5406	18.0886	12.9369	13.0058	14.9124	19.9093	23.2916	20.3113	18.3575	19.8892	19.1436
sp|P32794|AFG2_YEAST	AFG2	ATPase family gene 2 protein	0	U	R.GILLHGPPGTGK.T	318.024	307.35	304.945	333.048	326.632	336.88	727.255	717.029	705.464	756.652	753.078	759.935
sp|P32794|AFG2_YEAST	AFG2	ATPase family gene 2 protein	0	U	K.YQPSIIFIDEIDSIAPNR.A	162.362	160.279	148.968	200.382	200.861	181.914	469.175	486.905	435.627	491.968	466.319	443.781
sp|P32794|AFG2_YEAST	AFG2	ATPase family gene 2 protein	0	U	K.SSASSNSADAK.A	9.34388	9.20077	10.1964	8.17043	10.3329	12.3821	17.898	23.0852	21.2774	17.4178	25.0667	20.3461
sp|P32794|AFG2_YEAST	AFG2	ATPase family gene 2 protein	0	U	R.SVGNLILGDR.L	18.6459	18.3988	16.6136	15.0398	19.1575	15.5685	35.5608	34.1356	32.5793	32.1092	37.8849	30.9666
sp|P39925|AFG3_YEAST	AFG3	Mitochondrial respiratory chain complexes assembly protein AFG3	0	U	R.HIQIDSPDVNGR.Q	43.248	46.3697	44.4143	57.5416	55.1841	56.2806	35.3034	33.4826	38.1068	26.4151	21.9004	25.2179
sp|P39925|AFG3_YEAST	AFG3	Mitochondrial respiratory chain complexes assembly protein AFG3	0	U	R.LNLDPLLTDDMNNLSGK.L	122.123	119.319	129.429	161.122	180.822	163.089	117.769	108.686	107.74	92.8365	94.648	96.7496
sp|P39925|AFG3_YEAST	AFG3	Mitochondrial respiratory chain complexes assembly protein AFG3	0	U	K.FLVEAELVNTK.Q	167.284	175.942	168.912	186.391	213.651	196.321	201.699	197.969	191.533	181.36	176.092	177.786
sp|P39925|AFG3_YEAST	AFG3	Mitochondrial respiratory chain complexes assembly protein AFG3	0	U	R.VIAGLEK.K	153.474	144.613	136.943	170.868	182.781	166.009	138.186	125.925	141.444	123.08	91.763	100.508
sp|P39925|AFG3_YEAST	AFG3	Mitochondrial respiratory chain complexes assembly protein AFG3	0	U	K.INSSPPNANGGGGGGLGGMFNVGK.S	13.9091	18.181	16.7756	26.1171	19.4476	23.5171	14.1363	13.3858	19.2857	14.6636	9.40339	12.2924
sp|P39925|AFG3_YEAST	AFG3	Mitochondrial respiratory chain complexes assembly protein AFG3	0	U	K.INSSPPNANGGGGGGLGGMFNVGK.S	30.7536	43.2061	35.313	52.1949	47.6521	55.7661	30.823	26.3191	31.8242	28.6176	28.3984	24.6489
sp|P39925|AFG3_YEAST	AFG3	Mitochondrial respiratory chain complexes assembly protein AFG3	0	U	K.SNTEPPEAPAATN.-	192.678	186.73	180.924	245.588	237.881	227.958	173.079	172.999	179.874	136.215	137.398	130.463
sp|P39925|AFG3_YEAST	AFG3	Mitochondrial respiratory chain complexes assembly protein AFG3	0	U	R.GQGALGYAQYLPPDQYLISEEQFR.H	17.3325	11.1311	16.7546	24.638	17.5232	20.851	16.5138	9.28934	17.825	9.05847	18.8098	16.8793
sp|P39925|AFG3_YEAST	AFG3	Mitochondrial respiratory chain complexes assembly protein AFG3	0	U	R.NEFGSLSEYFR.S	14.5539	12.7534	11.585	14.3161	17.103	15.9999	13.2141	17.6436	7.34443	10.9803	12.9964	11.7596
sp|P39925|AFG3_YEAST	AFG3	Mitochondrial respiratory chain complexes assembly protein AFG3	0	U	R.QQIYLVHLK.R	914.083	881.633	908.387	1291.3	1118.91	1138.39	783.099	756.837	870.173	640.167	627.117	691.003
sp|P39925|AFG3_YEAST	AFG3	Mitochondrial respiratory chain complexes assembly protein AFG3	0	U	K.QEIMEFVHFLK.N	146.777	152.291	149.898	164.562	172.919	180.075	120.567	121.798	112.164	101.178	91.3687	84.9491
sp|P39925|AFG3_YEAST	AFG3	Mitochondrial respiratory chain complexes assembly protein AFG3	0	U	R.VLTFQDFK.T	51.1907	52.6923	48.3601	52.0534	69.2577	52.4663	45.2431	39.7414	35.9817	32.9803	28.5655	37.6236
sp|P39925|AFG3_YEAST	AFG3	Mitochondrial respiratory chain complexes assembly protein AFG3	0	U	K.INSSPPNANGGGGGGLGGMFNVGK.S	46.6687	44.0458	53.1285	56.8961	46.5423	53.1351	40.5114	35.9419	42.0861	43.0802	25.8544	34.9624
sp|P39925|AFG3_YEAST	AFG3	Mitochondrial respiratory chain complexes assembly protein AFG3	0	U	K.INSSPPNANGGGGGGLGGMFNVGK.S	15.701	19.3313	19.1004	24.8091	20.6126	18.477	13.4258	9.92684	13.2041	14.242	16.6168	11.4914
sp|P39925|AFG3_YEAST	AFG3	Mitochondrial respiratory chain complexes assembly protein AFG3	0	U	K.QEIMEFVHFLK.N	576.384	553.349	568.108	721.964	699.976	723.057	476.164	439.063	465.282	368.384	365.259	376.309
sp|P39925|AFG3_YEAST	AFG3	Mitochondrial respiratory chain complexes assembly protein AFG3	0	U	K.FLVEAELVNTK.Q	37.9801	38.1939	39.0708	44.9454	42.5355	45.3197	30.745	31.7693	34.2453	28.0702	28.8321	19.4545
sp|P39925|AFG3_YEAST	AFG3	Mitochondrial respiratory chain complexes assembly protein AFG3	0	U	R.GQGALGYAQYLPPDQYLISEEQFR.H	23.2212	28.3292	23.4666	35.9365	32.428	29.108	19.9817	23.0062	24.5309	12.105	12.9276	16.7519
sp|P39925|AFG3_YEAST	AFG3	Mitochondrial respiratory chain complexes assembly protein AFG3	0	U	R.GQGALGYAQYLPPDQYLISEEQFR.H	23.5672	15.8363	17.5451	27.3774	20.8492	23.813	15.9132	19.4561	13.8172	13.0711	15.8918	16.5249
sp|P39925|AFG3_YEAST	AFG3	Mitochondrial respiratory chain complexes assembly protein AFG3	0	U	R.NEFGSLSEYFR.S	24.334	28.2525	30.3377	39.2453	38.8772	32.991	25.1939	21.7115	23.0223	22.6816	19.2416	24.7546
sp|P39925|AFG3_YEAST	AFG3	Mitochondrial respiratory chain complexes assembly protein AFG3	0	U	R.VLTFQDFK.T	70.0073	65.7572	68.9451	75.718	75.007	70.704	54.3087	59.8262	64.8037	50.5954	48.6171	49.3031
sp|P39925|AFG3_YEAST	AFG3	Mitochondrial respiratory chain complexes assembly protein AFG3	0	U	R.VLTFQDFK.T	57.3326	57.8864	64.8788	65.1399	74.1818	69.4287	48.3235	53.7509	47.4204	42.4743	45.4541	33.2742
sp|Q99222|AFI1_YEAST	AFI1	ARF3-interacting protein 1	0	U	R.REPIYIENDYNELVLK.F	7.0134	9.29715	11.7571	9.02169	9.93608	7.50745	11.761	16.3627	9.09349	12.6414	10.576	10.008
sp|Q99222|AFI1_YEAST	AFI1	ARF3-interacting protein 1	0	U	K.LVINSTK.L	53.7631	67.3309	63.6576	54.4739	65.9228	57.4239	65.6017	61.5157	73.1604	56.3691	59.567	68.7624
sp|P33304|AFR1_YEAST	AFR1	Protein AFR1	0	U	K.VSFRDTEK.H	124.858	155.418	169.492	93.5661	127.482	130.264	270.963	333.496	222.559	208.693	197.781	140.936
sp|P22149|AFT1_YEAST	AFT1	Iron-regulated transcriptional activator AFT1	0	U	K.SASEYVVNHNEGR.A	3.77091	6.14938	10.5014	8.1342	8.18953	7.00791	18.8538	16.6614	21.8648	25.3961	24.7698	25.3983
sp|P22149|AFT1_YEAST	AFT1	Iron-regulated transcriptional activator AFT1	0	U	K.FNPDSEEYK.K	19.9364	26.5175	20.4722	20.477	24.8365	15.7164	37.5018	34.3523	27.6726	47.5071	51.2044	39.0322
sp|P22149|AFT1_YEAST	AFT1	Iron-regulated transcriptional activator AFT1	0	U	K.SASEYVVNHNEGR.A	36.1015	39.7214	41.7461	39.4338	49.8503	35.8947	108.313	105.223	115.903	169.334	161.278	162.882
sp|P22149|AFT1_YEAST	AFT1	Iron-regulated transcriptional activator AFT1	0	U	K.LNQNNLIHLDPVPNFEDK.S	63.5723	57.0586	70.916	60.6184	67.0094	66.5776	68.3196	86.9616	77.8709	102.282	118.275	106.179
sp|Q08957|AFT2_YEAST	AFT2	Iron-regulated transcriptional activator AFT2	0	U	K.LIHLDPVPSFEDR.H	3.10508	3.53578	2.55286	5.74637	6.63549	5.62352	14.7303	14.995	18.2625	20.9665	9.84564	13.624
sp|Q12482|AGC1_YEAST	AGC1	Mitochondrial aspartate-glutamate transporter AGC1	0	U	R.DVPFSAIYFPTYAHLK.K	15.0815	17.3046	19.26	25.7885	25.4996	24.1986	17.3087	19.4953	18.0993	28.2368	18.6246	24.4203
sp|Q12482|AGC1_YEAST	AGC1	Mitochondrial aspartate-glutamate transporter AGC1	0	U	-.MEQINSNSRK.K	117.444	106.362	111.541	55.9997	64.7276	56.5863	54.4675	63.3976	74.9867	50.0987	54.2973	45.6517
sp|Q12482|AGC1_YEAST	AGC1	Mitochondrial aspartate-glutamate transporter AGC1	0	U	K.DLFDFDPNDK.T	44.7821	45.3477	51.7431	54.6924	59.5856	49.7819	27.7862	28.7261	25.9434	28.4431	19.0291	22.042
sp|Q12482|AGC1_YEAST	AGC1	Mitochondrial aspartate-glutamate transporter AGC1	0	U	R.LQVQSDYVGENIQQANETATQIVK.K	53.0392	58.9318	70.1484	51.0044	70.8343	65.2773	34.9756	38.0054	28.2566	33.5341	32.2093	25.0593
sp|Q12482|AGC1_YEAST	AGC1	Mitochondrial aspartate-glutamate transporter AGC1	0	U	R.SDLTIEDFMK.I	80.2193	81.6967	76.6886	91.1809	83.6294	86.7936	49.6412	48.3555	43.8376	38.4431	43.6695	39.664
sp|Q12482|AGC1_YEAST	AGC1	Mitochondrial aspartate-glutamate transporter AGC1	0	U	R.SDLTIEDFMK.I	92.6534	110.698	93.2663	105.843	97.7001	113.385	51.7204	59.6708	57.9614	60.5361	48.7006	49.6197
sp|Q12482|AGC1_YEAST	AGC1	Mitochondrial aspartate-glutamate transporter AGC1	0	U	R.LQVQSDYVGENIQQANETATQIVK.K	29.4892	36.7971	37.7566	33.6377	34.665	49.2699	23.6182	25.6027	26.0521	27.3665	24.0686	24.6405
sp|Q12482|AGC1_YEAST	AGC1	Mitochondrial aspartate-glutamate transporter AGC1	0	U	R.FDSSVYK.N	110.307	117.594	114.266	136.992	155.811	149.182	80.4749	87.8904	79.3042	62.2465	70.0097	71.9853
sp|Q12482|AGC1_YEAST	AGC1	Mitochondrial aspartate-glutamate transporter AGC1	0	U	K.IFIGFDR.L	28.8244	36.9152	45.0233	43.6494	41.7341	39.1607	31.5791	28.4332	19.7302	27.1552	28.7817	27.6828
sp|Q12482|AGC1_YEAST	AGC1	Mitochondrial aspartate-glutamate transporter AGC1	0	U	K.YVTENNLNEQDIR.E	15.295	15.092	15.3245	18.4981	15.2991	14.2952	9.01406	7.30387	7.25442	9.1711	3.61552	6.70595
sp|Q12482|AGC1_YEAST	AGC1	Mitochondrial aspartate-glutamate transporter AGC1	0	U	K.YNGIFHAIR.T	134.885	150.673	151.279	171.315	163.025	166.091	91.0303	84.7193	87.9064	67.4486	66.6412	73.4802
sp|Q12482|AGC1_YEAST	AGC1	Mitochondrial aspartate-glutamate transporter AGC1	0	U	K.QQLEVFK.Y	81.6366	81.0712	78.4345	90.1339	100.866	88.5024	54.5452	66.3304	57.1539	47.5997	57.3051	44.8171
sp|Q12482|AGC1_YEAST	AGC1	Mitochondrial aspartate-glutamate transporter AGC1	0	U	K.QQLEVFK.Y	38.6477	40.7827	43.5733	53.8326	45.5318	41.6524	37.0264	41.4967	36.3703	34.4318	33.5869	30.3096
sp|Q04412|AGE1_YEAST	AGE1	ADP-ribosylation factor GTPase-activating protein effector protein 1	0	U	R.WSLSSIPK.S	56.0329	64.1005	61.6614	45.2192	42.3842	42.2969	54.2491	61.9241	67.5324	54.8342	56.9077	53.3545
sp|Q04412|AGE1_YEAST	AGE1	ADP-ribosylation factor GTPase-activating protein effector protein 1	0	U	K.FVIDSNQGR.E	102.981	118.171	107.927	71.5763	76.3947	75.6279	123.192	110.848	115.361	97.857	92.9065	90.4101
sp|Q04412|AGE1_YEAST	AGE1	ADP-ribosylation factor GTPase-activating protein effector protein 1	0	U	K.SSQNLMSPTNLLTMHK.S	86.6133	88.0092	85.463	76.8743	69.225	72.8391	111.185	105.036	121.706	101.045	109.887	102.007
sp|P40529|AGE2_YEAST	AGE2	ADP-ribosylation factor GTPase-activating protein effector protein 2	0	U	R.ANSYYEATLADELK.Q	52.0856	49.085	51.5499	46.4941	63.0198	47.1613	78.9592	76.2068	77.9094	59.2522	64.7691	63.8907
sp|P40529|AGE2_YEAST	AGE2	ADP-ribosylation factor GTPase-activating protein effector protein 2	0	U	R.LDQSSNSLQK.T	51.0463	41.9743	35.7271	41.4478	42.484	33.6796	57.8118	50.1998	54.1644	57.7073	64.6166	52.3878
sp|P40529|AGE2_YEAST	AGE2	ADP-ribosylation factor GTPase-activating protein effector protein 2	0	U	R.SNTSLLNLQVSSLSK.T	17.6752	13.0591	14.5146	10.6063	13.5609	13.8285	41.9889	37.5544	55.3558	48.0223	48.5136	48.7144
sp|P40529|AGE2_YEAST	AGE2	ADP-ribosylation factor GTPase-activating protein effector protein 2	0	U	R.SNTSLLNLQVSSLSK.T	31.7344	25.8037	25.8736	22.1578	19.722	21.894	87.6208	68.3815	111.802	92.6111	86.154	93.1514
sp|P40529|AGE2_YEAST	AGE2	ADP-ribosylation factor GTPase-activating protein effector protein 2	0	U	K.TQTQPPSHLLSTSR.S	224.689	182.125	204.87	213.843	177.925	172.739	322.784	280.952	419.094	325.936	316.29	379.196
sp|P40529|AGE2_YEAST	AGE2	ADP-ribosylation factor GTPase-activating protein effector protein 2	0	U	K.SVDLDTWK.E	89.6857	118.574	99.9697	65.1721	81.445	71.5525	123.331	129.454	97.1459	102.923	95.4582	82.6087
sp|P40529|AGE2_YEAST	AGE2	ADP-ribosylation factor GTPase-activating protein effector protein 2	0	U	K.SILSLYSK.P	32.9496	30.8269	40.35	23.2614	29.1062	29.3919	67.3598	62.5458	67.2755	60.8184	58.2277	60.1132
sp|P40529|AGE2_YEAST	AGE2	ADP-ribosylation factor GTPase-activating protein effector protein 2	0	U	R.LDQSSNSLQK.T	13.6639	18.862	22.3811	19.3755	16.6071	19.9737	26.799	28.8508	24.0976	26.3081	26.0877	27.7228
sp|P40529|AGE2_YEAST	AGE2	ADP-ribosylation factor GTPase-activating protein effector protein 2	0	U	K.SVDLDTWKEEHLVK.L	41.1891	49.3077	44.1998	303.785	250.36	269.301	51.4926	44.7506	32.523	270.488	295.498	369.806
sp|P25376|AGP1_YEAST	AGP1	General amino acid permease AGP1	0	U	K.NESSDNIGANTGHK.S	47.5983	53.8385	54.0396	69.6839	57.8596	59.9695	39.17	44.8271	45.5445	14.501	17.6625	20.4816
sp|P25376|AGP1_YEAST	AGP1	General amino acid permease AGP1	0	U	K.VFSYIDR.A	19.2151	21.757	22.0055	24.3547	21.378	23.1863	17.1676	15.264	13.8368	16.7753	20.8976	10.6014
sp|P25376|AGP1_YEAST	AGP1	General amino acid permease AGP1	0	U	K.ASPYVIAVASHGVR.V	155.789	169.732	179.103	193.647	176.052	174.722	97.8072	91.7792	107.39	45.3604	35.0971	43.0429
sp|P25376|AGP1_YEAST	AGP1	General amino acid permease AGP1	0	U	K.YWHDPGAFNGK.H	17.8167	18.6312	16.1828	19.257	21.9761	17.798	9.03296	9.45856	10.9462	8.03231	2.05006	2.83225
sp|P25376|AGP1_YEAST	AGP1	General amino acid permease AGP1	0	U	R.ADQGPQDEVEATQMNDLTSAISPSSR.Q	18.8302	15.4977	14.2052	9.60887	12.0786	13.5522	16.8142	17.8989	15.7927	6.04823	7.99918	6.60479
sp|P25376|AGP1_YEAST	AGP1	General amino acid permease AGP1	0	U	K.VFSYIDR.A	17.4965	23.0632	21.4713	18.6388	19.8942	16.9962	9.83302	11.7178	7.52668	2.23337	6.24476	5.63738
sp|P25376|AGP1_YEAST	AGP1	General amino acid permease AGP1	0	U	R.QIFDEELIK.Q	15.636	15.554	25.0805	19.3167	18.8868	17.7771	9.96096	10.4035	12.3222	6.41466	5.68678	0
sp|P25376|AGP1_YEAST	AGP1	General amino acid permease AGP1	0	U	R.QIFDEELIK.Q	29.0586	27.8438	32.9491	31.247	29.5773	30.9682	14.559	16.314	14.2621	6.84663	8.44157	7.67537
sp|P25376|AGP1_YEAST	AGP1	General amino acid permease AGP1	0	U	K.QEDEEYR.E	17.7415	18.7292	17.6006	15.4979	19.0314	21.5992	10.556	13.5406	8.49344	1.92217	6.16637	4.35033
sp|P25376|AGP1_YEAST	AGP1	General amino acid permease AGP1	0	U	R.SLGELGFK.S	103.486	111.487	94.3085	99.752	123.018	115.958	79.8575	86.9351	88.6545	48.4262	60.4548	45.221
sp|P25376|AGP1_YEAST	AGP1	General amino acid permease AGP1	0	U	K.VFSYIDR.A	101.452	118.846	110.348	95.5732	122.163	105.481	63.0565	64.1053	70.1395	27.6768	29.2577	27.7157
sp|P25376|AGP1_YEAST	AGP1	General amino acid permease AGP1	0	U	K.ASPYVIAVASHGVR.V	76.5055	80.9318	89.4653	90.5026	84.9056	98.7201	47.5677	49.7724	49.9164	19.7931	22.7943	20.3662
sp|P38090|AGP2_YEAST	AGP2	General amino acid permease AGP2	0	U	R.TFYGMALDGYAPK.I	31.2795	31.8511	37.6937	11.3369	12.871	13.3705	7.35811	5.45234	7.00197	5.36975	7.31147	4.9961
sp|P38090|AGP2_YEAST	AGP2	General amino acid permease AGP2	0	U	R.TFYGMALDGYAPK.I	968.513	1069.45	1120.99	323.959	353.791	382.897	159.025	150.481	177.386	101.432	107.963	105.413
sp|P38090|AGP2_YEAST	AGP2	General amino acid permease AGP2	0	U	K.ELTEIENHEIESSFEK.F	80.6095	89.5269	72.6752	55.8235	51.8544	55.6771	29.3198	27.8983	25.9565	20.6791	23.3948	26.8467
sp|P38090|AGP2_YEAST	AGP2	General amino acid permease AGP2	0	U	R.NYGESPFK.K	97.6113	95.0885	101.921	44.5898	51.2612	38.0896	21.2934	23.565	26.8432	16.2006	18.4822	18.7953
sp|P38090|AGP2_YEAST	AGP2	General amino acid permease AGP2	0	U	K.YFPDGNDVGK.S	108.883	122.557	116.614	36.8881	38.4488	39.8869	14.4827	16.2101	16.9819	12.4063	14.506	8.15558
sp|P38090|AGP2_YEAST	AGP2	General amino acid permease AGP2	0	U	K.ELTEIENHEIESSFEK.F	83.2713	100.939	100.896	34.2368	43.9463	42.801	20.8866	26.0355	23.0045	20.2119	12.9158	14.218
sp|P38090|AGP2_YEAST	AGP2	General amino acid permease AGP2	0	U	R.NYGESPFK.K	104.764	108.73	96.2996	40.5899	45.4814	39.4944	31.5063	34.2687	27.5592	18.6651	25.2916	17.8094
sp|P43567|AGX1_YEAST	AGX1	Alanine--glyoxylate aminotransferase 1	0	U	K.DSLVNGLQLTSVSR.Y	15.2289	18.0126	17.2812	24.3172	22.582	20.0635	1.44672	4.16213	4.79142	0	0	2.57161
sp|P43567|AGX1_YEAST	AGX1	Alanine--glyoxylate aminotransferase 1	0	U	K.LSQNSYGAVTVTHVDTSTAVLSDLK.A	65.8748	61.58	68.4284	90.4726	84.5722	87.0558	19.3665	21.4673	27.6555	17.6133	20.5279	17.4851
sp|P43567|AGX1_YEAST	AGX1	Alanine--glyoxylate aminotransferase 1	0	U	K.NVLVVSTGTFSDR.F	54.0292	55.3298	62.102	71.1337	60.4362	71.3997	11.0795	11.5182	11.9756	11.1846	7.01606	10.147
sp|P43567|AGX1_YEAST	AGX1	Alanine--glyoxylate aminotransferase 1	0	U	K.DSLVNGLQLTSVSR.Y	60.2128	55.7062	56.2017	88.1403	81.4359	88.9932	15.1104	9.74365	14.0933	6.07308	8.16293	11.1782
sp|P43567|AGX1_YEAST	AGX1	Alanine--glyoxylate aminotransferase 1	0	U	R.FMDYALNDSK.N	31.5475	22.9427	26.3118	39.2166	37.3826	39.7529	3.19427	3.27383	6.3817	2.64773	0	3.11768
sp|P43567|AGX1_YEAST	AGX1	Alanine--glyoxylate aminotransferase 1	0	U	K.AISQAIK.Q	163.475	181.648	191.989	232.595	239.403	256.825	34.8191	31.7304	32.9701	16.9292	17.0804	10.6889
sp|P43567|AGX1_YEAST	AGX1	Alanine--glyoxylate aminotransferase 1	0	U	K.SHGVVIAGGIHK.D	156.443	147.614	157.273	206.464	214.614	222.747	40.7384	40.8836	40.0421	26.9735	21.6504	29.4498
sp|P43567|AGX1_YEAST	AGX1	Alanine--glyoxylate aminotransferase 1	0	U	R.SYGAQVDVVRPLK.I	36.3412	36.142	34.9314	43.5881	42.6512	41.9816	19.8596	23.1609	22.8832	18.9294	20.7269	24.9395
sp|P43567|AGX1_YEAST	AGX1	Alanine--glyoxylate aminotransferase 1	0	U	K.EILEEGLHK.R	96.2063	96.0039	100.101	137.304	127.607	117.558	19.2711	25.1652	28.6421	17.9777	14.0636	18.5539
sp|P43567|AGX1_YEAST	AGX1	Alanine--glyoxylate aminotransferase 1	0	U	K.NVLVVSTGTFSDR.F	18.9564	14.7517	21.8546	20.0356	26.7416	23.5661	3.8657	3.06098	5.31782	3.47795	0	3.98434
sp|P43567|AGX1_YEAST	AGX1	Alanine--glyoxylate aminotransferase 1	0	U	R.WTPIM*ENYEAGK.G	151.288	134.801	133.976	111.053	135.311	98.448	57.7658	36.176	33.4624	28.0496	24.3749	22.863
sp|P43567|AGX1_YEAST	AGX1	Alanine--glyoxylate aminotransferase 1	0	U	K.SHGVVIAGGIHK.D	549.114	565.455	591.93	830.158	843.703	845.453	107.808	104.934	112.74	59.9323	46.4009	54.3672
sp|P43567|AGX1_YEAST	AGX1	Alanine--glyoxylate aminotransferase 1	0	U	K.EILEEGLHK.R	244.543	246.468	245.528	294.935	343.312	325.339	57.4694	71.4474	89.645	47.7191	36.1748	38.0568
sp|P43567|AGX1_YEAST	AGX1	Alanine--glyoxylate aminotransferase 1	0	U	K.EILEEGLHK.R	174.853	171.244	177.718	188.476	212.42	209.72	53.5191	59.0115	52.1965	49.2077	56.3206	47.3568
sp|P43567|AGX1_YEAST	AGX1	Alanine--glyoxylate aminotransferase 1	0	U	K.SVDTLLIPGPIILSGAVQK.A	15.432	15.0273	15.6823	20.3952	19.2543	21.293	3.64993	3.6961	2.83346	2.84083	3.66363	0
sp|P43567|AGX1_YEAST	AGX1	Alanine--glyoxylate aminotransferase 1	0	U	R.WTPIMENYEAGK.G	139.833	138.286	144.808	205.975	212.019	196.096	33.6319	43.4239	36.695	61.09	63.2728	50.358
sp|P43567|AGX1_YEAST	AGX1	Alanine--glyoxylate aminotransferase 1	0	U	R.WTPIM*ENYEAGK.G	318.153	238.995	258.125	205.165	305.205	209.47	56.0425	51.753	52.9071	36.04	26.0256	26.7253
sp|P43567|AGX1_YEAST	AGX1	Alanine--glyoxylate aminotransferase 1	0	U	K.LSQNSYGAVTVTHVDTSTAVLSDLK.A	112.493	99.3085	89.5823	139.199	148.968	136.327	16.1386	14.4899	23.2755	7.88924	12.9986	9.57814
sp|Q12449|AHA1_YEAST	AHA1	Hsp90 co-chaperone AHA1	0	U	R.QIFQQFGK.D	88.5803	81.8313	80.6953	31.7481	32.6243	39.0174	47.4935	47.8796	51.4938	21.2277	20.1918	18.329
sp|Q12449|AHA1_YEAST	AHA1	Hsp90 co-chaperone AHA1	0	U	K.SSFTEIK.D	307.034	309.012	341.695	144.268	128.031	160.065	166.232	174.661	195.705	60.3654	83.3458	75.6247
sp|Q12449|AHA1_YEAST	AHA1	Hsp90 co-chaperone AHA1	0	U	K.VPQNGSGNSTSIYLEPTFNVPSSELYETFLDK.Q	92.043	79.5436	89.9736	32.7315	37.3723	42.1586	48.9211	49.4933	67.1041	25.0724	17.7932	22.8684
sp|Q12449|AHA1_YEAST	AHA1	Hsp90 co-chaperone AHA1	0	U	R.QIFQQFGK.D	43.9529	41.8548	38.4398	16.0747	18.1968	17.2714	23.7013	25.4388	23.3147	8.94816	10.1571	10.3123
sp|Q12449|AHA1_YEAST	AHA1	Hsp90 co-chaperone AHA1	0	U	K.LVGVEAGSVK.D	214.221	220.463	182.093	100.113	100.692	100.053	113.232	141.803	132.766	68.0234	50.1119	54.5543
sp|Q12449|AHA1_YEAST	AHA1	Hsp90 co-chaperone AHA1	0	U	K.ITVLIEGHVDSK.D	498.264	464.546	483.721	180.728	188.687	174.974	356.515	405.453	320.586	111.359	124.92	122.12
sp|Q12449|AHA1_YEAST	AHA1	Hsp90 co-chaperone AHA1	0	U	K.WTGIPVGEEDR.V	25.9433	33.391	29.3536	12.6316	17.1813	12.9871	18.7472	18.5459	15.3175	6.63949	8.33618	6.76356
sp|Q12449|AHA1_YEAST	AHA1	Hsp90 co-chaperone AHA1	0	U	K.DLLATHGNDIQVPESQVK.S	417.092	386.434	414.409	180.727	163.985	167.382	222.185	214.931	247.533	90.6024	85.1601	87.1108
sp|Q12449|AHA1_YEAST	AHA1	Hsp90 co-chaperone AHA1	0	U	K.NALPSSTSTSAPVSSTNK.V	263.332	256.998	272.104	120.033	117.475	113.2	161.97	149.969	160.91	59.9595	54.1259	61.3548
sp|Q12449|AHA1_YEAST	AHA1	Hsp90 co-chaperone AHA1	0	U	R.QIFQQFGK.D	38.0212	39.9706	36.3663	19.6689	12.4655	16.1397	22.346	19.3536	22.7625	12.4911	7.76693	9.30285
sp|Q12449|AHA1_YEAST	AHA1	Hsp90 co-chaperone AHA1	0	U	K.ITVLIEGHVDSK.D	1026.89	1112.15	1117.7	436.329	480.697	512.881	843.695	940.853	759.302	303.582	315.476	312.07
sp|Q12449|AHA1_YEAST	AHA1	Hsp90 co-chaperone AHA1	0	U	K.DLLATHGNDIQVPESQVK.S	66.8473	65.256	69.9504	39.9719	34.7166	31.2336	46.7954	45.0666	48.2421	22.3708	22.7346	22.8764
sp|Q12449|AHA1_YEAST	AHA1	Hsp90 co-chaperone AHA1	0	U	K.ETSELSEAK.P	56.1885	50.0351	53.8699	21.0327	22.3622	20.2209	27.2345	29.5743	28.2259	12.8225	11.9302	10.2342
sp|Q12449|AHA1_YEAST	AHA1	Hsp90 co-chaperone AHA1	0	U	K.NALPSSTSTSAPVSSTNK.V	147.396	142.847	171.379	54.2219	63.3557	57.9856	89.3756	87.0334	89.6762	27.6716	34.0434	35.5408
sp|Q12449|AHA1_YEAST	AHA1	Hsp90 co-chaperone AHA1	0	U	R.ANFEEYYVR.S	38.7485	37.1474	42.8289	16.0532	16.7364	18.6398	28.5798	28.2035	21.5836	7.50317	11.4831	15.1431
sp|Q12449|AHA1_YEAST	AHA1	Hsp90 co-chaperone AHA1	0	U	K.NALPSSTSTSAPVSSTNK.V	85.9701	100.116	105.687	35.0217	35.7677	41.9428	55.6711	49.1377	61.2397	18.6885	21.0861	18.822
sp|Q12449|AHA1_YEAST	AHA1	Hsp90 co-chaperone AHA1	0	U	K.NALPSSTSTSAPVSSTNK.V	113.544	112.269	112.252	40.4071	46.4104	43.5376	60.6829	57.1271	63.4907	19.3669	20.9236	19.319
sp|Q12449|AHA1_YEAST	AHA1	Hsp90 co-chaperone AHA1	0	U	R.SAQFFNSGPK.L	464.56	451.279	451.55	166.497	163.357	173.681	279.454	285.847	293.953	89.4082	97.2921	103.379
sp|Q12449|AHA1_YEAST	AHA1	Hsp90 co-chaperone AHA1	0	U	K.WTGIPVGEEDR.V	31.3989	27.9786	31.0355	12.9708	13.3783	11.9366	18.42	22.0509	12.1563	9.50327	7.94317	3.77599
sp|Q12449|AHA1_YEAST	AHA1	Hsp90 co-chaperone AHA1	0	U	K.DLLATHGNDIQVPESQVK.S	129.242	128.174	121.884	65.7119	69.6336	61.9573	69.3379	74.8329	70.9592	34.0299	33.4454	30.5857
sp|Q12449|AHA1_YEAST	AHA1	Hsp90 co-chaperone AHA1	0	U	K.NALPSSTSTSAPVSSTNK.V	215.237	230.904	225.624	90.8172	96.2108	95.1907	116.845	133.208	137.317	55.8474	62.2589	55.8435
sp|Q12449|AHA1_YEAST	AHA1	Hsp90 co-chaperone AHA1	0	U	K.NALPSSTSTSAPVSSTNK.V	146.451	141.001	147.612	73.9392	65.1299	58.2017	87.7403	94.7077	92.7644	31.9426	33.6914	32.5303
sp|Q12449|AHA1_YEAST	AHA1	Hsp90 co-chaperone AHA1	0	U	K.LVGVEAGSVK.D	274.997	301.752	252.474	107.526	118.92	125.853	168.551	167.659	160.314	71.9015	60.299	59.8025
sp|Q12449|AHA1_YEAST	AHA1	Hsp90 co-chaperone AHA1	0	U	K.LVGVEAGSVK.D	870.474	931.321	914.43	507.956	522.747	571.769	612.577	619.583	558.964	299.151	313.957	324.632
sp|Q12449|AHA1_YEAST	AHA1	Hsp90 co-chaperone AHA1	0	U	R.QIFQQFGK.D	278.296	281.761	287.243	109.678	118.662	117.629	162.04	152.791	167.498	63.0548	51.5541	65.1527
sp|Q12449|AHA1_YEAST	AHA1	Hsp90 co-chaperone AHA1	0	U	K.SSFTEIK.D	54.5539	45.9051	46.8754	22.6707	19.8812	17.5104	24.085	27.4477	23.7939	12.0806	10.4462	10.0441
sp|Q12449|AHA1_YEAST	AHA1	Hsp90 co-chaperone AHA1	0	U	R.QIFQQFGK.D	78.9111	76.47	80.7393	39.5259	36.4536	41.6162	48.1487	53.2328	46.5452	22.3972	20.5341	24.2862
sp|Q12449|AHA1_YEAST	AHA1	Hsp90 co-chaperone AHA1	0	U	K.SSFTEIK.D	83.9538	77.2438	85.3188	44.1675	31.9267	41.3154	48.8799	42.1461	47.7226	14.295	17.7309	15.3406
sp|Q12433|AHC1_YEAST	AHC1	Protein AHC1	0	U	K.SPQDLENNMDEPFK.M	23.1156	20.8806	15.277	27.7998	23.6804	22.5639	44.1984	51.0539	38.3974	49.8512	47.529	45.7077
sp|Q12433|AHC1_YEAST	AHC1	Protein AHC1	0	U	K.LIDMVNETPDDLNEYLK.Q	7.78323	9.90104	7.71076	8.84796	7.33439	9.11592	14.5099	11.8579	15.1677	13.1393	11.4964	12.1447
sp|P38013|AHP1_YEAST	AHP1	Peroxiredoxin AHP1	0	U	K.EVDQVIVVTVDNPFANQAWAK.S	39.9908	47.9925	43.1637	16.9106	25.4135	23.4296	26.2744	31.3342	30.9397	40.2162	44.8967	40.6685
sp|P38013|AHP1_YEAST	AHP1	Peroxiredoxin AHP1	0	U	K.EVDQVIVVTVDNPFANQAWAK.S	91.1506	91.191	81.6748	52.2446	51.1667	45.29	63.0499	73.1283	61.3283	108.456	114.619	122.518
sp|P38013|AHP1_YEAST	AHP1	Peroxiredoxin AHP1	0	U	K.FPAGDYK.F	22.4848	20.5107	21.944	5.82018	12.3464	8.12309	14.9979	13.4779	12.6035	21.5981	26.1865	18.3636
sp|P38013|AHP1_YEAST	AHP1	Peroxiredoxin AHP1	0	U	K.FPAGDYK.F	264.512	296.252	279.878	138.266	129.813	141.33	171.697	186.146	149.068	364.895	336.457	309.305
sp|P38013|AHP1_YEAST	AHP1	Peroxiredoxin AHP1	0	U	K.M*PQTVEWSK.L	229.298	234.363	243.965	142.923	174.558	152.384	150.987	165.803	169.433	307.838	297.18	317.853
sp|P38013|AHP1_YEAST	AHP1	Peroxiredoxin AHP1	0	U	K.FPAGDYK.F	747.762	872.837	814.693	388.615	446.389	460.944	548.743	567.771	473.923	1041.31	951.48	904.352
sp|P38013|AHP1_YEAST	AHP1	Peroxiredoxin AHP1	0	U	K.MPQTVEWSK.L	28.8282	29.3702	28.5404	23.0042	21.9781	28.1298	21.4446	19.1016	15.8305	31.5628	30.125	23.9287
sp|P38013|AHP1_YEAST	AHP1	Peroxiredoxin AHP1	0	U	K.ETNPGTDVTVSSVESVLAHL.-	19.8493	25.887	36.1298	20.4668	23.4866	25.8733	25.7196	27.2933	34.0774	40.4631	40.0108	43.2574
sp|P38013|AHP1_YEAST	AHP1	Peroxiredoxin AHP1	0	U	K.ETNPGTDVTVSSVESVLAHL.-	83.0576	112.107	78.106	58.4916	48.2975	42.9461	79.5696	92.0702	75.5866	133.559	145.482	158.453
sp|P38013|AHP1_YEAST	AHP1	Peroxiredoxin AHP1	0	U	K.FPAGDYK.F	286.941	340.687	304.905	138.058	165.467	169.407	192.682	220.696	163.685	356.847	349.89	322.545
sp|P38013|AHP1_YEAST	AHP1	Peroxiredoxin AHP1	0	U	R.WAM*VVENGIVTYAAK.E	245.445	113.008	125.576	39.1011	69.0413	37.5764	62.1366	62.0754	64.908	63.2801	73.6537	86.7201
sp|P38013|AHP1_YEAST	AHP1	Peroxiredoxin AHP1	0	U	R.WAM*VVENGIVTYAAK.E	121.344	65.2388	66.3798	25.2027	53.5368	28.7363	43.6095	33.4929	44.4117	42.8183	51.9689	50.8502
sp|P38013|AHP1_YEAST	AHP1	Peroxiredoxin AHP1	0	U	R.WAM*VVENGIVTYAAK.E	617.737	265.057	298.218	83.3288	164.063	72.7625	160.838	133.336	173.847	165.659	202.629	235.497
sp|P38013|AHP1_YEAST	AHP1	Peroxiredoxin AHP1	0	U	K.KFPAGDYK.F	49.7146	44.4645	48.617	35.1935	39.2014	31.1113	39.7335	40.5608	34.737	62.3158	69.0748	60.8909
sp|P38013|AHP1_YEAST	AHP1	Peroxiredoxin AHP1	0	U	K.KFPAGDYK.F	60.3848	53.8824	48.5182	38.6676	35.9416	30.5045	32.6724	33.1769	37.3593	61.8546	65.7462	67.4489
sp|P38013|AHP1_YEAST	AHP1	Peroxiredoxin AHP1	0	U	K.KFPAGDYK.F	12.2669	24.2235	17.2944	11.8652	11.8219	9.9994	10.8987	11.348	11.6972	19.3142	21.5597	19.7634
sp|P38013|AHP1_YEAST	AHP1	Peroxiredoxin AHP1	0	U	K.FPAGDYK.F	72.5102	69.7219	82.945	40.1276	50.9779	45.9455	47.1096	47.5981	51.6471	82.3857	82.87	82.4999
sp|P38013|AHP1_YEAST	AHP1	Peroxiredoxin AHP1	0	U	K.MPQTVEWSK.L	347.651	354.363	338.955	219.425	221.43	216.401	274.535	296.349	294.56	510.316	468.833	463.77
sp|P38013|AHP1_YEAST	AHP1	Peroxiredoxin AHP1	0	U	K.FPAGDYK.F	144.264	137.492	150.436	67.4631	87.2051	84.6399	78.4058	86.7635	82.6414	153.435	163.897	159.225
sp|P38013|AHP1_YEAST	AHP1	Peroxiredoxin AHP1	0	U	K.FPAGDYK.F	200.433	220.218	220.611	110.693	126.804	125.607	134.656	139.498	121.64	261.906	226.453	214.329
sp|P38013|AHP1_YEAST	AHP1	Peroxiredoxin AHP1	0	U	K.M*PQTVEWSK.L	17.7098	17.1959	12.4402	5.09603	6.23696	6.13459	9.25842	11.239	5.75895	19.199	19.5908	11.2621
sp|P38013|AHP1_YEAST	AHP1	Peroxiredoxin AHP1	0	U	K.EVDQVIVVTVDNPFANQAWAK.S	258.257	246.266	227.285	157.888	152.446	150.284	181.794	192.408	186.593	312.46	323.483	347.035
sp|P38013|AHP1_YEAST	AHP1	Peroxiredoxin AHP1	0	U	R.WAM*VVENGIVTYAAK.E	227.735	108.235	124.954	44.938	76.0336	45.1248	68.5723	57.562	60.107	69.9063	74.3524	86.1788
sp|P38013|AHP1_YEAST	AHP1	Peroxiredoxin AHP1	0	U	K.M*PQTVEWSK.L	13.414	14.1463	15.3456	5.66918	4.7658	3.84399	7.77087	7.24861	6.12631	10.6069	9.30701	10.9887
sp|P38013|AHP1_YEAST	AHP1	Peroxiredoxin AHP1	0	U	R.WAM*VVENGIVTYAAK.E	26.0698	24.2622	23.1513	10.8374	14.4576	14.2348	10.864	10.9725	13.696	23.8602	23.5498	28.1126
sp|P38013|AHP1_YEAST	AHP1	Peroxiredoxin AHP1	0	U	R.WAM*VVENGIVTYAAK.E	30.8962	26.2513	26.5259	15.0058	18.046	20.5667	17.4055	13.7728	17.4309	27.2122	31.2171	40.6617
sp|P38013|AHP1_YEAST	AHP1	Peroxiredoxin AHP1	0	U	K.M*PQTVEWSK.L	176.241	165.426	171.229	109.628	125.43	111.97	112.544	116.441	117.156	202.256	185.516	186.317
sp|P38013|AHP1_YEAST	AHP1	Peroxiredoxin AHP1	0	U	K.M*PQTVEWSK.L	159.953	176.191	169.864	99.7131	109.636	100.468	114.195	126.007	109.574	182.744	192.833	189.488
sp|P38013|AHP1_YEAST	AHP1	Peroxiredoxin AHP1	0	U	K.MPQTVEWSK.L	143.483	145.846	150.501	90.6209	109.345	118.616	114.253	105.179	100.6	186.89	171.573	155.274
sp|P38013|AHP1_YEAST	AHP1	Peroxiredoxin AHP1	0	U	R.WAMVVENGIVTYAAK.E	52.6702	49.7871	47.335	33.9405	35.5753	36.974	40.8719	44.7866	41.7252	49.9513	63.9167	73.9431
sp|P03875|AI1M_YEAST	AI1	Putative COX1/OXI3 intron 1 protein	0	U	R.TIINNYK.A	40.7263	28.4898	31.1251	46.7712	37.0932	40.5579	114.221	121.065	90.0034	128.278	121.843	129.866
sp|P03875|AI1M_YEAST	AI1	Putative COX1/OXI3 intron 1 protein	0	U	K.LSNELGTGK.F	141.717	224.266	194.878	152.591	205.091	179.416	207.45	293.754	158.127	276.845	238.66	149.338
sp|P03875|AI1M_YEAST	AI1	Putative COX1/OXI3 intron 1 protein	0	U	R.TIINNYK.A	34.5073	36.2078	39.6597	52.9276	59.0651	55.2714	169.37	171.405	135.25	197.803	187.008	194.689
sp|P03875|AI1M_YEAST	AI1	Putative COX1/OXI3 intron 1 protein	0	U	K.GFIDLVYK.L	21.1472	17.2497	29.3418	22.9932	17.5294	16.8618	46.5582	37.4961	44.3116	30.4875	25.0412	28.526
sp|P03877|SCE3_YEAST	AI3	Intron-encoded DNA endonuclease aI3	0	U	K.HLDFLDWSK.L	47.4316	38.7766	48.8155	13.8332	15.8956	19.3702	19.5892	25.738	21.2721	10.4111	9.11376	11.5128
sp|P03878|SCE2_YEAST	AI4	Intron-encoded DNA endonuclease aI4	0	U	K.NILGGNIYFDK.S	35.9489	35.0576	36.0197	28.8102	36.1696	25.5604	48.4916	54.3649	47.0637	50.1328	43.7553	47.8499
sp|P52923|AIF1_YEAST	AIF1	Apoptosis-inducing factor 1	0	U	K.NVTDYLSK.N	7.16532	11.3101	12.9397	127.273	137.222	133.833	4.95279	4.38712	0	182.036	168.672	165.938
sp|P52923|AIF1_YEAST	AIF1	Apoptosis-inducing factor 1	0	U	K.YIDADLIYR.G	0	0	1.86651	44.64	40.372	36.6023	3.51604	0	0	57.06	56.8055	59.0737
sp|P52923|AIF1_YEAST	AIF1	Apoptosis-inducing factor 1	0	U	R.DNWVDVLTR.N	0.0104239	0	0	75.3902	76.158	64.3239	0	1.07113	0	132.45	126.033	129.569
sp|P52923|AIF1_YEAST	AIF1	Apoptosis-inducing factor 1	0	U	K.AVEAGNVFAIGDVTNFR.Y	0	0	1.57803	39.1822	47.9457	40.2739	0	0	0	68.2854	82.4037	78.7569
sp|P39965|SYPM_YEAST	AIM10	Probable proline--tRNA ligase, mitochondrial	0	U	K.SIEVGHIFLLGNK.Y	149.432	137.242	166.572	118.551	114.317	123.625	108.091	94.1533	110.072	62.5074	69.751	81.1486
sp|P39965|SYPM_YEAST	AIM10	Probable proline--tRNA ligase, mitochondrial	0	U	R.NKPNDHVLQVYEK.D	297.022	283.891	268.227	242.856	233.29	236.576	165.528	179.568	173.243	116.942	112.679	115.69
sp|P39965|SYPM_YEAST	AIM10	Probable proline--tRNA ligase, mitochondrial	0	U	K.DIDLTLR.N	67.0998	59.3931	59.3792	47.12	50.5868	54.2265	43.0463	33.706	41.0028	27.4061	31.0281	31.2379
sp|P39965|SYPM_YEAST	AIM10	Probable proline--tRNA ligase, mitochondrial	0	U	R.LVGAIAELGR.D	15.6063	21.6721	18.8862	8.65672	10.2434	12.6132	9.3474	8.17567	8.02899	8.26693	6.06076	5.0792
sp|P39965|SYPM_YEAST	AIM10	Probable proline--tRNA ligase, mitochondrial	0	U	K.SNFPDFPLK.K	74.485	78.313	74.2972	54.77	56.1517	59.3659	41.9547	46.8705	49.4165	39.185	44.0118	41.2832
sp|P39965|SYPM_YEAST	AIM10	Probable proline--tRNA ligase, mitochondrial	0	U	K.DAYSFASNEEDAFASFQK.L	704.357	714.011	716.269	586.274	557.181	573.896	410.807	406.636	455.11	267.318	284.188	271.378
sp|P39965|SYPM_YEAST	AIM10	Probable proline--tRNA ligase, mitochondrial	0	U	K.LDDTYNK.I	133.278	158.546	164.096	108.843	113.16	117.359	89.6733	79.2786	95.263	60.8682	55.229	49.6092
sp|P39965|SYPM_YEAST	AIM10	Probable proline--tRNA ligase, mitochondrial	0	U	K.ALWQATDR.W	57.5026	57.7641	74.5135	48.7556	35.7044	32.2321	39.7262	33.3116	44.5327	23.8491	25.3309	25.4562
sp|P39965|SYPM_YEAST	AIM10	Probable proline--tRNA ligase, mitochondrial	0	U	R.MDSDGGAIEVSLSAISSK.A	60.3011	62.7793	58.9525	47.0268	49.1827	42.038	47.7054	49.222	47.2021	36.0176	37.6618	38.0145
sp|P39965|SYPM_YEAST	AIM10	Probable proline--tRNA ligase, mitochondrial	0	U	K.SNFPDFPLK.K	397.071	363.808	378.161	250.516	283.927	266.593	176.664	185.042	199.577	118.882	115.285	120.785
sp|P39965|SYPM_YEAST	AIM10	Probable proline--tRNA ligase, mitochondrial	0	U	R.WPAIMAPYK.V	85.8908	92.0495	96.1005	74.4899	66.3994	69.8248	61.7445	60.1064	64.1811	43.3656	41.6735	47.8748
sp|P39965|SYPM_YEAST	AIM10	Probable proline--tRNA ligase, mitochondrial	0	U	R.WPAIMAPYK.V	69.895	77.7322	83.8842	58.2379	54.4626	58.8569	47.3816	44.3622	45.9789	39.5556	31.0728	30.8017
sp|P39965|SYPM_YEAST	AIM10	Probable proline--tRNA ligase, mitochondrial	0	U	K.SLSNNTLK.S	62.2193	59.0186	44.2868	37.246	44.2725	39.6531	34.9665	36.0886	37.4747	24.6283	30.1676	29.1767
sp|P39965|SYPM_YEAST	AIM10	Probable proline--tRNA ligase, mitochondrial	0	U	K.SWPNVEIEVR.G	31.351	30.096	26.7065	18.8885	22.5361	19.0646	17.2156	14.5863	13.7493	16.1578	10.7215	7.79434
sp|P87275|AIM11_YEAST	AIM11	Altered inheritance of mitochondria protein 11	0	U	K.YVPSIFQQNYK.L	177.104	189.234	164.407	196.442	180.42	183.839	103.616	109.3	117.497	69.1173	79.8604	64.8929
sp|P87275|AIM11_YEAST	AIM11	Altered inheritance of mitochondria protein 11	0	U	K.YVPSIFQQNYK.L	113.257	112.486	117.976	137.993	122.223	130.552	70.3983	65.1138	64.1735	38.7678	43.8731	48.554
sp|P87275|AIM11_YEAST	AIM11	Altered inheritance of mitochondria protein 11	0	U	K.YVPSIFQQNYK.L	517.245	527.049	535.526	606.6	577.703	620.186	354.736	313.416	359.558	213.501	203.534	235.907
sp|P87275|AIM11_YEAST	AIM11	Altered inheritance of mitochondria protein 11	0	U	K.QLQDLLSSENNK.-	228.635	218.602	231.619	222.623	212.101	207.341	176.956	190.123	187.729	123.879	113.802	128.853
sp|P53109|AIM14_YEAST	AIM14	Probable metalloreductase AIM14	0	U	K.SLMILNK.N	161.71	175.865	183.722	59.4666	62.1853	68.964	85.18	81.3021	84.2059	64.2933	62.9236	54.29
sp|P53109|AIM14_YEAST	AIM14	Probable metalloreductase AIM14	0	U	K.DYSEYELVLDYLK.T	100.123	97.0857	93.8083	38.0154	36.1273	26.3854	33.5701	40.7418	25.9281	17.6001	22.4652	20.0825
sp|P53109|AIM14_YEAST	AIM14	Probable metalloreductase AIM14	0	U	K.ESPLITLVK.R	66.9948	64.4502	63.5658	47.3491	44.4982	39.5336	86.1844	90.1817	81.1486	66.7094	64.0982	64.3305
sp|P23180|AIM17_YEAST	AIM17	Probable oxidoreductase AIM17	0	U	K.LFQTLVNLQK.F	20.4302	18.9893	21.1493	18.4192	19.9968	22.7769	10.5762	8.32235	4.78215	9.02256	6.20343	11.3249
sp|P23180|AIM17_YEAST	AIM17	Probable oxidoreductase AIM17	0	U	K.DLLSVSYNEFIDPK.D	135.003	144.449	142.203	183.715	207.679	182.615	31.2204	28.8946	33.5573	39.7905	40.62	35.2222
sp|P23180|AIM17_YEAST	AIM17	Probable oxidoreductase AIM17	0	U	R.GLNLFESHINDFNNQFR.L	83.4243	94.5161	83.8815	108.083	113.573	110.967	28.3208	21.994	22.9585	18.4824	25.763	24.7922
sp|P23180|AIM17_YEAST	AIM17	Probable oxidoreductase AIM17	0	U	R.STVHGEGTFDVNASQATSVNAHYANK.D	128.103	104.278	121.599	333.617	190.817	193.787	36.1452	24.3436	43.261	34.5769	37.9447	59.5113
sp|P23180|AIM17_YEAST	AIM17	Probable oxidoreductase AIM17	0	U	R.STVHGEGTFDVNASQATSVNAHYANK.D	122.016	79.7533	95.0749	276.543	186.411	185.401	24.8552	18.2538	39.9094	28.7419	33.6584	51.1868
sp|P23180|AIM17_YEAST	AIM17	Probable oxidoreductase AIM17	0	U	K.LTAPQDIQISEDGK.S	235	228.354	244.402	308.253	308.715	314.412	45.5817	37.7049	56.3177	56.5277	59.136	46.1355
sp|P23180|AIM17_YEAST	AIM17	Probable oxidoreductase AIM17	0	U	K.LTAPQDIQISEDGK.S	29.2979	25.9244	25.6995	41.2478	42.0173	35.1138	6.81868	8.73558	10.5461	9.78251	9.20564	9.19215
sp|P23180|AIM17_YEAST	AIM17	Probable oxidoreductase AIM17	0	U	K.LFQTLVNLQK.F	16.6678	15.0227	18.3872	24.1575	20.539	17.4025	9.81105	12.0692	13.7621	8.28222	9.42569	11.4094
sp|P23180|AIM17_YEAST	AIM17	Probable oxidoreductase AIM17	0	U	K.LFQTLVNLQK.F	242.08	269.818	246.708	330.742	330.375	344.29	50.225	44.4101	58.2035	76.685	58.3712	79.343
sp|P23180|AIM17_YEAST	AIM17	Probable oxidoreductase AIM17	0	U	K.LFQTLVNLQK.F	20.3293	20.6886	21.9377	24.1033	26.4119	28.5259	9.46684	7.76419	9.58495	3.9827	12.2134	13.486
sp|P23180|AIM17_YEAST	AIM17	Probable oxidoreductase AIM17	0	U	K.LFQTLVNLQK.F	39.1208	44.7748	40.7978	52.6212	54.8997	54.9747	13.8468	13.1895	21.6509	17.3335	19.1285	17.743
sp|P23180|AIM17_YEAST	AIM17	Probable oxidoreductase AIM17	0	U	R.ILHANSLTSSNQQWLK.G	40.7868	31.9686	37.202	70.6126	47.7959	49.7785	10.3187	6.2548	14.6458	9.55893	13.1669	16.251
sp|P23180|AIM17_YEAST	AIM17	Probable oxidoreductase AIM17	0	U	K.LFQTLVNLQK.F	88.7215	82.3556	92.3476	113.406	113.231	99.5585	17.3803	28.1914	22.5113	34.7435	31.1746	31.8771
sp|P23180|AIM17_YEAST	AIM17	Probable oxidoreductase AIM17	0	U	K.LFQTLVNLQK.F	268.684	283.069	276.881	343.939	357.063	374.415	85.7992	89.4934	94.4396	108.097	93.7405	102.149
sp|P23180|AIM17_YEAST	AIM17	Probable oxidoreductase AIM17	0	U	K.GSSFVSPATR.K	104.094	115.45	115.101	173.453	169.743	163.542	22.6815	18.0886	23.0865	26.2342	28.5137	31.418
sp|P23180|AIM17_YEAST	AIM17	Probable oxidoreductase AIM17	0	U	K.DGGHHQFPLQFFIDYK.G	691.64	616.634	644.812	1110.87	971.232	1059.08	132.956	124.786	139.377	172.747	173.86	187.518
sp|P23180|AIM17_YEAST	AIM17	Probable oxidoreductase AIM17	0	U	K.DGGHHQFPLQFFIDYK.G	101.315	81.7902	87.3422	135.096	128.164	147.441	22.5047	19.0041	22.6552	29.4387	26.4581	27.9484
sp|P23180|AIM17_YEAST	AIM17	Probable oxidoreductase AIM17	0	U	R.ILHANSLTSSNQQWLK.G	92.9253	71.8556	86.1151	153.15	101	105.765	25.3195	32.8629	43.8542	29.1053	38.3707	46.3928
sp|P23180|AIM17_YEAST	AIM17	Probable oxidoreductase AIM17	0	U	K.LTAPQDIQISEDGK.S	23.9801	28.8509	25.6139	33.4962	41.1773	38.3522	8.15712	7.81687	3.23659	7.52067	8.6561	6.73143
sp|P23180|AIM17_YEAST	AIM17	Probable oxidoreductase AIM17	0	U	K.LVTTGELYHNEK.L	438.656	424.08	401.064	614.84	588.565	630.407	84.6389	100.874	106.759	120.476	106.819	111.437
sp|P23180|AIM17_YEAST	AIM17	Probable oxidoreductase AIM17	0	U	K.DLLSVSYNEFIDPK.D	48.6424	38.9589	41.8571	55.8643	59.8835	62.7614	6.45307	5.67353	8.98333	6.07009	7.09475	4.51908
sp|P23180|AIM17_YEAST	AIM17	Probable oxidoreductase AIM17	0	U	K.DLLSVSYNEFIDPK.D	23.8788	22.933	30.6905	38.2579	39.7642	36.6363	5.15989	7.31107	4.63657	0	6.35431	5.93666
sp|P38884|AIM18_YEAST	AIM18	Altered inheritance of mitochondria protein 18, mitochondrial	0	U	K.NNEFEVMGVVNNQLVGK.F	345.743	405.921	374.262	226.888	248.352	248.222	219.921	232.175	211.679	147.678	157.759	151.112
sp|P38884|AIM18_YEAST	AIM18	Altered inheritance of mitochondria protein 18, mitochondrial	0	U	K.GLSELNDAFSR.K	92.8858	96.3011	105.823	64.0969	59.6433	67.5767	40.0986	36.733	41.3514	25.6256	23.9932	25.7786
sp|P38884|AIM18_YEAST	AIM18	Altered inheritance of mitochondria protein 18, mitochondrial	0	U	K.YFLDVDDSK.T	252.926	237.116	242.287	149.192	145.135	164.059	94.7231	81.5004	77.4823	66.4203	52.9932	56.1186
sp|P38884|AIM18_YEAST	AIM18	Altered inheritance of mitochondria protein 18, mitochondrial	0	U	K.YFLDVDDSK.T	97.4318	107.466	117.833	61.9526	61.3191	58.8197	30.899	35.3486	38.6136	25.4371	22.6204	25.3328
sp|P38884|AIM18_YEAST	AIM18	Altered inheritance of mitochondria protein 18, mitochondrial	0	U	K.YFLDVDDSK.T	121.876	123.567	127.355	82.5236	70.493	79.4982	39.0005	42.6168	37.3893	30.4953	34.1424	30.1271
sp|P38884|AIM18_YEAST	AIM18	Altered inheritance of mitochondria protein 18, mitochondrial	0	U	K.SVMMIDDLLDSGM*R.M	23.7501	21.1071	17.0162	7.40591	14.0528	11.3378	7.49091	3.12912	4.34265	2.4218	5.66716	3.01182
sp|P38884|AIM18_YEAST	AIM18	Altered inheritance of mitochondria protein 18, mitochondrial	0	U	K.YFLDVDDSK.T	96.0471	101.123	90.5324	55.0076	65.9336	54.5235	35.2163	35.7666	32.1373	16.4178	30.4858	23.7474
sp|P38884|AIM18_YEAST	AIM18	Altered inheritance of mitochondria protein 18, mitochondrial	0	U	K.YFLDVDDSK.T	192.365	188.663	218.428	121.09	124.276	138.589	72.8511	65.3186	64.594	43.4955	47.024	44.9065
sp|P38884|AIM18_YEAST	AIM18	Altered inheritance of mitochondria protein 18, mitochondrial	0	U	K.LLGYGQR.H	84.363	94.3357	96.8568	42.2062	51.1754	48.8935	41.8755	47.1123	37.7489	28.887	29.6096	41.3329
sp|P38884|AIM18_YEAST	AIM18	Altered inheritance of mitochondria protein 18, mitochondrial	0	U	K.GLSELNDAFSR.K	59.3559	62.0319	58.4194	62.0877	67.8273	70.4104	28.2075	31.2517	24.8074	22.0129	22.6294	24.8934
sp|P38884|AIM18_YEAST	AIM18	Altered inheritance of mitochondria protein 18, mitochondrial	0	U	K.GLSELNDAFSR.K	33.3001	32.9368	32.3793	23.8266	22.3799	24.737	13.2624	15.0215	14.9764	14.4546	15.0096	11.0303
sp|P38884|AIM18_YEAST	AIM18	Altered inheritance of mitochondria protein 18, mitochondrial	0	U	K.HPDVANNK.D	330.24	313.336	326.806	224.094	217.502	209.602	115.615	102.907	112.47	74.7975	81.2132	69.4162
sp|P38884|AIM18_YEAST	AIM18	Altered inheritance of mitochondria protein 18, mitochondrial	0	U	K.GLSELNDAFSR.K	41.6236	43.8072	48.3053	32.7056	30.7291	29.0021	21.404	18.4592	17.5031	18.1167	20.475	23.8785
sp|P40502|AIM19_YEAST	AIM19	Altered inheritance of mitochondria protein 19, mitochondrial	0	U	R.FLATGFQ.-	347.752	334.41	345.065	225.805	244.364	232.072	45.1452	50.307	48.5982	35.0095	40.6127	36.5387
sp|P40502|AIM19_YEAST	AIM19	Altered inheritance of mitochondria protein 19, mitochondrial	0	U	R.FLATGFQ.-	477.094	545.18	528.038	350.738	357.461	359.748	65.2039	72.3891	93.8588	64.9596	55.9457	52.6331
sp|P40502|AIM19_YEAST	AIM19	Altered inheritance of mitochondria protein 19, mitochondrial	0	U	R.FLATGFQ.-	34.1893	41.7494	33.2278	28.4361	28.3091	25.937	9.58797	5.19547	8.1629	8.4254	6.4717	5.25251
sp|P40502|AIM19_YEAST	AIM19	Altered inheritance of mitochondria protein 19, mitochondrial	0	U	R.TPYPALANAALLASTPVLSPSFK.V	72.9591	74.0907	88.8265	71.1198	60.985	57.9362	8.1286	10.0187	11.8643	8.96126	8.03297	5.51365
sp|P40502|AIM19_YEAST	AIM19	Altered inheritance of mitochondria protein 19, mitochondrial	0	U	K.VPPTQSPALSIPMSR.V	35.2696	30.769	32.6348	31.1933	24.0353	26.7212	6.09389	5.62147	8.07938	4.11725	6.92202	4.1181
sp|P39721|AIM2_YEAST	AIM2	Protein AIM2	0	U	K.FASAGYMVFVPDILFGDAISSDKPIDR.D	133.388	115.376	120.016	150.656	128.258	127.29	41.9493	43.538	49.0729	38.4689	42.9575	49.1972
sp|P39721|AIM2_YEAST	AIM2	Protein AIM2	0	U	K.VIVILTDVYGNK.F	404.569	397.291	366.989	428.509	398.385	421.822	119.247	130.542	132.008	107.46	108.988	121.913
sp|P39721|AIM2_YEAST	AIM2	Protein AIM2	0	U	K.IVDGFMK.L	248.265	250.398	257.347	277.768	287.694	275.362	76.9608	81.8771	85.7226	89.9531	89.9407	84.2106
sp|P39721|AIM2_YEAST	AIM2	Protein AIM2	0	U	R.EEIFGLDTYAAGSTSPK.E	53.0947	62.4853	45.8682	61.726	55.5083	61.1239	15.8912	16.4658	16.1113	20.0934	22.3469	16.5522
sp|P39721|AIM2_YEAST	AIM2	Protein AIM2	0	U	K.FNNVLLTADK.F	143.317	128.404	144.953	149.231	141.4	150.313	34.8659	34.2601	42.2408	38.1973	30.9428	37.1097
sp|P39721|AIM2_YEAST	AIM2	Protein AIM2	0	U	R.REEIFGLDTYAAGSTSPK.E	14.2958	15.1228	14.3549	15.8232	18.5144	18.4786	6.97312	5.84	4.10559	7.25977	5.79593	6.68203
sp|P39721|AIM2_YEAST	AIM2	Protein AIM2	0	U	R.REEIFGLDTYAAGSTSPK.E	23.957	26.2864	25.9648	28.4458	36.126	31.2912	5.01473	8.0851	8.11203	4.20775	7.3183	8.03551
sp|P39721|AIM2_YEAST	AIM2	Protein AIM2	0	U	R.REEIFGLDTYAAGSTSPK.E	82.5576	96.8917	72.789	99.1581	103.787	101.033	40.1647	34.9186	35.848	27.721	25.2285	25.9779
sp|P39721|AIM2_YEAST	AIM2	Protein AIM2	0	U	K.FNNVLLTADK.F	116.532	120.218	156.71	138.799	133.224	134.37	51.0689	41.6299	30.1344	37.2134	37.9097	41.9488
sp|P39721|AIM2_YEAST	AIM2	Protein AIM2	0	U	R.GDISIPAVK.Y	564.623	576.623	546.896	625.107	657.415	610.781	169.697	196.679	192.622	181.362	175.281	174.761
sp|P39721|AIM2_YEAST	AIM2	Protein AIM2	0	U	R.HSPEVTK.K	593.478	593.197	616.873	674.897	701.1	697.938	198.492	184.253	192.01	184.302	167.285	186.747
sp|P39721|AIM2_YEAST	AIM2	Protein AIM2	0	U	K.IVDGFM*K.L	79.3837	74.5021	72.0129	84.2971	69.6833	84.1259	24.1203	18.905	23.729	20.7606	21.7525	16.5702
sp|P39721|AIM2_YEAST	AIM2	Protein AIM2	0	U	R.EEIFGLDTYAAGSTSPK.E	31.3082	29.1056	36.9142	33.5919	33.1746	29.7284	10.3713	6.93359	13.6511	11.1457	9.86104	9.47468
sp|P39721|AIM2_YEAST	AIM2	Protein AIM2	0	U	R.GDISIPAVK.Y	99.6764	118.052	112.412	112.805	112.313	118.824	27.8457	42.05	45.008	34.5971	33.9611	39.498
sp|P39721|AIM2_YEAST	AIM2	Protein AIM2	0	U	K.VIVILTDVYGNK.F	259.616	282.356	272.674	296.691	292.163	296.977	90.7735	88.6726	87.577	77.2591	95.9327	90.3137
sp|P40563|AIM21_YEAST	AIM21	Altered inheritance of mitochondria protein 21	0	U	R.IAAFQEMLQK.Q	312.334	324.666	332.658	278.218	273.758	280.039	349.451	368.817	384.43	284.573	269.608	286.153
sp|P40563|AIM21_YEAST	AIM21	Altered inheritance of mitochondria protein 21	0	U	K.IPSERPK.R	346.796	324.293	351.759	303.921	315.087	319.831	261.07	261.396	298.827	210.208	200.077	198.842
sp|P40563|AIM21_YEAST	AIM21	Altered inheritance of mitochondria protein 21	0	U	K.VLIDTTPGEQAER.A	96.8384	85.5025	100.989	77.2181	78.9111	72.4851	69.1457	74.3968	80.7437	54.4691	52.7002	56.5925
sp|P40563|AIM21_YEAST	AIM21	Altered inheritance of mitochondria protein 21	0	U	K.LIPGDMK.V	302.236	332.556	327.524	301.234	359.96	352.132	342.866	372.325	350.937	290.698	283.139	275.92
sp|P40563|AIM21_YEAST	AIM21	Altered inheritance of mitochondria protein 21	0	U	K.DVEEGSLNALPPSGITESDDK.A	13.5635	21.9744	10.5818	15.9051	19.735	17.4064	21.2639	18.8354	20.6201	11.5835	15.1446	12.6127
sp|P40563|AIM21_YEAST	AIM21	Altered inheritance of mitochondria protein 21	0	U	K.DVEEGSLNALPPSGITESDDK.A	32.3679	29.1186	28.5286	28.8524	26.9468	33.9821	32.0559	43.3407	31.7233	27.3899	31.5956	32.1337
sp|P40563|AIM21_YEAST	AIM21	Altered inheritance of mitochondria protein 21	0	U	K.DVEEGSLNALPPSGITESDDK.A	29.543	33.7595	27.455	36.2137	36.7172	34.5766	40.3675	48.6269	45.179	36.1039	39.8715	35.6442
sp|P40563|AIM21_YEAST	AIM21	Altered inheritance of mitochondria protein 21	0	U	K.EELPNTQEK.R	226.044	238.555	225.874	191.156	224.157	210.494	167.596	177.138	197.572	149.444	160.32	161.127
sp|P40563|AIM21_YEAST	AIM21	Altered inheritance of mitochondria protein 21	0	U	K.IFQNPTDEESTTSLNEK.Q	74.1454	74.7293	75.9246	80.357	83.2464	80.9363	182.952	202.081	212.706	186.433	190.867	164.166
sp|P40563|AIM21_YEAST	AIM21	Altered inheritance of mitochondria protein 21	0	U	K.AISEESLSPSEAIANR.D	9.75117	9.23807	6.7861	8.18292	10.4363	12.7746	13.6343	15.796	16.4309	13.9003	14.5904	13.7746
sp|P40563|AIM21_YEAST	AIM21	Altered inheritance of mitochondria protein 21	0	U	K.HQEQQEEK.I	17.7079	15.8213	21.267	21.7143	22.1621	24.1249	20.7144	25.3352	28.0514	19.622	25.4341	18.5814
sp|P40563|AIM21_YEAST	AIM21	Altered inheritance of mitochondria protein 21	0	U	K.VHAALDNEAGDR.S	97.1153	98.6629	108.931	106.294	111.45	117.116	115.261	116.304	125.237	95.1432	91.8952	103.4
sp|P40563|AIM21_YEAST	AIM21	Altered inheritance of mitochondria protein 21	0	U	K.HPESSLEELQK.H	94.5175	87.9697	81.5992	85.001	89.4088	88.635	149.854	144.785	162.597	115.917	112.442	121.975
sp|P40563|AIM21_YEAST	AIM21	Altered inheritance of mitochondria protein 21	0	U	K.HTDSSITSDTTK.A	27.2235	24.7309	25.5421	23.0914	20.0238	24.0836	20.1084	20.1882	28.1635	19.3355	20.67	23.9535
sp|P40563|AIM21_YEAST	AIM21	Altered inheritance of mitochondria protein 21	0	U	K.NEHEGAEGNESAISPSNLVNK.S	32.1388	19.9016	27.2684	27.7909	34.0019	27.8281	31.9961	26.1366	31.2963	22.5513	26.014	28.1947
sp|P40563|AIM21_YEAST	AIM21	Altered inheritance of mitochondria protein 21	0	U	R.DQNDTTEIQEQQMEDQMEVDMER.E	53.3571	56.0108	59.4344	47.1593	56.9158	51.239	45.8186	49.9803	56.4805	37.4169	34.671	39.0035
sp|P40563|AIM21_YEAST	AIM21	Altered inheritance of mitochondria protein 21	0	U	R.DQNDTTEIQEQQMEDQMEVDMER.E	100.92	96.2571	102.44	94.6428	97.8677	108.312	77.156	86.5025	87.6829	65.9546	80.8509	87.5942
sp|P40563|AIM21_YEAST	AIM21	Altered inheritance of mitochondria protein 21	0	U	K.ANSEPPTPAGTPNVPTR.R	31.0004	27.9276	31.2705	20.9941	24.5132	20.8444	59.2551	63.653	61.3907	59.4698	59.0748	53.9144
sp|P40563|AIM21_YEAST	AIM21	Altered inheritance of mitochondria protein 21	0	U	R.IAAFQEMLQK.Q	38.905	40.2187	30.319	29.4721	26.3552	31.7384	38.2849	37.5405	31.7768	30.7628	34.0394	36.2708
sp|P40563|AIM21_YEAST	AIM21	Altered inheritance of mitochondria protein 21	0	U	R.APPPVPK.K	276.952	256.622	249.445	227.537	231.943	240.575	167.482	186.735	180.479	129.245	150.854	138.752
sp|P40563|AIM21_YEAST	AIM21	Altered inheritance of mitochondria protein 21	0	U	R.IAAFQEMLQK.Q	15.1221	17.6765	10.7525	7.20715	18.2506	11.7508	10.1859	14.0484	18.7658	11.2473	11.6077	10.9543
sp|P47051|LPLA_YEAST	AIM22	Putative lipoate-protein ligase A	0	U	K.GFLENIDSYT.-	7.3218	10.7726	10.9991	33.0566	33.2669	34.6289	15.2508	14.123	15.6371	19.0387	24.2579	23.4133
sp|P47051|LPLA_YEAST	AIM22	Putative lipoate-protein ligase A	0	U	K.YHDINSMYENMFTPSNDNVSILQDEGK.S	6.08862	5.59908	3.82856	25.884	19.1841	18.8614	7.61022	7.06377	8.43368	11.3319	20.2848	16.4797
sp|P47051|LPLA_YEAST	AIM22	Putative lipoate-protein ligase A	0	U	K.YHDINSMYENMFTPSNDNVSILQDEGK.S	6.3653	3.88878	2.71847	15.7143	20.793	19.8756	5.67654	5.04443	5.62234	11.1538	10.9899	11.9356
sp|P47051|LPLA_YEAST	AIM22	Putative lipoate-protein ligase A	0	U	K.SDYDTTK.A	17.0189	11.2853	16.3648	64.1094	69.7443	62.6974	43.0545	35.179	38.1125	49.265	53.7145	53.0244
sp|P47015|AIM23_YEAST	AIM23	Altered inheritance of mitochondria protein 23, mitochondrial	0	U	R.AAVLETLK.E	33.697	33.2713	33.2915	23.4751	28.0428	26.6951	18.3269	18.3726	14.3605	13.5134	17.6569	14.1115
sp|P47015|AIM23_YEAST	AIM23	Altered inheritance of mitochondria protein 23, mitochondrial	0	U	R.AAVLETLK.E	85.5645	86.7575	78.9428	67.5113	64.0904	68.4434	39.2739	38.2011	39.699	42.7513	50.6912	45.3088
sp|P47015|AIM23_YEAST	AIM23	Altered inheritance of mitochondria protein 23, mitochondrial	0	U	R.DNASSTTDIFR.N	14.1175	16.0106	12.961	14.9216	16.6749	16.7165	4.42428	7.73584	6.39008	7.10412	4.40518	3.9397
sp|P47015|AIM23_YEAST	AIM23	Altered inheritance of mitochondria protein 23, mitochondrial	0	U	K.EIVSEYANDPVLLGNMNSK.M	252.781	250.045	254.655	221.317	211.243	191.159	129.722	121.125	126.133	86.0223	92.8171	105.733
sp|P47015|AIM23_YEAST	AIM23	Altered inheritance of mitochondria protein 23, mitochondrial	0	U	R.AAVLETLK.E	70.7331	67.7817	69.7601	64.0442	49.9176	51.8828	37.6954	45.933	41.4184	28.3898	36.0804	35.5146
sp|P47015|AIM23_YEAST	AIM23	Altered inheritance of mitochondria protein 23, mitochondrial	0	U	R.LPESVFQK.R	247.105	242.308	252.574	229.718	244.655	255.819	167.432	186.914	172.605	172.329	158.642	158.467
sp|P47015|AIM23_YEAST	AIM23	Altered inheritance of mitochondria protein 23, mitochondrial	0	U	R.LPESVFQK.R	569.996	540.184	568.046	542.753	541.086	564.266	370.738	368.807	357.093	315.644	306.715	329.9
sp|P47015|AIM23_YEAST	AIM23	Altered inheritance of mitochondria protein 23, mitochondrial	0	U	K.VTLYLDDK.N	293.002	282.787	291.885	226.055	259.286	235.659	142.515	139.84	159.655	102.72	103.11	93.3723
sp|P47015|AIM23_YEAST	AIM23	Altered inheritance of mitochondria protein 23, mitochondrial	0	U	K.EAANSVVSEIFK.K	16.8845	19.1316	18.0948	16.2684	20.5051	13.6298	11.3831	9.73686	10.0615	5.39209	9.36132	10.0138
sp|P47015|AIM23_YEAST	AIM23	Altered inheritance of mitochondria protein 23, mitochondrial	0	U	K.EAANSVVSEIFK.K	24.4409	22.8872	17.9031	12.6417	16.5483	20.7959	7.28708	7.94309	10.7032	8.17848	9.97022	6.43397
sp|P47127|AIM24_YEAST	AIM24	Altered inheritance of mitochondria protein 24, mitochondrial	0	U	R.QELHVEGAYVGDSSNDTVAPK.F	54.2014	56.097	48.4753	53.0255	66.6409	69.0952	26.0488	24.7189	16.7822	15.5115	18.3009	20.4824
sp|P47127|AIM24_YEAST	AIM24	Altered inheritance of mitochondria protein 24, mitochondrial	0	U	K.SNVNDNGVNLEK.Q	20.5733	28.4961	31.9357	37.0984	25.0482	35.7573	15.4481	12.1326	10.8961	13.8043	9.18493	8.75403
sp|P47127|AIM24_YEAST	AIM24	Altered inheritance of mitochondria protein 24, mitochondrial	0	U	R.TILIQTHEMTTSK.D	212.428	214.706	222.723	207.441	210.571	212.502	93.1769	89.7478	97.045	76.197	74.2627	72.567
sp|P47127|AIM24_YEAST	AIM24	Altered inheritance of mitochondria protein 24, mitochondrial	0	U	R.LVDENGK.I	40.8321	35.9013	38.5947	37.6976	37.8856	38.127	16.3284	17.9644	15.5919	17.7493	21.6776	17.5377
sp|P47127|AIM24_YEAST	AIM24	Altered inheritance of mitochondria protein 24, mitochondrial	0	U	K.SAYGHTVQFFK.R	71.7253	62.7899	64.6426	137.294	91.9416	79.1936	30.1455	21.7174	54.0811	22.976	22.5542	39.6235
sp|P47127|AIM24_YEAST	AIM24	Altered inheritance of mitochondria protein 24, mitochondrial	0	U	K.TESNVVTK.E	817.521	859.544	890.241	952.008	945.367	922.965	395.67	382.525	385.112	309.258	314.778	288.45
sp|P47127|AIM24_YEAST	AIM24	Altered inheritance of mitochondria protein 24, mitochondrial	0	U	R.NILAINGQSQLDIANSVER.Q	173.755	169.295	198.92	190.837	175.372	165.301	71.7107	77.4835	77.9901	56.2322	64.9054	62.3841
sp|P47127|AIM24_YEAST	AIM24	Altered inheritance of mitochondria protein 24, mitochondrial	0	U	K.DSIIAFEQNSSLEIK.S	37.6808	39.0736	35.0604	31.1827	34.9146	36.4156	29.9871	31.1556	21.2121	16.1555	15.8574	15.2507
sp|P47127|AIM24_YEAST	AIM24	Altered inheritance of mitochondria protein 24, mitochondrial	0	U	R.TILIQTHEMTTSK.D	117.447	105.175	106.767	120.819	124.514	115.915	49.5426	52.4165	49.5151	42.226	43.6893	37.5859
sp|P47127|AIM24_YEAST	AIM24	Altered inheritance of mitochondria protein 24, mitochondrial	0	U	K.DWNVFGK.D	513.993	567.094	582.181	540.452	605.997	593.4	285.578	247.911	269.682	228.191	213.643	211.064
sp|P47127|AIM24_YEAST	AIM24	Altered inheritance of mitochondria protein 24, mitochondrial	0	U	R.NILAINGQSQLDIANSVER.Q	16.0635	23.3852	20.0363	19.5202	17.7333	17.0631	8.18776	8.64795	5.84805	7.91464	3.88339	6.92869
sp|P47127|AIM24_YEAST	AIM24	Altered inheritance of mitochondria protein 24, mitochondrial	0	U	K.SNVNDNGVNLEK.Q	27.2898	22.901	20.2783	26.7288	29.0441	29.9615	8.87384	8.83107	11.4018	3.657	5.8836	9.48034
sp|P47127|AIM24_YEAST	AIM24	Altered inheritance of mitochondria protein 24, mitochondrial	0	U	R.SLSVLNLTGTK.D	74.8535	84.1184	83.9848	72.8352	83.763	89.9276	36.6178	53.6117	50.6993	38.0961	44.8411	34.9
sp|P47127|AIM24_YEAST	AIM24	Altered inheritance of mitochondria protein 24, mitochondrial	0	U	K.QVANDVNSK.I	777.647	739.088	788.226	850.672	833.295	832.717	341.857	325.813	344.061	261.359	264.116	259.863
sp|P47127|AIM24_YEAST	AIM24	Altered inheritance of mitochondria protein 24, mitochondrial	0	U	R.NILAINGQSQLDIANSVER.Q	16.6902	15.4187	16.4196	16.6753	18.6269	17.9388	6.02698	6.83411	8.0401	8.4313	5.64769	5.30138
sp|P47127|AIM24_YEAST	AIM24	Altered inheritance of mitochondria protein 24, mitochondrial	0	U	R.VDFQSTSK.F	171.751	184.332	161.403	169.523	171.527	184.879	69.2166	71.6057	68.1855	58.6437	54.8664	48.3765
sp|P47127|AIM24_YEAST	AIM24	Altered inheritance of mitochondria protein 24, mitochondrial	0	U	R.SLSVLNLTGTK.D	235.178	231.409	227.899	234.791	248.678	255.638	99.9767	108.041	98.625	82.6337	83.3387	83.9151
sp|P47140|AIM25_YEAST	AIM25	Altered inheritance rate of mitochondria protein 25	0	U	K.IDAPFLSFDFPVTDADGK.I	141.058	152.914	140.35	189.986	199.896	191.93	73.9188	75.6985	95.5085	80.3906	74.1356	68.1192
sp|P47140|AIM25_YEAST	AIM25	Altered inheritance rate of mitochondria protein 25	0	U	R.EMFTDTGVYVVR.F	22.0985	18.74	16.6993	27.4734	25.366	26.4026	12.1133	13.0747	15.577	15.1511	11.5816	11.8929
sp|P47140|AIM25_YEAST	AIM25	Altered inheritance rate of mitochondria protein 25	0	U	R.QTGGFLSFGGGYDE.-	12.1964	15.5741	16.3279	20.8156	21.0049	21.4454	11.2418	12.3215	11.809	5.71504	11.0531	6.79044
sp|P47140|AIM25_YEAST	AIM25	Altered inheritance rate of mitochondria protein 25	0	U	R.QTGGFLSFGGGYDE.-	25.0891	23.9133	25.6984	32.0229	35.4889	30.7541	17.8556	19.2919	16.3017	19.6878	11.6906	17.8673
sp|P47140|AIM25_YEAST	AIM25	Altered inheritance rate of mitochondria protein 25	0	U	K.EGTTVGETIQNWHLWR.R	26.9095	19.9523	18.3427	30.9975	24.9784	26.122	14.1309	17.678	17.5572	15.0079	12.4736	13.8303
sp|P47140|AIM25_YEAST	AIM25	Altered inheritance rate of mitochondria protein 25	0	U	K.EGTTVGETIQNWHLWR.R	32.1744	31.4769	33.6661	35.5015	34.5205	41.7498	18.5835	15.935	18.129	20.5533	23.1651	18.1264
sp|P47140|AIM25_YEAST	AIM25	Altered inheritance rate of mitochondria protein 25	0	U	K.DGVEGSTFDQFGK.I	45.2138	56.9688	51.1901	59.5791	60.8039	67.3347	21.0981	27.7644	27.5417	27.2871	26.6612	25.6258
sp|P47140|AIM25_YEAST	AIM25	Altered inheritance rate of mitochondria protein 25	0	U	R.NWVGLGR.E	16.872	17.7514	19.527	23.8802	23.9478	17.8566	13.1763	10.0568	11.5136	9.97978	13.8426	11.2091
sp|P36154|AIM29_YEAST	AIM29	Altered inheritance rate of mitochondria protein 29	0	U	K.LFEYGIENETEISLFNK.E	138.192	135.485	125.34	131.265	147.129	132.55	129.462	117.511	120.984	124.943	123.669	136.843
sp|P36154|AIM29_YEAST	AIM29	Altered inheritance rate of mitochondria protein 29	0	U	K.IQNEGSFRPFR.N	40.8704	31.1985	37.9049	35.3775	29.8948	27.6041	31.3373	26.6272	34.1483	22.8282	30.1131	29.9326
sp|P36154|AIM29_YEAST	AIM29	Altered inheritance rate of mitochondria protein 29	0	U	K.NIVLHDYDLADK.T	317.358	289.651	320.514	320.791	310.515	307.431	209.707	221.794	205.805	233.702	257.19	235.859
sp|P36154|AIM29_YEAST	AIM29	Altered inheritance rate of mitochondria protein 29	0	U	K.NIVLHDYDLADK.T	167.118	166.51	170.18	166.176	156.883	148.3	113.953	101.332	112.264	127.263	129.563	135.107
sp|P36154|AIM29_YEAST	AIM29	Altered inheritance rate of mitochondria protein 29	0	U	K.NIVLHDYDLADK.T	14.0651	12.1768	14.5341	15.5947	19.1966	15.5318	7.7349	7.99619	6.98689	10.8423	9.47449	9.97255
sp|P36154|AIM29_YEAST	AIM29	Altered inheritance rate of mitochondria protein 29	0	U	K.DLFNDVLNK.I	15.6166	9.72118	14.1647	13.1254	15.7381	14.7619	6.97592	10.2049	8.93823	8.55094	12.3277	9.87376
sp|P36154|AIM29_YEAST	AIM29	Altered inheritance rate of mitochondria protein 29	0	U	K.DLFNDVLNK.I	136.584	141.509	144.574	139.699	129.368	137.079	95.9604	83.7293	90.0957	110.471	108.014	101.513
sp|P38266|AIM3_YEAST	AIM3	Altered inheritance of mitochondria protein 3	0	U	K.IQPNTTSSAASLPAK.H	192.407	152.246	160.118	167.105	147.069	158.206	148.863	136.615	184.48	122.467	167.485	169.777
sp|P38266|AIM3_YEAST	AIM3	Altered inheritance of mitochondria protein 3	0	U	K.LHEGTITSEVDSSK.D	383.483	375.065	404.289	437.062	421.13	430.246	211.193	220.558	247.429	263.019	252.992	248.745
sp|P38266|AIM3_YEAST	AIM3	Altered inheritance of mitochondria protein 3	0	U	R.EATGQDEVLNSITNELSHIK.L	160.748	140.015	149.037	127.427	128.108	132.695	81.2032	77.0327	74.2173	81.4438	93.5386	105.172
sp|P38266|AIM3_YEAST	AIM3	Altered inheritance of mitochondria protein 3	0	U	K.ENDESTSK.S	21.5827	17.0112	18.0208	16.8045	22.8655	16.9191	12.7604	12.0851	11.7585	17.1244	14.0993	7.44904
sp|P38266|AIM3_YEAST	AIM3	Altered inheritance of mitochondria protein 3	0	U	R.NNVEPPPPPSR.G	64.2186	68.1563	60.8314	76.7416	77.8146	71.8824	38.835	43.4429	46.2808	45.6962	48.6547	40.8794
sp|P38266|AIM3_YEAST	AIM3	Altered inheritance of mitochondria protein 3	0	U	R.AHMETQPIQNFQPPPK.P	82.2621	77.6251	83.7453	118.043	110.546	109.239	43.7939	37.0161	44.7156	40.0029	39.9317	42.0955
sp|P38266|AIM3_YEAST	AIM3	Altered inheritance of mitochondria protein 3	0	U	R.AHMETQPIQNFQPPPK.P	88.2411	91.3264	101.756	141.77	132.942	130.622	39.696	36.0568	32.0998	36.3412	40.0344	36.9611
sp|P38266|AIM3_YEAST	AIM3	Altered inheritance of mitochondria protein 3	0	U	R.AYSGDISAADDNLNPFER.Y	11.2999	13.2196	18.0155	15.4941	5.94406	12.9459	9.20613	7.26269	8.28083	11.949	9.71885	10.4259
sp|P38266|AIM3_YEAST	AIM3	Altered inheritance of mitochondria protein 3	0	U	R.AVPILPPR.N	20.804	13.5808	16.395	17.4021	19.8298	14.0688	8.98544	9.73583	10.9341	9.61343	14.3165	12.7688
sp|P38266|AIM3_YEAST	AIM3	Altered inheritance of mitochondria protein 3	0	U	R.GAVVHQEPAPSGK.I	161.918	155.341	161.899	193.243	156.83	180.044	110.189	106.439	114.799	118.152	130.807	133.907
sp|P38266|AIM3_YEAST	AIM3	Altered inheritance of mitochondria protein 3	0	U	K.SIPPVTSSIQAQQSTK.K	30.5406	36.0812	32.2913	36.4507	32.989	31.4778	20.0186	20.4454	22.1814	26.2026	31.2121	28.7855
sp|P38266|AIM3_YEAST	AIM3	Altered inheritance of mitochondria protein 3	0	U	K.IDIPTVDVSSLPPPPTHR.D	74.2494	75.6401	75.461	101.659	98.7568	88.3823	114.253	106.469	118.095	102.708	116.025	121.096
sp|Q04689|AIM32_YEAST	AIM32	Altered inheritance of mitochondria protein 32	0	U	R.FQGETFLR.D	75.9255	83.963	84.765	92.7371	92.7981	77.4514	58.3936	52.2293	48.4377	39.1897	39.527	46.3106
sp|Q04689|AIM32_YEAST	AIM32	Altered inheritance of mitochondria protein 32	0	U	K.IIDEMYR.G	109.516	104.538	99.9951	138.405	128.286	141.917	55.0274	59.3417	55.264	33.6157	39.8963	35.8915
sp|Q04689|AIM32_YEAST	AIM32	Altered inheritance of mitochondria protein 32	0	U	K.VAWNHNLDTNTNRPYNAISK.L	129.865	132.285	141.008	178.282	163.57	161.834	64.3896	71.5199	71.0112	54.7976	48.897	52.4185
sp|Q04689|AIM32_YEAST	AIM32	Altered inheritance of mitochondria protein 32	0	U	K.VAWNHNLDTNTNRPYNAISK.L	220.208	176.539	203.418	260.616	238.159	248.013	103.778	87.267	110.234	59.9945	61.739	75.7886
sp|Q04689|AIM32_YEAST	AIM32	Altered inheritance of mitochondria protein 32	0	U	K.HVLLLSPGDR.F	51.4879	50.1262	53.6807	70.3458	67.5659	75.4991	25.1099	23.0694	21.5885	16.6139	20.6981	17.4318
sp|Q03798|AIM36_YEAST	AIM36	Altered inheritance of mitochondria protein 36, mitochondrial	0	U	R.YEALLNEYYK.K	22.7356	28.3572	19.488	24.9474	23.8417	21.8652	18.1339	17.7915	12.5269	17.7557	16.7016	14.6847
sp|Q03798|AIM36_YEAST	AIM36	Altered inheritance of mitochondria protein 36, mitochondrial	0	U	R.VAIFPQGEVDIK.F	146.788	185.799	163.786	164.409	150.958	160.846	107.19	115.448	122.641	111.246	97.9886	105.324
sp|Q03798|AIM36_YEAST	AIM36	Altered inheritance of mitochondria protein 36, mitochondrial	0	U	R.VAIFPQGEVDIK.F	151.952	159.24	149.737	141.076	156.85	169.036	117.92	123.496	117.288	118.6	95.6878	94.6206
sp|Q03798|AIM36_YEAST	AIM36	Altered inheritance of mitochondria protein 36, mitochondrial	0	U	K.FSLSPSIEETRK.V	104.202	85.7313	93.9905	111.64	81.624	95.6721	92.5334	71.5746	75.8929	55.5697	66.6131	82.2221
sp|Q03798|AIM36_YEAST	AIM36	Altered inheritance of mitochondria protein 36, mitochondrial	0	U	R.DDRYEALLNEYYK.K	48.4171	34.5278	37.61	37.6889	32.8311	38.7397	30.509	31.6076	33.2493	23.0161	29.5484	37.7171
sp|Q03798|AIM36_YEAST	AIM36	Altered inheritance of mitochondria protein 36, mitochondrial	0	U	K.LVVVNFPHSIADATR.F	19.74	19.2524	19.1398	18.6117	16.0867	15.4269	17.0039	15.1746	14.3997	14.317	14.5544	16.6612
sp|Q03798|AIM36_YEAST	AIM36	Altered inheritance of mitochondria protein 36, mitochondrial	0	U	R.FENEVSIVSK.I	113.196	123.32	130.248	128.93	138.642	134.891	108.056	117.861	107.341	101.096	108.064	91.8986
sp|Q03798|AIM36_YEAST	AIM36	Altered inheritance of mitochondria protein 36, mitochondrial	0	U	K.YYETVGK.A	32.7597	32.8504	37.3786	39.9011	35.7406	43.221	33.0548	34.501	34.6008	25.0928	35.4596	38.56
sp|Q03798|AIM36_YEAST	AIM36	Altered inheritance of mitochondria protein 36, mitochondrial	0	U	R.DDRYEALLNEYYK.K	78.9978	81.496	79.7023	86.1195	74.4798	81.4123	61.8065	54.666	64.308	60.4726	58.6414	56.0644
sp|Q03798|AIM36_YEAST	AIM36	Altered inheritance of mitochondria protein 36, mitochondrial	0	U	R.VAIFPQGEVDIK.F	27.0376	32.2445	22.6709	23.1209	32.2387	23.3742	25.569	30.373	27.5368	21.8069	27.9295	27.0803
sp|Q03798|AIM36_YEAST	AIM36	Altered inheritance of mitochondria protein 36, mitochondrial	0	U	R.VAIFPQGEVDIK.F	466.522	443.698	467.561	510.854	497.567	545.844	331.041	322.683	330.016	327.65	362.718	287.472
sp|Q03798|AIM36_YEAST	AIM36	Altered inheritance of mitochondria protein 36, mitochondrial	0	U	K.SQGDDINELQFVDPVK.V	18.5373	28.833	17.5906	18.9107	24.0638	21.0241	11.4783	16.1562	15.7888	20.5984	15.5528	13.4567
sp|Q03798|AIM36_YEAST	AIM36	Altered inheritance of mitochondria protein 36, mitochondrial	0	U	K.YYETVGK.A	70.0576	66.7507	61.4178	70.3212	82.0338	73.8924	54.4335	59.6234	67.2045	41.6382	48.7723	55.1337
sp|Q08223|AIM39_YEAST	AIM39	Altered inheritance of mitochondria protein 39, mitochondrial	0	U	K.KVDVNQVQK.L	523.355	537.352	539.96	321.256	320.422	320.344	220.415	238.099	242.737	160.361	149.123	151.246
sp|Q08223|AIM39_YEAST	AIM39	Altered inheritance of mitochondria protein 39, mitochondrial	0	U	R.VLEILSGHDMIK.E	80.9974	104.88	93.0686	63.5107	58.0508	57.9735	46.3371	56.0266	59.5723	37.8483	30.4391	36.4642
sp|Q08223|AIM39_YEAST	AIM39	Altered inheritance of mitochondria protein 39, mitochondrial	0	U	K.EQSFLPLFPSSK.I	165.215	192.772	179.505	101.253	93.6472	96.7349	78.3213	69.8924	70.0923	43.4997	57.5737	57.7135
sp|Q08223|AIM39_YEAST	AIM39	Altered inheritance of mitochondria protein 39, mitochondrial	0	U	K.EQSFLPLFPSSK.I	285.242	319.804	308.501	153.462	163.817	177.594	153.807	151.846	152.21	110.054	113.914	119.953
sp|Q08223|AIM39_YEAST	AIM39	Altered inheritance of mitochondria protein 39, mitochondrial	0	U	R.VLEILSGHDMIK.E	203.765	214.449	210.263	122.919	121.919	115.211	107.448	97.6376	106.731	80.7875	69.0949	70.6081
sp|Q08223|AIM39_YEAST	AIM39	Altered inheritance of mitochondria protein 39, mitochondrial	0	U	R.VLEILSGHDMIK.E	180.32	200.693	214.498	132.031	129.377	127.505	109.918	105.397	116.732	65.4352	62.7561	79.3874
sp|Q08223|AIM39_YEAST	AIM39	Altered inheritance of mitochondria protein 39, mitochondrial	0	U	K.EQYGVPLLDK.D	363.937	365.905	362.905	188.134	207.74	215.718	135.58	127.59	120.8	87.3568	85.2133	76.6713
sp|Q08223|AIM39_YEAST	AIM39	Altered inheritance of mitochondria protein 39, mitochondrial	0	U	K.LQEIDLFR.R	292.589	280.004	289.063	142.872	170.649	161.38	115.43	116.338	104.679	92.4694	91.4065	78.6551
sp|P38305|AIM4_YEAST	AIM4	Altered inheritance of mitochondria protein 4	0	U	R.NIPYNPATFK.R	15.4879	15.3174	15.7263	25.7493	23.3927	26.5254	20.278	20.5459	17.4618	23.0118	25.9132	19.5491
sp|Q12032|AIM41_YEAST	AIM41	Altered inheritance of mitochondria protein 41, mitochondrial	0	U	K.DSINEFLANK.R	132.778	133.04	136.57	147.313	143.475	139.11	23.1593	23.4882	29.2413	21.9738	22.1931	26.5203
sp|Q12032|AIM41_YEAST	AIM41	Altered inheritance of mitochondria protein 41, mitochondrial	0	U	K.TSPTAIK.N	70.0057	69.5234	70.4181	89.1452	95.802	74.6194	22.2855	18.2125	13.2732	12.6493	13.5447	8.46594
sp|Q12032|AIM41_YEAST	AIM41	Altered inheritance of mitochondria protein 41, mitochondrial	0	U	K.EQGEM*DIIK.K	35.7851	37.9275	33.809	41.7029	40.6943	40.5155	7.64884	8.4475	8.22631	3.94164	8.27344	5.79181
sp|Q12032|AIM41_YEAST	AIM41	Altered inheritance of mitochondria protein 41, mitochondrial	0	U	K.EQGEMDIIK.K	414.057	425.105	402.703	465.127	463.953	453.466	59.3397	66.9115	65.8374	67.4366	69.0399	63.5217
sp|Q12032|AIM41_YEAST	AIM41	Altered inheritance of mitochondria protein 41, mitochondrial	0	U	K.YMDQLPVSSELDIDQNVK.K	22.6889	23.1175	21.0397	26.4547	28.6142	27.9368	8.76294	10.5238	9.33888	11.2496	13.6814	8.99947
sp|Q12032|AIM41_YEAST	AIM41	Altered inheritance of mitochondria protein 41, mitochondrial	0	U	K.YMDQLPVSSELDIDQNVK.K	38.7274	39.1908	41.9236	48.5377	43.0791	51.1472	18.4198	26.7444	13.985	19.0355	14.7281	18.3924
sp|Q12032|AIM41_YEAST	AIM41	Altered inheritance of mitochondria protein 41, mitochondrial	0	U	K.SLPTEWK.T	1608.89	1654.93	1628.61	2220.4	1218.65	1983.36	341.304	304.692	367.92	300.737	303.314	313.399
sp|Q12032|AIM41_YEAST	AIM41	Altered inheritance of mitochondria protein 41, mitochondrial	0	U	K.EIM*GEIDWK.S	118.893	58.2475	69.9889	47.815	122.535	45.0799	7.39459	15.8936	14.4809	11.8505	6.67967	9.39974
sp|Q12032|AIM41_YEAST	AIM41	Altered inheritance of mitochondria protein 41, mitochondrial	0	U	K.RDDLVAK.E	203.293	202.807	209.862	231	249.571	223.495	43.2136	42.7415	44.2224	40.7314	43.9218	33.7884
sp|Q12032|AIM41_YEAST	AIM41	Altered inheritance of mitochondria protein 41, mitochondrial	0	U	K.SADEYSLYDMYSK.L	28.0527	19.4704	25.6399	22.8501	24.5368	24.9241	5.2949	4.83963	0	0	4.88277	2.68201
sp|Q12032|AIM41_YEAST	AIM41	Altered inheritance of mitochondria protein 41, mitochondrial	0	U	K.EIMGEIDWK.S	941.308	905.847	958.68	1266.75	1055.15	1067.79	176.203	164.774	221.985	175.848	182.513	161.403
sp|Q12032|AIM41_YEAST	AIM41	Altered inheritance of mitochondria protein 41, mitochondrial	0	U	R.NMLSAIK.N	216.694	236.837	224.391	293.728	273.12	281.924	79.7907	65.7054	73.2058	62.0541	65.6354	67.0423
sp|Q12032|AIM41_YEAST	AIM41	Altered inheritance of mitochondria protein 41, mitochondrial	0	U	K.EIMGEIDWK.S	55.9948	59.7182	53.7668	77.7796	61.2038	70.9405	16.3006	12.54	15.3686	11.679	11.9808	11.7566
sp|Q12032|AIM41_YEAST	AIM41	Altered inheritance of mitochondria protein 41, mitochondrial	0	U	K.YMDQLPVSSELDIDQNVK.K	34.4326	35.0228	37.1568	47.1968	42.0204	44.7904	11.7376	14.9893	15.686	13.2121	19.439	11.8463
sp|Q12032|AIM41_YEAST	AIM41	Altered inheritance of mitochondria protein 41, mitochondrial	0	U	K.EIM*GEIDWK.S	36.4819	43.8241	38.4087	50.1707	46.3147	45.3131	19.3747	22.2075	19.3421	14.4682	17.1266	17.6497
sp|Q12032|AIM41_YEAST	AIM41	Altered inheritance of mitochondria protein 41, mitochondrial	0	U	R.NMLSAIK.N	317.258	357.446	340.307	429.503	396.468	421.736	81.5573	68.0994	74.5429	62.3072	64.5015	71.3808
sp|Q12032|AIM41_YEAST	AIM41	Altered inheritance of mitochondria protein 41, mitochondrial	0	U	K.SADEYSLYDMYSK.L	21.2742	30.7867	21.1615	27.6358	30.8184	25.036	6.41025	7.3165	6.96337	7.17855	10.8053	6.88455
sp|Q12032|AIM41_YEAST	AIM41	Altered inheritance of mitochondria protein 41, mitochondrial	0	U	K.SADEYSLYDMYSK.L	122.545	124.295	112.2	148.234	131.225	138.69	23.748	20.0294	28.3456	18.7868	20.0442	20.6228
sp|Q12032|AIM41_YEAST	AIM41	Altered inheritance of mitochondria protein 41, mitochondrial	0	U	K.SLPTEWK.T	28.7475	21.8243	23.2092	37.771	32.2329	23.8333	5.54013	6.41201	8.71239	7.17445	6.06688	6.34523
sp|Q12032|AIM41_YEAST	AIM41	Altered inheritance of mitochondria protein 41, mitochondrial	0	U	K.SADEYSLYDM*YSK.L	52.8957	51.5662	55.7764	64.1513	52.9036	61.8167	6.41573	7.25165	13.0566	7.69984	11.5864	11.0228
sp|Q12032|AIM41_YEAST	AIM41	Altered inheritance of mitochondria protein 41, mitochondrial	0	U	K.RDDLVAK.E	343.603	311.988	359.715	356.509	352.038	350.542	65.9091	68.0988	71.3328	57.1726	55.7552	57.6451
sp|Q12032|AIM41_YEAST	AIM41	Altered inheritance of mitochondria protein 41, mitochondrial	0	U	K.SADEYSLYDMYSK.L	68.771	73.9098	58.7305	78.3545	80.6134	72.0961	10.8774	10.8037	15.8023	8.72871	8.61427	8.38394
sp|Q12032|AIM41_YEAST	AIM41	Altered inheritance of mitochondria protein 41, mitochondrial	0	U	K.SADEYSLYDMYSK.L	22.205	21.9519	22.4277	23.2237	24.1124	23.2576	4.64395	4.45587	5.98841	5.97546	7.16353	5.78859
sp|Q12032|AIM41_YEAST	AIM41	Altered inheritance of mitochondria protein 41, mitochondrial	0	U	K.SADEYSLYDMYSK.L	41.84	43.8119	47.9391	50.3341	42.488	53.7939	18.0095	15.2926	21.5566	16.1895	18.3803	18.9884
sp|Q12032|AIM41_YEAST	AIM41	Altered inheritance of mitochondria protein 41, mitochondrial	0	U	K.TSPTAIK.N	144.313	141.279	145.621	199.432	179.723	166.726	25.7703	31.1216	30.1762	21.2027	19.6472	25.0819
sp|Q12032|AIM41_YEAST	AIM41	Altered inheritance of mitochondria protein 41, mitochondrial	0	U	K.DSINEFLANK.R	34.195	34.3871	26.4342	30.2678	33.0242	29.7409	6.85506	4.51461	7.93366	6.09442	5.34711	5.07846
sp|Q99299|AIM44_YEAST	AIM44	Altered inheritance of mitochondria protein 44	0	U	K.NSFISVPDNVSHAVTR.N	6.22607	4.53312	6.67722	48.3989	49.5266	46.8056	6.52142	5.77943	2.92838	18.0126	21.4741	13.4139
sp|Q12480|ETFA_YEAST	AIM45	Probable electron transfer flavoprotein subunit alpha, mitochondrial	0	U	K.LLSPLADVLHAAIGATR.A	9.0897	6.51413	8.4587	13.9045	11.5563	12.1874	8.25452	6.79654	10.036	8.03492	9.24769	4.8376
sp|Q12480|ETFA_YEAST	AIM45	Probable electron transfer flavoprotein subunit alpha, mitochondrial	0	U	K.LSNPITAVITGSK.A	13.1139	13.8451	19.4473	7.0944	14.8327	9.41698	7.52496	8.98139	11.3712	2.95655	7.45737	6.08782
sp|Q12480|ETFA_YEAST	AIM45	Probable electron transfer flavoprotein subunit alpha, mitochondrial	0	U	K.LVIFEDSK.L	165.629	183.91	183.158	226.511	233.178	220.94	154.862	166.394	125.616	158.619	146.325	144.114
sp|Q12480|ETFA_YEAST	AIM45	Probable electron transfer flavoprotein subunit alpha, mitochondrial	0	U	R.SSLSLLAAAQK.L	185.46	182.426	185.568	246.203	254.415	260.084	161.046	152.725	185.504	186.371	183.035	190.969
sp|Q12480|ETFA_YEAST	AIM45	Probable electron transfer flavoprotein subunit alpha, mitochondrial	0	U	R.SSLSLLAAAQK.L	214.392	209.09	219.195	298.888	304.53	312.15	205.238	200.424	218.43	232.463	225.906	214.718
sp|Q12480|ETFA_YEAST	AIM45	Probable electron transfer flavoprotein subunit alpha, mitochondrial	0	U	R.SSLSLLAAAQK.L	186.852	183.195	176.619	289.329	242.554	257.885	178.601	183.555	170.952	161.478	180.842	178.942
sp|Q12480|ETFA_YEAST	AIM45	Probable electron transfer flavoprotein subunit alpha, mitochondrial	0	U	K.LSNPITAVITGSK.A	404.693	412.819	387.472	550.583	552.425	567.248	308.662	304.437	341.274	313.272	294.676	334.968
sp|Q12480|ETFA_YEAST	AIM45	Probable electron transfer flavoprotein subunit alpha, mitochondrial	0	U	R.SSLSLLAAAQK.L	224.628	229.85	246.356	334.831	315.384	341.246	210.33	191.931	209.674	222.491	244.795	231.456
sp|Q12480|ETFA_YEAST	AIM45	Probable electron transfer flavoprotein subunit alpha, mitochondrial	0	U	K.SERPELTSAQNVVTGGR.A	9.98228	15.2522	12.409	17.9262	15.4903	19.0587	8.73832	9.37104	8.67651	10.0073	10.1752	7.95579
sp|Q12480|ETFA_YEAST	AIM45	Probable electron transfer flavoprotein subunit alpha, mitochondrial	0	U	K.SERPELTSAQNVVTGGR.A	121.919	104.1	116.529	169.378	160.434	170.118	94.8729	92.6575	106.957	100.985	107.215	93.8979
sp|P38885|AIM46_YEAST	AIM46	Altered inheritance of mitochondria protein 46, mitochondrial	0	U	K.HLVSEVLDSK.F	98.9772	102.973	114.02	50.5721	53.6905	50.8344	28.2052	30.9112	34.6009	15.445	14.1194	19.5685
sp|P38885|AIM46_YEAST	AIM46	Altered inheritance of mitochondria protein 46, mitochondrial	0	U	K.NPDSQSQDK.D	99.5837	92.8816	93.1581	30.7418	30.0878	33.617	18.9669	13.7182	21.3156	10.2432	5.15391	9.55708
sp|P38885|AIM46_YEAST	AIM46	Altered inheritance of mitochondria protein 46, mitochondrial	0	U	R.DDDFFIELNK.D	168.034	160.276	184.746	60.2838	68.0761	53.7235	46.8409	49.4154	48.696	26.7944	37.0532	34.931
sp|P38885|AIM46_YEAST	AIM46	Altered inheritance of mitochondria protein 46, mitochondrial	0	U	K.KADATSVAVDASISAFPK.K	597.694	608.527	566.337	312.007	287.075	293.755	197.245	199.897	228.695	118.165	116.918	103.406
sp|P38885|AIM46_YEAST	AIM46	Altered inheritance of mitochondria protein 46, mitochondrial	0	U	K.M*GPPQWPFSTQYELIGK.G	62.333	38.3665	46.4255	6.93049	7.58807	5.04538	8.07911	5.99216	4.5383	2.41753	4.03989	4.34521
sp|P38885|AIM46_YEAST	AIM46	Altered inheritance of mitochondria protein 46, mitochondrial	0	U	K.LLMDGTK.K	486.004	510.692	518.505	203.476	212.198	216.774	127.388	131.624	133.081	78.1752	83.8932	85.4196
sp|P38885|AIM46_YEAST	AIM46	Altered inheritance of mitochondria protein 46, mitochondrial	0	U	R.AALNDPAK.A	329.099	326.656	317.108	141.678	140.713	154.626	115.168	103.913	112.183	70.7251	76.2111	71.6487
sp|P38885|AIM46_YEAST	AIM46	Altered inheritance of mitochondria protein 46, mitochondrial	0	U	K.WYDDSQIK.K	436.081	522.536	462.968	156.869	149.652	177.219	102.405	116.979	101.298	57.1056	59.8759	64.749
sp|P38885|AIM46_YEAST	AIM46	Altered inheritance of mitochondria protein 46, mitochondrial	0	U	K.MGPPQWPFSTQYELIGK.G	66.3917	50.8553	56.9098	22.1723	17.4686	25.1696	16.6263	12.5463	19.0383	9.2598	7.59031	11.1176
sp|P38885|AIM46_YEAST	AIM46	Altered inheritance of mitochondria protein 46, mitochondrial	0	U	K.MGPPQWPFSTQYELIGK.G	29.1264	20.7856	19.5541	6.51036	10.8599	13.451	8.79901	8.1617	3.57135	2.87849	6.19389	2.93891
sp|P38885|AIM46_YEAST	AIM46	Altered inheritance of mitochondria protein 46, mitochondrial	0	U	K.APILINNLLDSGIR.L	41.1484	45.159	41.0502	22.5135	18.4606	24.1451	12.5456	15.8432	18.0976	8.85282	12.3014	6.24796
sp|P38885|AIM46_YEAST	AIM46	Altered inheritance of mitochondria protein 46, mitochondrial	0	U	K.KWYDDSQIK.K	410.651	259.233	248.525	221.794	135.093	141.094	72.1999	59.833	104.792	36.4577	49.1673	57.9546
sp|P38885|AIM46_YEAST	AIM46	Altered inheritance of mitochondria protein 46, mitochondrial	0	U	K.WYDDSQIK.K	280.06	284.032	291.636	91.3992	102.913	95.5367	67.1576	57.3288	73.4945	41.7282	39.632	40.0574
sp|P38885|AIM46_YEAST	AIM46	Altered inheritance of mitochondria protein 46, mitochondrial	0	U	K.AYGLGIYVAAEDK.H	20.9912	22.2844	21.7672	6.56442	10.3316	8.51105	6.88467	10.8901	9.65401	6.69529	2.56089	5.24105
sp|P38885|AIM46_YEAST	AIM46	Altered inheritance of mitochondria protein 46, mitochondrial	0	U	K.AYGLGIYVAAEDK.H	16.0022	22.8935	21.4647	5.67072	8.63216	7.24176	7.35188	7.4463	7.00458	6.2329	7.54396	5.78471
sp|P38885|AIM46_YEAST	AIM46	Altered inheritance of mitochondria protein 46, mitochondrial	0	U	K.HLVSEVLDSK.F	95.3095	104.892	98.1936	34.264	33.0237	42.7795	29.9598	32.6433	31.4614	17.6424	16.0636	16.0115
sp|Q07716|AIM6_YEAST	AIM6	Altered inheritance of mitochondria protein 6	0	U	K.SDDNELTYK.L	28.3274	29.699	34.5237	34.8648	35.0242	35.27	14.7618	18.7896	12.5946	29.2639	25.4181	19.7346
sp|Q07716|AIM6_YEAST	AIM6	Altered inheritance of mitochondria protein 6	0	U	K.ILAVGHNEAYLDPVELTLDK.L	13.0422	18.3008	10.9575	13.6109	16.0892	16.0993	5.34329	6.58677	7.59815	9.99413	5.99936	6.60734
sp|Q07716|AIM6_YEAST	AIM6	Altered inheritance of mitochondria protein 6	0	U	K.ILAVGHNEAYLDPVELTLDK.L	275.167	266.743	261.484	329.665	338.057	351.213	145.302	147.435	157.181	187.006	175.586	185.842
sp|Q07716|AIM6_YEAST	AIM6	Altered inheritance of mitochondria protein 6	0	U	K.DVNPMPVHSHNDYWR.K	171.723	178.567	193.754	260.198	266.69	261.046	92.7328	95.0268	126.616	113.636	123.725	129.162
sp|Q07716|AIM6_YEAST	AIM6	Altered inheritance of mitochondria protein 6	0	U	R.NPSLTDWEK.L	108.777	103.953	106.896	283.551	289.705	301.824	340.176	367.45	340.758	359.601	355.021	358.09
sp|Q07716|AIM6_YEAST	AIM6	Altered inheritance of mitochondria protein 6	0	U	K.LLM*EQYFK.S	10.6058	9.53341	10.9085	14.9735	10.6827	12.6301	6.72233	6.26195	8.88376	7.25676	4.96098	6.72319
sp|Q07716|AIM6_YEAST	AIM6	Altered inheritance of mitochondria protein 6	0	U	K.LLMEQYFK.S	13.0753	10.5426	10.4068	14.6967	8.30899	11.4651	9.7966	8.20438	6.33593	8.97773	9.98037	9.15642
sp|Q07716|AIM6_YEAST	AIM6	Altered inheritance of mitochondria protein 6	0	U	K.DVNPMPVHSHNDYWR.K	61.3199	62.572	63.7262	86.0062	80.4577	95.6161	46.9816	35.697	47.6912	41.5017	47.2142	52.8857
sp|Q07716|AIM6_YEAST	AIM6	Altered inheritance of mitochondria protein 6	0	U	K.SLIDSGYLTYYDM*K.K	24.2372	22.1893	23.2474	37.4031	32.189	31.9943	16.2169	9.18885	13.2126	18.6813	18.715	19.0558
sp|Q07716|AIM6_YEAST	AIM6	Altered inheritance of mitochondria protein 6	0	U	R.FAFLDAPLLSLEPK.Y	986.918	1016.98	1057.39	1218.77	1308.4	1315.47	633.112	680.703	588.378	890.712	806.883	830.545
sp|Q07716|AIM6_YEAST	AIM6	Altered inheritance of mitochondria protein 6	0	U	R.KLPLFEGLAYGASSTEADVWNIDEK.I	168.394	141.71	131.146	329.463	288.329	323.176	52.7322	63.697	91.5898	71.2149	69.2055	90.1238
sp|Q07716|AIM6_YEAST	AIM6	Altered inheritance of mitochondria protein 6	0	U	K.SIIDGAHALK.L	13.6892	12.5717	16.9555	28.7285	18.5255	21.6897	11.329	8.21323	10.5637	9.06531	10.6222	14.5038
sp|Q12156|AIM7_YEAST	AIM7	Protein AIM7	0	U	R.FVLTAYPTTTK.D	26.2698	36.5244	37.3237	44.7398	39.7156	35.5545	33.5305	36.0562	33.953	35.2704	29.404	32.7786
sp|Q12156|AIM7_YEAST	AIM7	Protein AIM7	0	U	R.FVLTAYPTTTK.D	17.9051	14.922	9.6196	15.873	15.9577	19.1929	14.7975	14.0626	9.20494	14.6872	15.0656	15.8503
sp|Q12156|AIM7_YEAST	AIM7	Protein AIM7	0	U	K.PMTVVSQEWK.M	97.2306	81.9967	109.596	132.019	144.326	138.206	70.2979	57.9219	64.087	77.4431	72.4469	79.5969
sp|Q12156|AIM7_YEAST	AIM7	Protein AIM7	0	U	K.LIEVSSGLEDDSDVEELR.E	33.3764	40.5651	40.4312	51.3806	67.4026	52.5918	61.5779	53.1876	50.8819	71.6521	65.968	62.0961
sp|Q12156|AIM7_YEAST	AIM7	Protein AIM7	0	U	K.LIEVSSGLEDDSDVEELR.E	39.1322	45.2191	44.2929	68.5343	68.4052	68.5385	66.7781	73.3922	69.2756	85.5962	86.3965	80.4306
sp|P40053|AIM9_YEAST	AIM9	Altered inheritance of mitochondria protein 9, mitochondrial	0	U	K.FSIEGLNR.I	337.66	332.526	337.157	374.81	375.86	392.574	497.439	453.344	497.046	507.39	471.395	483.288
sp|P40053|AIM9_YEAST	AIM9	Altered inheritance of mitochondria protein 9, mitochondrial	0	U	K.LNAFGSIYFNNDLK.D	197.334	160.252	167.419	177.463	171.843	177.351	127.631	115.973	143.951	105.731	145.578	142.196
sp|P40053|AIM9_YEAST	AIM9	Altered inheritance of mitochondria protein 9, mitochondrial	0	U	K.SHLDFHK.Q	415.347	446.49	418.422	607.351	576.494	564.133	236.927	211.341	252.328	270.493	274.959	280.074
sp|P40053|AIM9_YEAST	AIM9	Altered inheritance of mitochondria protein 9, mitochondrial	0	U	K.LITAVAPPVK.L	296.53	308.394	304.411	356.944	349.17	361.677	175.276	164.527	190.935	213.877	205.743	231.202
sp|P40053|AIM9_YEAST	AIM9	Altered inheritance of mitochondria protein 9, mitochondrial	0	U	K.ILPPVFNK.N	117.53	99.2247	110.654	98.7569	104.931	104.774	56.8411	62.1937	60.9188	67.6632	60.4645	64.6729
sp|P40053|AIM9_YEAST	AIM9	Altered inheritance of mitochondria protein 9, mitochondrial	0	U	K.KFPLNYSK.E	154.122	153.084	166.153	190.248	174.846	182.723	113.113	118.048	117.237	115.779	116.848	112.783
sp|P40053|AIM9_YEAST	AIM9	Altered inheritance of mitochondria protein 9, mitochondrial	0	U	R.NQHQWEK.K	52.8904	53.1104	52.0465	57.3354	60.1134	59.948	28.7332	24.2417	40.3903	28.3783	37.4492	28.9307
sp|P40053|AIM9_YEAST	AIM9	Altered inheritance of mitochondria protein 9, mitochondrial	0	U	K.LTNDNDPK.R	302.013	296.931	321.437	345.026	358.566	371.862	165.055	156.748	176.698	187.244	185.801	182.887
sp|P40053|AIM9_YEAST	AIM9	Altered inheritance of mitochondria protein 9, mitochondrial	0	U	K.LNDNNPK.L	23.7305	21.6765	25.521	22.2942	28.6593	24.7066	15.3038	12.8922	13.2094	14.7172	11.4581	14.4836
sp|P40053|AIM9_YEAST	AIM9	Altered inheritance of mitochondria protein 9, mitochondrial	0	U	K.VQYQFM*YK.R	17.4034	14.2311	19.144	20.8991	19.2116	24.7925	10.946	11.2681	14.2526	12.3553	12.2713	12.4724
sp|P40053|AIM9_YEAST	AIM9	Altered inheritance of mitochondria protein 9, mitochondrial	0	U	K.QVSDFQSK.L	102.436	116.924	117.4	116.462	117.34	114.63	74.958	76.3165	65.2374	81.36	89.8128	74.923
sp|P40053|AIM9_YEAST	AIM9	Altered inheritance of mitochondria protein 9, mitochondrial	0	U	K.QVSDFQSK.L	569.261	575.316	610.766	549.425	561.769	514.362	341.282	342.842	348.498	402.838	370.891	352.507
sp|P40053|AIM9_YEAST	AIM9	Altered inheritance of mitochondria protein 9, mitochondrial	0	U	K.VQYQFMYK.R	187.117	178.135	185.88	245.99	218.505	221.762	123.277	116.051	125.004	114.774	124.37	137.843
sp|P40053|AIM9_YEAST	AIM9	Altered inheritance of mitochondria protein 9, mitochondrial	0	U	K.VDTNLNK.A	98.8249	100.76	108.592	114.773	129.324	122.655	58.8488	58.5025	62.8005	57.689	71.115	60.9279
sp|P40053|AIM9_YEAST	AIM9	Altered inheritance of mitochondria protein 9, mitochondrial	0	U	K.EAGSSAELMYPR.T	84.3274	81.2254	83.5685	98.36	97.9259	102.756	54.5826	44.3491	48.812	57.1117	57.4566	51.3067
sp|P40053|AIM9_YEAST	AIM9	Altered inheritance of mitochondria protein 9, mitochondrial	0	U	K.EDITDFDK.L	65.1028	67.4014	68.2678	74.2547	80.321	78.8306	38.5468	31.7074	32.7837	37.2697	43.6002	39.1518
sp|P40053|AIM9_YEAST	AIM9	Altered inheritance of mitochondria protein 9, mitochondrial	0	U	R.IPYPLENENTLSYR.I	157.404	146.886	165.098	184.076	154.46	171.809	118.209	91.8969	98.9126	114.699	113.7	98.89
sp|P40053|AIM9_YEAST	AIM9	Altered inheritance of mitochondria protein 9, mitochondrial	0	U	K.EAGSSAELMYPR.T	11.3851	9.47373	16.921	13.5661	19.9814	16.6228	10.5221	7.97687	8.68818	10.9962	6.70986	11.1551
sp|P40053|AIM9_YEAST	AIM9	Altered inheritance of mitochondria protein 9, mitochondrial	0	U	K.NLTVSLVNNVVPK.N	15.4729	12.3464	13.3499	14.4022	15.8205	15.3265	9.26651	7.10884	10.1211	11.156	8.79961	5.37173
sp|P40053|AIM9_YEAST	AIM9	Altered inheritance of mitochondria protein 9, mitochondrial	0	U	K.VDTNLNK.A	81.4669	73.0575	77.3953	86.9405	80.1154	80.8316	49.5453	60.9091	51.1131	57.0287	50.8025	59.9842
sp|P40053|AIM9_YEAST	AIM9	Altered inheritance of mitochondria protein 9, mitochondrial	0	U	K.SPMDIIK.N	125.391	118.436	144.372	141.467	134.095	146.567	80.6611	74.8286	67.5258	81.7288	87.6171	68.9709
sp|P40053|AIM9_YEAST	AIM9	Altered inheritance of mitochondria protein 9, mitochondrial	0	U	K.DWDPLIEDGSSNQK.K	70.8128	73.5664	75.043	72.6206	83.7099	87.579	43.8408	39.7566	40.4822	40.5713	40.707	44.4359
sp|P40053|AIM9_YEAST	AIM9	Altered inheritance of mitochondria protein 9, mitochondrial	0	U	K.QENGDYTVK.Q	156.632	144.027	149.306	212.894	191.328	213.048	87.5401	89.9044	108.125	96.7111	103.217	119.893
sp|P40053|AIM9_YEAST	AIM9	Altered inheritance of mitochondria protein 9, mitochondrial	0	U	K.EQITTYENLAK.I	22.5755	25.4466	29.9831	24.7281	37.8727	36.0025	14.4287	12.2649	17.7185	14.7755	14.8573	12.5185
sp|P40053|AIM9_YEAST	AIM9	Altered inheritance of mitochondria protein 9, mitochondrial	0	U	K.LTNDNDPK.R	633.983	715.572	627.326	784.562	784.834	849.551	340.918	371.399	335.593	399.433	380.747	390.15
sp|P40053|AIM9_YEAST	AIM9	Altered inheritance of mitochondria protein 9, mitochondrial	0	U	K.EDIYDGETNPDLQNR.W	17.348	15.5732	15.4088	17.4403	20.5915	18.4113	10.7569	5.64855	6.52924	8.89148	11.4905	7.77796
sp|P40053|AIM9_YEAST	AIM9	Altered inheritance of mitochondria protein 9, mitochondrial	0	U	K.NTGLLEAENAK.T	31.6577	25.7706	31.5738	35.0896	33.7125	42.9029	16.1333	16.5509	10.8517	15.1458	14.566	16.3352
sp|P40053|AIM9_YEAST	AIM9	Altered inheritance of mitochondria protein 9, mitochondrial	0	U	K.VDTNLNK.A	64.0455	77.2234	65.9112	75.9356	73.3127	81.4516	55.2685	44.7049	49.2628	61.3664	52.3053	58.1044
sp|P40053|AIM9_YEAST	AIM9	Altered inheritance of mitochondria protein 9, mitochondrial	0	U	K.VQVTTLSSIHEGK.H	47.2718	55.5243	57.9412	93.2336	70.8551	70.5339	41.449	35.7203	56.1837	48.2672	55.8936	56.6307
sp|P40053|AIM9_YEAST	AIM9	Altered inheritance of mitochondria protein 9, mitochondrial	0	U	K.FSIEGLNR.I	72.4264	78.9557	92.6408	103.129	94.6374	101.487	134.112	125.573	131.614	157.257	154.79	135.155
sp|P40053|AIM9_YEAST	AIM9	Altered inheritance of mitochondria protein 9, mitochondrial	0	U	K.NLTVSLVNNVVPK.N	246.564	234.002	261.629	281.424	269.54	288.241	140.74	137.485	135.678	159.733	157.23	148.155
sp|P40053|AIM9_YEAST	AIM9	Altered inheritance of mitochondria protein 9, mitochondrial	0	U	K.EDIYDGETNPDLQNR.W	15.2162	10.4813	13.3124	18.8226	22.8841	14.6666	7.42078	7.85712	9.4798	5.73188	10.9728	7.39319
sp|P40053|AIM9_YEAST	AIM9	Altered inheritance of mitochondria protein 9, mitochondrial	0	U	K.FSIEGLNR.I	54.1604	53.4514	56.1498	56.7146	66.6884	55.0984	53.0999	56.6973	48.6399	48.1163	39.9223	43.5193
sp|P40053|AIM9_YEAST	AIM9	Altered inheritance of mitochondria protein 9, mitochondrial	0	U	K.SHLDFHK.Q	377.141	392.077	371.539	519.844	488.053	477.618	301.057	302.19	342.196	309.251	306.522	290.625
sp|P46680|AIP1_YEAST	AIP1	Actin-interacting protein 1	0	U	K.LSDLEVSFDLK.T	183.762	168.93	182.949	267.425	266.442	236.521	98.975	105.032	111.107	145.933	146.998	152.201
sp|P46680|AIP1_YEAST	AIP1	Actin-interacting protein 1	0	U	K.PSYISISPSETYIAAGDVM*GK.I	19.1761	19.019	25.5304	32.4528	32.7604	30.7622	12.6681	12.5172	9.33027	17.0853	12.2419	23.3518
sp|P46680|AIP1_YEAST	AIP1	Actin-interacting protein 1	0	U	K.EIIPPQPSTQR.N	131.351	140.801	143.961	238.027	221.446	187.424	100.652	98.4565	104.013	143.141	143.121	147.018
sp|P46680|AIP1_YEAST	AIP1	Actin-interacting protein 1	0	U	R.SMTVGDDGSVVFYQGPPFK.F	17.6111	14.2185	17.5116	24.7272	22.9605	24.9625	19.3018	23.784	16.181	19.3798	15.6432	20.9559
sp|P46680|AIP1_YEAST	AIP1	Actin-interacting protein 1	0	U	R.VWDVTTSK.C	318.4	305.26	342.915	442.52	494.265	442.153	206.357	208.697	200.154	274.387	304.308	271.051
sp|P46680|AIP1_YEAST	AIP1	Actin-interacting protein 1	0	U	R.AKPSYISISPSETYIAAGDVMGK.I	11.2756	3.60844	4.02711	19.8731	17.3795	17.3337	6.20296	6.1357	3.75921	8.1898	6.16118	8.54924
sp|P46680|AIP1_YEAST	AIP1	Actin-interacting protein 1	0	U	K.ILLYDLQSR.E	13.3904	16.444	15.1213	21.6753	20.0497	25.2573	6.33003	12.0986	10.8353	11.6659	12.9013	16.2309
sp|P46680|AIP1_YEAST	AIP1	Actin-interacting protein 1	0	U	K.ILLYDLQSR.E	19.7675	15.5165	17.5715	19.1324	15.094	16.2036	12.3579	9.28181	13.2932	10.721	13.157	12.8475
sp|P46680|AIP1_YEAST	AIP1	Actin-interacting protein 1	0	U	K.AQEYSSISWDDTLK.V	111.322	114.957	101.993	209.51	208.229	207.153	101.59	107.37	102.814	141.327	149.49	139.897
sp|P46680|AIP1_YEAST	AIP1	Actin-interacting protein 1	0	U	K.ILLYDLQSR.E	127.884	149.272	140.744	178.759	194.62	208.299	84.1751	95.0508	88.3415	98.08	120.722	117.234
sp|P46680|AIP1_YEAST	AIP1	Actin-interacting protein 1	0	U	R.VWDVTTSK.C	198.73	202.778	187.432	253.14	289.278	256.744	121.128	159.27	135.727	157.726	158.439	151.363
sp|P46680|AIP1_YEAST	AIP1	Actin-interacting protein 1	0	U	R.AKPSYISISPSETYIAAGDVMGK.I	73.1527	70.4712	60.0518	192.579	215.479	187.96	68.8366	57.0756	75.6901	84.5551	83.3018	84.135
sp|P46680|AIP1_YEAST	AIP1	Actin-interacting protein 1	0	U	R.AKPSYISISPSETYIAAGDVMGK.I	45.5074	37.1095	33.8184	139.984	140.368	125.343	24.7394	32.822	45.7356	53.3612	43.7886	53.7919
sp|P46680|AIP1_YEAST	AIP1	Actin-interacting protein 1	0	U	K.HEFGSQPK.V	141.392	139.228	142.065	326.77	318.28	313.895	131.465	137.125	148.415	198.862	199.001	216.744
sp|P46680|AIP1_YEAST	AIP1	Actin-interacting protein 1	0	U	K.QQLGNQQVGVVATGNGR.I	125.08	118.169	124.16	174.79	183.22	188.826	75.3323	77.871	71.2838	103.19	100.586	90.4335
sp|P46680|AIP1_YEAST	AIP1	Actin-interacting protein 1	0	U	K.LSDLEVSFDLK.T	17.8008	30.2727	20.8699	33.5222	30.1441	26.7201	9.92563	17.2099	11.7825	19.0672	21.7401	12.7063
sp|P46680|AIP1_YEAST	AIP1	Actin-interacting protein 1	0	U	K.AQEYSSISWDDTLK.V	12.8802	11.8164	12.7744	24.9162	15.8593	21.5248	15.8737	15.0296	18.6525	22.567	12.5631	18.1047
sp|P46680|AIP1_YEAST	AIP1	Actin-interacting protein 1	0	U	K.ILLYDLQSR.E	70.5076	73.2512	80.4932	84.1436	87.2727	86.9051	56.2586	50.3336	44.5252	54.5042	65.6003	63.5583
sp|P46680|AIP1_YEAST	AIP1	Actin-interacting protein 1	0	U	K.VPPVVQFTGHGSSVVTTVK.F	13.2186	14.8061	10.9076	19.8633	21.23	20.474	11.6071	9.38331	12.7155	8.43332	17.5487	13.0321
sp|P46680|AIP1_YEAST	AIP1	Actin-interacting protein 1	0	U	K.ESNSVEVNVK.S	13.4276	11.373	9.92967	16.7344	18.6645	18.2215	8.86624	6.77466	3.68162	6.51299	8.06807	10.6728
sp|P46680|AIP1_YEAST	AIP1	Actin-interacting protein 1	0	U	K.QQLGNQQVGVVATGNGR.I	18.0788	14.617	24.995	29.1853	26.6257	22.6893	13.337	13.4542	7.42855	14.0588	15.3199	14.3315
sp|P46680|AIP1_YEAST	AIP1	Actin-interacting protein 1	0	U	K.INAISWK.P	317.506	363.122	321.199	359.942	440.196	417.655	222.684	260.783	206.572	281.898	293.091	260.049
sp|P46680|AIP1_YEAST	AIP1	Actin-interacting protein 1	0	U	R.SM*TVGDDGSVVFYQGPPFK.F	68.3934	56.9274	56.7619	23.7353	31.0209	31.0747	30.2628	25.9273	28.0442	25.4362	21.2398	24.3697
sp|P46680|AIP1_YEAST	AIP1	Actin-interacting protein 1	0	U	R.SM*TVGDDGSVVFYQGPPFK.F	56.8461	42.5515	48.1975	29.9761	31.9571	22.5499	21.6447	21.0095	22.5267	24.0485	23.6338	24.6244
sp|P46680|AIP1_YEAST	AIP1	Actin-interacting protein 1	0	U	R.SM*TVGDDGSVVFYQGPPFK.F	78.9775	54.2689	59.9909	32.7299	42.1117	36.0213	31.2605	22.944	26.5152	29.6322	29.4559	34.5172
sp|P46680|AIP1_YEAST	AIP1	Actin-interacting protein 1	0	U	R.DVEFSPDSGEFVITVGSDR.K	15.1358	15.3535	16.6672	19.5329	22.3537	21.0389	7.07644	6.77488	7.62608	16.9495	9.30033	14.1396
sp|P40507|AIR1_YEAST	AIR1	Protein AIR1	0	U	R.VQTHPLDFPR.S	44.05	40.5683	48.7143	53.1165	65.6879	56.9304	219.141	204.491	214.242	234.86	255.403	232.553
sp|Q12476|AIR2_YEAST	AIR2	Protein AIR2	0	U	K.NTAPFVVDTAPTTPPDK.L	25.6578	17.5007	23.4256	24.837	29.449	27.0473	61.8626	48.7814	54.4847	43.996	53.4447	54.8767
sp|Q12476|AIR2_YEAST	AIR2	Protein AIR2	0	U	R.GETLSLNNNISK.N	230.981	214.127	225.819	217.811	236.286	245.864	267.516	287.415	309.667	274.65	293.719	279.519
sp|Q12476|AIR2_YEAST	AIR2	Protein AIR2	0	U	R.AYILVDDNEK.A	187.686	187.915	198.919	145.257	182.716	149.204	326.327	320.242	323.643	285.169	317.491	307.207
sp|P38080|AKL1_YEAST	AKL1	Serine/threonine-protein kinase AKL1	0	U	K.QSFQDTNEPQTGGIEDAGGSGTIK.G	53.1087	52.1701	54.5006	57.2314	68.8479	67.7231	55.9182	50.6026	51.4903	68.5571	70.6513	67.5696
sp|P38080|AKL1_YEAST	AKL1	Serine/threonine-protein kinase AKL1	0	U	K.QSFQDTNEPQTGGIEDAGGSGTIK.G	34.659	34.3077	29.1292	37.2317	39.5937	41.69	24.0359	31.0776	40.5195	41.3692	44.3677	40.0314
sp|P38080|AKL1_YEAST	AKL1	Serine/threonine-protein kinase AKL1	0	U	R.VLVQDENGLNEMR.N	21.0885	21.9851	20.6673	28.6609	29.5028	31.527	17.4872	13.6954	13.5507	19.672	20.5344	17.2594
sp|P38080|AKL1_YEAST	AKL1	Serine/threonine-protein kinase AKL1	0	U	R.VLVQDENGLNEMR.N	27.6945	18.3398	25.6559	23.2126	28.6464	27.7246	16.4303	12.6973	16.9639	22.2489	15.7446	19.5746
sp|P38080|AKL1_YEAST	AKL1	Serine/threonine-protein kinase AKL1	0	U	R.VLVQDENGLNEMR.N	73.0958	66.9167	67.1858	81.2777	73.459	73.2844	48.019	37.4929	43.8873	58.523	46.8309	56.7116
sp|P38080|AKL1_YEAST	AKL1	Serine/threonine-protein kinase AKL1	0	U	R.NEVEVMK.K	65.8879	58.9468	62.1165	72.8341	78.7123	90.7325	50.0941	42.9726	44.2978	47.4983	57.1397	51.8479
sp|P38080|AKL1_YEAST	AKL1	Serine/threonine-protein kinase AKL1	0	U	K.STLSEDK.S	30.6844	28.7563	32.4686	38.4239	41.7141	41.7573	36.8915	35.1793	39.138	51.0713	49.1518	41.8767
sp|P38080|AKL1_YEAST	AKL1	Serine/threonine-protein kinase AKL1	0	U	K.TPGELYYPSVSELDTYLDK.E	34.0723	32.0083	34.7825	48.9057	47.0096	39.7053	57.3961	53.522	55.2315	61.2045	64.6266	59.8682
sp|P38080|AKL1_YEAST	AKL1	Serine/threonine-protein kinase AKL1	0	U	K.TPGELYYPSVSELDTYLDK.E	77.8822	89.7572	94.3708	115.36	124.292	116.586	140.33	125.976	147.891	158.837	195.009	155.256
sp|P38080|AKL1_YEAST	AKL1	Serine/threonine-protein kinase AKL1	0	U	K.LTEAEIVK.I	234.77	260.471	270.357	333.477	351.609	377.235	192.617	191.406	169.07	214.533	213.416	208.241
sp|P38080|AKL1_YEAST	AKL1	Serine/threonine-protein kinase AKL1	0	U	R.EAMASSASSSGGSNGK.R	15.3069	9.9271	14.4442	14.7439	9.73041	14.9602	11.4787	9.2134	9.47947	14.8965	17.9443	18.2349
sp|P38080|AKL1_YEAST	AKL1	Serine/threonine-protein kinase AKL1	0	U	K.QSSDPTISEQSPR.L	73.2421	85.1932	72.8609	72.2292	87.0394	84.4714	178.739	174.322	181.589	206.976	218.658	211.733
sp|P38080|AKL1_YEAST	AKL1	Serine/threonine-protein kinase AKL1	0	U	R.TNHTTEDMR.N	17.4371	17.006	13.5554	35.572	25.0369	22.4762	18.6209	17.5816	29.3871	22.4217	33.1118	33.7128
sp|P38080|AKL1_YEAST	AKL1	Serine/threonine-protein kinase AKL1	0	U	R.EAMASSASSSGGSNGK.R	35.7465	36.7062	28.3188	38.5352	35.8646	41.5252	27.1236	36.918	32.6552	43.0504	37.3485	38.321
sp|P38080|AKL1_YEAST	AKL1	Serine/threonine-protein kinase AKL1	0	U	K.SNNPFPK.M	185.38	163.234	184.841	197.729	196.74	207.019	137.416	137.041	137.518	151.984	177.252	159.276
sp|P38080|AKL1_YEAST	AKL1	Serine/threonine-protein kinase AKL1	0	U	R.LNTQSLPQR.Q	14.2055	12.621	17.7495	23.977	21.7377	21.0252	21.0637	29.0055	31.2073	25.7537	29.912	24.6626
sp|P38080|AKL1_YEAST	AKL1	Serine/threonine-protein kinase AKL1	0	U	R.YQQAQNQTGTQGNTFPDESQYQSR.V	69.0118	64.5791	83.324	80.7329	74.3125	81.1036	50.2932	43.5552	53.0065	69.0968	55.7124	68.9402
sp|P38080|AKL1_YEAST	AKL1	Serine/threonine-protein kinase AKL1	0	U	R.SNKPMQLGGTIAGDSGNR.R	46.4254	33.5213	45.9693	126.295	71.6612	72.5609	29.7523	27.412	52.2245	45.3168	55.2227	63.2932
sp|P38080|AKL1_YEAST	AKL1	Serine/threonine-protein kinase AKL1	0	U	K.STSYGAATIGSDEALANEK.T	14.4317	15.5189	19.464	17.9171	20.7834	13.6701	45.4191	39.0871	42.4574	50.9019	60.6732	45.6773
sp|P38080|AKL1_YEAST	AKL1	Serine/threonine-protein kinase AKL1	0	U	K.YAEGAYNFSK.Y	236.294	243.446	236.778	297.757	304.37	287.107	162.208	139.598	163.984	200.683	174.906	179.451
sp|P38080|AKL1_YEAST	AKL1	Serine/threonine-protein kinase AKL1	0	U	R.TTSNANSSGTANNPQEINTIQSPGIEDK.S	14.5772	18.0978	12.6941	24.4691	25.819	34.1855	22.145	27.2516	26.9447	27.8165	33.0421	22.5084
sp|P38080|AKL1_YEAST	AKL1	Serine/threonine-protein kinase AKL1	0	U	R.VEQQQQQQDQPK.G	47.4646	38.7789	51.2476	50.9718	57.6429	48.395	22.6666	27.1773	36.8281	37.7738	43.1908	31.0911
sp|P39010|AKR1_YEAST	AKR1	Palmitoyltransferase AKR1	0	U	R.AGALHATPLHWAAR.Y	35.1166	43.9878	42.5792	46.1687	37.258	30.9657	32.6274	25.538	47.4892	46.1324	45.4118	57.7907
sp|P39010|AKR1_YEAST	AKR1	Palmitoyltransferase AKR1	0	U	K.YLIQDGADFFQK.T	155.807	150.093	148.074	102.268	112.743	119.645	97.8215	112.705	105.201	150.676	142.785	143.995
sp|P39010|AKR1_YEAST	AKR1	Palmitoyltransferase AKR1	0	U	R.EALTHSGFDYHGYPIK.K	214.622	265.059	220.298	139.06	141.992	141.081	123.912	140.715	134.262	163.141	171.497	161.174
sp|P39010|AKR1_YEAST	AKR1	Palmitoyltransferase AKR1	0	U	R.IPTNYGWK.R	287.419	296.562	298.684	191.65	190.296	200.775	170.422	164.994	192.484	244.777	258.612	244.674
sp|P39010|AKR1_YEAST	AKR1	Palmitoyltransferase AKR1	0	U	K.DFWLTSDINAPLWR.R	53.6236	60.3262	58.5647	35.8385	32.7896	32.9636	38.2959	39.3335	40.2699	59.2512	52.48	60.74
sp|P39010|AKR1_YEAST	AKR1	Palmitoyltransferase AKR1	0	U	R.MGVHNVTLLR.S	41.7742	47.4149	50.1139	33.6921	30.9699	30.0741	21.5537	20.899	29.0836	34.6488	31.7949	38.0034
sp|P39010|AKR1_YEAST	AKR1	Palmitoyltransferase AKR1	0	U	K.DVEQGNDMV.-	63.932	74.9372	74.315	42.6381	42.3438	45.3096	61.031	49.2509	53.3514	81.1942	83.158	81.1572
sp|P39010|AKR1_YEAST	AKR1	Palmitoyltransferase AKR1	0	U	K.FVLPSYGR.M	71.7528	76.6687	85.3109	52.2642	43.9435	50.6053	48.7085	53.2097	46.0326	58.179	69.2091	66.1228
sp|P39010|AKR1_YEAST	AKR1	Palmitoyltransferase AKR1	0	U	R.MGVHNVTLLR.S	70.0837	68.099	78.0986	46.6475	45.5791	41.3546	37.0768	35.6319	41.6176	59.2072	57.9985	56.3377
sp|Q12013|AKR2_YEAST	AKR2	Probable palmitoyltransferase AKR2	0	U	K.GVEDSDMIPEGPSATTITHTISIDGLEPR.N	18.6708	16.5687	14.6513	5.06678	10.7375	11.0464	7.11225	6.00716	7.01283	9.88995	6.03667	5.83391
sp|Q12013|AKR2_YEAST	AKR2	Probable palmitoyltransferase AKR2	0	U	K.GVEDSDMIPEGPSATTITHTISIDGLEPR.N	45.1064	44.4466	45.8855	25.5567	21.9875	18.8077	13.9914	14.1013	20.3603	19.3662	14.2731	19.3519
sp|Q12013|AKR2_YEAST	AKR2	Probable palmitoyltransferase AKR2	0	U	K.TDDSLTSIQETIK.Q	229.331	232.923	240.384	94.5755	99.7894	116.535	85.1548	82.4584	85.1117	66.9446	73.2729	69.2835
sp|Q12013|AKR2_YEAST	AKR2	Probable palmitoyltransferase AKR2	0	U	R.FFYSSDTSK.A	27.3122	27.6716	29.3155	13.7268	9.92773	15.3141	17.0024	17.23	19.2568	11.1347	13.2464	13.5924
sp|Q12013|AKR2_YEAST	AKR2	Probable palmitoyltransferase AKR2	0	U	K.SLFEQALQHHGYDR.L	71.5457	68.2897	69.5799	33.4938	29.6776	36.1155	35.4928	28.3789	35.0835	25.1727	21.1037	26.7739
sp|P47019|ALB1_YEAST	ALB1	Ribosome biogenesis protein ALB1	0	U	K.NESQNSTAVTLQNASSSPASITTR.T	0.000800303	0	0	2.53714	0	1.2511	23.745	23.1359	20.1542	21.1686	24.2722	23.6018
sp|P47019|ALB1_YEAST	ALB1	Ribosome biogenesis protein ALB1	0	U	K.LEDEMDIDLDGGKK.V	11.0974	12.1205	10.2409	15.5451	18.1537	19.5524	86.7087	76.1731	86.4617	64.5422	70.491	63.3969
sp|P47019|ALB1_YEAST	ALB1	Ribosome biogenesis protein ALB1	0	U	K.LTSNLHHK.V	48.9072	32.1009	38.6556	67.88	59.1514	64.1082	471.784	458.871	708.251	465.686	519.216	654.294
sp|P47019|ALB1_YEAST	ALB1	Ribosome biogenesis protein ALB1	0	U	K.SVALDLYFQNK.K	8.973	6.89935	5.99688	8.34371	4.70013	5.37814	21.1944	22.5816	20.9126	22.963	24.0495	23.5634
sp|P47019|ALB1_YEAST	ALB1	Ribosome biogenesis protein ALB1	0	U	K.LLVDASAK.L	29.8324	21.6616	27.5896	30.7966	20.4198	33.7064	181.991	176.646	170.326	165.665	187.888	167.489
sp|P47019|ALB1_YEAST	ALB1	Ribosome biogenesis protein ALB1	0	U	K.SVALDLYFQNK.K	8.43504	11.6036	7.13686	10.6861	10.6283	10.3449	69.0071	73.2351	74.158	53.0422	66.2575	60.2894
sp|P47019|ALB1_YEAST	ALB1	Ribosome biogenesis protein ALB1	0	U	K.LEDEMDIDLDGGK.K	60.4871	64.0025	69.704	54.3061	57.4368	56.6507	192.788	182.256	178.172	163.888	168.169	170.103
sp|P47019|ALB1_YEAST	ALB1	Ribosome biogenesis protein ALB1	0	U	K.LEDEMDIDLDGGKK.V	43.9696	36.3138	49.9766	60.5969	68.4834	54.3578	247.844	244.32	277.147	224.499	202.108	226.957
sp|P47019|ALB1_YEAST	ALB1	Ribosome biogenesis protein ALB1	0	U	K.LEDEMDIDLDGGK.K	0.00148329	2.99071	0	2.05171	2.49385	3.0729	30.4498	24.6822	22.2928	24.3422	26.3042	25.5854
sp|P47019|ALB1_YEAST	ALB1	Ribosome biogenesis protein ALB1	0	U	K.LLVDASAK.L	101.672	94.7554	99.4274	121.944	133.813	112.671	1027.81	1095.76	992.825	991.285	944.705	951.264
sp|P47019|ALB1_YEAST	ALB1	Ribosome biogenesis protein ALB1	0	U	K.LEDEMDIDLDGGK.K	47.9759	56.0568	55.7319	56.354	52.9152	47.8892	152.381	140.902	122.473	121.532	136.48	135.107
sp|P47771|ALDH2_YEAST	ALD2	Aldehyde dehydrogenase [NAD(P)+] 1	0	U	R.YFAGSADK.F	342.735	414.842	360.053	320.568	331.889	346.603	58.4967	61.7148	60.3692	67.9157	61.1541	64.327
sp|P47771|ALDH2_YEAST	ALD2	Aldehyde dehydrogenase [NAD(P)+] 1	0	U	K.AGTVWINSSNDEDVTVPFGGFK.M	37.1713	44.7044	43.1911	33.2544	33.7718	42.6809	12.5748	10.0563	10.0369	11.3647	9.7787	14.4734
sp|P47771|ALDH2_YEAST	ALD2	Aldehyde dehydrogenase [NAD(P)+] 1	0	U	K.AGTVWINSSNDEDVTVPFGGFK.M	417.675	389.864	361.884	352.261	361.951	389.868	77.3481	73.6927	95.3289	85.9128	76.7263	82.4998
sp|P47771|ALDH2_YEAST	ALD2	Aldehyde dehydrogenase [NAD(P)+] 1	0	U	K.VGGFVLEASGQSNLK.D	104.703	113.456	118.314	99.2112	114.939	110.83	26.54	21.8786	24.1432	34.2328	31.264	27.5511
sp|P47771|ALDH2_YEAST	ALD2	Aldehyde dehydrogenase [NAD(P)+] 1	0	U	K.GATIPLTFNK.F	49.4018	45.6229	50.0543	40.5671	43.7065	41.7877	6.51535	8.21397	6.98453	6.77738	9.79216	6.93203
sp|P47771|ALDH2_YEAST	ALD2	Aldehyde dehydrogenase [NAD(P)+] 1	0	U	K.GYFIPPTIFTDVPQTSK.L	60.4009	55.6387	53.0273	59.186	56.9053	59.7238	10.6598	11.1593	15.359	10.7152	16.3678	11.498
sp|P47771|ALDH2_YEAST	ALD2	Aldehyde dehydrogenase [NAD(P)+] 1	0	U	R.ELGQSGVDTYLQTK.A	14.645	18.9034	14.913	16.3843	12.8492	10.8271	2.07226	3.76469	5.44435	5.6319	0	0
sp|P47771|ALDH2_YEAST	ALD2	Aldehyde dehydrogenase [NAD(P)+] 1	0	U	K.GATIPLTFNK.F	221.483	232.856	224.832	212.396	196.681	215.452	43.6898	108.59	48.3646	55.0284	59.4951	59.6385
sp|P47771|ALDH2_YEAST	ALD2	Aldehyde dehydrogenase [NAD(P)+] 1	0	U	R.YFAGSADK.F	287.568	265.45	260.454	227.722	229.375	221.681	48.7724	46.8047	56.2166	52.8511	57.6043	49.1849
sp|P47771|ALDH2_YEAST	ALD2	Aldehyde dehydrogenase [NAD(P)+] 1	0	U	K.VGGFVLEASGQSNLK.D	244.862	245.012	276.788	210.103	204.139	212.358	49.0309	50.3826	53.8419	49.0089	36.7392	37.4082
sp|P47771|ALDH2_YEAST	ALD2	Aldehyde dehydrogenase [NAD(P)+] 1	0	U	K.VGGFVLEASGQSNLK.D	412.719	381.515	405.079	349.757	356.28	348.987	65.7892	63.1148	65.169	64.2854	64.9432	55.4659
sp|P47771|ALDH2_YEAST	ALD2	Aldehyde dehydrogenase [NAD(P)+] 1	0	U	K.GDLAQILQLTR.Y	123.022	140.709	125.078	120.718	122.285	133.339	38.3989	31.5805	35.3161	34.9491	32.2544	38.2962
sp|P47771|ALDH2_YEAST	ALD2	Aldehyde dehydrogenase [NAD(P)+] 1	0	U	K.AVHINLSLDN.-	62.2554	56.1047	52.1532	68.4919	66.5633	54.4944	23.9507	21.8569	19.0167	18.024	22.0724	21.5184
sp|P47771|ALDH2_YEAST	ALD2	Aldehyde dehydrogenase [NAD(P)+] 1	0	U	K.GATIPLTFNK.F	98.0172	95.8839	82.2991	77.8685	74.6331	74.6106	20.0727	16.052	21.5705	19.8972	19.0504	15.7225
sp|P47771|ALDH2_YEAST	ALD2	Aldehyde dehydrogenase [NAD(P)+] 1	0	U	K.AGTVWINSSNDEDVTVPFGGFK.M	43.3665	39.0924	43.9487	34.2314	47.9938	42.4089	10.073	7.75015	10.357	10.4045	7.73514	6.85853
sp|P47771|ALDH2_YEAST	ALD2	Aldehyde dehydrogenase [NAD(P)+] 1	0	U	K.AGFPPGVVNIVPGYGSLVGQALASHMDIDK.I	290.109	323.101	324.695	282.248	273.019	297.914	48.8612	43.4767	42.2332	55.0845	42.3883	51.1367
sp|P47771|ALDH2_YEAST	ALD2	Aldehyde dehydrogenase [NAD(P)+] 1	0	U	K.AGFPPGVVNIVPGYGSLVGQALASHMDIDK.I	105.908	117.807	132.389	105.277	110.703	114.177	18.1773	19.6759	14.2319	18.6785	16.2034	17.1929
sp|P47771|ALDH2_YEAST	ALD2	Aldehyde dehydrogenase [NAD(P)+] 1	0	U	K.GYFIPPTIFTDVPQTSK.L	375.646	364.102	368.82	409.196	410.192	398.071	84.8795	73.6474	97.7919	95.3295	94.8772	90.4746
sp|P54114|ALDH3_YEAST	ALD3	Aldehyde dehydrogenase [NAD(P)+] 2	0	U	K.VGGSVLEASGQSNLK.D	1189.84	1296	1161.67	1204.04	1193.93	1195.88	269.992	265.97	335.316	176.872	181.056	176.977
sp|P54114|ALDH3_YEAST	ALD3	Aldehyde dehydrogenase [NAD(P)+] 2	0	U	K.VGGSVLEASGQSNLK.D	249.782	259.538	214.914	236.007	227.31	227.034	51.6816	60.5531	57.2764	28.8864	27.7041	30.728
sp|P54114|ALDH3_YEAST	ALD3	Aldehyde dehydrogenase [NAD(P)+] 2	0	U	K.VGGSVLEASGQSNLK.D	222.52	219.088	210.637	227.334	221.173	228.786	61.6083	56.8133	57.0149	33.9467	35.6443	42.7081
sp|P54114|ALDH3_YEAST	ALD3	Aldehyde dehydrogenase [NAD(P)+] 2	0	U	K.VPFGGFK.M	360.208	356.386	347.583	330.38	335.486	337.463	120.452	110.528	117.072	66.7791	61.5883	57.6842
sp|P54114|ALDH3_YEAST	ALD3	Aldehyde dehydrogenase [NAD(P)+] 2	0	U	R.DEIFGPVVVVSK.F	1425.51	1550.04	1490.92	1531.03	1522.49	1624.86	419.238	437.968	447.687	182.293	164.371	163.308
sp|P54114|ALDH3_YEAST	ALD3	Aldehyde dehydrogenase [NAD(P)+] 2	0	U	R.DEIFGPVVVVSK.F	30.5533	28.6818	35.2446	33.8921	38.6909	34.1134	15.0587	14.3279	19.7737	13.3092	12.295	13.1061
sp|P54114|ALDH3_YEAST	ALD3	Aldehyde dehydrogenase [NAD(P)+] 2	0	U	K.AGTVWINQTNQEEAK.V	656.245	630.657	637.909	590.873	594.929	606.557	165.079	154.921	166.899	60.7667	75.3574	60.6674
sp|P54114|ALDH3_YEAST	ALD3	Aldehyde dehydrogenase [NAD(P)+] 2	0	U	K.FNM*GETIPLTFNK.F	118.874	124.138	126.687	117.903	110.962	116.488	29.9061	37.8445	34.5423	22.2602	14.2634	17.6613
sp|P54114|ALDH3_YEAST	ALD3	Aldehyde dehydrogenase [NAD(P)+] 2	0	U	R.YYAGAVDK.F	815.69	831.463	837.446	789.659	798.418	794.171	173.8	161.685	198.961	83.0983	78.5434	80.2591
sp|P54114|ALDH3_YEAST	ALD3	Aldehyde dehydrogenase [NAD(P)+] 2	0	U	R.ESGDTGVDNYLQIK.S	703.225	763.135	723.4	768.319	810.724	814.547	236.353	238.111	277.266	98.9192	84.3023	85.1477
sp|P54114|ALDH3_YEAST	ALD3	Aldehyde dehydrogenase [NAD(P)+] 2	0	U	R.ESGDTGVDNYLQIK.S	45.18	41.3194	43.7455	40.688	37.4402	45.8581	12.2351	12.4878	12.4715	3.49413	7.89274	5.80561
sp|P54114|ALDH3_YEAST	ALD3	Aldehyde dehydrogenase [NAD(P)+] 2	0	U	R.DEIFGPVVVVSK.F	63.6695	77.5636	61.9351	68.6277	62.7543	63.8812	23.0661	28.3495	26.1779	10.9643	11.0471	12.277
sp|P54114|ALDH3_YEAST	ALD3	Aldehyde dehydrogenase [NAD(P)+] 2	0	U	K.AGTVWINQTNQEEAK.V	37.499	39.7828	45.4683	31.2351	24.2341	30.0734	9.95381	10.6244	7.40086	4.91694	0	0
sp|P54114|ALDH3_YEAST	ALD3	Aldehyde dehydrogenase [NAD(P)+] 2	0	U	K.ALGTHMDIDK.I	18.6747	20.4352	15.7563	16.444	17.7316	18.6327	2.81166	6.56297	0	0	0.00969818	0.0243154
sp|P54114|ALDH3_YEAST	ALD3	Aldehyde dehydrogenase [NAD(P)+] 2	0	U	K.VGGSVLEASGQSNLK.D	45.5669	48.6344	56.3054	52.3848	43.9544	49.9777	14.6903	12.7676	12.1029	2.33666	4.88091	5.44585
sp|P54114|ALDH3_YEAST	ALD3	Aldehyde dehydrogenase [NAD(P)+] 2	0	U	K.VGGSVLEASGQSNLK.D	123.696	111.266	111.289	109.555	102.222	97.6008	19.0372	17.2474	22.6649	9.12675	7.34858	7.71672
sp|P54114|ALDH3_YEAST	ALD3	Aldehyde dehydrogenase [NAD(P)+] 2	0	U	K.VGGSVLEASGQSNLK.D	25.0175	23.0181	27.5968	24.5771	20.6613	23.1087	7.93012	6.09497	3.00372	2.63867	0	0
sp|P46367|ALDH4_YEAST	ALD4	Potassium-activated aldehyde dehydrogenase, mitochondrial	0	U	K.NEGATLITGGER.L	77.268	84.7435	75.9404	27.5271	28.7786	19.8718	19.5186	12.0119	17.0569	13.1581	13.7006	12.7099
sp|P46367|ALDH4_YEAST	ALD4	Potassium-activated aldehyde dehydrogenase, mitochondrial	0	U	K.IVGEAITNHPK.I	664.206	818.19	655.472	217.409	234.887	245.478	66.7158	66.924	57.6833	38.9946	31.3824	31.8343
sp|P46367|ALDH4_YEAST	ALD4	Potassium-activated aldehyde dehydrogenase, mitochondrial	0	U	K.NEGATLITGGER.L	44.8526	38.6165	37.313	13.6423	11.097	17.3877	5.97768	3.98798	5.30985	0	2.40621	5.92121
sp|P46367|ALDH4_YEAST	ALD4	Potassium-activated aldehyde dehydrogenase, mitochondrial	0	U	K.IVGEAITNHPK.I	46.7221	47.0095	42.3914	9.9164	18.3047	17.1495	6.70684	3.15899	2.88096	0	2.90149	0.012232
sp|P46367|ALDH4_YEAST	ALD4	Potassium-activated aldehyde dehydrogenase, mitochondrial	0	U	K.VAFTGSTATGR.H	58.9381	64.2595	63.2181	29.1275	32.1014	37.6864	18.2584	26.6232	21.4405	17.3997	14.5905	12.1439
sp|P46367|ALDH4_YEAST	ALD4	Potassium-activated aldehyde dehydrogenase, mitochondrial	0	U	K.EEIFGPVVTVTK.F	103.686	113.158	103.008	30.3734	29.2058	41.5957	12.5351	14.4286	17.0177	10.8904	7.40783	7.46444
sp|P46367|ALDH4_YEAST	ALD4	Potassium-activated aldehyde dehydrogenase, mitochondrial	0	U	K.PTVFGDVK.E	297.565	252.694	345.479	106.595	93.65	105.515	59.2204	62.9546	60.8271	53.6817	55.1381	41.235
sp|P46367|ALDH4_YEAST	ALD4	Potassium-activated aldehyde dehydrogenase, mitochondrial	0	U	K.TAESTPLSALYVSK.Y	542.541	464.847	441.665	170.569	139.231	139.547	47.398	43.2754	55.8213	22.0749	25.2797	37.2414
sp|P46367|ALDH4_YEAST	ALD4	Potassium-activated aldehyde dehydrogenase, mitochondrial	0	U	R.AFSNGSWNGIDPIDR.G	41.8985	38.1177	36.5542	10.4288	8.47359	9.4879	7.39983	4.39448	4.91834	3.57672	2.97384	2.79744
sp|P46367|ALDH4_YEAST	ALD4	Potassium-activated aldehyde dehydrogenase, mitochondrial	0	U	K.DVIASIETLDNGK.A	39.5217	50.3307	43.7918	13.0572	16.7097	13.6113	7.44759	7.63753	7.53278	0	0	2.66975
sp|P46367|ALDH4_YEAST	ALD4	Potassium-activated aldehyde dehydrogenase, mitochondrial	0	U	K.AASESIK.V	1082.82	1208.26	1107.92	265.212	263.662	315.289	97.0804	93.3945	79.036	30.7345	37.8702	41.6661
sp|P46367|ALDH4_YEAST	ALD4	Potassium-activated aldehyde dehydrogenase, mitochondrial	0	U	R.EDDVEEAVQAADR.A	196.86	201.753	210.463	89.4619	95.5692	86.5287	19.62	23.7294	23.3639	34.0129	33.3167	32.6443
sp|P46367|ALDH4_YEAST	ALD4	Potassium-activated aldehyde dehydrogenase, mitochondrial	0	U	K.AASESIK.V	52.4504	47.8378	52.0417	10.2445	12.7067	13.4293	6.45042	7.32617	5.78935	0	0	4.02512
sp|P46367|ALDH4_YEAST	ALD4	Potassium-activated aldehyde dehydrogenase, mitochondrial	0	U	K.SSAGFADK.I	27.9116	30.8258	25.2765	7.2221	10.6614	7.99681	0	3.82003	0.0366956	0	0	0.0139784
sp|P46367|ALDH4_YEAST	ALD4	Potassium-activated aldehyde dehydrogenase, mitochondrial	0	U	K.SSAGFADK.I	352.694	361.658	352.259	161.949	161.492	165.716	61.9301	54.6588	61.342	54.5026	51.5301	49.1709
sp|P46367|ALDH4_YEAST	ALD4	Potassium-activated aldehyde dehydrogenase, mitochondrial	0	U	K.VAFTGSTATGR.H	254.251	251.526	263.367	53.6991	73.7311	70.3075	16.9851	14.2839	20.8855	11.3056	7.03037	8.17856
sp|P46367|ALDH4_YEAST	ALD4	Potassium-activated aldehyde dehydrogenase, mitochondrial	0	U	R.LAELIEQDK.D	85.7814	72.4777	84.5302	28.7489	22.7306	26.7352	7.91253	3.99053	10.6719	4.73123	6.81945	4.01316
sp|P46367|ALDH4_YEAST	ALD4	Potassium-activated aldehyde dehydrogenase, mitochondrial	0	U	K.VAFTGSTATGR.H	67.7595	71.3879	71.096	15.9697	16.2229	21.634	3.33071	5.23446	5.15614	0	2.76976	0.0199772
sp|P46367|ALDH4_YEAST	ALD4	Potassium-activated aldehyde dehydrogenase, mitochondrial	0	U	K.VGDPFDESTFQGAQTSQM*QLNK.I	23.9307	17.966	28.4095	10.5604	9.313	7.61184	4.8312	3.7385	3.27952	4.5868	4.36268	4.09888
sp|P46367|ALDH4_YEAST	ALD4	Potassium-activated aldehyde dehydrogenase, mitochondrial	0	U	K.VGDPFDESTFQGAQTSQM*QLNK.I	119.477	112.31	115.11	25.7696	29.1278	35.5637	10.101	8.10548	10.9753	2.4661	4.57743	6.18201
sp|P46367|ALDH4_YEAST	ALD4	Potassium-activated aldehyde dehydrogenase, mitochondrial	0	U	R.HIYQSAAAGLK.K	64.9986	67.3852	66.2947	26.1137	23.0235	19.8724	6.08192	3.46587	6.54481	0	0	2.98973
sp|P46367|ALDH4_YEAST	ALD4	Potassium-activated aldehyde dehydrogenase, mitochondrial	0	U	R.EDDVEEAVQAADR.A	99.6351	113.047	105.293	26.9142	28.8541	27.9069	9.78502	8.04001	11.3723	6.20491	3.17649	0
sp|P46367|ALDH4_YEAST	ALD4	Potassium-activated aldehyde dehydrogenase, mitochondrial	0	U	R.VYVEESIYDK.F	673.177	720.186	715.224	186.735	212.214	215.091	99.7758	105.414	94.8941	77.3562	68.555	80.1797
sp|P46367|ALDH4_YEAST	ALD4	Potassium-activated aldehyde dehydrogenase, mitochondrial	0	U	K.VAFTGSTATGR.H	114.277	114.435	115.824	32.529	33.6763	30.6243	11.9333	12.5042	14.2026	9.38026	7.23674	5.34907
sp|P46367|ALDH4_YEAST	ALD4	Potassium-activated aldehyde dehydrogenase, mitochondrial	0	U	R.VYVEESIYDK.F	30.5429	38.4295	29.7609	8.10747	4.52243	12.2834	2.9744	3.2016	5.29337	2.84906	0	0
sp|P46367|ALDH4_YEAST	ALD4	Potassium-activated aldehyde dehydrogenase, mitochondrial	0	U	K.IVGEAITNHPK.I	308.149	442.908	342.082	106.728	110.928	109.82	49.2245	55.2108	60.3895	41.0275	45.3593	45.8729
sp|P46367|ALDH4_YEAST	ALD4	Potassium-activated aldehyde dehydrogenase, mitochondrial	0	U	R.EDDVEEAVQAADR.A	40.9532	49.2536	47.0073	16.9723	7.59111	17.1254	4.26507	5.83848	6.10625	3.83604	2.85409	2.75861
sp|P46367|ALDH4_YEAST	ALD4	Potassium-activated aldehyde dehydrogenase, mitochondrial	0	U	K.IVGEAITNHPK.I	807.569	854.487	797.259	218.797	244.494	260.593	63.2707	54.8522	63.9159	28.1266	34.1957	26.3141
sp|P46367|ALDH4_YEAST	ALD4	Potassium-activated aldehyde dehydrogenase, mitochondrial	0	U	K.IVGEAITNHPK.I	103.716	118.249	117.059	47.8811	43.0106	33.8351	12.2778	8.62827	8.61077	5.31868	2.21916	2.31918
sp|P46367|ALDH4_YEAST	ALD4	Potassium-activated aldehyde dehydrogenase, mitochondrial	0	U	R.EDDVEEAVQAADR.A	77.4443	72.8511	77.5154	26.2545	19.3014	23.7266	7.74585	12.1259	6.11808	4.7374	4.72805	0
sp|P46367|ALDH4_YEAST	ALD4	Potassium-activated aldehyde dehydrogenase, mitochondrial	0	U	R.EDDVEEAVQAADR.A	211.494	219.263	224.905	68.0247	75.7444	79.5	29.6242	29.3344	27.8484	23.79	23.3052	17.4975
sp|P46367|ALDH4_YEAST	ALD4	Potassium-activated aldehyde dehydrogenase, mitochondrial	0	U	R.VYVEESIYDK.F	83.4364	87.2279	77.9559	17.1742	17.1629	22.6507	11.6403	6.99423	8.09474	0	6.37724	3.62737
sp|P46367|ALDH4_YEAST	ALD4	Potassium-activated aldehyde dehydrogenase, mitochondrial	0	U	K.AASESIK.V	25.1193	25.0716	27.4374	7.48268	13.9854	4.74114	2.42355	4.32239	3.52563	0	0	0.0153434
sp|P46367|ALDH4_YEAST	ALD4	Potassium-activated aldehyde dehydrogenase, mitochondrial	0	U	R.AFSNGSWNGIDPIDR.G	104.172	97.9892	100.369	28.5642	31.5332	32.9184	10.2901	12.7641	16.1611	6.47833	9.13558	6.20031
sp|P46367|ALDH4_YEAST	ALD4	Potassium-activated aldehyde dehydrogenase, mitochondrial	0	U	R.EDDVEEAVQAADR.A	120.335	118.251	118.098	34.8691	39.6028	39.8106	16.8669	10.1233	11.8567	9.29856	8.47544	4.81908
sp|P46367|ALDH4_YEAST	ALD4	Potassium-activated aldehyde dehydrogenase, mitochondrial	0	U	K.TAESTPLSALYVSK.Y	64.2683	57.9996	50.3468	16.0904	16.839	16.3999	2.24147	2.74685	6.29376	0	0	2.84704
sp|P46367|ALDH4_YEAST	ALD4	Potassium-activated aldehyde dehydrogenase, mitochondrial	0	U	R.VYVEESIYDK.F	35.0762	38.3626	33.1223	4.83745	10.463	9.36813	4.27352	3.45356	0	0	0.0144043	0.0128326
sp|P46367|ALDH4_YEAST	ALD4	Potassium-activated aldehyde dehydrogenase, mitochondrial	0	U	K.SSAGFADK.I	642.284	652.147	668.118	174.14	177.651	192.678	46.7481	46.9443	50.8195	20.5058	22.8001	28.4307
sp|P46367|ALDH4_YEAST	ALD4	Potassium-activated aldehyde dehydrogenase, mitochondrial	0	U	K.VAFTGSTATGR.H	118.929	117.073	121.94	32.5584	37.962	38.656	6.2876	7.97443	12.6242	7.88202	0	6.29237
sp|P46367|ALDH4_YEAST	ALD4	Potassium-activated aldehyde dehydrogenase, mitochondrial	0	U	K.IVGEAITNHPK.I	163.623	171.944	168.809	40.9265	44.2206	50.466	12.9993	17.1208	14.4511	5.99551	2.86689	5.27657
sp|P46367|ALDH4_YEAST	ALD4	Potassium-activated aldehyde dehydrogenase, mitochondrial	0	U	K.NEGATLITGGER.L	132.32	133.843	143.476	37.7685	38.8375	36.8423	6.92645	9.37837	10.7477	5.31394	1.9781	5.30979
sp|P46367|ALDH4_YEAST	ALD4	Potassium-activated aldehyde dehydrogenase, mitochondrial	0	U	K.AASESIK.V	166.868	170.231	196.45	40.359	47.9684	51.8925	22.5228	22.7323	24.0248	11.9497	8.88694	14.2806
sp|P46367|ALDH4_YEAST	ALD4	Potassium-activated aldehyde dehydrogenase, mitochondrial	0	U	K.NEGATLITGGER.L	425.677	466.093	459.292	117.554	114.705	143.591	46.0516	45.1308	47.6834	25.4253	34.3345	42.1203
sp|P46367|ALDH4_YEAST	ALD4	Potassium-activated aldehyde dehydrogenase, mitochondrial	0	U	K.VAFTGSTATGR.H	54.3412	43.9541	45.466	12.2768	10.4689	18.0435	2.91327	6.50582	9.52948	0	0	0.0239917
sp|P40047|ALDH5_YEAST	ALD5	Aldehyde dehydrogenase 5, mitochondrial	0	U	K.IAFTGSTATGR.H	12.3307	10.2417	18.6857	5.99627	4.08027	5.88876	12.4073	14.1938	16.7347	13.8971	15.0288	16.9536
sp|P40047|ALDH5_YEAST	ALD5	Aldehyde dehydrogenase 5, mitochondrial	0	U	K.IYGNVIDTGK.N	361.208	339.921	347.608	205.37	216.276	236.314	403.107	391.686	363.368	405.606	356.18	365.452
sp|P40047|ALDH5_YEAST	ALD5	Aldehyde dehydrogenase 5, mitochondrial	0	U	K.IYGNVIDTGK.N	246.488	263.156	272.864	141.186	142.709	157.581	136.002	136.333	127.001	119.525	122.03	134.011
sp|P40047|ALDH5_YEAST	ALD5	Aldehyde dehydrogenase 5, mitochondrial	0	U	K.HQETLAAIESMDNGK.S	177.251	199.425	195.629	123.473	118.781	128.831	242.738	234.682	250.316	235.125	249.407	263.854
sp|P40047|ALDH5_YEAST	ALD5	Aldehyde dehydrogenase 5, mitochondrial	0	U	K.IYGNVIDTGK.N	147.551	129.15	139.227	111.7	105.411	105.33	238.76	224.168	241.28	227.882	243.846	255.838
sp|P40047|ALDH5_YEAST	ALD5	Aldehyde dehydrogenase 5, mitochondrial	0	U	K.PTVFADVK.E	40.5895	30.3429	40.8884	25.9506	25.105	26.4016	37.6141	33.837	39.1848	36.2514	41.4197	39.8624
sp|P40047|ALDH5_YEAST	ALD5	Aldehyde dehydrogenase 5, mitochondrial	0	U	K.PTVFADVK.E	94.1566	85.3543	112.623	53.9505	65.1524	63.5807	124.363	109.401	120.919	134.652	116.593	109.419
sp|P40047|ALDH5_YEAST	ALD5	Aldehyde dehydrogenase 5, mitochondrial	0	U	K.AMEDDVDEAVAAAK.K	27.1039	38.4733	28.8084	18.3698	16.9899	19.3688	43.7269	42.3598	40.9747	33.5893	39.4037	36.6328
sp|P40047|ALDH5_YEAST	ALD5	Aldehyde dehydrogenase 5, mitochondrial	0	U	K.VAADTVK.K	114.56	119.522	120.617	99.1246	104.838	96.4711	168.469	168.773	162.448	210.609	199.394	182.657
sp|P40047|ALDH5_YEAST	ALD5	Aldehyde dehydrogenase 5, mitochondrial	0	U	K.SPNIVFADADLDK.A	30.9775	33.9495	28.3141	22.8288	25.074	27.0131	42.9821	37.2936	39.1929	29.0529	39.792	31.4185
sp|P40047|ALDH5_YEAST	ALD5	Aldehyde dehydrogenase 5, mitochondrial	0	U	R.IYIQDTVYEEVLQK.L	434.806	419.801	403.96	204.262	219.581	219.481	579.321	583.979	529.432	563.99	550.866	558.255
sp|P40047|ALDH5_YEAST	ALD5	Aldehyde dehydrogenase 5, mitochondrial	0	U	R.EMGEAALSNYTQTK.S	23.0809	29.8285	25.6224	21.2063	15.3835	17.9568	32.6084	28.1171	21.4896	27.5949	25.9751	29.1937
sp|P40047|ALDH5_YEAST	ALD5	Aldehyde dehydrogenase 5, mitochondrial	0	U	K.SPNIVFADADLDK.A	23.5892	17.0864	14.1309	12.8611	12.5179	11.9792	18.1087	22.7758	18.4443	23.5083	14.7338	16.787
sp|P40047|ALDH5_YEAST	ALD5	Aldehyde dehydrogenase 5, mitochondrial	0	U	R.IAIDKPIR.-	107.414	74.2518	78.2003	114.415	53.8562	57.9832	141.923	60.2713	66.5558	76.736	78.3973	114.205
sp|P40047|ALDH5_YEAST	ALD5	Aldehyde dehydrogenase 5, mitochondrial	0	U	K.TFDVINPSNEEK.I	15.7157	14.3636	13.3339	7.4489	5.37687	12.3216	14.3384	14.4591	15.8259	16.1413	18.0155	13.2157
sp|P40047|ALDH5_YEAST	ALD5	Aldehyde dehydrogenase 5, mitochondrial	0	U	K.WSIVEPEVR.A	80.6572	84.3472	94.7444	45.1626	49.8713	54.1481	108.654	108.62	100.972	104.072	100.283	109.136
sp|P40047|ALDH5_YEAST	ALD5	Aldehyde dehydrogenase 5, mitochondrial	0	U	K.ILDYVDVAK.S	111.673	116.764	125.232	85.5202	92.552	81.7641	142.073	148.702	150.655	142.275	159.134	131.981
sp|P40047|ALDH5_YEAST	ALD5	Aldehyde dehydrogenase 5, mitochondrial	0	U	K.HQETLAAIESMDNGK.S	9.7476	12.1779	9.78412	5.87987	6.99428	5.46383	9.05106	12.972	8.78802	16.4316	11.4207	10.1441
sp|P40047|ALDH5_YEAST	ALD5	Aldehyde dehydrogenase 5, mitochondrial	0	U	K.EEVFGPIVTVSK.F	29.8426	37.7404	26.8965	21.49	18.0338	23.233	42.4539	51.6296	37.3717	48.9968	49.8103	45.1634
sp|P40047|ALDH5_YEAST	ALD5	Aldehyde dehydrogenase 5, mitochondrial	0	U	K.VGDPFDEEVFQGAQTSDK.Q	100.332	97.0553	100.306	74.6805	73.335	67.9522	114.853	116.773	122.329	123.533	120.393	112.425
sp|P40047|ALDH5_YEAST	ALD5	Aldehyde dehydrogenase 5, mitochondrial	0	U	K.VGDPFDEEVFQGAQTSDK.Q	96.0259	108.926	109.295	73.2631	84.0392	71.8707	128.265	124.895	136.946	136.896	133.375	123.867
sp|P40047|ALDH5_YEAST	ALD5	Aldehyde dehydrogenase 5, mitochondrial	0	U	R.EMGEAALSNYTQTK.S	19.5507	25.9258	27.3016	19.2252	17.834	17.5613	30.7532	32.9412	34.3448	40.9286	37.3184	30.4636
sp|P54115|ALDH6_YEAST	ALD6	Magnesium-activated aldehyde dehydrogenase, cytosolic	0	U	R.AFHDTEWATQDPR.E	20.2503	21.4545	25.3979	91.5235	76.0035	65.5836	97.1526	84.3894	120.816	100.797	92.6905	124.96
sp|P54115|ALDH6_YEAST	ALD6	Magnesium-activated aldehyde dehydrogenase, cytosolic	0	U	R.AFHDTEWATQDPR.E	13.1648	10.3607	19.0031	68.451	41.0747	41.5653	58.609	57.569	80.4962	59.2482	59.657	81.5482
sp|P54115|ALDH6_YEAST	ALD6	Magnesium-activated aldehyde dehydrogenase, cytosolic	0	U	R.EMGEEVYHAYTEVK.A	42.0895	36.1366	46.3778	51.5403	62.6959	53.0261	58.2527	57.6578	66.955	65.3179	61.2167	61.416
sp|P54115|ALDH6_YEAST	ALD6	Magnesium-activated aldehyde dehydrogenase, cytosolic	0	U	K.LHFDTAEPVK.I	73.8954	84.0342	77.5131	152.713	156.445	143.152	244.493	244.656	236.024	236.296	234.988	226.116
sp|P54115|ALDH6_YEAST	ALD6	Magnesium-activated aldehyde dehydrogenase, cytosolic	0	U	R.DAAAYADK.V	5.77575	7.8135	10.8703	15.654	17.0332	17.7474	19.3588	17.4595	14.9864	18.9794	17.1602	12.2092
sp|P54115|ALDH6_YEAST	ALD6	Magnesium-activated aldehyde dehydrogenase, cytosolic	0	U	R.DAAAYADK.V	468.692	447.044	436.754	1018.67	988.562	980.305	956.911	969.079	939.543	1003.53	1025.6	1020.95
sp|P54115|ALDH6_YEAST	ALD6	Magnesium-activated aldehyde dehydrogenase, cytosolic	0	U	R.EMGEEVYHAYTEVK.A	28.9435	29.6414	40.5612	50.1337	44.7338	56.6349	61.9372	52.3839	57.9295	51.5129	53.0161	57.0153
sp|P54115|ALDH6_YEAST	ALD6	Magnesium-activated aldehyde dehydrogenase, cytosolic	0	U	R.PTVFYDVNEDM*R.I	31.1693	27.1288	30.7644	27.4087	33.0312	24.4354	18.0936	24.4047	22.5712	23.9774	17.6976	17.9572
sp|P54115|ALDH6_YEAST	ALD6	Magnesium-activated aldehyde dehydrogenase, cytosolic	0	U	K.SVAVDSSESNLK.K	12.6756	12.272	11.2579	19.2967	20.3674	18.631	14.6622	16.8042	11.9358	20.8007	12.2493	15.8314
sp|P54115|ALDH6_YEAST	ALD6	Magnesium-activated aldehyde dehydrogenase, cytosolic	0	U	K.VGNPFDK.A	1035.75	1057.8	1040.94	1952.69	1908.84	2003.38	1670.72	1821.4	1637.36	1820.86	1899.58	1881.76
sp|P54115|ALDH6_YEAST	ALD6	Magnesium-activated aldehyde dehydrogenase, cytosolic	0	U	K.SVAVDSSESNLK.K	225.969	223.774	255.027	400.752	431.935	398.743	351.745	348.039	361.12	351.05	362.476	353.044
sp|P54115|ALDH6_YEAST	ALD6	Magnesium-activated aldehyde dehydrogenase, cytosolic	0	U	K.VGNPFDK.A	54.1214	70.4944	67.6253	98.2384	107.646	103.41	81.4286	91.0856	81.2814	92.9261	89.6268	88.7103
sp|P54115|ALDH6_YEAST	ALD6	Magnesium-activated aldehyde dehydrogenase, cytosolic	0	U	K.ANFQGAITNR.Q	53.9027	44.3854	45.9691	82.7543	76.8499	81.8193	77.0477	67.3095	70.0192	71.4189	85.7321	83.6515
sp|P54115|ALDH6_YEAST	ALD6	Magnesium-activated aldehyde dehydrogenase, cytosolic	0	U	K.ITLELGGK.S	57.9042	62.5188	63.7049	99.0501	109.425	94.539	79.3665	85.2969	78.2931	77.237	96.4944	80.6628
sp|P54115|ALDH6_YEAST	ALD6	Magnesium-activated aldehyde dehydrogenase, cytosolic	0	U	K.LAFTGSTEVGK.S	15.3918	12.3009	12.3897	19.5632	18.6326	15.9461	18.1981	18.4451	15.4674	10.6599	14.0722	19.7569
sp|P54115|ALDH6_YEAST	ALD6	Magnesium-activated aldehyde dehydrogenase, cytosolic	0	U	K.VGIPAGVVNIVPGPGR.T	11.3327	17.7719	18.1964	26.6575	34.1143	28.6924	23.6208	27.4265	26.5022	22.8141	24.3224	24.5234
sp|P54115|ALDH6_YEAST	ALD6	Magnesium-activated aldehyde dehydrogenase, cytosolic	0	U	K.AGTVWINTYNDFDSR.V	20.6093	17.3636	22.0018	31.5164	40.5255	26.242	52.7948	51.9662	46.4318	53.5045	52.9073	48.0787
sp|P54115|ALDH6_YEAST	ALD6	Magnesium-activated aldehyde dehydrogenase, cytosolic	0	U	K.AYLETEIK.V	9.49929	6.62133	6.94828	14.789	15.8696	18.2655	14.9373	15.0472	11.5681	8.16047	17.6977	18.8227
sp|P54115|ALDH6_YEAST	ALD6	Magnesium-activated aldehyde dehydrogenase, cytosolic	0	U	K.ITLELGGK.S	5.35592	7.91347	10.1424	8.46142	9.75286	11.8051	9.18853	8.44418	9.53504	10.8173	10.5546	8.68876
sp|P54115|ALDH6_YEAST	ALD6	Magnesium-activated aldehyde dehydrogenase, cytosolic	0	U	R.EMGEEVYHAYTEVK.A	107.754	135.781	127.071	201.766	227.527	234.517	265.663	276.716	221.705	250.681	260.546	245.342
sp|P54115|ALDH6_YEAST	ALD6	Magnesium-activated aldehyde dehydrogenase, cytosolic	0	U	K.ITLELGGK.S	22.2769	32.7858	25.4069	28.2115	36.4542	23.946	24.8402	25.4677	18.8456	24.9724	24.2674	24.097
sp|P54115|ALDH6_YEAST	ALD6	Magnesium-activated aldehyde dehydrogenase, cytosolic	0	U	K.AYLETEIK.V	37.5009	26.0153	35.5707	36.7221	49.1625	41.2081	39.5891	41.2599	44.0014	40.954	41.3509	46.7329
sp|P54115|ALDH6_YEAST	ALD6	Magnesium-activated aldehyde dehydrogenase, cytosolic	0	U	R.EM*GEEVYHAYTEVK.A	235.876	200.727	189.943	125.039	133.349	128.946	219.502	239.579	198.636	233.382	216.886	215.542
sp|P54115|ALDH6_YEAST	ALD6	Magnesium-activated aldehyde dehydrogenase, cytosolic	0	U	K.TLEEGVEMANSSEFGLGSGIETESLSTGLK.V	22.5072	21.0114	26.7324	21.3595	15.8873	18.3729	19.4915	17.0133	21.062	22.014	24.4041	18.2252
sp|P54115|ALDH6_YEAST	ALD6	Magnesium-activated aldehyde dehydrogenase, cytosolic	0	U	K.TLEEGVEMANSSEFGLGSGIETESLSTGLK.V	16.3469	21.4663	23.7336	21.0918	15.8789	17.7797	22.5692	14.6628	19.6095	23.5934	21.0727	27.506
sp|P54115|ALDH6_YEAST	ALD6	Magnesium-activated aldehyde dehydrogenase, cytosolic	0	U	K.AYLETEIK.V	27.42	32.9875	31.154	41.6293	41.6856	47.8264	58.2679	56.976	47.1406	57.569	51.2933	55.6562
sp|P54115|ALDH6_YEAST	ALD6	Magnesium-activated aldehyde dehydrogenase, cytosolic	0	U	R.DAAAYADK.V	116.943	121.922	127.088	233.512	248.548	226.932	235.263	215.756	239.997	240.8	245.794	247.485
sp|P54115|ALDH6_YEAST	ALD6	Magnesium-activated aldehyde dehydrogenase, cytosolic	0	U	K.SVAVDSSESNLK.K	7.74829	6.95666	7.27827	14.4107	12.8207	13.314	6.73737	10.1567	11.1714	6.98612	6.96875	9.91273
sp|P54115|ALDH6_YEAST	ALD6	Magnesium-activated aldehyde dehydrogenase, cytosolic	0	U	K.AYLETEIK.V	11.8944	8.58465	8.90312	15.2611	12.5195	17.1338	14.3659	12.6756	13.3	15.5664	13.4551	11.3783
sp|P54115|ALDH6_YEAST	ALD6	Magnesium-activated aldehyde dehydrogenase, cytosolic	0	U	K.SVAVDSSESNLK.K	9.7434	10.8564	6.82698	15.5087	18.2925	15.6629	15.835	10.71	10.312	15.9964	15.4244	14.9489
sp|P54115|ALDH6_YEAST	ALD6	Magnesium-activated aldehyde dehydrogenase, cytosolic	0	U	K.ITLPNGLTYEQPTGLFINNK.F	100.369	98.0235	99.2643	245.442	230.821	219.702	321.161	315.954	355.718	303.742	320.672	358.458
sp|P54115|ALDH6_YEAST	ALD6	Magnesium-activated aldehyde dehydrogenase, cytosolic	0	U	R.VPFGGVK.Q	57.7824	61.0245	62.1008	92.628	100.059	108.788	103.65	102.989	104.124	102.491	101.514	105.257
sp|P54115|ALDH6_YEAST	ALD6	Magnesium-activated aldehyde dehydrogenase, cytosolic	0	U	R.DAAAYADK.V	101.155	92.3877	118.533	218.056	240.455	238.849	241.914	223.137	233.109	236.357	246.057	237.039
sp|P54115|ALDH6_YEAST	ALD6	Magnesium-activated aldehyde dehydrogenase, cytosolic	0	U	K.VGNPFDK.A	13.3642	14.0604	13.0459	16.0311	22.177	22.5724	15.8386	16.1261	12.2679	16.5998	17.3183	10.3851
sp|P54115|ALDH6_YEAST	ALD6	Magnesium-activated aldehyde dehydrogenase, cytosolic	0	U	R.EM*GEEVYHAYTEVK.A	60.0237	74.4876	61.9902	90.1361	101.556	85.1076	93.5387	93.7323	102.25	90.3862	94.4169	82.7327
sp|P54115|ALDH6_YEAST	ALD6	Magnesium-activated aldehyde dehydrogenase, cytosolic	0	U	R.EMGEEVYHAYTEVK.A	109.21	114.597	104.595	210.431	192.02	188.492	223.113	243.691	240.34	214.823	229.881	256.06
sp|P54115|ALDH6_YEAST	ALD6	Magnesium-activated aldehyde dehydrogenase, cytosolic	0	U	K.ANFQGAITNR.Q	10.1489	14.1543	12.7819	18.9189	23.322	17.6621	21.2361	20.5271	16.7557	24.0811	17.6936	20.1517
sp|P54115|ALDH6_YEAST	ALD6	Magnesium-activated aldehyde dehydrogenase, cytosolic	0	U	K.ITLELGGK.S	231.828	241.861	241.429	386.851	420.643	406.806	365.902	387.626	346.242	372.396	324.151	309.919
sp|P54115|ALDH6_YEAST	ALD6	Magnesium-activated aldehyde dehydrogenase, cytosolic	0	U	K.VGIPAGVVNIVPGPGR.T	43.7619	46.5949	45.3676	80.6909	90.6288	96.5203	71.2775	66.239	77.3461	82.3826	65.9551	85.8497
sp|P54115|ALDH6_YEAST	ALD6	Magnesium-activated aldehyde dehydrogenase, cytosolic	0	U	R.VPFGGVK.Q	118.443	116.561	116.152	239.654	239.821	235.42	227.051	235.724	199.788	218.086	220.959	209.666
sp|P54115|ALDH6_YEAST	ALD6	Magnesium-activated aldehyde dehydrogenase, cytosolic	0	U	R.VPFGGVK.Q	442.104	432.808	436.673	830.181	795.696	806.655	832.979	833.212	829.423	877.809	897.07	864.847
sp|P54115|ALDH6_YEAST	ALD6	Magnesium-activated aldehyde dehydrogenase, cytosolic	0	U	R.DAAAYADK.V	200.645	182.779	187.474	402.768	420.12	391.16	422.244	406.423	403.123	448.548	440.417	411.817
sp|P54115|ALDH6_YEAST	ALD6	Magnesium-activated aldehyde dehydrogenase, cytosolic	0	U	K.LHFDTAEPVK.I	26.7303	21.3736	20.9537	43.6791	45.6634	47.0594	63.6111	56.1875	54.5707	50.3002	44.8594	56.2246
sp|P54115|ALDH6_YEAST	ALD6	Magnesium-activated aldehyde dehydrogenase, cytosolic	0	U	K.LHFDTAEPVK.I	7.55894	8.93969	14.799	24.9265	21.3406	22.2172	34.9922	32.2896	31.762	47.8226	33.5959	34.5262
sp|P54115|ALDH6_YEAST	ALD6	Magnesium-activated aldehyde dehydrogenase, cytosolic	0	U	K.LHFDTAEPVK.I	4.87567	7.63796	7.27512	11.741	10.8595	11.3293	13.0849	18.5416	19.8418	13.4166	16.8416	21.12
sp|P54115|ALDH6_YEAST	ALD6	Magnesium-activated aldehyde dehydrogenase, cytosolic	0	U	R.AFHDTEWATQDPR.E	3.86727	2.31528	5.10304	16.0807	16.5409	13.2976	17.4982	17.5602	23.6424	18.9508	16.3604	24.1788
sp|P54115|ALDH6_YEAST	ALD6	Magnesium-activated aldehyde dehydrogenase, cytosolic	0	U	R.EM*GEEVYHAYTEVK.A	129.552	125.02	103.715	192.833	200.472	188.229	210.731	217.698	235.627	205.541	223.024	211.55
sp|P54115|ALDH6_YEAST	ALD6	Magnesium-activated aldehyde dehydrogenase, cytosolic	0	U	K.SVAVDSSESNLKK.I	12.0803	5.79273	8.146	51.7495	23.1639	20.7138	22.8717	4.95206	16.826	12.4211	9.52208	11.4768
sp|Q08548|ALE1_YEAST	ALE1	Lysophospholipid acyltransferase	0	U	K.NGLEIEEENLSK.A	196.094	182.026	187.229	173.583	170.328	188.01	154.834	135.179	122.624	206.189	234.74	210.31
sp|Q08548|ALE1_YEAST	ALE1	Lysophospholipid acyltransferase	0	U	K.NGLEIEEENLSK.A	94.842	85.2949	88.9513	78.9364	83.2469	90.1708	64.9322	57.1833	58.8232	84.6755	107.07	99.2474
sp|Q08548|ALE1_YEAST	ALE1	Lysophospholipid acyltransferase	0	U	R.EMLEAWNMNTNK.W	161.998	179.069	200.633	146.861	189.06	188.378	152.625	149.763	144.499	221.426	199.421	195.318
sp|Q08548|ALE1_YEAST	ALE1	Lysophospholipid acyltransferase	0	U	K.TAEEEEM*NLGIPPIELEK.W	24.5258	23.7734	25.0404	22.3969	25.7733	19.0337	18.7447	16.6774	14.5263	30.1249	24.4008	23.3803
sp|Q08548|ALE1_YEAST	ALE1	Lysophospholipid acyltransferase	0	U	K.DISASSPNLGGILK.A	123.666	132.214	132.612	148.516	140.376	140.097	84.5059	84.8189	88.4375	137.619	139.298	133.783
sp|Q08548|ALE1_YEAST	ALE1	Lysophospholipid acyltransferase	0	U	K.QVTEFFK.S	78.0543	80.8633	76.7362	78.1262	79.988	74.6511	46.7465	43.5189	48.5351	69.8547	63.903	66.4226
sp|Q08548|ALE1_YEAST	ALE1	Lysophospholipid acyltransferase	0	U	R.EDGVTPLPSK.K	84.9881	99.1127	91.9437	88.2122	93.4746	101.852	78.3106	65.8868	67.142	122.581	114.314	98.3059
sp|Q08548|ALE1_YEAST	ALE1	Lysophospholipid acyltransferase	0	U	-.MYNPVDAVLTK.I	310.857	332.92	327.995	290.29	307.857	325.164	227.075	217.106	213.464	329.846	357.476	337.645
sp|Q08548|ALE1_YEAST	ALE1	Lysophospholipid acyltransferase	0	U	R.NIDIWTVETAQNTR.E	43.1517	47.2494	43.7393	50.8662	54.8746	52.1301	40.6051	42.1861	34.4406	50.7304	52.1332	58.7081
sp|Q08548|ALE1_YEAST	ALE1	Lysophospholipid acyltransferase	0	U	K.DLTEHQK.S	44.576	47.7751	43.5976	49.3867	53.2927	60.9671	38.6398	34.6665	20.6721	49.292	56.1272	56.5412
sp|Q08548|ALE1_YEAST	ALE1	Lysophospholipid acyltransferase	0	U	-.MYNPVDAVLTK.I	77.7973	91.06	97.6961	85.9304	85.7155	84.7757	57.9979	55.3329	53.7133	90.487	86.2628	91.5262
sp|Q08548|ALE1_YEAST	ALE1	Lysophospholipid acyltransferase	0	U	-.MYNPVDAVLTK.I	13.6207	8.9187	14.5195	12.3688	13.2698	10.3796	7.81529	12.0068	6.90296	15.029	13.6912	9.31723
sp|Q08548|ALE1_YEAST	ALE1	Lysophospholipid acyltransferase	0	U	-.MYNPVDAVLTK.I	393.949	411.048	393.882	361.732	374.441	397.894	292.662	270.334	285.076	410.634	391.098	410.417
sp|Q08548|ALE1_YEAST	ALE1	Lysophospholipid acyltransferase	0	U	K.QEFSNAASGSGER.V	96.796	97.7011	112.902	102.358	106.419	101.839	80.8658	73.3843	72.8822	132.875	130.167	128.93
[truncated: 50,117 more rows]
